# Supplementary material
Source: publisher site journal article supplement (https://www.spandidos-publications.com/6486/downloadSupplementary)
Supplement: Supplementary file 1 [file downloadSupplementary]

## Sheet: KD VS NC
Table SVII.Differential proteins analysis
Accession	GeneName	Description	Coverage [%]	# Peptides	# PSMs	# Unique Peptides	# AAs	MW [kDa]	calc. pI	Score Mascot: Mascot	Abundances KD1	Abundances KD2	Abundances KD3	Abundances NC1	Abundances NC2	Abundances NC3	Average KD	Average NC	Regulation	KD/NC	P value
P02795	MT2A	Metallothionein-2 OS=Homo sapiens OX=9606 GN=MT2A PE=1 SV=1	67	4	21	1	61	6	7.83	636	145.3	122.9	130.9	66.3	55.8	78.7	133.033	66.9333	UP	1.98755	0.00208209
P52926	HMGA2	High mobility group protein HMGI-C OS=Homo sapiens OX=9606 GN=HMGA2 PE=1 SV=1	48	4	8	4	109	11.8	10.62	245	140.7	136.1	115.7	80.5	68.8	58.2	130.833	69.1667	UP	1.89157	0.00354266
P05121	SERPINE1	Plasminogen activator inhibitor 1 OS=Homo sapiens OX=9606 GN=SERPINE1 PE=1 SV=1	33	11	19	11	402	45	7.2	548	143.8	122.3	117.7	78.2	65.3	72.7	127.933	72.0667	UP	1.77521	0.00324697
O15075	DCLK1	Serine/threonine-protein kinase DCLK1 OS=Homo sapiens OX=9606 GN=DCLK1 PE=1 SV=2	3	2	2	2	740	82.2	8.66	36	131.9	131.6	117.7	76.1	70.4	72.3	127.067	72.9333	UP	1.74223	0.000404891
P04732	MT1E	Metallothionein-1E OS=Homo sapiens OX=9606 GN=MT1E PE=1 SV=1	67	4	13	2	61	6	7.96	262	139.3	118.4	123.1	72.2	62.4	84.6	126.933	73.0667	UP	1.73723	0.00394735
Q01628	IFITM3	Interferon-induced transmembrane protein 3 OS=Homo sapiens OX=9606 GN=IFITM3 PE=1 SV=2	12	1	1	1	133	14.6	7.01	102	145.9	117.4	113.4	64.2	72.1	86.9	125.567	74.4	UP	1.68772	0.0137806
P52566	ARHGDIB	Rho GDP-dissociation inhibitor 2 OS=Homo sapiens OX=9606 GN=ARHGDIB PE=1 SV=3	63	11	17	11	201	23	5.21	246	124.1	127.7	123.9	71	76.3	77	125.233	74.7667	UP	1.67499	2.38541e-05
Q8IVF2	AHNAK2	Protein AHNAK2 OS=Homo sapiens OX=9606 GN=AHNAK2 PE=1 SV=2	11	10	12	9	5795	616.2	5.36	233	133.7	119.5	122.2	78.5	74.7	71.4	125.133	74.8667	UP	1.67142	0.000474795
Q9BXT2	CACNG6	Voltage-dependent calcium channel gamma-6 subunit OS=Homo sapiens OX=9606 GN=CACNG6 PE=1 SV=1	3	1	1	1	260	28.1	9.17	22	132.6	121.1	117.9	75.7	71.4	81.3	123.867	76.1333	UP	1.62697	0.000844195
O75326	SEMA7A	Semaphorin-7A OS=Homo sapiens OX=9606 GN=SEMA7A PE=1 SV=1	23	12	13	12	666	74.8	7.64	290	144.1	113.3	113.3	80	71.4	77.8	123.567	76.4	UP	1.61736	0.0111975
Q9NS25	SPANXB1	Sperm protein associated with the nucleus on the X chromosome B1 OS=Homo sapiens OX=9606 GN=SPANXB1 PE=2 SV=2	63	4	12	3	103	11.8	6.15	381	133.1	117.8	117.6	77.9	75.3	78.3	122.833	77.1667	UP	1.59179	0.000940225
Q9Y653	ADGRG1	Adhesion G-protein coupled receptor G1 OS=Homo sapiens OX=9606 GN=ADGRG1 PE=1 SV=2	1	1	1	1	693	77.7	8.48	37	141.2	115.4	111.2	81	83.6	67.7	122.6	77.4333	UP	1.5833	0.0130132
Q96K17	BTF3L4	Transcription factor BTF3 homolog 4 OS=Homo sapiens OX=9606 GN=BTF3L4 PE=1 SV=1	20	5	6	3	158	17.3	6.35	123	124.5	113.7	127.8	76.3	77.1	80.7	122	78.0333	UP	1.56343	0.000598006
P02679	FGG	Fibrinogen gamma chain OS=Homo sapiens OX=9606 GN=FGG PE=1 SV=3	2	1	1	1	453	51.5	5.62	42	126.7	133.4	99.7	80	80.7	79.4	119.933	80.0333	UP	1.49854	0.0179743
Q14697	GANAB	Neutral alpha-glucosidase AB OS=Homo sapiens OX=9606 GN=GANAB PE=1 SV=3	44	33	69	33	944	106.8	6.14	1544	119.9	118.4	116.1	78.2	84.9	82.5	118.133	81.8667	UP	1.443	8.66445e-05
P46821	MAP1B	Microtubule-associated protein 1B OS=Homo sapiens OX=9606 GN=MAP1B PE=1 SV=2	40	75	124	75	2468	270.5	4.81	2971	121.6	118.7	113.6	81.3	82.3	82.5	117.967	82.0333	UP	1.43803	0.000109883
Q14061	COX17	Cytochrome c oxidase copper chaperone OS=Homo sapiens OX=9606 GN=COX17 PE=1 SV=2	11	1	1	1	63	6.9	7.24	19	126.7	114.7	112.3	84.8	78.7	82.8	117.9	82.1	UP	1.43605	0.00173013
P27701	CD82	CD82 antigen OS=Homo sapiens OX=9606 GN=CD82 PE=1 SV=1	18	4	7	4	267	29.6	5.24	220	123.1	116.8	113.4	77.9	90.2	78.6	117.767	82.2333	UP	1.4321	0.00191558
P21926	CD9	CD9 antigen OS=Homo sapiens OX=9606 GN=CD9 PE=1 SV=4	10	3	5	3	228	25.4	7.15	83	120.7	120.3	111.7	82.6	84.2	80.4	117.567	82.4	UP	1.42678	0.000359881
P02751	FN1	Fibronectin OS=Homo sapiens OX=9606 GN=FN1 PE=1 SV=5	11	23	27	23	2477	272.2	5.5	445	126.7	130	94.4	85.8	84.5	78.6	117.033	82.9667	UP	1.41061	0.042212
Q96S97	MYADM	Myeloid-associated differentiation marker OS=Homo sapiens OX=9606 GN=MYADM PE=1 SV=2	10	2	3	2	322	35.3	8.15	135	115.3	116	119.1	87.6	80.9	81.1	116.8	83.2	UP	1.40385	0.000174888
Q14533	KRT81	Keratin, type II cuticular Hb1 OS=Homo sapiens OX=9606 GN=KRT81 PE=1 SV=3	15	7	14	6	505	54.9	5.47	88	116.4	102.2	131.7	84.6	79.5	85.5	116.767	83.2	UP	1.40345	0.0183145
O14495	PLPP3	Phospholipid phosphatase 3 OS=Homo sapiens OX=9606 GN=PLPP3 PE=1 SV=1	5	1	1	1	311	35.1	9.14	0	122.5	108.7	118.9	85.1	80.4	84.3	116.7	83.2667	UP	1.40152	0.00158251
P04179	SOD2	Superoxide dismutase [Mn], mitochondrial OS=Homo sapiens OX=9606 GN=SOD2 PE=1 SV=3	33	9	19	9	222	24.7	8.25	354	116.8	121	111.6	78.1	91.3	81.2	116.467	83.5333	UP	1.39425	0.00240758
O95832	CLDN1	Claudin-1 OS=Homo sapiens OX=9606 GN=CLDN1 PE=1 SV=1	12	2	3	2	211	22.7	8.09	79	131.6	111.6	106.2	88.7	77	84.9	116.467	83.5333	UP	1.39425	0.0176431
P30530	AXL	Tyrosine-protein kinase receptor UFO OS=Homo sapiens OX=9606 GN=AXL PE=1 SV=4	19	12	14	12	894	98.3	5.39	310	126	110.6	112.7	83.8	75.7	91.3	116.433	83.6	UP	1.39274	0.00761885
Q13885	TUBB2A	Tubulin beta-2A chain OS=Homo sapiens OX=9606 GN=TUBB2A PE=1 SV=1	57	21	191	2	445	49.9	4.89	4114	118.8	119.5	110.9	81.2	85.6	84.1	116.4	83.6333	UP	1.39179	0.000422755
Q99942	RNF5	E3 ubiquitin-protein ligase RNF5 OS=Homo sapiens OX=9606 GN=RNF5 PE=1 SV=1	4	1	1	1	180	19.9	6.65	22	129.8	113.7	105.5	85.6	75.8	89.7	116.333	83.7	UP	1.38988	0.0166918
Q96HE7	ERO1A	ERO1-like protein alpha OS=Homo sapiens OX=9606 GN=ERO1A PE=1 SV=2	54	19	27	19	468	54.4	5.68	731	119.8	116.8	112.2	82	87.3	81.9	116.267	83.7333	UP	1.38854	0.000331404
Q9NXK6	PAQR5	Membrane progestin receptor gamma OS=Homo sapiens OX=9606 GN=PAQR5 PE=1 SV=2	2	1	1	1	330	38	8.31	0	107.7	112.5	127.2	84.6	81.8	86	115.8	84.1333	UP	1.37639	0.00615932
P11234	RALB	Ras-related protein Ral-B OS=Homo sapiens OX=9606 GN=RALB PE=1 SV=1	54	9	13	4	206	23.4	6.62	290	118.2	117.7	111.3	81	86.6	85.1	115.733	84.2333	UP	1.37396	0.000346458
P01584	IL1B	Interleukin-1 beta OS=Homo sapiens OX=9606 GN=IL1B PE=1 SV=2	5	1	1	1	269	30.7	4.83	17	132.3	104.8	110.1	87.3	81.1	84.5	115.733	84.3	UP	1.37287	0.0217731
Q9C002	NMES1	Normal mucosa of esophagus-specific gene 1 protein OS=Homo sapiens OX=9606 GN=NMES1 PE=2 SV=1	52	4	7	4	83	9.6	9.47	130	125.3	110.1	111.6	79.8	93.6	79.6	115.667	84.3333	UP	1.37154	0.0094601
Q8NDC0	MAPK1IP1L	MAPK-interacting and spindle-stabilizing protein-like OS=Homo sapiens OX=9606 GN=MAPK1IP1L PE=1 SV=4	7	1	2	1	245	24.3	5.62	160	114.2	115.4	117.4	85.4	84.7	82.9	115.667	84.3333	UP	1.37154	1.25286e-05
P23921	RRM1	Ribonucleoside-diphosphate reductase large subunit OS=Homo sapiens OX=9606 GN=RRM1 PE=1 SV=1	43	24	34	24	792	90	7.15	633	117.6	111.7	117.4	84	78.1	91.2	115.567	84.4333	UP	1.36873	0.00185303
Q6P9B6	MEAK7	MTOR-associated protein MEAK7 OS=Homo sapiens OX=9606 GN=MEAK7 PE=1 SV=2	36	11	20	11	456	51	6.24	739	117.5	116.3	112.6	86.3	84.9	82.4	115.467	84.5333	UP	1.36593	7.72768e-05
Q9BXN6	SPANXD	Sperm protein associated with the nucleus on the X chromosome D OS=Homo sapiens OX=9606 GN=SPANXD PE=1 SV=1	24	2	4	1	97	11	6.11	90	134	108.2	104.2	84.8	82.9	85.9	115.467	84.5333	UP	1.36593	0.0299889
Q6JBY9	RCSD1	CapZ-interacting protein OS=Homo sapiens OX=9606 GN=RCSD1 PE=1 SV=1	6	1	1	1	416	44.5	5.4	22	109.1	120	116.8	79.4	83.3	91.5	115.3	84.7333	UP	1.36074	0.00315273
Q01432	AMPD3	AMP deaminase 3 OS=Homo sapiens OX=9606 GN=AMPD3 PE=1 SV=1	12	9	9	9	767	88.8	6.98	178	121.3	113.6	110.5	90.6	85.9	78	115.133	84.8333	UP	1.35717	0.00342547
P28288	ABCD3	ATP-binding cassette sub-family D member 3 OS=Homo sapiens OX=9606 GN=ABCD3 PE=1 SV=1	27	16	23	16	659	75.4	9.36	480	115.7	115.1	114.6	81.1	86.9	86.6	115.133	84.8667	UP	1.35664	9.30537e-05
O75976	CPD	Carboxypeptidase D OS=Homo sapiens OX=9606 GN=CPD PE=1 SV=2	14	15	17	15	1380	152.8	6.05	374	130.4	106.8	107.9	83.9	82.4	88.6	115.033	84.9667	UP	1.35386	0.0191127
P07858	CTSB	Cathepsin B OS=Homo sapiens OX=9606 GN=CTSB PE=1 SV=3	27	7	10	7	339	37.8	6.3	255	124.7	109.9	110.4	84.5	85.8	84.7	115	85	UP	1.35294	0.00352166
Q9Y5U9	IER3IP1	Immediate early response 3-interacting protein 1 OS=Homo sapiens OX=9606 GN=IER3IP1 PE=1 SV=1	34	2	2	2	82	9	8.22	95	114.4	116.3	113.9	82	86.7	86.7	114.867	85.1333	UP	1.34926	6.70611e-05
Q9Y673	ALG5	Dolichyl-phosphate beta-glucosyltransferase OS=Homo sapiens OX=9606 GN=ALG5 PE=1 SV=1	32	9	14	9	324	36.9	9.28	361	114.5	117.3	112.8	84.2	84.6	86.6	114.867	85.1333	UP	1.34926	3.89649e-05
Q07954	LRP1	Prolow-density lipoprotein receptor-related protein 1 OS=Homo sapiens OX=9606 GN=LRP1 PE=1 SV=2	2	5	5	5	4544	504.3	5.39	83	130.3	104.5	109.7	90.3	86.8	78.5	114.833	85.2	UP	1.34781	0.0263463
Q6PI78	TMEM65	Transmembrane protein 65 OS=Homo sapiens OX=9606 GN=TMEM65 PE=1 SV=2	4	1	2	1	240	25.5	8.6	50	118.5	113.4	112.4	80.8	90.5	84.5	114.767	85.2667	UP	1.34597	0.000970388
P80297	MT1X	Metallothionein-1X OS=Homo sapiens OX=9606 GN=MT1X PE=1 SV=1	67	4	13	1	61	6.1	7.96	149	124	107.3	112.9	81.3	80	94.5	114.733	85.2667	UP	1.34558	0.0119988
O60711	LPXN	Leupaxin OS=Homo sapiens OX=9606 GN=LPXN PE=1 SV=1	2	1	1	1	386	43.3	6.01	26	119.8	109.3	115.1	83	82.2	90.6	114.733	85.2667	UP	1.34558	0.00189233
Q9UI42	CPA4	Carboxypeptidase A4 OS=Homo sapiens OX=9606 GN=CPA4 PE=1 SV=2	20	7	8	7	421	47.3	6.7	164	116.7	114.2	113.2	89.2	82.5	84.3	114.7	85.3333	UP	1.34414	0.00020112
Q14116	IL18	Interleukin-18 OS=Homo sapiens OX=9606 GN=IL18 PE=1 SV=1	56	9	13	9	193	22.3	4.67	297	118	112.8	113.1	86.4	84.6	85	114.633	85.3333	UP	1.34336	7.82925e-05
Q6PCE3	PGM2L1	Glucose 1,6-bisphosphate synthase OS=Homo sapiens OX=9606 GN=PGM2L1 PE=1 SV=3	19	9	11	8	622	70.4	7.15	172	119.3	114.1	110.4	85.3	86	85	114.6	85.4333	UP	1.3414	0.000358691
Q6UXH1	CRELD2	Protein disulfide isomerase CRELD2 OS=Homo sapiens OX=9606 GN=CRELD2 PE=1 SV=1	11	3	3	3	353	38.2	4.59	63	115.3	113.5	114.7	88.9	83	84.6	114.5	85.5	UP	1.33918	9.45562e-05
P09382	LGALS1	Galectin-1 OS=Homo sapiens OX=9606 GN=LGALS1 PE=1 SV=2	91	11	83	11	135	14.7	5.5	2340	116.6	114	112.8	81.6	90.1	84.9	114.467	85.5333	UP	1.33827	0.000439988
O15321	TM9SF1	Transmembrane 9 superfamily member 1 OS=Homo sapiens OX=9606 GN=TM9SF1 PE=2 SV=2	5	3	3	3	606	68.8	7.17	57	133.5	102.8	107	88.6	81.5	86.6	114.433	85.5667	UP	1.33736	0.042658
P17301	ITGA2	Integrin alpha-2 OS=Homo sapiens OX=9606 GN=ITGA2 PE=1 SV=1	29	22	28	22	1181	129.2	5.31	866	118.8	113.3	111	85.2	86.6	85	114.367	85.6	UP	1.33606	0.000263515
O95810	CAVIN2	Caveolae-associated protein 2 OS=Homo sapiens OX=9606 GN=CAVIN2 PE=1 SV=3	37	13	21	13	425	47.1	5.21	672	115.7	114.1	113.4	84	86.4	86.5	114.4	85.6333	UP	1.33593	1.11085e-05
Q5SZL2	CEP85L	Centrosomal protein of 85 kDa-like OS=Homo sapiens OX=9606 GN=CEP85L PE=1 SV=1	1	1	2	1	805	91.8	6.33	0	115.7	110.5	116.9	86.4	86.4	84.2	114.367	85.6667	UP	1.33502	0.000164952
P48060	GLIPR1	Glioma pathogenesis-related protein 1 OS=Homo sapiens OX=9606 GN=GLIPR1 PE=1 SV=3	4	1	2	1	266	30.3	8.48	45	117	109.5	116.6	84.7	85	87.3	114.367	85.6667	UP	1.33502	0.000366438
P63313	TMSB10	Thymosin beta-10 OS=Homo sapiens OX=9606 GN=TMSB10 PE=1 SV=2	66	4	13	2	44	5	5.36	142	119.5	116	107.3	68.3	94.1	94.8	114.267	85.7333	UP	1.33281	0.0391037
Q9UKV8	AGO2	Protein argonaute-2 OS=Homo sapiens OX=9606 GN=AGO2 PE=1 SV=3	33	22	31	19	859	97.1	9.19	563	113.2	115.4	114.1	86.3	85	86.1	114.233	85.8	UP	1.33139	2.98016e-06
Q4G0X4	KCTD21	BTB/POZ domain-containing protein KCTD21 OS=Homo sapiens OX=9606 GN=KCTD21 PE=1 SV=1	5	1	1	1	260	29.6	6.54	46	122.9	116	103.8	83.3	84.6	89.6	114.233	85.8333	UP	1.33087	0.00858848
Q9UM22	EPDR1	Mammalian ependymin-related protein 1 OS=Homo sapiens OX=9606 GN=EPDR1 PE=1 SV=2	28	6	7	6	224	25.4	6.6	144	125.8	110.2	106.4	84.1	87.5	86	114.133	85.8667	UP	1.32919	0.00932118
O43493	TGOLN2	Trans-Golgi network integral membrane protein 2 OS=Homo sapiens OX=9606 GN=TGOLN2 PE=1 SV=4	12	5	6	5	437	45.9	5.63	167	125.5	105.4	111.4	86.7	81.7	89.3	114.1	85.9	UP	1.32829	0.0113937
Q5JS37	NHLRC3	NHL repeat-containing protein 3 OS=Homo sapiens OX=9606 GN=NHLRC3 PE=2 SV=1	9	3	3	3	347	38.3	6.43	54	125.6	110.7	106	86.7	86.2	84.8	114.1	85.9	UP	1.32829	0.00896226
P15509	CSF2RA	Granulocyte-macrophage colony-stimulating factor receptor subunit alpha OS=Homo sapiens OX=9606 GN=CSF2RA PE=1 SV=1	4	1	1	1	400	46.2	7.75	42	121.4	110.7	110.2	81.9	79.2	96.6	114.1	85.9	UP	1.32829	0.0124282
Q2TB90	HKDC1	Hexokinase HKDC1 OS=Homo sapiens OX=9606 GN=HKDC1 PE=1 SV=3	5	6	6	3	917	102.5	7.12	68	117.9	110.6	113.7	87.2	82.1	88.5	114.067	85.9333	UP	1.32739	0.000614512
P49662	CASP4	Caspase-4 OS=Homo sapiens OX=9606 GN=CASP4 PE=1 SV=1	29	10	12	10	377	43.2	6	117	119.4	111.9	110.8	87.3	81.4	89.2	114.033	85.9667	UP	1.32648	0.00142945
O14832	PHYH	Phytanoyl-CoA dioxygenase, peroxisomal OS=Homo sapiens OX=9606 GN=PHYH PE=1 SV=1	2	1	1	1	338	38.5	8.47	0	106.5	125.1	110.1	86.9	86.8	84.6	113.9	86.1	UP	1.32288	0.00840548
P00749	PLAU	Urokinase-type plasminogen activator OS=Homo sapiens OX=9606 GN=PLAU PE=1 SV=2	28	9	12	9	431	48.5	8.41	286	115	116	110.6	89.6	84	84.7	113.867	86.1	UP	1.32249	0.000329121
P20908	COL5A1	Collagen alpha-1(V) chain OS=Homo sapiens OX=9606 GN=COL5A1 PE=1 SV=3	3	4	4	4	1838	183.4	5.06	55	125.2	106.1	110.2	86.1	86.2	86.2	113.833	86.1667	UP	1.32108	0.00886795
Q14764	MVP	Major vault protein OS=Homo sapiens OX=9606 GN=MVP PE=1 SV=4	60	41	80	41	893	99.3	5.48	2268	117.2	112.4	111.8	85.8	88.6	84.2	113.8	86.2	UP	1.32019	0.000207872
P43121	MCAM	Cell surface glycoprotein MUC18 OS=Homo sapiens OX=9606 GN=MCAM PE=1 SV=2	29	14	24	14	646	71.6	5.76	520	117.8	112.4	110.8	90	85.1	84	113.667	86.3667	UP	1.31609	0.00062681
P52823	STC1	Stanniocalcin-1 OS=Homo sapiens OX=9606 GN=STC1 PE=1 SV=1	6	1	1	1	247	27.6	7.99	60	126.3	108.8	105.8	92.7	89.6	76.8	113.633	86.3667	UP	1.31571	0.0274289
O95833	CLIC3	Chloride intracellular channel protein 3 OS=Homo sapiens OX=9606 GN=CLIC3 PE=1 SV=2	42	6	8	6	236	26.6	6.43	216	124.4	105.9	110.6	89.9	88.2	81	113.633	86.3667	UP	1.31571	0.0116182
Q9NUD5	ZCCHC3	Zinc finger CCHC domain-containing protein 3 OS=Homo sapiens OX=9606 GN=ZCCHC3 PE=1 SV=2	16	5	7	5	403	43.5	8.53	180	117.7	111.9	110.9	88.3	84.1	87.1	113.5	86.5	UP	1.31214	0.000391758
O95873	C6orf47	Uncharacterized protein C6orf47 OS=Homo sapiens OX=9606 GN=C6orf47 PE=1 SV=2	3	1	1	1	294	31.7	6.37	31	114.2	111.8	114.3	83.9	85	90.9	113.433	86.6	UP	1.30985	0.000320211
Q13751	LAMB3	Laminin subunit beta-3 OS=Homo sapiens OX=9606 GN=LAMB3 PE=1 SV=1	26	22	29	22	1172	129.5	7.21	700	118.5	111.7	109.9	87	84.7	88.3	113.367	86.6667	UP	1.30808	0.000696403
Q7Z7K0	CMC1	COX assembly mitochondrial protein homolog OS=Homo sapiens OX=9606 GN=CMC1 PE=1 SV=1	25	2	2	2	106	12.5	8.63	67	124.7	106.8	108.4	92.6	73.1	94.5	113.3	86.7333	UP	1.3063	0.0407344
Q9BWH2	FUNDC2	FUN14 domain-containing protein 2 OS=Homo sapiens OX=9606 GN=FUNDC2 PE=1 SV=2	13	3	3	3	189	20.7	9.73	49	114.5	111.2	114.1	83.5	85	91.7	113.267	86.7333	UP	1.30592	0.000624647
P05362	ICAM1	Intercellular adhesion molecule 1 OS=Homo sapiens OX=9606 GN=ICAM1 PE=1 SV=2	30	14	23	14	532	57.8	7.99	589	117.5	110.8	111.2	86.5	88.6	85.3	113.167	86.8	UP	1.30376	0.000374131
Q92805	GOLGA1	Golgin subfamily A member 1 OS=Homo sapiens OX=9606 GN=GOLGA1 PE=1 SV=3	4	2	2	2	767	88.1	5.27	38	119.3	107.9	112.2	92.2	81.5	87	113.133	86.9	UP	1.30188	0.00444711
P08183	ABCB1	ATP-dependent translocase ABCB1 OS=Homo sapiens OX=9606 GN=ABCB1 PE=1 SV=3	1	1	1	1	1280	141.4	9	14	125.6	99.9	113.8	92.3	79	89.4	113.1	86.9	UP	1.3015	0.0362492
Q16610	ECM1	Extracellular matrix protein 1 OS=Homo sapiens OX=9606 GN=ECM1 PE=1 SV=2	16	6	6	6	540	60.6	6.71	101	115.1	111.8	112.4	87.9	85.1	87.8	113.1	86.9333	UP	1.301	4.40034e-05
Q9NX40	OCIAD1	OCIA domain-containing protein 1 OS=Homo sapiens OX=9606 GN=OCIAD1 PE=1 SV=1	23	5	6	5	245	27.6	7.49	148	126.6	104.2	108.2	89.3	79.1	92.7	113	87.0333	UP	1.29835	0.0317046
P07942	LAMB1	Laminin subunit beta-1 OS=Homo sapiens OX=9606 GN=LAMB1 PE=1 SV=2	8	10	13	10	1786	197.9	4.94	304	111.9	111.4	115.5	88.2	84.9	88.1	112.933	87.0667	UP	1.29709	0.00010527
Q9Y2Y0	ARL2BP	ADP-ribosylation factor-like protein 2-binding protein OS=Homo sapiens OX=9606 GN=ARL2BP PE=1 SV=1	17	2	4	2	163	18.8	4.35	117	114.5	112.5	111.8	84.8	88	88.4	112.933	87.0667	UP	1.29709	5.01011e-05
Q15434	RBMS2	RNA-binding motif, single-stranded-interacting protein 2 OS=Homo sapiens OX=9606 GN=RBMS2 PE=1 SV=1	15	5	8	3	407	43.9	9.07	189	120.3	112.6	105.8	84.9	85.4	90.9	112.9	87.0667	UP	1.29671	0.00497395
P80303	NUCB2	Nucleobindin-2 OS=Homo sapiens OX=9606 GN=NUCB2 PE=1 SV=3	22	8	12	8	420	50.2	5.12	194	118.8	112.6	107.4	84.5	89.5	87.3	112.933	87.1	UP	1.29659	0.00199455
O75503	CLN5	Ceroid-lipofuscinosis neuronal protein 5 OS=Homo sapiens OX=9606 GN=CLN5 PE=1 SV=2	9	2	2	2	358	41.5	7.4	54	126.3	106.4	106	84.8	91.2	85.3	112.9	87.1	UP	1.29621	0.0211861
O14933	UBE2L6	Ubiquitin/ISG15-conjugating enzyme E2 L6 OS=Homo sapiens OX=9606 GN=UBE2L6 PE=1 SV=4	10	1	2	1	153	17.8	7.88	106	123.7	101.7	113.2	92.3	87.5	81.6	112.867	87.1333	UP	1.29533	0.0219338
P09104	ENO2	Gamma-enolase OS=Homo sapiens OX=9606 GN=ENO2 PE=1 SV=3	65	18	72	15	434	47.2	5.03	2460	115.5	109.9	113	84.7	92.3	84.6	112.8	87.2	UP	1.29358	0.001063
P54803	GALC	Galactocerebrosidase OS=Homo sapiens OX=9606 GN=GALC PE=1 SV=3	9	6	8	6	685	77	6.64	78	119.8	111.5	106.9	90.3	87.5	84	112.733	87.2667	UP	1.29183	0.00370787
Q9Y4G8	RAPGEF2	Rap guanine nucleotide exchange factor 2 OS=Homo sapiens OX=9606 GN=RAPGEF2 PE=1 SV=1	2	2	3	1	1499	167.3	6.67	90	121.4	109.9	106.8	88.4	88	85.5	112.7	87.3	UP	1.29095	0.00498071
P20339	RAB5A	Ras-related protein Rab-5A OS=Homo sapiens OX=9606 GN=RAB5A PE=1 SV=2	67	9	22	6	215	23.6	8.15	824	111.3	115.1	111.6	80.4	88	93.6	112.667	87.3333	UP	1.29008	0.00322567
P23634	ATP2B4	Plasma membrane calcium-transporting ATPase 4 OS=Homo sapiens OX=9606 GN=ATP2B4 PE=1 SV=2	20	19	30	10	1241	137.8	6.6	865	114.8	111.1	112.1	87.6	92.1	82.3	112.667	87.3333	UP	1.29008	0.00113331
Q6ZXV5	TMTC3	Protein O-mannosyl-transferase TMTC3 OS=Homo sapiens OX=9606 GN=TMTC3 PE=1 SV=2	13	11	13	10	915	103.9	8.87	112	114.6	111.1	112.3	86.7	86.7	88.7	112.667	87.3667	UP	1.28958	3.23935e-05
Q8NBJ4	GOLM1	Golgi membrane protein 1 OS=Homo sapiens OX=9606 GN=GOLM1 PE=1 SV=1	26	10	13	10	401	45.3	4.97	159	121.2	107.5	108.9	87.5	85.7	89.1	112.533	87.4333	UP	1.28708	0.00490961
O75093	SLIT1	Slit homolog 1 protein OS=Homo sapiens OX=9606 GN=SLIT1 PE=2 SV=4	1	1	3	1	1534	167.8	6.57	17	112.6	115.2	109.9	85.2	91.3	85.9	112.567	87.4667	UP	1.28697	0.000520518
Q96K49	TMEM87B	Transmembrane protein 87B OS=Homo sapiens OX=9606 GN=TMEM87B PE=1 SV=1	5	3	3	3	555	63.5	7.44	28	115.6	108.7	113	89	86.7	87	112.433	87.5667	UP	1.28397	0.000312037
Q12841	FSTL1	Follistatin-related protein 1 OS=Homo sapiens OX=9606 GN=FSTL1 PE=1 SV=1	6	2	2	2	308	35	5.52	47	112.2	112.9	112.2	95.5	80.8	86.4	112.433	87.5667	UP	1.28397	0.00440372
P61009	SPCS3	Signal peptidase complex subunit 3 OS=Homo sapiens OX=9606 GN=SPCS3 PE=1 SV=1	22	4	7	4	180	20.3	8.62	128	114.4	113.9	108.8	82.2	90.1	90.7	112.367	87.6667	UP	1.28175	0.00164875
O00469	PLOD2	Procollagen-lysine,2-oxoglutarate 5-dioxygenase 2 OS=Homo sapiens OX=9606 GN=PLOD2 PE=1 SV=2	27	15	20	15	737	84.6	6.71	453	123.9	105.2	107.9	86.6	88.2	88.2	112.333	87.6667	UP	1.28137	0.013593
Q13308	PTK7	Inactive tyrosine-protein kinase 7 OS=Homo sapiens OX=9606 GN=PTK7 PE=1 SV=2	4	3	3	3	1070	118.3	7.09	119	117.1	102.6	117.2	88.9	84.6	89.6	112.3	87.7	UP	1.2805	0.00847634
Q9UII2	ATP5IF1	ATPase inhibitor, mitochondrial OS=Homo sapiens OX=9606 GN=ATP5IF1 PE=1 SV=1	25	5	8	5	106	12.2	9.35	104	112.8	116.2	107.8	82.4	90.4	90.3	112.267	87.7	UP	1.28012	0.00241618
Q00688	FKBP3	Peptidyl-prolyl cis-trans isomerase FKBP3 OS=Homo sapiens OX=9606 GN=FKBP3 PE=1 SV=1	50	12	22	12	224	25.2	9.28	327	115.4	112.3	108.8	83.5	90.5	89.4	112.167	87.8	UP	1.27752	0.00108506
Q5TC84	OGFRL1	Opioid growth factor receptor-like protein 1 OS=Homo sapiens OX=9606 GN=OGFRL1 PE=2 SV=1	17	6	7	6	451	51.2	6.13	57	113.5	110	113	82.4	87.9	93.2	112.167	87.8333	UP	1.27704	0.00181076
Q8IV20	LACC1	Laccase domain-containing protein 1 OS=Homo sapiens OX=9606 GN=LACC1 PE=1 SV=1	5	2	2	2	430	47.7	7.06	59	119.1	108	109.2	86.9	84.6	92.3	112.1	87.9333	UP	1.27483	0.00449505
P15151	PVR	Poliovirus receptor OS=Homo sapiens OX=9606 GN=PVR PE=1 SV=2	12	5	7	5	417	45.3	6.52	129	118.2	109.4	108.3	91.8	77.8	94.5	111.967	88.0333	UP	1.27187	0.0167345
Q9BSR8	YIPF4	Protein YIPF4 OS=Homo sapiens OX=9606 GN=YIPF4 PE=1 SV=1	9	2	3	2	244	27.1	4.65	25	119.7	107.4	108.3	84.6	90.6	89.4	111.8	88.2	UP	1.26757	0.00565467
Q86X83	COMMD2	COMM domain-containing protein 2 OS=Homo sapiens OX=9606 GN=COMMD2 PE=1 SV=2	9	2	2	2	199	22.7	6.73	24	117.2	112.8	105.4	91.3	87.7	85.7	111.8	88.2333	UP	1.26709	0.00348119
Q8NDA8	MROH1	Maestro heat-like repeat-containing protein family member 1 OS=Homo sapiens OX=9606 GN=MROH1 PE=2 SV=3	1	1	2	1	1641	181.1	6.89	35	116.4	105.9	113.1	92.3	88.9	83.5	111.8	88.2333	UP	1.26709	0.00423326
Q8WW59	SPRYD4	SPRY domain-containing protein 4 OS=Homo sapiens OX=9606 GN=SPRYD4 PE=1 SV=2	18	2	3	2	207	23.1	6.93	108	115.5	105.3	114.5	86.4	89.6	88.7	111.767	88.2333	UP	1.26672	0.00224442
Q03518	TAP1	Antigen peptide transporter 1 OS=Homo sapiens OX=9606 GN=TAP1 PE=1 SV=2	20	11	15	11	808	87.2	8.02	346	112	111.3	111.8	87.8	90.5	86.6	111.7	88.3	UP	1.26501	3.71204e-05
Q6UWE0	LRSAM1	E3 ubiquitin-protein ligase LRSAM1 OS=Homo sapiens OX=9606 GN=LRSAM1 PE=1 SV=1	18	10	11	10	723	83.5	5.94	284	119	107.3	108.8	89.2	86.6	89.1	111.7	88.3	UP	1.26501	0.00343679
Q9H7C9	AAMDC	Mth938 domain-containing protein OS=Homo sapiens OX=9606 GN=AAMDC PE=1 SV=1	38	4	4	4	122	13.3	8.46	89	115.6	110.1	109.4	87.5	89.6	87.8	111.7	88.3	UP	1.26501	0.000347182
Q8TBQ9	TMEM167A	Protein kish-A OS=Homo sapiens OX=9606 GN=TMEM167A PE=1 SV=1	13	1	1	1	72	8.1	8.95	37	116.9	110.4	107.5	86.1	89.7	89.3	111.6	88.3667	UP	1.26292	0.00150426
P35237	SERPINB6	Serpin B6 OS=Homo sapiens OX=9606 GN=SERPINB6 PE=1 SV=3	66	18	34	17	376	42.6	5.27	948	115	110.9	108.9	87.2	91.3	86.7	111.6	88.4	UP	1.26244	0.000554803
Q92520	FAM3C	Protein FAM3C OS=Homo sapiens OX=9606 GN=FAM3C PE=1 SV=1	50	9	13	9	227	24.7	8.29	383	113.3	111.4	110	88.4	90.5	86.3	111.567	88.4	UP	1.26207	0.000115005
Q96SW2	CRBN	Protein cereblon OS=Homo sapiens OX=9606 GN=CRBN PE=1 SV=1	14	5	5	5	442	50.5	5.63	76	116.1	107.7	110.9	84.5	89.4	91.4	111.567	88.4333	UP	1.26159	0.00192536
P21589	NT5E	5'-nucleotidase OS=Homo sapiens OX=9606 GN=NT5E PE=1 SV=1	51	25	49	25	574	63.3	7.03	1218	116.7	111	107	90.5	90.2	84.6	111.567	88.4333	UP	1.26159	0.00245459
Q9P2E9	RRBP1	Ribosome-binding protein 1 OS=Homo sapiens OX=9606 GN=RRBP1 PE=1 SV=5	66	75	112	74	1410	152.4	8.6	2078	117.1	108.7	108.9	84.6	86.5	94.2	111.567	88.4333	UP	1.26159	0.00457943
Q9UBR2	CTSZ	Cathepsin Z OS=Homo sapiens OX=9606 GN=CTSZ PE=1 SV=1	24	6	7	6	303	33.8	7.11	67	117.9	108.7	108	89.2	90.6	85.5	111.533	88.4333	UP	1.26121	0.00283044
P52943	CRIP2	Cysteine-rich protein 2 OS=Homo sapiens OX=9606 GN=CRIP2 PE=1 SV=1	36	4	4	4	208	22.5	8.72	151	114.1	110.8	109.8	85	93.5	86.9	111.567	88.4667	UP	1.26112	0.00131924
Q7Z3E5	ARMC9	LisH domain-containing protein ARMC9 OS=Homo sapiens OX=9606 GN=ARMC9 PE=1 SV=3	12	8	9	8	818	91.8	6.2	163	113.7	105	115.9	93.3	83.7	88.4	111.533	88.4667	UP	1.26074	0.00598042
Q9Y2H6	FNDC3A	Fibronectin type-III domain-containing protein 3A OS=Homo sapiens OX=9606 GN=FNDC3A PE=1 SV=4	19	15	16	15	1198	131.8	6.71	268	111.8	111.4	111	92.3	86.8	86.7	111.4	88.6	UP	1.25734	0.000256814
Q15847	ADIRF	Adipogenesis regulatory factor OS=Homo sapiens OX=9606 GN=ADIRF PE=1 SV=1	79	4	6	4	76	7.9	5.31	343	111.6	107.9	114.7	85	94.5	86.3	111.4	88.6	UP	1.25734	0.00306777
Q92844	TANK	TRAF family member-associated NF-kappa-B activator OS=Homo sapiens OX=9606 GN=TANK PE=1 SV=2	22	6	7	6	425	47.8	5.68	81	113.4	108.6	112.1	84.6	90	91.2	111.367	88.6	UP	1.25696	0.000787813
L0R6Q1	SLC35A4	SLC35A4 upstream open reading frame protein OS=Homo sapiens OX=9606 GN=SLC35A4 PE=3 SV=1	40	3	4	3	103	11.1	8.1	112	122.6	106.9	104.5	94.6	84.2	87.1	111.333	88.6333	UP	1.25611	0.0246629
Q86W25	NLRP13	NACHT, LRR and PYD domains-containing protein 13 OS=Homo sapiens OX=9606 GN=NLRP13 PE=2 SV=2	1	1	4	1	1043	118.8	5.66	51	122.8	104	107.1	96.2	78.1	91.6	111.3	88.6333	UP	1.25574	0.0465129
O75674	TOM1L1	TOM1-like protein 1 OS=Homo sapiens OX=9606 GN=TOM1L1 PE=1 SV=2	8	2	2	2	476	53	5.24	123	111.2	112.2	110.6	84.7	90.6	90.8	111.333	88.7	UP	1.25517	0.000385942
Q9NW68	BSDC1	BSD domain-containing protein 1 OS=Homo sapiens OX=9606 GN=BSDC1 PE=1 SV=1	15	5	5	5	430	47.1	4.49	119	111.8	111	111.2	90.2	87	88.9	111.333	88.7	UP	1.25517	1.91687e-05
P21695	GPD1	Glycerol-3-phosphate dehydrogenase [NAD(+)], cytoplasmic OS=Homo sapiens OX=9606 GN=GPD1 PE=1 SV=4	4	2	3	1	349	37.5	6.18	31	122.1	105	106.8	90.8	87.1	88.2	111.3	88.7	UP	1.25479	0.0150576
Q9BXS4	TMEM59	Transmembrane protein 59 OS=Homo sapiens OX=9606 GN=TMEM59 PE=1 SV=1	7	2	2	2	323	36.2	5.1	67	119.6	109.4	104.9	86.2	88.3	91.7	111.3	88.7333	UP	1.25432	0.00822343
P10321	HLA-C	HLA class I histocompatibility antigen, C alpha chain OS=Homo sapiens OX=9606 GN=HLA-C PE=1 SV=3	33	9	18	4	366	40.6	6.04	487	118.4	107.4	108.1	89	89.4	87.8	111.3	88.7333	UP	1.25432	0.00326491
Q9H4G4	GLIPR2	Golgi-associated plant pathogenesis-related protein 1 OS=Homo sapiens OX=9606 GN=GLIPR2 PE=1 SV=3	19	2	2	2	154	17.2	9.41	55	117.3	107.5	109	86	87	93.2	111.267	88.7333	UP	1.25394	0.00401189
Q92820	GGH	Gamma-glutamyl hydrolase OS=Homo sapiens OX=9606 GN=GGH PE=1 SV=2	19	5	6	5	318	35.9	7.11	146	119.3	107.7	106.7	89.3	91.3	85.6	111.233	88.7333	UP	1.25357	0.00677677
Q9UQN3	CHMP2B	Charged multivesicular body protein 2b OS=Homo sapiens OX=9606 GN=CHMP2B PE=1 SV=1	22	5	5	5	213	23.9	8.76	67	108.7	109.8	115.2	86.4	87.3	92.5	111.233	88.7333	UP	1.25357	0.00124191
P04439	HLA-A	HLA class I histocompatibility antigen, A alpha chain OS=Homo sapiens OX=9606 GN=HLA-A PE=1 SV=2	26	7	19	3	365	40.8	6	336	120	105.5	108.2	91.9	86.2	88.1	111.233	88.7333	UP	1.25357	0.00910484
Q8TED1	GPX8	Probable glutathione peroxidase 8 OS=Homo sapiens OX=9606 GN=GPX8 PE=1 SV=2	9	2	2	2	209	23.9	9.35	38	119.2	107.1	107.4	86.6	89.8	89.9	111.233	88.7667	UP	1.2531	0.00553882
P63218	GNG5	Guanine nucleotide-binding protein G(I)/G(S)/G(O) subunit gamma-5 OS=Homo sapiens OX=9606 GN=GNG5 PE=1 SV=3	24	2	4	2	68	7.3	9.85	79	114.7	107.7	111.3	83	98.1	85.2	111.233	88.7667	UP	1.2531	0.0118402
P22694	PRKACB	cAMP-dependent protein kinase catalytic subunit beta OS=Homo sapiens OX=9606 GN=PRKACB PE=1 SV=2	35	10	12	3	351	40.6	8.78	262	114.1	112.5	106.7	86.2	92	88.5	111.1	88.9	UP	1.24972	0.00138869
Q9UJ83	HACL1	2-hydroxyacyl-CoA lyase 1 OS=Homo sapiens OX=9606 GN=HACL1 PE=1 SV=2	11	5	6	5	578	63.7	7.36	139	110	111.9	111.3	91.3	85.6	89.8	111.067	88.9	UP	1.24934	0.000247454
Q9Y624	F11R	Junctional adhesion molecule A OS=Homo sapiens OX=9606 GN=F11R PE=1 SV=1	21	5	7	5	299	32.6	7.9	143	113.6	109.3	110.2	86.5	91.9	88.4	111.033	88.9333	UP	1.2485	0.000422383
P46934	NEDD4	E3 ubiquitin-protein ligase NEDD4 OS=Homo sapiens OX=9606 GN=NEDD4 PE=1 SV=4	8	10	14	8	1319	149	6.58	239	110	110.4	112.7	84.5	89.3	93.1	111.033	88.9667	UP	1.24803	0.00109854
Q9Y394	DHRS7	Dehydrogenase/reductase SDR family member 7 OS=Homo sapiens OX=9606 GN=DHRS7 PE=1 SV=1	38	10	12	10	339	38.3	8.32	210	113.3	111.2	108.5	84.5	89.6	92.9	111	89	UP	1.24719	0.00143838
Q96HD1	CRELD1	Protein disulfide isomerase CRELD1 OS=Homo sapiens OX=9606 GN=CRELD1 PE=1 SV=3	15	5	5	5	420	45.4	4.87	90	116.8	105.5	110.7	89.5	87.4	90.1	111	89	UP	1.24719	0.00283301
Q9Y2G5	POFUT2	GDP-fucose protein O-fucosyltransferase 2 OS=Homo sapiens OX=9606 GN=POFUT2 PE=1 SV=3	21	8	9	8	429	49.9	6.6	179	113.2	110.5	109.3	86.1	92.1	88.9	111	89.0333	UP	1.24672	0.000456448
Q9NVM4	PRMT7	Protein arginine N-methyltransferase 7 OS=Homo sapiens OX=9606 GN=PRMT7 PE=1 SV=1	3	2	2	2	692	78.4	5.57	31	110.7	108	114.1	89.7	88.1	89.3	110.933	89.0333	UP	1.24598	0.000278856
O95166	GABARAP	Gamma-aminobutyric acid receptor-associated protein OS=Homo sapiens OX=9606 GN=GABARAP PE=1 SV=1	15	2	3	1	117	13.9	8.79	42	116.5	110.7	105.7	85.9	89.3	92	110.967	89.0667	UP	1.24588	0.00363472
Q96RF0	SNX18	Sorting nexin-18 OS=Homo sapiens OX=9606 GN=SNX18 PE=1 SV=2	5	3	4	3	628	68.9	5.68	106	118.2	106.3	108.1	92.1	88.3	86.9	110.867	89.1	UP	1.24429	0.00561676
Q96LJ7	DHRS1	Dehydrogenase/reductase SDR family member 1 OS=Homo sapiens OX=9606 GN=DHRS1 PE=1 SV=1	19	4	5	4	313	33.9	7.83	150	118.7	107.3	106.6	94.6	86.3	86.5	110.867	89.1333	UP	1.24383	0.0104492
Q8NBM8	PCYOX1L	Prenylcysteine oxidase-like OS=Homo sapiens OX=9606 GN=PCYOX1L PE=1 SV=2	5	3	3	3	494	54.6	7.31	51	118.1	102.7	111.6	92.3	88.5	86.7	110.8	89.1667	UP	1.24262	0.0104509
P09914	IFIT1	Interferon-induced protein with tetratricopeptide repeats 1 OS=Homo sapiens OX=9606 GN=IFIT1 PE=1 SV=2	10	4	5	4	478	55.3	7.2	115	118.5	105.6	108.3	86.8	92	88.8	110.8	89.2	UP	1.24215	0.00683494
P10619	CTSA	Lysosomal protective protein OS=Homo sapiens OX=9606 GN=CTSA PE=1 SV=2	10	5	7	5	480	54.4	6.61	143	120.8	108.3	103.3	91.3	89.1	87.2	110.8	89.2	UP	1.24215	0.0155141
Q9Y6A9	SPCS1	Signal peptidase complex subunit 1 OS=Homo sapiens OX=9606 GN=SPCS1 PE=1 SV=5	10	2	4	2	169	18.3	8.72	58	111.4	113.6	107.4	85.5	90.8	91.4	110.8	89.2333	UP	1.24169	0.00116895
P09493	TPM1	Tropomyosin alpha-1 chain OS=Homo sapiens OX=9606 GN=TPM1 PE=1 SV=2	37	17	28	8	284	32.7	4.74	258	115.6	110.9	105.7	89.8	90.1	87.8	110.733	89.2333	UP	1.24094	0.00188105
O94808	GFPT2	Glutamine--fructose-6-phosphate aminotransferase [isomerizing] 2 OS=Homo sapiens OX=9606 GN=GFPT2 PE=1 SV=3	51	28	43	20	682	76.9	7.37	948	118.6	106.6	107.1	88.5	88.8	90.5	110.767	89.2667	UP	1.24085	0.00562567
Q9GZM5	YIPF3	Protein YIPF3 OS=Homo sapiens OX=9606 GN=YIPF3 PE=1 SV=1	10	4	5	4	350	38.2	5.76	93	116.9	107.4	107.9	88.6	86.4	92.8	110.733	89.2667	UP	1.24048	0.00402349
Q6P1Q0	LETMD1	LETM1 domain-containing protein 1 OS=Homo sapiens OX=9606 GN=LETMD1 PE=1 SV=1	7	2	2	2	360	41.8	10.32	64	113.4	110.2	108.6	86.7	84	97.1	110.733	89.2667	UP	1.24048	0.00713864
P31947	SFN	14-3-3 protein sigma OS=Homo sapiens OX=9606 GN=SFN PE=1 SV=1	75	21	67	16	248	27.8	4.74	1189	112.1	112.1	108	89.4	89.1	89.3	110.733	89.2667	UP	1.24048	9.67519e-05
Q9H2C0	GAN	Gigaxonin OS=Homo sapiens OX=9606 GN=GAN PE=1 SV=1	19	8	10	8	597	67.6	5.85	205	110.5	109.8	111.8	92.3	85.6	90	110.7	89.3	UP	1.23964	0.000476688
Q9Y281	CFL2	Cofilin-2 OS=Homo sapiens OX=9606 GN=CFL2 PE=1 SV=1	81	15	38	10	166	18.7	7.88	897	113.5	110.5	108.1	89.4	89.8	88.7	110.7	89.3	UP	1.23964	0.000178399
Q9Y6D6	ARFGEF1	Brefeldin A-inhibited guanine nucleotide-exchange protein 1 OS=Homo sapiens OX=9606 GN=ARFGEF1 PE=1 SV=2	9	14	18	5	1849	208.6	5.85	300	104.2	102.9	125	86.4	91.4	90.2	110.7	89.3333	UP	1.23918	0.0432326
Q92599	SEPTIN8	Septin-8 OS=Homo sapiens OX=9606 GN=SEPTIN8 PE=1 SV=4	19	8	11	4	483	55.7	6.28	220	107.2	114.7	110.1	90.1	91.7	86.2	110.667	89.3333	UP	1.23881	0.00144099
Q8NAN2	MIGA1	Mitoguardin 1 OS=Homo sapiens OX=9606 GN=MIGA1 PE=1 SV=1	13	6	6	6	632	71	5.63	115	109.9	100.8	121	90	88.2	90	110.567	89.4	UP	1.23676	0.0226573
P45973	CBX5	Chromobox protein homolog 5 OS=Homo sapiens OX=9606 GN=CBX5 PE=1 SV=1	47	10	16	9	191	22.2	5.86	314	111.4	110.5	109.9	89.6	89.5	89.2	110.6	89.4333	UP	1.23668	1.24558e-06
Q15165	PON2	Serum paraoxonase/arylesterase 2 OS=Homo sapiens OX=9606 GN=PON2 PE=1 SV=4	5	1	1	1	354	39.4	5.6	60	112	107.4	112.3	95.3	80	93	110.567	89.4333	UP	1.2363	0.0135897
P13747	HLA-E	HLA class I histocompatibility antigen, alpha chain E OS=Homo sapiens OX=9606 GN=HLA-E PE=1 SV=4	11	3	5	1	358	40	5.83	119	111.4	106.5	113.6	91	91	86.4	110.5	89.4667	UP	1.2351	0.00126689
Q9HBL7	PLGRKT	Plasminogen receptor (KT) OS=Homo sapiens OX=9606 GN=PLGRKT PE=1 SV=1	16	2	2	2	147	17.2	9.58	32	111.6	112	107.9	93	90.7	84.8	110.5	89.5	UP	1.23464	0.00162091
P61769	B2M	Beta-2-microglobulin OS=Homo sapiens OX=9606 GN=B2M PE=1 SV=1	41	4	7	4	119	13.7	6.52	155	117.1	105.7	108.7	90.1	88.8	89.6	110.5	89.5	UP	1.23464	0.00361538
Q9BQS8	FYCO1	FYVE and coiled-coil domain-containing protein 1 OS=Homo sapiens OX=9606 GN=FYCO1 PE=1 SV=3	12	14	18	14	1478	166.9	4.92	485	114.9	107.6	108.8	92.2	88.1	88.4	110.433	89.5667	UP	1.23297	0.00134078
P55085	F2RL1	Proteinase-activated receptor 2 OS=Homo sapiens OX=9606 GN=F2RL1 PE=1 SV=1	2	1	1	1	397	44.1	9.61	47	112.9	105.6	112.8	92.9	88.7	87.1	110.433	89.5667	UP	1.23297	0.0021673
Q16611	BAK1	Bcl-2 homologous antagonist/killer OS=Homo sapiens OX=9606 GN=BAK1 PE=1 SV=1	17	2	3	2	211	23.4	6.01	114	106.1	110.3	114.9	86.3	89.4	93.1	110.433	89.6	UP	1.23251	0.00291524
P53701	HCCS	Cytochrome c-type heme lyase OS=Homo sapiens OX=9606 GN=HCCS PE=1 SV=1	24	6	7	6	268	30.6	6.68	126	113.1	108.8	109.1	90.1	89.3	89.6	110.333	89.6667	UP	1.23048	0.000124501
Q8TCD1	C18orf32	UPF0729 protein C18orf32 OS=Homo sapiens OX=9606 GN=C18orf32 PE=3 SV=1	25	2	2	2	76	8.7	9.13	49	110.5	113.8	106.7	87.8	90.3	90.9	110.333	89.6667	UP	1.23048	0.000794073
P80723	BASP1	Brain acid soluble protein 1 OS=Homo sapiens OX=9606 GN=BASP1 PE=1 SV=2	90	18	40	18	227	22.7	4.63	993	112.2	112.3	106.4	88.1	94.4	86.5	110.3	89.6667	UP	1.23011	0.00265027
Q9Y282	ERGIC3	Endoplasmic reticulum-Golgi intermediate compartment protein 3 OS=Homo sapiens OX=9606 GN=ERGIC3 PE=1 SV=1	24	9	9	9	383	43.2	6.06	97	109.3	108.5	113.1	88	93.1	87.9	110.3	89.6667	UP	1.23011	0.000755134
O95479	H6PD	GDH/6PGL endoplasmic bifunctional protein OS=Homo sapiens OX=9606 GN=H6PD PE=1 SV=2	7	4	4	4	791	88.8	7.3	57	115.5	109.1	106.4	86.9	94.7	87.5	110.333	89.7	UP	1.23003	0.00498242
Q96PM5	RCHY1	RING finger and CHY zinc finger domain-containing protein 1 OS=Homo sapiens OX=9606 GN=RCHY1 PE=1 SV=1	8	2	2	2	261	30.1	6.71	21	114.7	107.7	108.5	88.8	87.1	93.2	110.3	89.7	UP	1.22965	0.00197699
Q9UHN6	CEMIP2	Cell surface hyaluronidase OS=Homo sapiens OX=9606 GN=CEMIP2 PE=1 SV=1	4	5	5	5	1383	154.3	8.15	43	104.7	105.6	120.6	94.4	83.1	91.6	110.3	89.7	UP	1.22965	0.0289457
P09467	FBP1	Fructose-1,6-bisphosphatase 1 OS=Homo sapiens OX=9606 GN=FBP1 PE=1 SV=5	21	5	7	5	338	36.8	6.99	73	111.3	111.5	108	92.4	86.5	90.3	110.267	89.7333	UP	1.22883	0.000575682
Q15067	ACOX1	Peroxisomal acyl-coenzyme A oxidase 1 OS=Homo sapiens OX=9606 GN=ACOX1 PE=1 SV=3	16	6	7	6	660	74.4	8.16	304	116.1	108.3	106.3	88.9	90.4	89.9	110.233	89.7333	UP	1.22845	0.0024652
Q9BZM5	ULBP2	UL16-binding protein 2 OS=Homo sapiens OX=9606 GN=ULBP2 PE=1 SV=1	22	5	7	5	246	27.4	7.3	99	116.3	107	107.4	89.6	87.3	92.4	110.233	89.7667	UP	1.228	0.00373283
P30622	CLIP1	CAP-Gly domain-containing linker protein 1 OS=Homo sapiens OX=9606 GN=CLIP1 PE=1 SV=2	26	38	43	35	1438	162.1	5.36	864	111.9	109.2	109.6	88	88.1	93.2	110.233	89.7667	UP	1.228	0.000431535
P32456	GBP2	Guanylate-binding protein 2 OS=Homo sapiens OX=9606 GN=GBP2 PE=1 SV=3	40	22	32	19	591	67.2	5.71	680	115	109.3	106.4	83.2	100.1	86	110.233	89.7667	UP	1.228	0.0243602
P08134	RHOC	Rho-related GTP-binding protein RhoC OS=Homo sapiens OX=9606 GN=RHOC PE=1 SV=1	69	11	29	2	193	22	6.58	731	111.2	112.7	106.7	90.4	91.4	87.5	110.2	89.7667	UP	1.22763	0.000682807
Q9P0R6	GSKIP	GSK3B-interacting protein OS=Homo sapiens OX=9606 GN=GSKIP PE=1 SV=2	17	2	2	2	139	15.6	4.48	93	112.3	108.5	109.9	90.9	86.2	92.3	110.233	89.8	UP	1.22754	0.00068757
O60831	PRAF2	PRA1 family protein 2 OS=Homo sapiens OX=9606 GN=PRAF2 PE=1 SV=1	16	2	3	2	178	19.2	9.19	105	109.4	113.2	108	86.5	91.3	91.6	110.2	89.8	UP	1.22717	0.000845587
Q9UI15	TAGLN3	Transgelin-3 OS=Homo sapiens OX=9606 GN=TAGLN3 PE=1 SV=2	14	2	4	1	199	22.5	7.33	158	110.9	109.5	110.2	92.2	95.4	81.8	110.2	89.8	UP	1.22717	0.00778725
P42345	MTOR	Serine/threonine-protein kinase mTOR OS=Homo sapiens OX=9606 GN=MTOR PE=1 SV=1	10	22	23	22	2549	288.7	7.17	272	110.3	108.7	111.5	88.4	88.9	92.1	110.167	89.8	UP	1.2268	0.000135261
Q08722	CD47	Leukocyte surface antigen CD47 OS=Homo sapiens OX=9606 GN=CD47 PE=1 SV=1	11	4	8	4	323	35.2	7.21	87	116.1	107.8	106.6	90.8	92.8	85.9	110.167	89.8333	UP	1.22635	0.00494999
Q12846	STX4	Syntaxin-4 OS=Homo sapiens OX=9606 GN=STX4 PE=1 SV=2	15	3	3	3	297	34.2	6.28	70	111.9	110.8	107.7	87.7	92.1	89.8	110.133	89.8667	UP	1.22552	0.000345079
P17813	ENG	Endoglin OS=Homo sapiens OX=9606 GN=ENG PE=1 SV=2	14	7	8	7	658	70.5	6.61	180	118.8	104.5	106.9	89.9	91.7	88.1	110.067	89.9	UP	1.22432	0.0113317
Q9UK22	FBXO2	F-box only protein 2 OS=Homo sapiens OX=9606 GN=FBXO2 PE=1 SV=2	18	3	4	3	296	33.3	4.37	90	110.5	108.8	110.9	88.3	88.7	92.9	110.067	89.9667	UP	1.22342	0.000234409
Q969E2	SCAMP4	Secretory carrier-associated membrane protein 4 OS=Homo sapiens OX=9606 GN=SCAMP4 PE=1 SV=1	28	3	5	3	229	25.7	8.82	116	111.9	112.3	106	90.7	97.4	81.8	110.067	89.9667	UP	1.22342	0.0154036
Q9Y3R5	DOP1B	Protein dopey-2 OS=Homo sapiens OX=9606 GN=DOP1B PE=1 SV=5	1	2	2	2	2298	258.1	6.29	100	110.7	111.2	108.2	85.6	95.7	88.6	110.033	89.9667	UP	1.22305	0.00305982
O95716	RAB3D	Ras-related protein Rab-3D OS=Homo sapiens OX=9606 GN=RAB3D PE=1 SV=1	33	6	10	2	219	24.3	4.93	213	114.6	109.5	106	90.3	90.8	88.8	110.033	89.9667	UP	1.22305	0.00144796
Q13637	RAB32	Ras-related protein Rab-32 OS=Homo sapiens OX=9606 GN=RAB32 PE=1 SV=3	48	9	16	8	225	25	6.54	476	110.4	108.2	111.4	91.6	88	90.3	110	89.9667	UP	1.22268	0.000144338
Q03519	TAP2	Antigen peptide transporter 2 OS=Homo sapiens OX=9606 GN=TAP2 PE=1 SV=1	17	10	11	9	686	75.6	8.02	157	112.4	110.1	107.6	91.1	90.5	88.4	110.033	90	UP	1.22259	0.000239687
Q9P2C4	TMEM181	Transmembrane protein 181 OS=Homo sapiens OX=9606 GN=TMEM181 PE=1 SV=2	1	1	1	1	612	69.3	8.92	17	113.9	109.7	106.5	86.1	94.1	89.8	110.033	90	UP	1.22259	0.00314016
Q15155	NOMO1	Nodal modulator 1 OS=Homo sapiens OX=9606 GN=NOMO1 PE=1 SV=5	31	25	33	1	1222	134.2	5.81	832	112.4	109.1	108.5	88.4	88.5	93.1	110	90	UP	1.22222	0.000528047
O95786	DDX58	Antiviral innate immune response receptor RIG-I OS=Homo sapiens OX=9606 GN=DDX58 PE=1 SV=2	11	9	9	9	925	106.5	6.4	207	118.4	102.8	108.7	92.3	89.7	88	109.967	90	UP	1.22185	0.0133332
O43278	SPINT1	Kunitz-type protease inhibitor 1 OS=Homo sapiens OX=9606 GN=SPINT1 PE=1 SV=2	4	2	2	2	529	58.4	6.29	27	120.4	102.7	106.9	89.5	93.9	86.7	110	90.0333	UP	1.22177	0.0253296
Q01484	ANK2	Ankyrin-2 OS=Homo sapiens OX=9606 GN=ANK2 PE=1 SV=4	2	5	6	4	3957	433.4	5.14	174	110.5	105.5	114	93	84.4	92.7	110	90.0333	UP	1.22177	0.00595859
Q99584	S100A13	Protein S100-A13 OS=Homo sapiens OX=9606 GN=S100A13 PE=1 SV=1	49	6	14	6	98	11.5	6.16	171	114.4	109.2	106.3	88.6	93.4	88.1	109.967	90.0333	UP	1.2214	0.00237773
Q9NYM9	BET1L	BET1-like protein OS=Homo sapiens OX=9606 GN=BET1L PE=1 SV=1	44	3	3	3	111	12.4	8.16	90	116.1	105.4	108.3	88.3	87.4	94.5	109.933	90.0667	UP	1.22058	0.0069945
Q6L8Q7	PDE12	2',5'-phosphodiesterase 12 OS=Homo sapiens OX=9606 GN=PDE12 PE=1 SV=2	33	13	19	13	609	67.3	6.57	667	111.7	108.7	109.4	88.7	91.1	90.4	109.933	90.0667	UP	1.22058	6.65185e-05
Q16698	DECR1	2,4-dienoyl-CoA reductase, mitochondrial OS=Homo sapiens OX=9606 GN=DECR1 PE=1 SV=1	44	13	20	13	335	36	9.28	419	111.5	108.1	110.1	90	92	88.2	109.9	90.0667	UP	1.22021	0.00017731
Q9NQY0	BIN3	Bridging integrator 3 OS=Homo sapiens OX=9606 GN=BIN3 PE=1 SV=1	18	5	6	5	253	29.6	7.47	92	112	106.3	111.4	88.9	88.4	93	109.9	90.1	UP	1.21976	0.00103846
Q6NXT6	TAPT1	Transmembrane anterior posterior transformation protein 1 homolog OS=Homo sapiens OX=9606 GN=TAPT1 PE=1 SV=1	2	1	1	1	567	64.2	8.28	14	114.8	107.9	106.9	88.6	90.7	91.1	109.867	90.1333	UP	1.21893	0.00162054
P08648	ITGA5	Integrin alpha-5 OS=Homo sapiens OX=9606 GN=ITGA5 PE=1 SV=2	18	15	20	15	1049	114.5	5.77	482	115.5	107.6	106.6	93.7	90.9	85.9	109.9	90.1667	UP	1.21885	0.00551982
P54852	EMP3	Epithelial membrane protein 3 OS=Homo sapiens OX=9606 GN=EMP3 PE=1 SV=1	18	2	4	2	163	18.4	7.96	186	115.3	111.4	102.8	89.1	88.8	92.5	109.833	90.1333	UP	1.21857	0.00708382
O14966	RAB29	Ras-related protein Rab-7L1 OS=Homo sapiens OX=9606 GN=RAB29 PE=1 SV=1	38	6	7	5	203	23.1	7.18	215	108.7	107.1	113.8	89.6	89.6	91.3	109.867	90.1667	UP	1.21848	0.000716938
Q9UBR5	CKLF	Chemokine-like factor OS=Homo sapiens OX=9606 GN=CKLF PE=2 SV=1	7	1	1	1	152	17.2	9.32	34	117.3	113.5	98.7	90	93.6	86.9	109.833	90.1667	UP	1.21811	0.0304846
Q5NDL2	EOGT	EGF domain-specific O-linked N-acetylglucosamine transferase OS=Homo sapiens OX=9606 GN=EOGT PE=1 SV=1	10	5	6	5	527	62	7.05	81	108.4	111.7	109.4	91.9	87.1	91.5	109.833	90.1667	UP	1.21811	0.000417608
Q15005	SPCS2	Signal peptidase complex subunit 2 OS=Homo sapiens OX=9606 GN=SPCS2 PE=1 SV=3	44	12	16	12	226	25	8.47	281	108.6	111.3	109.5	88.6	90.3	91.7	109.8	90.2	UP	1.21729	8.14883e-05
Q9NZ45	CISD1	CDGSH iron-sulfur domain-containing protein 1 OS=Homo sapiens OX=9606 GN=CISD1 PE=1 SV=1	44	5	7	5	108	12.2	9.09	190	116.2	106.1	107.1	89.6	95.5	85.5	109.8	90.2	UP	1.21729	0.0106029
O95297	MPZL1	Myelin protein zero-like protein 1 OS=Homo sapiens OX=9606 GN=MPZL1 PE=1 SV=1	13	4	5	4	269	29.1	8.72	125	118.8	104.4	106.2	90.3	82.2	98.1	109.8	90.2	UP	1.21729	0.0384317
Q9Y2Q9	MRPS28	28S ribosomal protein S28, mitochondrial OS=Homo sapiens OX=9606 GN=MRPS28 PE=1 SV=1	31	4	5	4	187	20.8	9.1	94	113.3	109.8	106.3	92.6	88	90.1	109.8	90.2333	UP	1.21685	0.00126928
O43169	CYB5B	Cytochrome b5 type B OS=Homo sapiens OX=9606 GN=CYB5B PE=1 SV=3	70	7	9	7	150	16.7	4.97	263	112.8	110.4	106.2	93.3	85.4	92	109.8	90.2333	UP	1.21685	0.00327874
Q15629	TRAM1	Translocating chain-associated membrane protein 1 OS=Homo sapiens OX=9606 GN=TRAM1 PE=1 SV=3	12	4	5	4	374	43	9.63	114	110.7	113.1	105.5	89.7	89.5	91.5	109.767	90.2333	UP	1.21648	0.00111013
Q9NVV0	TMEM38B	Trimeric intracellular cation channel type B OS=Homo sapiens OX=9606 GN=TMEM38B PE=1 SV=1	13	3	3	3	291	32.5	9.06	74	111	110.4	107.8	86.1	89.5	95.2	109.733	90.2667	UP	1.21566	0.00234221
Q9NRX4	PHPT1	14 kDa phosphohistidine phosphatase OS=Homo sapiens OX=9606 GN=PHPT1 PE=1 SV=1	59	7	10	7	125	13.8	6.07	255	112.6	108.9	107.6	87.1	93.5	90.3	109.7	90.3	UP	1.21484	0.00122958
P07203	GPX1	Glutathione peroxidase 1 OS=Homo sapiens OX=9606 GN=GPX1 PE=1 SV=4	15	2	2	2	203	22.1	6.55	80	109.5	109.4	110.2	95.2	88.8	87	109.7	90.3333	UP	1.21439	0.00149799
Q1KMD3	HNRNPUL2	Heterogeneous nuclear ribonucleoprotein U-like protein 2 OS=Homo sapiens OX=9606 GN=HNRNPUL2 PE=1 SV=1	40	24	41	24	747	85.1	4.91	730	110.2	109.4	109.5	88.2	90.4	92.4	109.7	90.3333	UP	1.21439	9.77419e-05
O43657	TSPAN6	Tetraspanin-6 OS=Homo sapiens OX=9606 GN=TSPAN6 PE=1 SV=1	10	2	2	2	245	27.5	8.1	35	114.3	108.5	106.2	89.3	85.5	96.2	109.667	90.3333	UP	1.21402	0.00808767
Q96CD0	FBXL8	F-box/LRR-repeat protein 8 OS=Homo sapiens OX=9606 GN=FBXL8 PE=1 SV=1	7	2	2	2	374	40.5	7.31	26	112.3	105.3	111.3	86.1	96	88.9	109.633	90.3333	UP	1.21365	0.00625105
Q13753	LAMC2	Laminin subunit gamma-2 OS=Homo sapiens OX=9606 GN=LAMC2 PE=1 SV=2	3	3	3	3	1193	130.9	6.19	29	113.5	110.3	105.1	93.6	88.3	89.2	109.633	90.3667	UP	1.21321	0.00282098
Q5VT79	ANXA8L1	Annexin A8-like protein 1 OS=Homo sapiens OX=9606 GN=ANXA8L1 PE=2 SV=2	7	2	2	2	327	36.9	5.78	67	111.4	100.5	117	87	91.9	92.2	109.633	90.3667	UP	1.21321	0.0198391
P49459	UBE2A	Ubiquitin-conjugating enzyme E2 A OS=Homo sapiens OX=9606 GN=UBE2A PE=1 SV=2	11	1	2	1	152	17.3	5.15	48	108.5	109.7	110.5	91.9	87.9	91.5	109.567	90.4333	UP	1.21157	0.00016528
Q7Z5G4	GOLGA7	Golgin subfamily A member 7 OS=Homo sapiens OX=9606 GN=GOLGA7 PE=1 SV=2	17	2	2	2	137	15.8	7.05	79	117	109.4	102.3	88.5	87.1	95.7	109.567	90.4333	UP	1.21157	0.0188088
P01889	HLA-B	HLA class I histocompatibility antigen, B alpha chain OS=Homo sapiens OX=9606 GN=HLA-B PE=1 SV=3	35	9	20	3	362	40.4	5.85	444	116.4	104.9	107.3	91.2	90.2	90	109.533	90.4667	UP	1.21076	0.00564185
O00339	MATN2	Matrilin-2 OS=Homo sapiens OX=9606 GN=MATN2 PE=1 SV=4	4	3	3	3	956	106.8	6.27	60	111.3	107.8	109.5	93.5	92.2	85.7	109.533	90.4667	UP	1.21076	0.0018829
P07311	ACYP1	Acylphosphatase-1 OS=Homo sapiens OX=9606 GN=ACYP1 PE=1 SV=2	60	6	9	6	99	11.3	9.31	161	110.4	109.9	108.2	86.2	93.2	92.1	109.5	90.5	UP	1.20994	0.00111999
Q96RQ1	ERGIC2	Endoplasmic reticulum-Golgi intermediate compartment protein 2 OS=Homo sapiens OX=9606 GN=ERGIC2 PE=1 SV=2	11	4	4	4	377	42.5	6.77	33	113.1	108.5	106.9	90.5	89.3	91.7	109.5	90.5	UP	1.20994	0.000663365
P61916	NPC2	NPC intracellular cholesterol transporter 2 OS=Homo sapiens OX=9606 GN=NPC2 PE=1 SV=1	44	6	15	6	151	16.6	7.65	189	117.6	108.7	102.2	86.9	97.2	87.5	109.5	90.5333	UP	1.2095	0.0272026
O94905	ERLIN2	Erlin-2 OS=Homo sapiens OX=9606 GN=ERLIN2 PE=1 SV=1	49	14	22	11	339	37.8	5.62	702	113.5	109.7	105.2	93	90.6	88.1	109.467	90.5667	UP	1.20869	0.00246119
Q8N668	COMMD1	COMM domain-containing protein 1 OS=Homo sapiens OX=9606 GN=COMMD1 PE=1 SV=1	29	4	4	4	190	21.2	6.2	38	111.5	110	106.8	89	88.6	94.1	109.433	90.5667	UP	1.20832	0.00110374
Q9HAT2	SIAE	Sialate O-acetylesterase OS=Homo sapiens OX=9606 GN=SIAE PE=1 SV=1	3	2	2	2	523	58.3	7.33	45	120.9	101.4	106	91.7	90.7	89.3	109.433	90.5667	UP	1.20832	0.0334185
P16422	EPCAM	Epithelial cell adhesion molecule OS=Homo sapiens OX=9606 GN=EPCAM PE=1 SV=2	9	2	3	2	314	34.9	7.46	116	114.3	107.2	106.8	93.9	86.6	91.2	109.433	90.5667	UP	1.20832	0.00431502
Q01995	TAGLN	Transgelin OS=Homo sapiens OX=9606 GN=TAGLN PE=1 SV=4	42	7	8	7	201	22.6	8.84	112	108.7	107.4	112.2	90.6	90.3	90.9	109.433	90.6	UP	1.20787	0.000199341
Q99523	SORT1	Sortilin OS=Homo sapiens OX=9606 GN=SORT1 PE=1 SV=3	3	2	2	2	831	92	5.74	29	117.9	103.3	106.9	90.3	90.7	90.9	109.367	90.6333	UP	1.20669	0.0130279
Q9NP61	ARFGAP3	ADP-ribosylation factor GTPase-activating protein 3 OS=Homo sapiens OX=9606 GN=ARFGAP3 PE=1 SV=1	21	9	9	9	516	56.9	7.36	248	110.2	108.2	109.7	87.5	90.1	94.3	109.367	90.6333	UP	1.20669	0.000826325
P15514	AREG	Amphiregulin OS=Homo sapiens OX=9606 GN=AREG PE=1 SV=2	4	1	1	1	252	27.9	7.4	21	111	105.2	111.8	89.2	91	91.8	109.333	90.6667	UP	1.20588	0.00108956
Q5K651	SAMD9	Sterile alpha motif domain-containing protein 9 OS=Homo sapiens OX=9606 GN=SAMD9 PE=1 SV=1	8	8	8	8	1589	184.2	7.83	116	112.8	108.1	107.1	90.9	90.2	91	109.333	90.7	UP	1.20544	0.000465678
Q9H0E2	TOLLIP	Toll-interacting protein OS=Homo sapiens OX=9606 GN=TOLLIP PE=1 SV=1	19	5	6	5	274	30.3	5.97	97	112.6	103.2	112	92.3	89.4	90.5	109.267	90.7333	UP	1.20426	0.0041888
Q96HJ9	FMC1	Protein FMC1 homolog OS=Homo sapiens OX=9606 GN=FMC1 PE=1 SV=2	11	1	1	1	113	12.7	10.07	54	114.3	108.9	104.4	93.4	87.6	91.3	109.2	90.7667	UP	1.20308	0.00518493
Q9NRX6	TMEM167B	Protein kish-B OS=Homo sapiens OX=9606 GN=TMEM167B PE=3 SV=1	9	1	1	1	74	8.3	9.61	28	108.8	109.8	108.9	93.8	86.6	92	109.167	90.8	UP	1.20228	0.00109933
P43155	CRAT	Carnitine O-acetyltransferase OS=Homo sapiens OX=9606 GN=CRAT PE=1 SV=5	12	7	7	7	626	70.8	8.44	117	114.7	109	103.9	93.3	92.4	86.8	109.2	90.8333	UP	1.2022	0.00785802
Q13530	SERINC3	Serine incorporator 3 OS=Homo sapiens OX=9606 GN=SERINC3 PE=2 SV=2	10	4	5	4	473	52.5	7.46	48	113.2	107.2	107.1	92.2	91	89.3	109.167	90.8333	UP	1.20183	0.00110453
Q9BRP8	PYM1	Partner of Y14 and mago OS=Homo sapiens OX=9606 GN=PYM1 PE=1 SV=1	27	5	5	5	204	22.6	9.45	142	111.5	108.8	107.2	89.9	91.5	91.1	109.167	90.8333	UP	1.20183	0.000167114
P62341	SELENOT	Thioredoxin reductase-like selenoprotein T OS=Homo sapiens OX=9606 GN=SELENOT PE=1 SV=2	7	1	1	1	195	22.3	8.6	37	110.2	106.4	110.8	96.1	87.7	88.7	109.133	90.8333	UP	1.20147	0.00359123
Q71U36	TUBA1A	Tubulin alpha-1A chain OS=Homo sapiens OX=9606 GN=TUBA1A PE=1 SV=1	63	24	326	1	451	50.1	5.06	10141	109.7	109.1	108.6	92.3	94.1	86.2	109.133	90.8667	UP	1.20103	0.00162872
Q8NFF5	FLAD1	FAD synthase OS=Homo sapiens OX=9606 GN=FLAD1 PE=1 SV=1	16	6	6	6	587	65.2	6.93	159	108.8	109.9	108.7	90	89.4	93.2	109.133	90.8667	UP	1.20103	0.000123792
Q5VVQ6	YOD1	Ubiquitin thioesterase OTU1 OS=Homo sapiens OX=9606 GN=YOD1 PE=1 SV=1	42	8	9	8	348	38.3	6.11	278	106.9	113.8	106.7	96.1	86.5	90	109.133	90.8667	UP	1.20103	0.0074594
P13987	CD59	CD59 glycoprotein OS=Homo sapiens OX=9606 GN=CD59 PE=1 SV=1	25	4	9	4	128	14.2	6.48	158	106.7	107.6	113	91.8	93.5	87.3	109.1	90.8667	UP	1.20066	0.00250785
P28062	PSMB8	Proteasome subunit beta type-8 OS=Homo sapiens OX=9606 GN=PSMB8 PE=1 SV=3	25	6	9	6	276	30.3	7.43	204	111	107.5	108.8	91.6	91.5	89.5	109.1	90.8667	UP	1.20066	0.000120291
Q9BS40	LXN	Latexin OS=Homo sapiens OX=9606 GN=LXN PE=1 SV=2	5	1	1	1	222	25.7	5.78	27	112	107.8	107.6	93.3	92.3	87.1	109.133	90.9	UP	1.20059	0.00160581
P27487	DPP4	Dipeptidyl peptidase 4 OS=Homo sapiens OX=9606 GN=DPP4 PE=1 SV=2	2	2	2	2	766	88.2	6.04	0	115.2	105.7	106.5	90.5	90.4	91.8	109.133	90.9	UP	1.20059	0.00405585
Q6F5E8	CARMIL2	Capping protein, Arp2/3 and myosin-I linker protein 2 OS=Homo sapiens OX=9606 GN=CARMIL2 PE=1 SV=2	2	2	2	2	1435	154.6	6.76	0	113	102	112.3	95	87.6	90.1	109.1	90.9	UP	1.20022	0.0119934
Q96DC9	OTUB2	Ubiquitin thioesterase OTUB2 OS=Homo sapiens OX=9606 GN=OTUB2 PE=1 SV=2	7	2	2	2	234	27.2	6.23	0	120.3	105.2	101.8	92.1	89	91.6	109.1	90.9	UP	1.20022	0.0343012
Q9NVZ3	NECAP2	Adaptin ear-binding coat-associated protein 2 OS=Homo sapiens OX=9606 GN=NECAP2 PE=1 SV=1	44	8	10	8	263	28.3	8.38	175	89.3	90.7	92.6	104.9	108.4	114	90.8667	109.1	DOWN	0.832875	0.00293721
Q9Y617	PSAT1	Phosphoserine aminotransferase OS=Homo sapiens OX=9606 GN=PSAT1 PE=1 SV=2	58	18	31	18	370	40.4	7.66	624	88.3	93	91.3	119.3	101	107.1	90.8667	109.133	DOWN	0.832621	0.0302188
Q96RT7	TUBGCP6	Gamma-tubulin complex component 6 OS=Homo sapiens OX=9606 GN=TUBGCP6 PE=1 SV=3	2	2	2	2	1819	200.4	6.32	0	88.4	95.8	88.3	105.2	111.6	110.6	90.8333	109.133	DOWN	0.832315	0.00452719
P61604	HSPE1	10 kDa heat shock protein, mitochondrial OS=Homo sapiens OX=9606 GN=HSPE1 PE=1 SV=2	77	11	44	11	102	10.9	8.92	632	89.8	92	90.6	104.5	108.4	114.6	90.8	109.167	DOWN	0.831756	0.00365061
Q5T1J5	CHCHD2P9	Putative coiled-coil-helix-coiled-coil-helix domain-containing protein CHCHD2P9, mitochondrial OS=Homo sapiens OX=9606 GN=CHCHD2P9 PE=5 SV=1	9	1	2	1	151	15.5	9.89	68	89.2	92.7	90.3	116.2	108.2	103.3	90.7333	109.233	DOWN	0.830638	0.00900528
P04049	RAF1	RAF proto-oncogene serine/threonine-protein kinase OS=Homo sapiens OX=9606 GN=RAF1 PE=1 SV=1	10	7	7	4	648	73	9.2	114	87.6	93.3	91.3	105.7	104.1	118	90.7333	109.267	DOWN	0.830384	0.0168866
Q9Y5K6	CD2AP	CD2-associated protein OS=Homo sapiens OX=9606 GN=CD2AP PE=1 SV=1	41	21	28	21	639	71.4	6.4	506	89.9	90.4	91.8	107.3	110.5	110.1	90.7	109.3	DOWN	0.829826	8.73054e-05
P43246	MSH2	DNA mismatch repair protein Msh2 OS=Homo sapiens OX=9606 GN=MSH2 PE=1 SV=1	39	28	37	28	934	104.7	5.77	942	90.5	90.2	91.3	110.3	109.6	108.1	90.6667	109.333	DOWN	0.829268	1.36846e-05
Q7Z7A3	CTU1	Cytoplasmic tRNA 2-thiolation protein 1 OS=Homo sapiens OX=9606 GN=CTU1 PE=1 SV=1	7	2	2	2	348	36.4	9.2	77	84.7	92.6	94.6	111.2	102.2	114.7	90.6333	109.367	DOWN	0.828711	0.0174446
Q8IYS1	PM20D2	Peptidase M20 domain-containing protein 2 OS=Homo sapiens OX=9606 GN=PM20D2 PE=1 SV=2	12	4	4	4	436	47.7	5.85	147	86.4	92.2	93.2	110.4	108.1	109.5	90.6	109.333	DOWN	0.828659	0.00108552
P20248	CCNA2	Cyclin-A2 OS=Homo sapiens OX=9606 GN=CCNA2 PE=1 SV=2	13	3	4	3	432	48.5	6.54	69	98.8	89.9	83.1	109	102.3	116.9	90.6	109.4	DOWN	0.828154	0.0387347
Q96C36	PYCR2	Pyrroline-5-carboxylate reductase 2 OS=Homo sapiens OX=9606 GN=PYCR2 PE=1 SV=1	27	8	12	7	320	33.6	7.77	258	87.5	90.7	93.6	109.5	107.8	110.9	90.6	109.4	DOWN	0.828154	0.000682007
P09601	HMOX1	Heme oxygenase 1 OS=Homo sapiens OX=9606 GN=HMOX1 PE=1 SV=1	13	3	3	3	288	32.8	8.25	74	86.1	90.1	95.5	108.5	102.2	117.6	90.5667	109.433	DOWN	0.827597	0.0226699
P49748	ACADVL	Very long-chain specific acyl-CoA dehydrogenase, mitochondrial OS=Homo sapiens OX=9606 GN=ACADVL PE=1 SV=1	51	25	44	25	655	70.3	8.75	1056	88.6	91.9	91.2	109.4	114.8	104.1	90.5667	109.433	DOWN	0.827597	0.00437025
P16219	ACADS	Short-chain specific acyl-CoA dehydrogenase, mitochondrial OS=Homo sapiens OX=9606 GN=ACADS PE=1 SV=1	3	1	1	1	412	44.3	7.99	40	92.4	87.5	91.8	112.6	109.9	105.8	90.5667	109.433	DOWN	0.827597	0.00167117
P20290	BTF3	Transcription factor BTF3 OS=Homo sapiens OX=9606 GN=BTF3 PE=1 SV=1	61	11	21	9	206	22.2	9.38	656	89.7	92.3	89.6	106.5	107.2	114.7	90.5333	109.467	DOWN	0.82704	0.00239427
Q8WY22	BRI3BP	BRI3-binding protein OS=Homo sapiens OX=9606 GN=BRI3BP PE=1 SV=1	14	2	3	2	251	27.8	9.44	154	90.9	90.7	89.9	110.5	105.4	112.5	90.5	109.467	DOWN	0.826736	0.000888142
P49643	PRIM2	DNA primase large subunit OS=Homo sapiens OX=9606 GN=PRIM2 PE=1 SV=2	10	4	4	4	509	58.8	7.91	113	92.7	85.1	93.7	107.9	105.1	115.5	90.5	109.5	DOWN	0.826484	0.00999645
P28562	DUSP1	Dual specificity protein phosphatase 1 OS=Homo sapiens OX=9606 GN=DUSP1 PE=1 SV=3	7	2	2	2	367	39.3	7.2	37	83.5	94.6	93.3	107	109.6	111.9	90.4667	109.5	DOWN	0.82618	0.0072967
Q14807	KIF22	Kinesin-like protein KIF22 OS=Homo sapiens OX=9606 GN=KIF22 PE=1 SV=5	6	3	3	3	665	73.2	9.45	63	93.1	86.2	92.1	108.6	109.8	110.2	90.4667	109.533	DOWN	0.825928	0.000985206
Q9Y421	FAM32A	Protein FAM32A OS=Homo sapiens OX=9606 GN=FAM32A PE=1 SV=2	20	2	2	2	112	13.2	9.99	30	90.7	88.3	92.4	106.3	106.9	115.4	90.4667	109.533	DOWN	0.825928	0.00384781
Q658P3	STEAP3	Metalloreductase STEAP3 OS=Homo sapiens OX=9606 GN=STEAP3 PE=1 SV=2	7	4	4	4	488	54.6	8.6	19	84.7	89.8	96.7	107.7	116.1	105	90.4	109.6	DOWN	0.824818	0.0163869
Q15334	LLGL1	Lethal(2) giant larvae protein homolog 1 OS=Homo sapiens OX=9606 GN=LLGL1 PE=1 SV=3	9	8	9	8	1064	115.3	6.29	146	90.2	90.2	90.8	112.6	111	105.2	90.4	109.6	DOWN	0.824818	0.00104706
Q9H5V9	CXorf56	UPF0428 protein CXorf56 OS=Homo sapiens OX=9606 GN=CXorf56 PE=1 SV=1	9	2	2	2	222	25.6	8.73	32	86.3	92.6	92.2	102.2	109.8	116.9	90.3667	109.633	DOWN	0.824263	0.0149432
Q99986	VRK1	Serine/threonine-protein kinase VRK1 OS=Homo sapiens OX=9606 GN=VRK1 PE=1 SV=1	48	14	22	14	396	45.4	8.91	441	92.7	90.2	88.2	109.8	106.7	112.5	90.3667	109.667	DOWN	0.824012	0.000810153
Q9NVP1	DDX18	ATP-dependent RNA helicase DDX18 OS=Homo sapiens OX=9606 GN=DDX18 PE=1 SV=2	36	19	29	19	670	75.4	9.5	663	89.1	92.2	89.7	112.2	107.5	109.4	90.3333	109.7	DOWN	0.823458	0.00031053
Q15758	SLC1A5	Neutral amino acid transporter B(0) OS=Homo sapiens OX=9606 GN=SLC1A5 PE=1 SV=2	24	10	22	10	541	56.6	5.48	515	88.5	91.4	91	114.4	99.1	115.5	90.3	109.667	DOWN	0.823404	0.0226289
P46734	MAP2K3	Dual specificity mitogen-activated protein kinase kinase 3 OS=Homo sapiens OX=9606 GN=MAP2K3 PE=1 SV=2	58	17	30	17	347	39.3	7.43	677	88.2	91.9	90.8	112	107.5	109.7	90.3	109.733	DOWN	0.822904	0.000334384
P17026	ZNF22	Zinc finger protein 22 OS=Homo sapiens OX=9606 GN=ZNF22 PE=1 SV=3	7	2	2	2	224	25.9	10.04	20	91	93.2	86.6	111.2	106.1	111.9	90.2667	109.733	DOWN	0.8226	0.00186962
P84022	SMAD3	Mothers against decapentaplegic homolog 3 OS=Homo sapiens OX=9606 GN=SMAD3 PE=1 SV=1	20	8	14	4	425	48.1	7.15	129	91.4	88	91.1	114.3	108.1	107	90.1667	109.8	DOWN	0.82119	0.00146134
P11908	PRPS2	Ribose-phosphate pyrophosphokinase 2 OS=Homo sapiens OX=9606 GN=PRPS2 PE=1 SV=2	43	12	19	7	318	34.7	6.61	453	90.8	90.8	88.9	110	112.6	106.9	90.1667	109.833	DOWN	0.820941	0.000369258
Q9BZM4	ULBP3	UL16-binding protein 3 OS=Homo sapiens OX=9606 GN=ULBP3 PE=1 SV=1	4	1	1	1	244	27.9	8.02	17	89.8	90.3	90.4	112.4	106.3	110.9	90.1667	109.867	DOWN	0.820692	0.000435358
Q8WUQ7	CACTIN	Cactin OS=Homo sapiens OX=9606 GN=CACTIN PE=1 SV=3	9	5	5	5	758	88.6	9.14	64	86.3	90.3	93.8	108.5	107.1	114	90.1333	109.867	DOWN	0.820388	0.00283913
Q9ULH1	ASAP1	Arf-GAP with SH3 domain, ANK repeat and PH domain-containing protein 1 OS=Homo sapiens OX=9606 GN=ASAP1 PE=1 SV=4	14	13	15	12	1129	125.4	7.31	268	88.2	91.2	91	108.9	113.2	107.6	90.1333	109.9	DOWN	0.82014	0.000532824
Q9H9Y2	RPF1	Ribosome production factor 1 OS=Homo sapiens OX=9606 GN=RPF1 PE=1 SV=2	4	1	1	1	349	40.1	10.01	22	98.6	85.1	86.6	114.5	101.6	113.7	90.1	109.933	DOWN	0.819588	0.0293492
Q8NBI5	SLC43A3	Solute carrier family 43 member 3 OS=Homo sapiens OX=9606 GN=SLC43A3 PE=1 SV=2	3	2	2	2	491	54.5	8.53	15	90.5	88.8	90.9	109	111.1	109.8	90.0667	109.967	DOWN	0.819036	2.34977e-05
P55160	NCKAP1L	Nck-associated protein 1-like OS=Homo sapiens OX=9606 GN=NCKAP1L PE=1 SV=3	1	1	1	1	1127	128.1	6.86	0	93.3	91.4	85.4	116.1	112.4	101.4	90.0333	109.967	DOWN	0.818733	0.0164791
P26358	DNMT1	DNA (cytosine-5)-methyltransferase 1 OS=Homo sapiens OX=9606 GN=DNMT1 PE=1 SV=2	22	31	35	31	1616	183.1	7.75	649	86.6	88.1	95.3	111	104.5	114.4	90	109.967	DOWN	0.81843	0.00724088
Q13185	CBX3	Chromobox protein homolog 3 OS=Homo sapiens OX=9606 GN=CBX3 PE=1 SV=4	63	11	34	9	183	20.8	5.33	898	90.3	90.5	89.2	110.8	108.7	110.5	90	110	DOWN	0.818182	1.30721e-05
O94952	FBXO21	F-box only protein 21 OS=Homo sapiens OX=9606 GN=FBXO21 PE=2 SV=2	6	2	2	2	628	72.2	6.09	40	93	80.6	96.4	101.6	114.2	114.2	90	110	DOWN	0.818182	0.0350085
Q0VDF9	HSPA14	Heat shock 70 kDa protein 14 OS=Homo sapiens OX=9606 GN=HSPA14 PE=1 SV=1	26	11	13	11	509	54.8	5.59	232	94.9	86.2	88.8	100.2	108.2	121.7	89.9667	110.033	DOWN	0.817631	0.0416212
P49761	CLK3	Dual specificity protein kinase CLK3 OS=Homo sapiens OX=9606 GN=CLK3 PE=1 SV=3	3	2	2	2	638	73.5	9.92	64	89.9	90.4	89.6	104.7	110.6	114.8	89.9667	110.033	DOWN	0.817631	0.00240523
Q8NBJ7	SUMF2	Inactive C-alpha-formylglycine-generating enzyme 2 OS=Homo sapiens OX=9606 GN=SUMF2 PE=1 SV=2	22	5	6	5	301	33.8	8	161	94	88.6	87.3	110.6	114.9	104.6	89.9667	110.033	DOWN	0.817631	0.00519693
Q00059	TFAM	Transcription factor A, mitochondrial OS=Homo sapiens OX=9606 GN=TFAM PE=1 SV=1	38	12	15	12	246	29.1	9.72	184	88	92.9	89	111.6	111.9	106.7	89.9667	110.067	DOWN	0.817383	0.000872587
O43633	CHMP2A	Charged multivesicular body protein 2a OS=Homo sapiens OX=9606 GN=CHMP2A PE=1 SV=1	27	8	10	8	222	25.1	5.97	232	87.2	90.6	92	108.6	111.1	110.4	89.9333	110.033	DOWN	0.817328	0.000235597
P37235	HPCAL1	Hippocalcin-like protein 1 OS=Homo sapiens OX=9606 GN=HPCAL1 PE=1 SV=3	73	14	25	14	193	22.3	5.35	409	91.8	90	88	106.1	119.2	104.9	89.9333	110.067	DOWN	0.817081	0.0128978
Q13472	TOP3A	DNA topoisomerase 3-alpha OS=Homo sapiens OX=9606 GN=TOP3A PE=1 SV=1	2	2	2	2	1001	112.3	8.34	19	88.7	86.2	94.8	108.5	111.4	110.4	89.9	110.1	DOWN	0.81653	0.00168762
P24821	TNC	Tenascin OS=Homo sapiens OX=9606 GN=TNC PE=1 SV=3	6	9	9	9	2201	240.7	4.89	153	89.9	88.1	91.6	119.2	107.3	103.9	89.8667	110.133	DOWN	0.815981	0.0129582
Q9GZL7	WDR12	Ribosome biogenesis protein WDR12 OS=Homo sapiens OX=9606 GN=WDR12 PE=1 SV=2	47	16	17	16	423	47.7	5.9	349	84.8	92.3	92.5	113.8	105.3	111.4	89.8667	110.167	DOWN	0.815734	0.00477505
Q96DG6	CMBL	Carboxymethylenebutenolidase homolog OS=Homo sapiens OX=9606 GN=CMBL PE=1 SV=1	36	9	14	9	245	28	7.18	221	87.9	92.9	88.6	109.6	111.7	109.3	89.8	110.2	DOWN	0.814882	0.000299948
Q13526	PIN1	Peptidyl-prolyl cis-trans isomerase NIMA-interacting 1 OS=Homo sapiens OX=9606 GN=PIN1 PE=1 SV=1	33	5	5	5	163	18.2	8.82	108	93.4	87.9	87.8	111.1	107	112.7	89.7	110.267	DOWN	0.813482	0.0012101
P78540	ARG2	Arginase-2, mitochondrial OS=Homo sapiens OX=9606 GN=ARG2 PE=1 SV=1	11	3	6	3	354	38.6	6.47	140	87.6	87.6	93.7	110.5	107.4	113.1	89.6333	110.333	DOWN	0.812387	0.00138227
P63146	UBE2B	Ubiquitin-conjugating enzyme E2 B OS=Homo sapiens OX=9606 GN=UBE2B PE=1 SV=1	19	2	2	2	152	17.3	5.01	52	91.3	86.3	91.3	105.1	117.4	108.6	89.6333	110.367	DOWN	0.812141	0.00671319
Q8NAB2	KBTBD3	Kelch repeat and BTB domain-containing protein 3 OS=Homo sapiens OX=9606 GN=KBTBD3 PE=2 SV=3	1	1	1	1	612	69.8	5.35	28	87.1	92.9	88.8	112.7	115	103.5	89.6	110.4	DOWN	0.811594	0.00601989
Q9UIV1	CNOT7	CCR4-NOT transcription complex subunit 7 OS=Homo sapiens OX=9606 GN=CNOT7 PE=1 SV=3	13	3	4	2	285	32.7	4.84	81	88.8	93.4	86.5	107.4	113	110.9	89.5667	110.433	DOWN	0.811047	0.00131607
Q01973	ROR1	Inactive tyrosine-protein kinase transmembrane receptor ROR1 OS=Homo sapiens OX=9606 GN=ROR1 PE=1 SV=2	5	4	4	4	937	104.2	7.17	87	90.5	87.3	90.8	108	111.1	112.3	89.5333	110.467	DOWN	0.810501	0.000250824
O14678	ABCD4	ATP-binding cassette sub-family D member 4 OS=Homo sapiens OX=9606 GN=ABCD4 PE=1 SV=1	6	2	2	2	606	68.6	6.55	60	89.4	88.1	91.1	104.8	117.5	109.1	89.5333	110.467	DOWN	0.810501	0.00544552
Q9Y3B9	RRP15	RRP15-like protein OS=Homo sapiens OX=9606 GN=RRP15 PE=1 SV=2	11	4	4	4	282	31.5	5.52	66	86.8	87.5	94.3	109.8	103.8	117.8	89.5333	110.467	DOWN	0.810501	0.0112789
O15347	HMGB3	High mobility group protein B3 OS=Homo sapiens OX=9606 GN=HMGB3 PE=1 SV=4	38	9	14	8	200	23	8.37	278	86.2	90.5	91.7	108	112.3	111.2	89.4667	110.5	DOWN	0.809653	0.000568686
Q9UN76	SLC6A14	Sodium- and chloride-dependent neutral and basic amino acid transporter B(0+) OS=Homo sapiens OX=9606 GN=SLC6A14 PE=2 SV=1	1	1	1	1	642	72.1	8.19	0	88.5	88.5	91.4	107.7	109.3	114.5	89.4667	110.5	DOWN	0.809653	0.000753005
Q9Y244	POMP	Proteasome maturation protein OS=Homo sapiens OX=9606 GN=POMP PE=1 SV=1	58	6	7	6	141	15.8	5.11	113	87.7	87	93.7	104.4	116.1	111.1	89.4667	110.533	DOWN	0.809409	0.00623241
P12235	SLC25A4	ADP/ATP translocase 1 OS=Homo sapiens OX=9606 GN=SLC25A4 PE=1 SV=4	57	17	49	3	298	33	9.76	1040	88.2	90.5	89.2	106.8	119.7	105.6	89.3	110.7	DOWN	0.806685	0.00937247
Q99880	H2BC13	Histone H2B type 1-L OS=Homo sapiens OX=9606 GN=H2BC13 PE=1 SV=3	59	9	104	1	126	13.9	10.32	2499	87.4	84.2	96.2	108.1	111.6	112.5	89.2667	110.733	DOWN	0.806141	0.00497848
O75691	UTP20	Small subunit processome component 20 homolog OS=Homo sapiens OX=9606 GN=UTP20 PE=1 SV=3	3	7	7	7	2785	318.2	7.39	172	90.8	84	92.8	116.8	103.1	112.5	89.2	110.8	DOWN	0.805054	0.0111616
Q9NQZ2	UTP3	Something about silencing protein 10 OS=Homo sapiens OX=9606 GN=UTP3 PE=1 SV=1	4	2	2	2	479	54.5	5.62	63	86.7	92.2	88.7	114.7	103.6	114.1	89.2	110.8	DOWN	0.805054	0.00542186
Q99717	SMAD5	Mothers against decapentaplegic homolog 5 OS=Homo sapiens OX=9606 GN=SMAD5 PE=1 SV=1	13	5	5	4	465	52.2	7.71	82	93.1	81.9	92.3	111.1	107.5	114.1	89.1	110.9	DOWN	0.803427	0.00591723
Q96ST2	IWS1	Protein IWS1 homolog OS=Homo sapiens OX=9606 GN=IWS1 PE=1 SV=2	14	11	15	10	819	91.9	4.69	225	86.9	87	92.9	109.5	108.9	114.8	88.9333	111.067	DOWN	0.80072	0.00125706
O00483	NDUFA4	Cytochrome c oxidase subunit NDUFA4 OS=Homo sapiens OX=9606 GN=NDUFA4 PE=1 SV=1	56	5	7	5	81	9.4	9.38	112	94.1	84.9	87.8	120.3	100.4	112.6	88.9333	111.1	DOWN	0.80048	0.0257125
Q15397	PUM3	Pumilio homolog 3 OS=Homo sapiens OX=9606 GN=PUM3 PE=1 SV=3	29	18	23	18	648	73.5	9.64	388	91.9	87.3	87.4	114.5	103.2	115.7	88.8667	111.133	DOWN	0.79964	0.00640215
Q9H3G5	CPVL	Probable serine carboxypeptidase CPVL OS=Homo sapiens OX=9606 GN=CPVL PE=1 SV=2	1	1	1	1	476	54.1	5.62	13	90	90.8	85.1	108.6	110.8	114.7	88.6333	111.367	DOWN	0.79587	0.000837555
Q9UBT7	CTNNAL1	Alpha-catulin OS=Homo sapiens OX=9606 GN=CTNNAL1 PE=1 SV=2	2	1	1	1	734	81.8	6.64	39	92.3	83.5	90.1	112.5	107.1	114.5	88.6333	111.367	DOWN	0.79587	0.00273553
Q13057	COASY	Bifunctional coenzyme A synthase OS=Homo sapiens OX=9606 GN=COASY PE=1 SV=4	15	6	7	6	564	62.3	6.99	135	87.8	87.3	90.6	114	110.4	110	88.5667	111.467	DOWN	0.794557	0.000150641
Q9BVP2	GNL3	Guanine nucleotide-binding protein-like 3 OS=Homo sapiens OX=9606 GN=GNL3 PE=1 SV=2	37	18	23	16	549	62	9.16	590	87.9	87.6	90.1	112.7	105.8	115.8	88.5333	111.433	DOWN	0.794496	0.0017021
P05386	RPLP1	60S acidic ribosomal protein P1 OS=Homo sapiens OX=9606 GN=RPLP1 PE=1 SV=1	95	5	29	4	114	11.5	4.32	946	87.9	90.8	86.9	108.5	117.3	108.6	88.5333	111.467	DOWN	0.794258	0.00187459
P35625	TIMP3	Metalloproteinase inhibitor 3 OS=Homo sapiens OX=9606 GN=TIMP3 PE=1 SV=2	28	5	7	5	211	24.1	8.72	137	90.6	83.4	91.5	104.9	116.6	112.9	88.5	111.467	DOWN	0.793959	0.00592161
P14635	CCNB1	G2/mitotic-specific cyclin-B1 OS=Homo sapiens OX=9606 GN=CCNB1 PE=1 SV=1	25	9	10	9	433	48.3	7.47	154	93	82.9	89.5	116.1	104.2	114.2	88.4667	111.5	DOWN	0.793423	0.00823367
P29317	EPHA2	Ephrin type-A receptor 2 OS=Homo sapiens OX=9606 GN=EPHA2 PE=1 SV=2	27	20	24	17	976	108.2	6.23	546	86.9	88.5	89.5	116	102.5	116.5	88.3	111.667	DOWN	0.790746	0.00734602
Q96CX2	KCTD12	BTB/POZ domain-containing protein KCTD12 OS=Homo sapiens OX=9606 GN=KCTD12 PE=1 SV=1	47	10	14	9	325	35.7	5.64	326	87.3	88.4	89.2	118.3	109.6	107.2	88.3	111.7	DOWN	0.79051	0.00237872
Q86YN1	DOLPP1	Dolichyldiphosphatase 1 OS=Homo sapiens OX=9606 GN=DOLPP1 PE=2 SV=1	5	1	2	1	238	27	9.44	41	86.5	88.3	89.9	105	120.8	109.5	88.2333	111.767	DOWN	0.789442	0.00803546
Q11128	FUT5	Alpha-(1,3)-fucosyltransferase 5 OS=Homo sapiens OX=9606 GN=FUT5 PE=2 SV=1	3	1	1	1	374	43	8.28	0	89.6	92.1	82.9	104.1	127.2	104	88.2	111.767	DOWN	0.789144	0.0451414
Q99543	DNAJC2	DnaJ homolog subfamily C member 2 OS=Homo sapiens OX=9606 GN=DNAJC2 PE=1 SV=4	10	5	5	5	621	72	8.7	64	85.2	89.2	90.2	111.3	112.9	111.2	88.2	111.8	DOWN	0.788909	0.000130326
Q8N488	RYBP	RING1 and YY1-binding protein OS=Homo sapiens OX=9606 GN=RYBP PE=1 SV=2	25	4	6	4	228	24.8	9.63	109	83.9	89.5	91.1	107	116	112.6	88.1667	111.867	DOWN	0.788141	0.00225916
Q330K2	NDUFAF6	NADH dehydrogenase (ubiquinone) complex I, assembly factor 6 OS=Homo sapiens OX=9606 GN=NDUFAF6 PE=1 SV=2	5	1	1	1	333	38.2	9.36	30	89.8	80.2	94.2	105.3	112.9	117.6	88.0667	111.933	DOWN	0.786778	0.0120352
Q9NRZ9	HELLS	Lymphoid-specific helicase OS=Homo sapiens OX=9606 GN=HELLS PE=1 SV=1	3	2	2	2	838	97	7.93	23	94.8	81.4	87.8	115	99.2	121.9	88	112.033	DOWN	0.785481	0.0362304
P33316	DUT	Deoxyuridine 5'-triphosphate nucleotidohydrolase, mitochondrial OS=Homo sapiens OX=9606 GN=DUT PE=1 SV=4	40	7	10	7	252	26.5	9.36	186	86.7	87.7	89.4	110.1	104.2	121.8	87.9333	112.033	DOWN	0.784885	0.00998052
P61218	POLR2F	DNA-directed RNA polymerases I, II, and III subunit RPABC2 OS=Homo sapiens OX=9606 GN=POLR2F PE=1 SV=1	20	2	2	2	127	14.5	4.22	57	85.3	84.3	94.1	109.2	108.6	118.6	87.9	112.133	DOWN	0.783888	0.0057119
Q9BRS2	RIOK1	Serine/threonine-protein kinase RIO1 OS=Homo sapiens OX=9606 GN=RIOK1 PE=1 SV=2	2	1	1	1	568	65.5	6.19	30	85.3	87.3	90.9	114	102.9	119.6	87.8333	112.167	DOWN	0.783061	0.00928485
P18085	ARF4	ADP-ribosylation factor 4 OS=Homo sapiens OX=9606 GN=ARF4 PE=1 SV=3	80	11	44	7	180	20.5	7.14	1312	86.2	88.3	88.7	110.3	115.6	110.8	87.7333	112.233	DOWN	0.781705	0.000191441
Q9NV31	IMP3	U3 small nucleolar ribonucleoprotein protein IMP3 OS=Homo sapiens OX=9606 GN=IMP3 PE=1 SV=1	27	4	5	4	184	21.8	9.5	66	89.4	83.6	90.1	113.7	110	113.2	87.7	112.3	DOWN	0.780944	0.000481337
Q9NZJ9	NUDT4	Diphosphoinositol polyphosphate phosphohydrolase 2 OS=Homo sapiens OX=9606 GN=NUDT4 PE=1 SV=2	23	5	6	2	180	20.3	6.35	107	86.5	86.6	90	113.4	114.4	109.1	87.7	112.3	DOWN	0.780944	0.000246899
P57764	GSDMD	Gasdermin-D OS=Homo sapiens OX=9606 GN=GSDMD PE=1 SV=1	7	3	3	3	484	52.8	5.08	62	85.4	88.3	89.3	124.1	111	101.8	87.6667	112.3	DOWN	0.780647	0.0200079
Q8IVL1	NAV2	Neuron navigator 2 OS=Homo sapiens OX=9606 GN=NAV2 PE=1 SV=3	1	2	2	1	2488	268	9.03	24	89.5	87.2	86.3	110.2	120.1	106.7	87.6667	112.333	DOWN	0.780415	0.00392797
O15116	LSM1	U6 snRNA-associated Sm-like protein LSm1 OS=Homo sapiens OX=9606 GN=LSM1 PE=1 SV=1	18	2	2	2	133	15.2	5.22	30	86.1	86.1	90.6	110.7	112.4	114.1	87.6	112.4	DOWN	0.779359	0.000158226
Q6P9A2	GALNT18	Polypeptide N-acetylgalactosaminyltransferase 18 OS=Homo sapiens OX=9606 GN=GALNT18 PE=2 SV=2	1	1	1	1	607	69.5	6.49	0	85.6	91.5	85.6	115.6	115.5	106.3	87.5667	112.467	DOWN	0.778601	0.00243199
Q8NFP9	NBEA	Neurobeachin OS=Homo sapiens OX=9606 GN=NBEA PE=1 SV=3	2	5	6	1	2946	327.6	6.18	166	79	86.9	96	111.7	109.6	116.8	87.3	112.7	DOWN	0.774623	0.00902522
O60675	MAFK	Transcription factor MafK OS=Homo sapiens OX=9606 GN=MAFK PE=1 SV=1	16	4	4	2	156	17.5	10.1	55	81.2	85.6	95.1	109.4	117.5	111.2	87.3	112.7	DOWN	0.774623	0.00603302
P53350	PLK1	Serine/threonine-protein kinase PLK1 OS=Homo sapiens OX=9606 GN=PLK1 PE=1 SV=1	12	5	5	5	603	68.2	8.91	113	86.3	83.7	91.6	117	108	113.5	87.2	112.833	DOWN	0.772821	0.00185365
Q9Y5V0	ZNF706	Zinc finger protein 706 OS=Homo sapiens OX=9606 GN=ZNF706 PE=1 SV=1	14	1	1	1	76	8.5	10.01	25	81.7	90.4	89.3	110.7	108.6	119.2	87.1333	112.833	DOWN	0.77223	0.00374215
P62805	H4C1	Histone H4 OS=Homo sapiens OX=9606 GN=H4C1 PE=1 SV=2	53	9	96	9	103	11.4	11.36	2151	83.9	88.6	88.8	111.5	117.7	109.5	87.1	112.9	DOWN	0.771479	0.000932456
Q71DI3	HIST2H3A	Histone H3.2 OS=Homo sapiens OX=9606 GN=HIST2H3A PE=1 SV=3	56	8	67	1	136	15.4	11.27	1227	83.7	90.6	87	108.5	121.8	108.5	87.1	112.933	DOWN	0.771251	0.00602602
O60870	KIN	DNA/RNA-binding protein KIN17 OS=Homo sapiens OX=9606 GN=KIN PE=1 SV=2	16	6	7	6	393	45.3	8.95	78	87.9	84.8	88.1	107.7	116.3	115.2	86.9333	113.067	DOWN	0.768868	0.000845896
P07305	H1-0	Histone H1.0 OS=Homo sapiens OX=9606 GN=H1-0 PE=1 SV=3	27	5	11	5	194	20.9	10.84	190	84.1	89.5	87.1	113.7	122.6	103.1	86.9	113.133	DOWN	0.76812	0.0109453
Q99848	EBNA1BP2	Probable rRNA-processing protein EBP2 OS=Homo sapiens OX=9606 GN=EBNA1BP2 PE=1 SV=2	41	11	15	11	306	34.8	10.1	217	88.5	84.6	87.3	115.6	106.4	117.5	86.8	113.167	DOWN	0.76701	0.00188107
Q8IYL3	C1orf174	UPF0688 protein C1orf174 OS=Homo sapiens OX=9606 GN=C1orf174 PE=1 SV=2	6	1	1	1	243	26	6.9	91	84.5	83.5	92.2	112.9	112.8	114.1	86.7333	113.267	DOWN	0.765745	0.000673105
Q9BX40	LSM14B	Protein LSM14 homolog B OS=Homo sapiens OX=9606 GN=LSM14B PE=1 SV=1	35	9	12	9	385	42	9.69	243	82.8	84.1	93.3	113.9	110.5	115.5	86.7333	113.3	DOWN	0.765519	0.00183267
Q9BV57	ADI1	1,2-dihydroxy-3-keto-5-methylthiopentene dioxygenase OS=Homo sapiens OX=9606 GN=ADI1 PE=1 SV=1	35	5	5	5	179	21.5	5.68	61	97.7	81.4	81	106.7	109.9	123.2	86.7	113.267	DOWN	0.76545	0.0236502
A6NHL2	TUBAL3	Tubulin alpha chain-like 3 OS=Homo sapiens OX=9606 GN=TUBAL3 PE=1 SV=2	10	5	22	1	446	49.9	6.05	230	84.9	92.5	82.7	106.4	129.2	104.3	86.7	113.3	DOWN	0.765225	0.0353033
Q99933	BAG1	BAG family molecular chaperone regulator 1 OS=Homo sapiens OX=9606 GN=BAG1 PE=1 SV=4	3	1	2	1	345	38.8	7.81	54	85.4	85.6	88.9	119.1	95.8	125.3	86.6333	113.4	DOWN	0.763962	0.0416732
Q8WUW1	BRK1	Protein BRICK1 OS=Homo sapiens OX=9606 GN=BRK1 PE=1 SV=1	64	6	8	6	75	8.7	5.45	120	89.4	89.3	80.8	108.2	120.8	111.5	86.5	113.5	DOWN	0.762115	0.00464982
Q9Y3E7	CHMP3	Charged multivesicular body protein 3 OS=Homo sapiens OX=9606 GN=CHMP3 PE=1 SV=3	26	7	9	7	222	25.1	5.12	95	84.2	87.8	87.3	110.2	114.6	115.9	86.4333	113.567	DOWN	0.76108	0.000191789
Q9NR30	DDX21	Nucleolar RNA helicase 2 OS=Homo sapiens OX=9606 GN=DDX21 PE=1 SV=5	49	33	65	30	783	87.3	9.28	1490	84	87	88	117.8	104.1	119.1	86.3333	113.667	DOWN	0.759531	0.00523799
Q6UWP2	DHRS11	Dehydrogenase/reductase SDR family member 11 OS=Homo sapiens OX=9606 GN=DHRS11 PE=1 SV=1	16	3	4	3	260	28.3	6.64	151	84.7	86	88.2	113.6	113.9	113.6	86.3	113.7	DOWN	0.759015	1.17012e-05
Q9Y6E2	BZW2	Basic leucine zipper and W2 domain-containing protein 2 OS=Homo sapiens OX=9606 GN=BZW2 PE=1 SV=1	40	18	33	16	419	48.1	6.68	707	82.7	87.7	87.9	115.2	112.5	114	86.1	113.9	DOWN	0.755926	0.000119653
Q6DN03	HIST2H2BC	Putative histone H2B type 2-C OS=Homo sapiens OX=9606 GN=HIST2H2BC PE=5 SV=3	20	5	18	3	193	21.5	10.7	225	81.5	88.7	87.7	108.2	122.7	111.2	85.9667	114.033	DOWN	0.753873	0.00480633
Q9BWE0	REPIN1	Replication initiator 1 OS=Homo sapiens OX=9606 GN=REPIN1 PE=1 SV=1	3	1	1	1	567	63.5	9.98	90	82.6	84.5	90.7	112.3	105.3	124.6	85.9333	114.067	DOWN	0.753361	0.0102162
P49759	CLK1	Dual specificity protein kinase CLK1 OS=Homo sapiens OX=9606 GN=CLK1 PE=1 SV=2	6	3	3	3	484	57.3	8.87	84	71.6	96.5	89.5	111.7	118.1	112.6	85.8667	114.133	DOWN	0.752336	0.0211858
Q9UNQ2	DIMT1	Probable dimethyladenosine transferase OS=Homo sapiens OX=9606 GN=DIMT1 PE=1 SV=1	46	11	16	11	313	35.2	9.99	348	81.8	88.5	87.2	117.6	108.3	116.5	85.8333	114.133	DOWN	0.752044	0.00138521
Q92766	RREB1	Ras-responsive element-binding protein 1 OS=Homo sapiens OX=9606 GN=RREB1 PE=1 SV=3	1	1	1	1	1687	181.3	6.98	21	86.5	82.6	88.4	114.4	112.4	115.8	85.8333	114.2	DOWN	0.751605	0.000135663
Q9Y2Z9	COQ6	Ubiquinone biosynthesis monooxygenase COQ6, mitochondrial OS=Homo sapiens OX=9606 GN=COQ6 PE=1 SV=2	2	1	1	1	468	50.8	7.3	0	80.5	93.3	82.5	110.9	117.1	115.7	85.4333	114.567	DOWN	0.745708	0.00269021
Q9BQG0	MYBBP1A	Myb-binding protein 1A OS=Homo sapiens OX=9606 GN=MYBBP1A PE=1 SV=2	26	31	48	31	1328	148.8	9.28	1017	84.5	84.8	86.3	117.4	110.6	116.4	85.2	114.8	DOWN	0.74216	0.000173925
Q92688	ANP32B	Acidic leucine-rich nuclear phosphoprotein 32 family member B OS=Homo sapiens OX=9606 GN=ANP32B PE=1 SV=1	32	10	31	4	251	28.8	4.06	454	89.7	86.7	79.1	115.4	118.4	110.8	85.1667	114.867	DOWN	0.741439	0.00152245
P15407	FOSL1	Fos-related antigen 1 OS=Homo sapiens OX=9606 GN=FOSL1 PE=1 SV=1	19	4	5	4	271	29.4	8.02	76	84.2	88.7	82.3	123.3	101.6	119.8	85.0667	114.9	DOWN	0.740354	0.0129637
Q8IUF8	RIOX2	Ribosomal oxygenase 2 OS=Homo sapiens OX=9606 GN=RIOX2 PE=1 SV=1	13	6	7	6	465	52.8	6.7	83	80.9	85.8	88.3	118.4	107.7	118.9	85	115	DOWN	0.73913	0.00212533
Q6PL18	ATAD2	ATPase family AAA domain-containing protein 2 OS=Homo sapiens OX=9606 GN=ATAD2 PE=1 SV=1	4	3	3	3	1390	158.5	6.32	18	85.3	85.3	84.3	116.4	106.8	121.8	84.9667	115	DOWN	0.738841	0.00240688
P07477	PRSS1	Trypsin-1 OS=Homo sapiens OX=9606 GN=PRSS1 PE=1 SV=1	11	2	3	1	247	26.5	6.51	19	91.3	81.3	82.2	117.5	118.9	108.6	84.9333	115	DOWN	0.738551	0.0026944
P28347	TEAD1	Transcriptional enhancer factor TEF-1 OS=Homo sapiens OX=9606 GN=TEAD1 PE=1 SV=2	9	5	5	2	426	47.9	8.15	95	83.8	89.7	81.3	108.4	121.4	115.4	84.9333	115.067	DOWN	0.738123	0.00260216
Q9ULW0	TPX2	Targeting protein for Xklp2 OS=Homo sapiens OX=9606 GN=TPX2 PE=1 SV=2	36	22	24	22	747	85.6	9.23	360	88	80	86.8	119	109.3	116.9	84.9333	115.067	DOWN	0.738123	0.0014503
Q92522	H1FX	Histone H1x OS=Homo sapiens OX=9606 GN=H1FX PE=1 SV=1	49	9	15	9	213	22.5	10.76	404	78.7	86.2	89.1	114.4	123.2	108.5	84.6667	115.367	DOWN	0.733892	0.00434484
P00533	EGFR	Epidermal growth factor receptor OS=Homo sapiens OX=9606 GN=EGFR PE=1 SV=2	20	21	23	21	1210	134.2	6.68	393	84.5	83.4	86.1	120.4	112.6	113.2	84.6667	115.4	DOWN	0.73368	0.000304697
P68431	H3C1	Histone H3.1 OS=Homo sapiens OX=9606 GN=H3C1 PE=1 SV=2	56	8	47	1	136	15.4	11.12	766	85.7	83.8	83.1	103.1	128.8	115.5	84.2	115.8	DOWN	0.727116	0.0133129
Q96T88	UHRF1	E3 ubiquitin-protein ligase UHRF1 OS=Homo sapiens OX=9606 GN=UHRF1 PE=1 SV=1	6	4	4	4	793	89.8	7.56	84	82.1	80.3	89.1	117.5	108.9	122.1	83.8333	116.167	DOWN	0.721664	0.00235509
P00918	CA2	Carbonic anhydrase 2 OS=Homo sapiens OX=9606 GN=CA2 PE=1 SV=2	10	2	2	2	260	29.2	7.4	51	80.2	90.3	80.5	113.1	126.3	109.6	83.6667	116.333	DOWN	0.719198	0.00576712
O95235	KIF20A	Kinesin-like protein KIF20A OS=Homo sapiens OX=9606 GN=KIF20A PE=1 SV=1	4	3	3	3	890	100.2	6.92	64	85.7	77.4	86.9	115.9	111.9	122.1	83.3333	116.633	DOWN	0.71449	0.00138247
Q96FF9	CDCA5	Sororin OS=Homo sapiens OX=9606 GN=CDCA5 PE=1 SV=1	17	4	4	4	252	27.6	9.61	43	88.9	78	83.1	124.4	104.8	120.9	83.3333	116.7	DOWN	0.714082	0.00803427
Q5TEZ5	C6orf163	Uncharacterized protein C6orf163 OS=Homo sapiens OX=9606 GN=C6orf163 PE=4 SV=2	2	1	1	1	329	38.5	6.96	0	94.3	86.4	69.1	121.7	119.7	109	83.2667	116.8	DOWN	0.7129	0.016374
Q8IUE6	HIST2H2AB	Histone H2A type 2-B OS=Homo sapiens OX=9606 GN=HIST2H2AB PE=1 SV=3	25	4	16	2	130	14	10.89	150	78.9	88.6	82.2	108.4	131.7	110.3	83.2333	116.8	DOWN	0.712614	0.0137096
P50502	ST13	Hsc70-interacting protein OS=Homo sapiens OX=9606 GN=ST13 PE=1 SV=2	26	9	24	9	369	41.3	5.27	518	80.3	84	84.7	114.1	116.3	120.5	83	116.967	DOWN	0.709604	0.00012687
Q9Y324	FCF1	rRNA-processing protein FCF1 homolog OS=Homo sapiens OX=9606 GN=FCF1 PE=2 SV=1	7	1	1	1	198	23.4	9.7	40	82.4	81.7	83.4	118.1	123.6	110.8	82.5	117.5	DOWN	0.702128	0.000726027
Q53GA4	PHLDA2	Pleckstrin homology-like domain family A member 2 OS=Homo sapiens OX=9606 GN=PHLDA2 PE=1 SV=2	6	1	1	1	152	17.1	9.17	25	84.8	72.4	89.7	106.1	117.8	129.2	82.3	117.7	DOWN	0.699235	0.0136738
Q9UNW9	NOVA2	RNA-binding protein Nova-2 OS=Homo sapiens OX=9606 GN=NOVA2 PE=1 SV=1	2	1	1	1	492	49	8.16	25	80.3	83.2	79.2	118.5	125.5	113.4	80.9	119.133	DOWN	0.679071	0.000497355
P15531	NME1	Nucleoside diphosphate kinase A OS=Homo sapiens OX=9606 GN=NME1 PE=1 SV=1	70	11	35	6	152	17.1	6.19	464	80.9	84.2	75.7	115.8	131.5	111.9	80.2667	119.733	DOWN	0.670379	0.00367681
Q6FI13	HIST2H2AA3	Histone H2A type 2-A OS=Homo sapiens OX=9606 GN=HIST2H2AA3 PE=1 SV=3	63	7	44	4	130	14.1	10.9	611	76.2	84.6	78.1	109.9	132.2	119	79.6333	120.367	DOWN	0.66159	0.00424204
Q15147	PLCB4	1-phosphatidylinositol 4,5-bisphosphate phosphodiesterase beta-4 OS=Homo sapiens OX=9606 GN=PLCB4 PE=1 SV=3	2	2	2	2	1175	134.4	6.9	37	72.5	77.5	86.3	124.3	121.4	118	78.7667	121.233	DOWN	0.649711	0.000659209
P04818	TYMS	Thymidylate synthase OS=Homo sapiens OX=9606 GN=TYMS PE=1 SV=3	26	5	5	5	313	35.7	7.01	159	78.1	73.6	84.2	120.6	98.4	145.1	78.6333	121.367	DOWN	0.647899	0.0365931
P10412	H1-4	Histone H1.4 OS=Homo sapiens OX=9606 GN=H1-4 PE=1 SV=2	51	18	55	7	219	21.9	11.03	1061	69.8	83.3	78.6	118.7	133.3	116.3	77.2333	122.767	DOWN	0.629107	0.00234586
P42025	ACTR1B	Beta-centractin OS=Homo sapiens OX=9606 GN=ACTR1B PE=1 SV=1	32	11	19	4	376	42.3	6.4	404	71.8	77	79.5	129.6	126.7	115.3	76.1	123.867	DOWN	0.61437	0.000629322
P16403	H1-2	Histone H1.2 OS=Homo sapiens OX=9606 GN=H1-2 PE=1 SV=2	51	17	52	7	213	21.4	10.93	998	71.5	79.1	77.4	120.8	134	117.3	76	124.033	DOWN	0.612739	0.00100228
Q9H939	PSTPIP2	Proline-serine-threonine phosphatase-interacting protein 2 OS=Homo sapiens OX=9606 GN=PSTPIP2 PE=1 SV=4	2	1	1	1	334	38.8	8.48	0	65.4	64.2	97.3	133.7	119.3	120.2	75.6333	124.4	DOWN	0.607985	0.0144493
Q9BXS6	NUSAP1	Nucleolar and spindle-associated protein 1 OS=Homo sapiens OX=9606 GN=NUSAP1 PE=1 SV=1	10	4	4	4	441	49.4	9.91	111	79.3	73.8	73.1	121.6	121.3	131	75.4	124.633	DOWN	0.604975	0.000192257
Q58FF6	HSP90AB4P	Putative heat shock protein HSP 90-beta 4 OS=Homo sapiens OX=9606 GN=HSP90AB4P PE=5 SV=1	14	7	26	2	505	58.2	4.73	381	70.2	75.7	76.5	113.6	142.2	121.7	74.1333	125.833	DOWN	0.589139	0.00408675
Q96F63	CCDC97	Coiled-coil domain-containing protein 97 OS=Homo sapiens OX=9606 GN=CCDC97 PE=1 SV=1	3	1	1	1	343	38.9	4.59	0	58.1	68	95.5	138.5	141.8	98.1	73.8667	126.133	DOWN	0.585624	0.0436669
O00767	SCD	Acyl-CoA desaturase OS=Homo sapiens OX=9606 GN=SCD PE=1 SV=2	4	1	1	1	359	41.5	9	60	65.2	79.9	76.2	115.8	128.4	134.4	73.7667	126.2	DOWN	0.584522	0.00173373
Q16533	SNAPC1	snRNA-activating protein complex subunit 1 OS=Homo sapiens OX=9606 GN=SNAPC1 PE=1 SV=1	11	4	4	4	368	43	9.51	0	68.7	73.6	66.2	129.2	114.7	147.6	69.5	130.5	DOWN	0.532567	0.00334711
O75052	NOS1AP	Carboxyl-terminal PDZ ligand of neuronal nitric oxide synthase protein OS=Homo sapiens OX=9606 GN=NOS1AP PE=1 SV=3	2	1	1	1	506	56.1	6.3	0	75.1	90.5	238.5	63.4	64.4	68.1	134.7	65.3	-	2.06279	0.253745
P41219	PRPH	Peripherin OS=Homo sapiens OX=9606 GN=PRPH PE=1 SV=2	9	5	18	1	470	53.6	5.47	301	253.4	42.4	95.6	29.8	54.8	123.9	130.467	69.5	-	1.87722	0.428826
Q8IZS8	CACNA2D3	Voltage-dependent calcium channel subunit alpha-2/delta-3 OS=Homo sapiens OX=9606 GN=CACNA2D3 PE=1 SV=1	1	1	1	1	1091	122.9	5.78	0	60	78.4	246.9	71.3	67.8	75.7	128.433	71.6	-	1.79376	0.393683
P02774	GC	Vitamin D-binding protein OS=Homo sapiens OX=9606 GN=GC PE=1 SV=2	8	2	2	2	474	52.9	5.45	117	99.1	189.5	96.2	70.3	83	61.9	128.267	71.7333	-	1.7881	0.144569
P31151	S100A7	Protein S100-A7 OS=Homo sapiens OX=9606 GN=S100A7 PE=1 SV=4	11	1	1	1	101	11.5	6.77	0	60.6	60.7	261.8	70.2	69.6	77.2	127.7	72.3333	-	1.76544	0.455625
O60783	MRPS14	28S ribosomal protein S14, mitochondrial OS=Homo sapiens OX=9606 GN=MRPS14 PE=1 SV=1	12	1	1	1	128	15.1	11.41	83	186.5	88	107	59	66.1	93.4	127.167	72.8333	-	1.746	0.164139
P48594	SERPINB4	Serpin B4 OS=Homo sapiens OX=9606 GN=SERPINB4 PE=1 SV=2	8	3	3	3	390	44.8	6.21	41	120	94.7	161.8	75.5	75.1	72.9	125.5	74.5	-	1.68456	0.0597606
O75807	PPP1R15A	Protein phosphatase 1 regulatory subunit 15A OS=Homo sapiens OX=9606 GN=PPP1R15A PE=1 SV=1	1	1	1	1	674	73.4	4.61	0	78.2	84.2	213.9	73.1	69.9	80.6	125.433	74.5333	-	1.68292	0.315363
Q8NBP0	TTC13	Tetratricopeptide repeat protein 13 OS=Homo sapiens OX=9606 GN=TTC13 PE=2 SV=3	1	1	1	1	860	96.8	7.01	24	168.8	107.3	100.1	86.2	51.4	86.1	125.4	74.5667	-	1.68172	0.108548
P05109	S100A8	Protein S100-A8 OS=Homo sapiens OX=9606 GN=S100A8 PE=1 SV=1	12	1	1	1	93	10.8	7.03	22	71.9	70.4	233.1	77.5	73.7	73.4	125.133	74.8667	-	1.67142	0.404627
Q99418	CYTH2	Cytohesin-2 OS=Homo sapiens OX=9606 GN=CYTH2 PE=1 SV=2	6	1	1	1	400	46.5	5.54	31	93.4	89.6	187.5	81.9	71.3	76.2	123.5	76.4667	-	1.61508	0.217489
Q2TAA8	TSNAXIP1	Translin-associated factor X-interacting protein 1 OS=Homo sapiens OX=9606 GN=TSNAXIP1 PE=2 SV=1	1	1	2	1	658	76.7	5.06	17	167.7	106.5	94.9	78.3	67.7	84.9	123.033	76.9667	-	1.59853	0.117253
O43426	SYNJ1	Synaptojanin-1 OS=Homo sapiens OX=9606 GN=SYNJ1 PE=1 SV=2	1	1	1	1	1573	173	7.42	0	74.8	83.9	202.9	90.7	69.1	78.6	120.533	79.4667	-	1.51678	0.380859
Q9ULJ7	ANKRD50	Ankyrin repeat domain-containing protein 50 OS=Homo sapiens OX=9606 GN=ANKRD50 PE=1 SV=4	1	1	1	1	1429	155.8	6.6	22	78.8	75.6	206.9	71.2	84.5	82.9	120.433	79.5333	-	1.51425	0.399802
P54132	BLM	Bloom syndrome protein OS=Homo sapiens OX=9606 GN=BLM PE=1 SV=1	3	4	4	3	1417	158.9	7.49	24	195	74.2	86.7	81.2	78.3	84.7	118.633	81.4	-	1.45741	0.387122
P31944	CASP14	Caspase-14 OS=Homo sapiens OX=9606 GN=CASP14 PE=1 SV=2	7	1	1	1	242	27.7	5.58	0	151.5	105.9	97.5	92.5	72.4	80.2	118.3	81.7	-	1.44798	0.108454
P06702	S100A9	Protein S100-A9 OS=Homo sapiens OX=9606 GN=S100A9 PE=1 SV=1	27	3	3	3	114	13.2	6.13	33	79.7	76.6	198.1	84.1	77.6	83.9	118.133	81.8667	-	1.443	0.416397
Q16526	CRY1	Cryptochrome-1 OS=Homo sapiens OX=9606 GN=CRY1 PE=1 SV=1	2	1	1	1	586	66.4	8	31	91.4	63.4	198.7	64.7	75.3	106.5	117.833	82.1667	-	1.43408	0.454444
Q8WXE9	STON2	Stonin-2 OS=Homo sapiens OX=9606 GN=STON2 PE=1 SV=1	1	1	1	1	905	101.1	5.39	37	147.1	101.8	100.2	91.6	71.4	87.8	116.367	83.6	-	1.39195	0.119243
Q96D31	ORAI1	Calcium release-activated calcium channel protein 1 OS=Homo sapiens OX=9606 GN=ORAI1 PE=1 SV=2	4	1	1	1	301	32.6	8.32	0	106.1	93.2	148.6	91.5	82.9	77.8	115.967	84.0667	-	1.37946	0.137369
Q9NZP5	OR5AC2	Olfactory receptor 5AC2 OS=Homo sapiens OX=9606 GN=OR5AC2 PE=3 SV=2	2	1	1	1	309	35.3	8.94	26	148.4	104.6	93.4	97.3	66.2	90.2	115.467	84.5667	-	1.36539	0.183523
P61026	RAB10	Ras-related protein Rab-10 OS=Homo sapiens OX=9606 GN=RAB10 PE=1 SV=1	65	13	32	10	200	22.5	8.38	729	122	84.8	139.5	82.2	85.8	85.7	115.433	84.5667	-	1.365	0.12894
Q9HCE7	SMURF1	E3 ubiquitin-protein ligase SMURF1 OS=Homo sapiens OX=9606 GN=SMURF1 PE=1 SV=2	3	2	2	2	757	86.1	7.02	22	111.2	92.8	142.3	84.4	78.9	90.4	115.433	84.5667	-	1.365	0.105727
Q86YA3	ZGRF1	Protein ZGRF1 OS=Homo sapiens OX=9606 GN=ZGRF1 PE=1 SV=3	0	1	1	1	2104	236.5	6.16	27	138.9	102	104	94.5	68.9	91.7	114.967	85.0333	-	1.35202	0.107321
P02771	AFP	Alpha-fetoprotein OS=Homo sapiens OX=9606 GN=AFP PE=1 SV=1	3	2	2	2	609	68.6	5.68	67	91.3	163	90.5	83.7	96.3	75.1	114.933	85.0333	-	1.35163	0.294568
O94854	KIAA0754	Uncharacterized protein KIAA0754 OS=Homo sapiens OX=9606 GN=KIAA0754 PE=2 SV=4	1	1	2	1	1291	135.1	4.21	20	135.1	102.3	106.2	90.2	80.4	85.8	114.533	85.4667	-	1.34009	0.0535404
Q9NZ56	FMN2	Formin-2 OS=Homo sapiens OX=9606 GN=FMN2 PE=1 SV=4	0	1	1	1	1722	180	5.47	0	140.3	95.1	107.8	90.7	78.5	87.7	114.4	85.6333	-	1.33593	0.108199
Q8TBK2	SETD6	N-lysine methyltransferase SETD6 OS=Homo sapiens OX=9606 GN=SETD6 PE=1 SV=2	2	1	1	1	473	53.2	5.34	0	89.4	95	157.7	87.9	84.7	85.3	114.033	85.9667	-	1.32648	0.269516
Q9UFW8	CGGBP1	CGG triplet repeat-binding protein 1 OS=Homo sapiens OX=9606 GN=CGGBP1 PE=1 SV=2	6	1	1	1	167	18.8	8.95	0	102.6	91.8	147.6	86.1	85.6	86.3	114	86	-	1.32558	0.176646
Q9P1Y6	PHRF1	PHD and RING finger domain-containing protein 1 OS=Homo sapiens OX=9606 GN=PHRF1 PE=1 SV=3	2	2	2	2	1649	178.6	8.95	0	129.9	103.6	108.2	49.6	101.6	107.2	113.9	86.1333	-	1.32237	0.238347
P02765	AHSG	Alpha-2-HS-glycoprotein OS=Homo sapiens OX=9606 GN=AHSG PE=1 SV=2	5	2	8	2	367	39.3	5.72	118	92.9	157.9	90.6	83.4	95.4	79.9	113.8	86.2333	-	1.31968	0.288704
Q969P6	TOP1MT	DNA topoisomerase I, mitochondrial OS=Homo sapiens OX=9606 GN=TOP1MT PE=1 SV=1	7	5	8	1	601	69.8	9.41	157	132.7	107.4	100.2	91.1	82.1	86.4	113.433	86.5333	-	1.31086	0.05762
P06307	CCK	Cholecystokinin OS=Homo sapiens OX=9606 GN=CCK PE=1 SV=1	8	1	1	1	115	12.7	9.01	0	80.8	91.7	167.8	85.7	83.8	90.2	113.433	86.5667	-	1.31036	0.382818
P00750	PLAT	Tissue-type plasminogen activator OS=Homo sapiens OX=9606 GN=PLAT PE=1 SV=1	5	2	2	2	562	62.9	7.8	0	133.1	99.4	107.5	90.9	85.7	83.4	113.333	86.6667	-	1.30769	0.0622953
Q9NPL8	TIMMDC1	Complex I assembly factor TIMMDC1, mitochondrial OS=Homo sapiens OX=9606 GN=TIMMDC1 PE=1 SV=2	5	1	1	1	285	32.2	8.5	16	91.9	132.6	114.7	83.3	90.3	87.2	113.067	86.9333	-	1.30061	0.0940231
Q15070	OXA1L	Mitochondrial inner membrane protein OXA1L OS=Homo sapiens OX=9606 GN=OXA1L PE=1 SV=3	5	2	2	2	435	48.5	9.45	36	144.8	68.5	125.8	93.9	81.7	85.3	113.033	86.9667	-	1.29973	0.324363
P32320	CDA	Cytidine deaminase OS=Homo sapiens OX=9606 GN=CDA PE=1 SV=2	14	1	1	1	146	16.2	6.92	45	85.7	90.7	162.2	76	88.6	96.8	112.867	87.1333	-	1.29533	0.368954
Q9HCJ6	VAT1L	Synaptic vesicle membrane protein VAT-1 homolog-like OS=Homo sapiens OX=9606 GN=VAT1L PE=1 SV=2	3	1	1	1	419	45.9	5.06	0	131.8	102	104.5	101.3	66.3	94	112.767	87.2	-	1.2932	0.148499
Q9HB65	ELL3	RNA polymerase II elongation factor ELL3 OS=Homo sapiens OX=9606 GN=ELL3 PE=1 SV=2	3	1	1	1	397	45.3	6.06	0	87.2	89.7	160.2	87.4	91.4	84	112.367	87.6	-	1.28272	0.360814
Q56VL3	OCIAD2	OCIA domain-containing protein 2 OS=Homo sapiens OX=9606 GN=OCIAD2 PE=1 SV=1	34	5	7	5	154	16.9	9.03	147	132	98.5	105.6	98.8	75	90.2	112.033	88	-	1.27311	0.123302
P31350	RRM2	Ribonucleoside-diphosphate reductase subunit M2 OS=Homo sapiens OX=9606 GN=RRM2 PE=1 SV=1	19	7	9	6	389	44.8	5.38	260	127.9	99	109	86.1	80.8	97.1	111.967	88	-	1.27235	0.0696208
Q96EX1	SMIM12	Small integral membrane protein 12 OS=Homo sapiens OX=9606 GN=SMIM12 PE=1 SV=3	29	3	3	3	92	10.8	8.44	16	133.2	92.3	110.4	86.5	73	104.6	111.967	88.0333	-	1.27187	0.184899
P19634	SLC9A1	Sodium/hydrogen exchanger 1 OS=Homo sapiens OX=9606 GN=SLC9A1 PE=1 SV=2	3	1	1	1	815	90.7	7.21	50	111.3	102.9	121.6	92.3	70.9	100.9	111.933	88.0333	-	1.27149	0.0837288
Q9UBW7	ZMYM2	Zinc finger MYM-type protein 2 OS=Homo sapiens OX=9606 GN=ZMYM2 PE=1 SV=1	2	3	3	3	1377	154.8	6.34	84	130.5	99.8	105.2	84	80.2	100.3	111.833	88.1667	-	1.26843	0.104175
P48775	TDO2	Tryptophan 2,3-dioxygenase OS=Homo sapiens OX=9606 GN=TDO2 PE=1 SV=1	2	1	2	1	406	47.8	6.93	14	135.7	97.1	102.3	93	85.8	86.1	111.7	88.3	-	1.26501	0.130337
Q9Y5F0	PCDHB13	Protocadherin beta-13 OS=Homo sapiens OX=9606 GN=PCDHB13 PE=2 SV=1	1	1	1	1	798	87.5	4.92	0	143.6	99.7	91.6	90.9	81.5	92.7	111.633	88.3667	-	1.2633	0.231847
P02788	LTF	Lactotransferrin OS=Homo sapiens OX=9606 GN=LTF PE=1 SV=6	4	3	4	3	710	78.1	8.12	81	90.1	151	93.4	87.4	94.6	83.5	111.5	88.5	-	1.25989	0.315033
Q96JB1	DNAH8	Dynein heavy chain 8, axonemal OS=Homo sapiens OX=9606 GN=DNAH8 PE=1 SV=2	0	1	1	1	4490	514.3	6.32	0	133.9	100.7	99.2	92.9	81.2	92.1	111.267	88.7333	-	1.25394	0.132106
Q15041	ARL6IP1	ADP-ribosylation factor-like protein 6-interacting protein 1 OS=Homo sapiens OX=9606 GN=ARL6IP1 PE=1 SV=2	23	3	7	3	203	23.3	9.32	155	102.4	93.3	138.1	88.3	89.5	88.4	111.267	88.7333	-	1.25394	0.174789
Q6ZR37	PLEKHG7	Pleckstrin homology domain-containing family G member 7 OS=Homo sapiens OX=9606 GN=PLEKHG7 PE=2 SV=1	2	1	1	1	379	44.3	8.27	0	129.3	100.2	103.8	98	76.5	92.2	111.1	88.9	-	1.24972	0.118182
Q9Y6N6	LAMC3	Laminin subunit gamma-3 OS=Homo sapiens OX=9606 GN=LAMC3 PE=1 SV=3	1	1	1	1	1575	171.1	6.58	0	133	99.2	101	94.8	80.2	91.9	111.067	88.9667	-	1.24841	0.135648
Q9BU23	LMF2	Lipase maturation factor 2 OS=Homo sapiens OX=9606 GN=LMF2 PE=1 SV=2	4	2	3	2	707	79.6	10.1	98	140.4	93.3	99.3	90.4	76.5	100	111	88.9667	-	1.24766	0.247793
Q7Z4G4	TRMT11	tRNA (guanine(10)-N2)-methyltransferase homolog OS=Homo sapiens OX=9606 GN=TRMT11 PE=1 SV=1	6	2	3	2	463	53.4	7.78	122	90.9	56.1	185.7	119.2	69	79.2	110.9	89.1333	-	1.2442	0.62882
Q49AR2	C5orf22	UPF0489 protein C5orf22 OS=Homo sapiens OX=9606 GN=C5orf22 PE=1 SV=2	12	3	3	3	442	49.9	4.78	104	140	93.3	98	89.3	92.1	87.3	110.433	89.5667	-	1.23297	0.234252
P02768	ALB	Serum albumin OS=Homo sapiens OX=9606 GN=ALB PE=1 SV=2	8	6	18	6	609	69.3	6.28	265	91.3	141.7	98.2	88.7	97.4	82.7	110.4	89.6	-	1.23214	0.272068
Q9NQC7	CYLD	Ubiquitin carboxyl-terminal hydrolase CYLD OS=Homo sapiens OX=9606 GN=CYLD PE=1 SV=1	6	5	5	5	956	107.2	5.59	46	93.9	100.6	136.7	89	84.9	95	110.4	89.6333	-	1.23168	0.201779
Q8IXQ6	PARP9	Protein mono-ADP-ribosyltransferase PARP9 OS=Homo sapiens OX=9606 GN=PARP9 PE=1 SV=2	3	2	2	2	854	96.3	7.91	36	126	100.8	104.2	98.6	83.3	87	110.333	89.6333	-	1.23094	0.086258
O60637	TSPAN3	Tetraspanin-3 OS=Homo sapiens OX=9606 GN=TSPAN3 PE=2 SV=1	3	1	1	1	253	28	5.81	29	121.1	106.5	103.3	85	82.6	101.7	110.3	89.7667	-	1.22874	0.0649632
Q8NFQ8	TOR1AIP2	Torsin-1A-interacting protein 2 OS=Homo sapiens OX=9606 GN=TOR1AIP2 PE=1 SV=1	14	5	7	4	470	51.2	4.96	165	133.8	95.1	101.5	93.7	80.3	95.6	110.133	89.8667	-	1.22552	0.191489
A0A0A0MS15	IGHV3-49	Immunoglobulin heavy variable 3-49 OS=Homo sapiens OX=9606 GN=IGHV3-49 PE=3 SV=1	13	1	2	1	119	13	8.62	0	122.8	106	101.5	99.4	74.5	95.8	110.1	89.9	-	1.22469	0.116597
P36954	POLR2I	DNA-directed RNA polymerase II subunit RPB9 OS=Homo sapiens OX=9606 GN=POLR2I PE=1 SV=1	27	2	2	2	125	14.5	5.14	41	92.3	96.4	141.2	87.7	90	92.3	109.967	90	-	1.22185	0.272828
Q8NF91	SYNE1	Nesprin-1 OS=Homo sapiens OX=9606 GN=SYNE1 PE=1 SV=4	0	2	2	2	8797	1010.5	5.53	17	81.8	88.3	159.8	91	89.5	89.6	109.967	90.0333	-	1.2214	0.469775
O60318	MCM3AP	Germinal-center associated nuclear protein OS=Homo sapiens OX=9606 GN=MCM3AP PE=1 SV=2	3	3	3	3	1980	218.3	6.39	71	99.8	99.1	130.9	93.7	85.9	90.6	109.933	90.0667	-	1.22058	0.137684
Q8N3E9	PLCD3	1-phosphatidylinositol 4,5-bisphosphate phosphodiesterase delta-3 OS=Homo sapiens OX=9606 GN=PLCD3 PE=1 SV=3	7	3	3	3	789	89.2	6.98	93	105.4	92.8	131.3	91.5	87.9	91.1	109.833	90.1667	-	1.21811	0.159304
O60499	STX10	Syntaxin-10 OS=Homo sapiens OX=9606 GN=STX10 PE=1 SV=1	20	4	4	3	249	28.1	4.89	57	87.9	95	145.5	91.2	89.1	91.3	109.467	90.5333	-	1.20913	0.3557
Q8NCS4	TMEM35B	Transmembrane protein 35B OS=Homo sapiens OX=9606 GN=TMEM35B PE=1 SV=1	8	1	1	1	154	16.9	9.17	31	85.8	95.7	146.6	93.2	90.3	88.4	109.367	90.6333	-	1.20669	0.377394
Q14192	FHL2	Four and a half LIM domains protein 2 OS=Homo sapiens OX=9606 GN=FHL2 PE=1 SV=3	50	11	14	11	279	32.2	7.55	120	121.5	103	103.5	93.1	82.3	96.6	109.333	90.6667	-	1.20588	0.0664431
Q9P2G1	ANKIB1	Ankyrin repeat and IBR domain-containing protein 1 OS=Homo sapiens OX=9606 GN=ANKIB1 PE=1 SV=3	1	1	1	1	1089	121.9	5.11	43	128.5	97.1	102.4	95.9	83.1	93	109.333	90.6667	-	1.20588	0.148583
Q92626	PXDN	Peroxidasin homolog OS=Homo sapiens OX=9606 GN=PXDN PE=1 SV=2	2	2	2	2	1479	165.2	7.17	46	123.2	100.8	103.9	106.3	75.5	90.3	109.3	90.7	-	1.20507	0.175777
Q9UQC9	CLCA2	Calcium-activated chloride channel regulator 2 OS=Homo sapiens OX=9606 GN=CLCA2 PE=1 SV=2	2	1	1	1	943	103.9	7.02	0	97.7	111.4	118.5	83.8	89.3	99.4	109.2	90.8333	-	1.2022	0.0736393
O14964	HGS	Hepatocyte growth factor-regulated tyrosine kinase substrate OS=Homo sapiens OX=9606 GN=HGS PE=1 SV=1	26	18	25	18	777	86.1	6.16	356	122.5	99.1	105.9	91.2	83.3	98.1	109.167	90.8667	-	1.20139	0.0883511
O94964	SOGA1	Protein SOGA1 OS=Homo sapiens OX=9606 GN=SOGA1 PE=1 SV=2	2	3	3	2	1423	159.7	6.46	50	124.9	97.5	104.9	94.5	83.8	94.4	109.1	90.9	-	1.20022	0.110915
Q9UKL6	PCTP	Phosphatidylcholine transfer protein OS=Homo sapiens OX=9606 GN=PCTP PE=1 SV=1	13	3	3	3	214	24.8	5.78	14	112.3	110.4	104.6	85.8	93.4	93.6	109.1	90.9333	-	1.19978	0.00627902
P10124	SRGN	Serglycin OS=Homo sapiens OX=9606 GN=SRGN PE=1 SV=3	9	1	1	1	158	17.6	4.96	47	110	102.8	114.4	90	90.3	92.5	109.067	90.9333	-	1.19941	0.00641303
P62072	TIMM10	Mitochondrial import inner membrane translocase subunit Tim10 OS=Homo sapiens OX=9606 GN=TIMM10 PE=1 SV=1	60	6	7	6	90	10.3	6.29	156	105.5	111.2	110.5	92.6	87.1	93.1	109.067	90.9333	-	1.19941	0.00231915
Q9BQ24	ZFYVE21	Zinc finger FYVE domain-containing protein 21 OS=Homo sapiens OX=9606 GN=ZFYVE21 PE=1 SV=1	13	2	2	2	234	26.5	8.41	49	115	104.9	107.3	83.7	91.3	97.8	109.067	90.9333	-	1.19941	0.0234949
Q8N9T2	NKAPP1	Putative uncharacterized protein CXorf42 OS=Homo sapiens OX=9606 GN=NKAPP1 PE=5 SV=3	6	1	1	1	125	14.2	8.94	38	107.8	113.7	105.6	90.2	87.3	95.3	109.033	90.9333	-	1.19905	0.00576585
P62745	RHOB	Rho-related GTP-binding protein RhoB OS=Homo sapiens OX=9606 GN=RHOB PE=1 SV=1	42	6	9	3	196	22.1	5.24	279	113.8	111.7	101.6	87.6	95.5	89.8	109.033	90.9667	-	1.19861	0.0152458
Q7L8J4	SH3BP5L	SH3 domain-binding protein 5-like OS=Homo sapiens OX=9606 GN=SH3BP5L PE=1 SV=1	16	5	5	5	393	43.5	5.77	80	114.8	104.6	107.7	92.6	90.4	89.9	109.033	90.9667	-	1.19861	0.00447696
P53814	SMTN	Smoothelin OS=Homo sapiens OX=9606 GN=SMTN PE=1 SV=7	17	11	12	11	917	99	9.07	260	100.8	100.6	125.7	92.9	83	97	109.033	90.9667	-	1.19861	0.12436
Q14108	SCARB2	Lysosome membrane protein 2 OS=Homo sapiens OX=9606 GN=SCARB2 PE=1 SV=2	11	5	9	5	478	54.3	5.14	158	118.1	103	105.9	92.3	90	90.6	109	90.9667	-	1.19824	0.0182178
P48681	NES	Nestin OS=Homo sapiens OX=9606 GN=NES PE=1 SV=2	13	16	20	16	1621	177.3	4.36	427	113.2	104.9	108.9	88.3	93.3	91.4	109	91	-	1.1978	0.00302986
Q9BPW8	NIPSNAP1	Protein NipSnap homolog 1 OS=Homo sapiens OX=9606 GN=NIPSNAP1 PE=1 SV=1	30	6	6	4	284	33.3	9.31	78	115.7	107.2	103.9	91.6	95	86.6	108.933	91.0667	-	1.19619	0.0139642
Q9H0V9	LMAN2L	VIP36-like protein OS=Homo sapiens OX=9606 GN=LMAN2L PE=1 SV=1	18	6	6	6	348	39.7	8.38	81	110.3	108.8	107.7	93.1	90.7	89.4	108.933	91.0667	-	1.19619	0.000172403
Q8WUX9	CHMP7	Charged multivesicular body protein 7 OS=Homo sapiens OX=9606 GN=CHMP7 PE=1 SV=1	29	9	10	9	453	50.9	5.35	213	111.4	108.4	106.8	91.2	90.9	91.2	108.867	91.1	-	1.19502	0.000193639
P14923	JUP	Junction plakoglobin OS=Homo sapiens OX=9606 GN=JUP PE=1 SV=3	19	12	13	8	745	81.7	6.14	232	112.6	104.5	109.6	91	97.2	85.2	108.9	91.1333	-	1.19495	0.0133099
Q6UVK1	CSPG4	Chondroitin sulfate proteoglycan 4 OS=Homo sapiens OX=9606 GN=CSPG4 PE=1 SV=2	17	30	33	30	2322	250.4	5.47	827	114.7	104	108	92.8	89.9	90.7	108.9	91.1333	-	1.19495	0.00538005
Q8IXJ6	SIRT2	NAD-dependent protein deacetylase sirtuin-2 OS=Homo sapiens OX=9606 GN=SIRT2 PE=1 SV=2	14	4	4	4	389	43.2	5.36	30	110.3	112.8	103.6	86.4	94.7	92.3	108.9	91.1333	-	1.19495	0.00856444
P04080	CSTB	Cystatin-B OS=Homo sapiens OX=9606 GN=CSTB PE=1 SV=2	80	5	16	5	98	11.1	7.56	441	110	110.1	106.5	85.3	96.3	91.8	108.867	91.1333	-	1.19459	0.0064819
Q8IVL5	P3H2	Prolyl 3-hydroxylase 2 OS=Homo sapiens OX=9606 GN=P3H2 PE=1 SV=1	13	7	11	7	708	80.9	5.71	207	112.5	108.9	105.2	89.9	92.8	90.7	108.867	91.1333	-	1.19459	0.0014683
Q12797	ASPH	Aspartyl/asparaginyl beta-hydroxylase OS=Homo sapiens OX=9606 GN=ASPH PE=1 SV=3	26	17	24	17	758	85.8	5.01	557	108.8	109.4	108.3	88.8	93.6	91	108.833	91.1333	-	1.19422	0.000240356
P38571	LIPA	Lysosomal acid lipase/cholesteryl ester hydrolase OS=Homo sapiens OX=9606 GN=LIPA PE=1 SV=2	9	3	4	3	399	45.4	6.92	84	123.1	104.2	99.3	93.5	90	90	108.867	91.1667	-	1.19415	0.0736771
Q96CV9	OPTN	Optineurin OS=Homo sapiens OX=9606 GN=OPTN PE=1 SV=3	43	22	29	22	577	65.9	5.17	504	115.2	105.8	105.5	90.4	93.3	89.8	108.833	91.1667	-	1.19378	0.00628243
P56715	RP1	Oxygen-regulated protein 1 OS=Homo sapiens OX=9606 GN=RP1 PE=1 SV=1	0	1	1	1	2156	240.5	5.8	0	93.8	96.5	136.1	97.5	84.9	91.1	108.8	91.1667	-	1.19342	0.280638
Q13510	ASAH1	Acid ceramidase OS=Homo sapiens OX=9606 GN=ASAH1 PE=1 SV=5	18	6	8	6	395	44.6	7.62	170	118.2	104.1	104.1	92.8	92.6	88.2	108.8	91.2	-	1.19298	0.0234352
Q99538	LGMN	Legumain OS=Homo sapiens OX=9606 GN=LGMN PE=1 SV=1	14	4	5	4	433	49.4	6.55	150	119.5	106.2	100.6	91.9	87.9	93.9	108.767	91.2333	-	1.19218	0.0405793
P99999	CYCS	Cytochrome c OS=Homo sapiens OX=9606 GN=CYCS PE=1 SV=2	64	8	13	8	105	11.7	9.57	394	108.6	110.7	106.9	99.1	87.5	87.1	108.733	91.2333	-	1.19182	0.0128138
P34059	GALNS	N-acetylgalactosamine-6-sulfatase OS=Homo sapiens OX=9606 GN=GALNS PE=1 SV=1	3	2	2	2	522	58	6.74	26	115.7	101.8	108.8	93.4	90.4	90	108.767	91.2667	-	1.19175	0.013551
Q96GX2	ATXN7L3B	Ataxin-7-like protein 3B OS=Homo sapiens OX=9606 GN=ATXN7L3B PE=1 SV=2	24	2	2	2	97	10.8	4.36	67	121.6	98.2	106.4	89.6	80.1	104.1	108.733	91.2667	-	1.19138	0.148709
Q8IV08	PLD3	5'-3' exonuclease PLD3 OS=Homo sapiens OX=9606 GN=PLD3 PE=1 SV=1	16	6	6	6	490	54.7	6.47	80	113.2	100.4	112.6	90.1	89.5	94.2	108.733	91.2667	-	1.19138	0.0168446
Q5T8D3	ACBD5	Acyl-CoA-binding domain-containing protein 5 OS=Homo sapiens OX=9606 GN=ACBD5 PE=1 SV=1	8	4	5	4	534	60.1	5.33	82	109.3	108.3	108.6	89.9	90.8	93.1	108.733	91.2667	-	1.19138	6.25249e-05
Q9BRR6	ADPGK	ADP-dependent glucokinase OS=Homo sapiens OX=9606 GN=ADPGK PE=1 SV=1	15	6	8	6	497	54.1	6.2	180	106.8	109.7	109.7	91	91.5	91.3	108.733	91.2667	-	1.19138	5.76512e-05
Q15836	VAMP3	Vesicle-associated membrane protein 3 OS=Homo sapiens OX=9606 GN=VAMP3 PE=1 SV=3	40	4	7	1	100	11.3	8.79	287	110.9	107.7	107.5	94.1	87.6	92.1	108.7	91.2667	-	1.19102	0.0014094
O15155	BET1	BET1 homolog OS=Homo sapiens OX=9606 GN=BET1 PE=1 SV=1	15	1	3	1	118	13.3	9.06	166	111	111	104.1	94.3	88.4	91.2	108.7	91.3	-	1.19058	0.00370101
P52657	GTF2A2	Transcription initiation factor IIA subunit 2 OS=Homo sapiens OX=9606 GN=GTF2A2 PE=1 SV=1	28	3	4	3	109	12.4	6.62	76	109.5	98.3	118.3	92.1	85.1	96.7	108.7	91.3	-	1.19058	0.0601943
Q9Y623	MYH4	Myosin-4 OS=Homo sapiens OX=9606 GN=MYH4 PE=2 SV=2	1	1	2	1	1939	222.9	5.85	0	128.6	100.2	97.3	97.1	86.8	90	108.7	91.3	-	1.19058	0.170867
Q9Y6N5	SQOR	Sulfide:quinone oxidoreductase, mitochondrial OS=Homo sapiens OX=9606 GN=SQOR PE=1 SV=1	44	18	22	18	450	49.9	9.11	316	109.3	108.8	107.9	92.3	94.1	87.6	108.667	91.3333	-	1.18978	0.000939301
Q96LR5	UBE2E2	Ubiquitin-conjugating enzyme E2 E2 OS=Homo sapiens OX=9606 GN=UBE2E2 PE=1 SV=1	22	3	6	1	201	22.2	7.71	151	106.3	110.7	109	86.5	90.4	97.1	108.667	91.3333	-	1.18978	0.00663279
Q6DN14	MCTP1	Multiple C2 and transmembrane domain-containing protein 1 OS=Homo sapiens OX=9606 GN=MCTP1 PE=2 SV=2	1	1	1	1	999	111.6	8.15	0	122	102.3	101.7	96.5	86.1	91.4	108.667	91.3333	-	1.18978	0.07682
Q12792	TWF1	Twinfilin-1 OS=Homo sapiens OX=9606 GN=TWF1 PE=1 SV=3	37	11	15	8	350	40.3	6.96	280	110.8	106	109	89.7	91.5	92.9	108.6	91.3667	-	1.18862	0.000507581
P12429	ANXA3	Annexin A3 OS=Homo sapiens OX=9606 GN=ANXA3 PE=1 SV=3	67	22	43	22	323	36.4	5.92	759	107.7	109.9	108.2	91.4	91.3	91.4	108.6	91.3667	-	1.18862	1.33042e-05
Q6ZVM7	TOM1L2	TOM1-like protein 2 OS=Homo sapiens OX=9606 GN=TOM1L2 PE=1 SV=1	19	7	8	7	507	55.5	4.79	252	111.4	106.4	108	90.4	93.4	90.3	108.6	91.3667	-	1.18862	0.000652289
P78337	PITX1	Pituitary homeobox 1 OS=Homo sapiens OX=9606 GN=PITX1 PE=1 SV=2	3	1	2	1	314	34.1	8.98	0	118.7	105.5	101.7	96.9	89.3	88	108.633	91.4	-	1.18855	0.0421758
Q96K19	RNF170	E3 ubiquitin-protein ligase RNF170 OS=Homo sapiens OX=9606 GN=RNF170 PE=1 SV=2	3	1	1	1	258	29.8	5.58	0	116.4	107.1	102.4	91.1	95.8	87.3	108.633	91.4	-	1.18855	0.0228357
P49841	GSK3B	Glycogen synthase kinase-3 beta OS=Homo sapiens OX=9606 GN=GSK3B PE=1 SV=2	14	4	4	2	420	46.7	8.78	59	91	99.5	135.4	82.3	98.3	93.6	108.633	91.4	-	1.18855	0.2978
Q9UBN7	HDAC6	Histone deacetylase 6 OS=Homo sapiens OX=9606 GN=HDAC6 PE=1 SV=2	1	1	1	1	1215	131.3	5.3	52	106.3	108.8	110.7	86.6	92.1	95.5	108.6	91.4	-	1.18818	0.00399479
P10646	TFPI	Tissue factor pathway inhibitor OS=Homo sapiens OX=9606 GN=TFPI PE=1 SV=1	17	4	4	4	304	35	8.25	31	105.6	114.4	105.8	90.7	93.8	89.7	108.6	91.4	-	1.18818	0.00548317
Q9GZP9	DERL2	Derlin-2 OS=Homo sapiens OX=9606 GN=DERL2 PE=1 SV=1	21	3	4	3	239	27.5	7.28	39	108.4	109.8	107.5	91.8	92.8	89.6	108.567	91.4	-	1.18782	0.00012058
Q9BQB6	VKORC1	Vitamin K epoxide reductase complex subunit 1 OS=Homo sapiens OX=9606 GN=VKORC1 PE=1 SV=1	19	3	5	3	163	18.2	9.36	68	98.8	101.6	125.3	90	92.5	91.7	108.567	91.4	-	1.18782	0.111643
Q8NHP8	PLBD2	Putative phospholipase B-like 2 OS=Homo sapiens OX=9606 GN=PLBD2 PE=1 SV=2	11	6	6	6	589	65.4	6.8	63	116.2	103.9	105.6	90.6	92	91.6	108.567	91.4	-	1.18782	0.0113761
P40306	PSMB10	Proteasome subunit beta type-10 OS=Homo sapiens OX=9606 GN=PSMB10 PE=1 SV=1	14	3	4	3	273	28.9	7.81	131	107	109.6	109.2	93.3	92.2	88.8	108.6	91.4333	-	1.18775	0.000404553
P07108	DBI	Acyl-CoA-binding protein OS=Homo sapiens OX=9606 GN=DBI PE=1 SV=2	80	6	11	6	87	10	6.57	137	109.2	108.1	108.5	86	95.1	93.2	108.6	91.4333	-	1.18775	0.00354003
P51153	RAB13	Ras-related protein Rab-13 OS=Homo sapiens OX=9606 GN=RAB13 PE=1 SV=1	38	7	20	5	203	22.8	9.19	432	112.3	107.5	105.9	93	89.8	91.5	108.567	91.4333	-	1.18739	0.00130501
Q8IZ07	ANKRD13A	Ankyrin repeat domain-containing protein 13A OS=Homo sapiens OX=9606 GN=ANKRD13A PE=1 SV=3	11	5	6	5	590	67.6	5.02	174	112.4	106.1	107.2	93.1	91.2	90	108.567	91.4333	-	1.18739	0.00132508
Q92845	KIFAP3	Kinesin-associated protein 3 OS=Homo sapiens OX=9606 GN=KIFAP3 PE=1 SV=2	5	3	4	2	792	91.1	5.08	67	111.2	104.5	109.9	94.2	94.3	85.9	108.533	91.4667	-	1.18659	0.00783987
Q9HCE0	EPG5	Ectopic P granules protein 5 homolog OS=Homo sapiens OX=9606 GN=EPG5 PE=1 SV=2	11	20	20	20	2579	292.3	6.43	434	114.9	105.6	105.1	95	87.7	91.7	108.533	91.4667	-	1.18659	0.0111158
Q7Z5R6	APBB1IP	Amyloid beta A4 precursor protein-binding family B member 1-interacting protein OS=Homo sapiens OX=9606 GN=APBB1IP PE=1 SV=1	4	2	4	1	666	73.1	5.59	25	113.8	107.7	104	89.6	86.8	98.1	108.5	91.5	-	1.18579	0.018626
Q06828	FMOD	Fibromodulin OS=Homo sapiens OX=9606 GN=FMOD PE=1 SV=2	2	1	1	1	376	43.2	6.04	35	119.9	97.9	107.7	91.7	68.1	114.7	108.5	91.5	-	1.18579	0.317047
Q13724	MOGS	Mannosyl-oligosaccharide glucosidase OS=Homo sapiens OX=9606 GN=MOGS PE=1 SV=5	33	21	27	21	837	91.9	8.9	628	112.2	106	107.3	93	88.9	92.6	108.5	91.5	-	1.18579	0.00177184
Q8N0X7	SPART	Spartin OS=Homo sapiens OX=9606 GN=SPART PE=1 SV=1	29	17	20	17	666	72.8	5.91	336	114	105.3	106.2	84.2	93.7	96.6	108.5	91.5	-	1.18579	0.021708
Q93052	LPP	Lipoma-preferred partner OS=Homo sapiens OX=9606 GN=LPP PE=1 SV=1	37	13	18	13	612	65.7	7.37	403	108.2	106.3	111	89.9	92.8	91.9	108.5	91.5333	-	1.18536	0.000460556
O14524	NEMP1	Nuclear envelope integral membrane protein 1 OS=Homo sapiens OX=9606 GN=NEMP1 PE=1 SV=2	4	2	2	2	444	50.6	6.93	0	105.3	99.8	120.3	91.6	89.6	93.4	108.467	91.5333	-	1.185	0.0529398
Q13137	CALCOCO2	Calcium-binding and coiled-coil domain-containing protein 2 OS=Homo sapiens OX=9606 GN=CALCOCO2 PE=1 SV=1	10	4	5	4	446	52.2	5.02	100	115.1	97.2	113	89.6	83.7	101.3	108.433	91.5333	-	1.18463	0.0919821
Q9Y6K9	IKBKG	NF-kappa-B essential modulator OS=Homo sapiens OX=9606 GN=IKBKG PE=1 SV=2	30	11	13	11	419	48.2	5.71	214	100.3	103.7	121.3	90	91	93.6	108.433	91.5333	-	1.18463	0.0624853
P27797	CALR	Calreticulin OS=Homo sapiens OX=9606 GN=CALR PE=1 SV=1	75	25	120	25	417	48.1	4.44	2807	110.6	110.5	104.2	90.2	95.4	89	108.433	91.5333	-	1.18463	0.0042529
Q14435	GALNT3	Polypeptide N-acetylgalactosaminyltransferase 3 OS=Homo sapiens OX=9606 GN=GALNT3 PE=1 SV=2	20	10	12	10	633	72.6	7.99	234	110.7	107.9	106.8	95.5	89.2	90	108.467	91.5667	-	1.18456	0.00181314
Q9NVH0	EXD2	Exonuclease 3'-5' domain-containing protein 2 OS=Homo sapiens OX=9606 GN=EXD2 PE=1 SV=2	15	7	7	7	621	70.3	8.32	156	109.8	107.1	108.4	90.1	90.5	94.1	108.433	91.5667	-	1.1842	0.000348814
Q6IQ22	RAB12	Ras-related protein Rab-12 OS=Homo sapiens OX=9606 GN=RAB12 PE=1 SV=3	41	9	14	8	244	27.2	8.41	342	110.8	109.2	105.2	92.7	89.7	92.3	108.4	91.5667	-	1.18384	0.000919234
O75886	STAM2	Signal transducing adapter molecule 2 OS=Homo sapiens OX=9606 GN=STAM2 PE=1 SV=1	19	8	9	8	525	58.1	5.07	111	120.2	98.6	106.3	93	88.5	93.3	108.367	91.6	-	1.18304	0.0615738
Q96NW7	LRRC7	Leucine-rich repeat-containing protein 7 OS=Homo sapiens OX=9606 GN=LRRC7 PE=1 SV=1	2	3	4	1	1537	172.5	6.81	91	122.1	101.5	101.5	95.5	88.1	91.3	108.367	91.6333	-	1.18261	0.0805809
Q12959	DLG1	Disks large homolog 1 OS=Homo sapiens OX=9606 GN=DLG1 PE=1 SV=2	13	10	13	9	904	100.4	5.76	398	108.3	107.3	109.5	90.3	91.8	92.8	108.367	91.6333	-	1.18261	6.50552e-05
P50453	SERPINB9	Serpin B9 OS=Homo sapiens OX=9606 GN=SERPINB9 PE=1 SV=1	54	18	29	17	376	42.4	5.86	560	108.7	106.9	109.5	90.2	96.4	88.4	108.367	91.6667	-	1.18218	0.00277825
Q96PU8	QKI	Protein quaking OS=Homo sapiens OX=9606 GN=QKI PE=1 SV=1	21	5	5	5	341	37.6	8.56	69	117.2	104.9	102.8	95	87.6	92.4	108.3	91.6667	-	1.18145	0.0289569
P01023	A2M	Alpha-2-macroglobulin OS=Homo sapiens OX=9606 GN=A2M PE=1 SV=3	4	6	8	5	1474	163.2	6.46	85	94.6	137	93.3	92.5	97.5	85	108.3	91.6667	-	1.18145	0.324163
P12081	HARS	Histidine--tRNA ligase, cytoplasmic OS=Homo sapiens OX=9606 GN=HARS PE=1 SV=2	64	28	50	22	509	57.4	5.88	1099	107.5	110	107.4	88.7	92.9	93.4	108.3	91.6667	-	1.18145	0.000633927
P10301	RRAS	Ras-related protein R-Ras OS=Homo sapiens OX=9606 GN=RRAS PE=1 SV=1	47	8	16	6	218	23.5	6.93	411	111	106.5	107.5	92.4	92.9	89.8	108.333	91.7	-	1.18139	0.00056901
O95302	FKBP9	Peptidyl-prolyl cis-trans isomerase FKBP9 OS=Homo sapiens OX=9606 GN=FKBP9 PE=1 SV=2	18	9	10	9	570	63	5.08	139	111.3	106.9	106.7	93.9	92.7	88.5	108.3	91.7	-	1.18103	0.00171342
Q15714	TSC22D1	TSC22 domain family protein 1 OS=Homo sapiens OX=9606 GN=TSC22D1 PE=1 SV=3	3	4	5	2	1073	109.6	5.64	100	113.3	104.5	107.1	90.4	90.5	94.2	108.3	91.7	-	1.18103	0.00457722
P56277	CMC4	Cx9C motif-containing protein 4 OS=Homo sapiens OX=9606 GN=CMC4 PE=1 SV=1	25	1	1	1	68	7.7	8.18	19	110.5	107.9	106.5	95.8	92.7	86.6	108.3	91.7	-	1.18103	0.00487918
Q9NP72	RAB18	Ras-related protein Rab-18 OS=Homo sapiens OX=9606 GN=RAB18 PE=1 SV=1	61	10	16	10	206	23	5.24	434	106.5	110.2	108.1	91	89.6	94.6	108.267	91.7333	-	1.18023	0.000839442
Q8WWH5	TRUB1	Probable tRNA pseudouridine synthase 1 OS=Homo sapiens OX=9606 GN=TRUB1 PE=1 SV=1	3	1	1	1	349	37.2	8.25	47	88.6	92.8	143.4	91.6	90.3	93.3	108.267	91.7333	-	1.18023	0.401441
Q92783	STAM	Signal transducing adapter molecule 1 OS=Homo sapiens OX=9606 GN=STAM PE=1 SV=3	27	11	14	11	540	59.1	4.82	444	123.1	100.2	101.5	92.1	85.6	97.5	108.267	91.7333	-	1.18023	0.11348
P35914	HMGCL	Hydroxymethylglutaryl-CoA lyase, mitochondrial OS=Homo sapiens OX=9606 GN=HMGCL PE=1 SV=2	42	11	17	11	325	34.3	8.54	383	112	106.7	106	92.6	95.5	87.1	108.233	91.7333	-	1.17987	0.00604616
Q9NPH3	IL1RAP	Interleukin-1 receptor accessory protein OS=Homo sapiens OX=9606 GN=IL1RAP PE=1 SV=2	14	7	10	7	570	65.4	8.12	186	119.5	102.6	102.5	92.3	92.7	90.4	108.2	91.8	-	1.17865	0.045013
Q86VX2	COMMD7	COMM domain-containing protein 7 OS=Homo sapiens OX=9606 GN=COMMD7 PE=1 SV=2	12	2	2	2	200	22.5	5.92	111	108.8	107.1	108.6	91.3	91.8	92.4	108.167	91.8333	-	1.17786	1.26268e-05
Q8NBK3	SUMF1	Formylglycine-generating enzyme OS=Homo sapiens OX=9606 GN=SUMF1 PE=1 SV=3	4	1	1	1	374	40.5	6.65	54	111.9	104	108.5	90.7	89.9	94.9	108.133	91.8333	-	1.1775	0.00413511
P53667	LIMK1	LIM domain kinase 1 OS=Homo sapiens OX=9606 GN=LIMK1 PE=1 SV=3	4	3	3	3	647	72.5	6.98	36	110.5	104.2	109.7	90.1	91	94.4	108.133	91.8333	-	1.1775	0.00235629
P24844	MYL9	Myosin regulatory light polypeptide 9 OS=Homo sapiens OX=9606 GN=MYL9 PE=1 SV=4	66	9	26	3	172	19.8	4.92	453	113.2	107.4	103.9	89.6	95.8	90.2	108.167	91.8667	-	1.17743	0.00828384
P12277	CKB	Creatine kinase B-type OS=Homo sapiens OX=9606 GN=CKB PE=1 SV=1	38	10	21	10	381	42.6	5.59	707	109.6	106.5	108.4	90.7	90.9	94	108.167	91.8667	-	1.17743	0.000309689
Q9H9Q4	NHEJ1	Non-homologous end-joining factor 1 OS=Homo sapiens OX=9606 GN=NHEJ1 PE=1 SV=1	3	1	1	1	299	33.3	5.97	39	103.9	109.8	110.7	89	91.2	95.4	108.133	91.8667	-	1.17707	0.00460684
O00244	ATOX1	Copper transport protein ATOX1 OS=Homo sapiens OX=9606 GN=ATOX1 PE=1 SV=1	50	4	7	4	68	7.4	7.24	107	115.6	103.1	105.7	94.7	83.7	97.3	108.133	91.9	-	1.17664	0.0452256
Q96BR5	COA7	Cytochrome c oxidase assembly factor 7 OS=Homo sapiens OX=9606 GN=COA7 PE=1 SV=2	7	2	2	2	231	25.7	6.02	36	116.2	103.1	105	95.5	85.1	95.1	108.1	91.9	-	1.17628	0.0381587
Q96CP2	FLYWCH2	FLYWCH family member 2 OS=Homo sapiens OX=9606 GN=FLYWCH2 PE=1 SV=1	28	3	3	3	140	14.6	8.46	81	110.4	104.6	109.3	90.3	92.1	93.3	108.1	91.9	-	1.17628	0.00121706
Q6DD88	ATL3	Atlastin-3 OS=Homo sapiens OX=9606 GN=ATL3 PE=1 SV=1	52	21	45	20	541	60.5	5.66	1082	109	109	106.3	92.9	93.3	89.5	108.1	91.9	-	1.17628	0.000421718
O14684	PTGES	Prostaglandin E synthase OS=Homo sapiens OX=9606 GN=PTGES PE=1 SV=2	12	2	2	2	152	17.1	9.5	34	110.3	106	108	86.2	101.8	87.7	108.1	91.9	-	1.17628	0.0340884
Q92871	PMM1	Phosphomannomutase 1 OS=Homo sapiens OX=9606 GN=PMM1 PE=1 SV=2	15	3	3	3	262	29.7	5.74	50	117.1	105.7	101.4	89.2	90.9	95.6	108.067	91.9	-	1.17592	0.0330599
O43505	B4GAT1	Beta-1,4-glucuronyltransferase 1 OS=Homo sapiens OX=9606 GN=B4GAT1 PE=1 SV=1	6	2	2	2	415	47.1	7.2	19	111.9	111.9	100.5	92.2	87.6	96	108.1	91.9333	-	1.17585	0.023068
P52799	EFNB2	Ephrin-B2 OS=Homo sapiens OX=9606 GN=EFNB2 PE=1 SV=1	3	1	1	1	333	36.9	8.85	41	112.2	108.4	103.6	89.7	95.3	90.8	108.067	91.9333	-	1.17549	0.00592268
Q96DB5	RMDN1	Regulator of microtubule dynamics protein 1 OS=Homo sapiens OX=9606 GN=RMDN1 PE=1 SV=1	29	10	12	9	314	35.8	8.5	200	110.7	113.9	99.6	92.4	93.7	89.7	108.067	91.9333	-	1.17549	0.0229009
Q8N9N7	LRRC57	Leucine-rich repeat-containing protein 57 OS=Homo sapiens OX=9606 GN=LRRC57 PE=1 SV=1	38	8	11	8	239	26.7	8.43	197	107.7	105.7	110.8	91.7	92.5	91.6	108.067	91.9333	-	1.17549	0.000435513
Q86WA8	LONP2	Lon protease homolog 2, peroxisomal OS=Homo sapiens OX=9606 GN=LONP2 PE=1 SV=1	1	1	1	1	852	94.6	7.3	23	120.2	106.4	97.6	93.7	87.4	94.8	108.067	91.9667	-	1.17506	0.0820228
Q9UHA4	LAMTOR3	Ragulator complex protein LAMTOR3 OS=Homo sapiens OX=9606 GN=LAMTOR3 PE=1 SV=1	8	1	1	1	124	13.6	7.34	32	109.5	109.5	105.1	86.4	90.4	99.1	108.033	91.9667	-	1.1747	0.0162499
Q9C0F1	CEP44	Centrosomal protein of 44 kDa OS=Homo sapiens OX=9606 GN=CEP44 PE=1 SV=2	3	1	1	1	390	44.1	5.21	58	107.6	107.5	108.9	86.3	97.9	91.7	108	91.9667	-	1.17434	0.00902718
P51151	RAB9A	Ras-related protein Rab-9A OS=Homo sapiens OX=9606 GN=RAB9A PE=1 SV=1	39	5	6	5	201	22.8	5.47	236	109.8	106	108.3	90.2	90.8	95	108.033	92	-	1.17428	0.00101866
A4D1S5	RAB19	Ras-related protein Rab-19 OS=Homo sapiens OX=9606 GN=RAB19 PE=2 SV=2	5	1	2	1	217	24.4	6.52	0	122.6	100.1	101.4	94.9	90.5	90.6	108.033	92	-	1.17428	0.0972988
Q9P1Z2	CALCOCO1	Calcium-binding and coiled-coil domain-containing protein 1 OS=Homo sapiens OX=9606 GN=CALCOCO1 PE=1 SV=2	5	3	3	3	691	77.3	4.82	41	108.5	85.2	130.4	85.7	87.6	102.7	108.033	92	-	1.17428	0.319434
Q9UKK3	PARP4	Protein mono-ADP-ribosyltransferase PARP4 OS=Homo sapiens OX=9606 GN=PARP4 PE=1 SV=3	17	23	31	23	1724	192.5	5.66	451	112.9	106.5	104.6	93.7	90.9	91.4	108	92	-	1.17391	0.00381828
O76070	SNCG	Gamma-synuclein OS=Homo sapiens OX=9606 GN=SNCG PE=1 SV=2	63	6	6	6	127	13.3	4.86	87	112.5	105.7	105.8	87.5	100.4	88.1	108	92	-	1.17391	0.0284169
O95139	NDUFB6	NADH dehydrogenase [ubiquinone] 1 beta subcomplex subunit 6 OS=Homo sapiens OX=9606 GN=NDUFB6 PE=1 SV=3	20	2	2	2	128	15.5	9.63	55	111.2	104.2	108.6	90.9	93.7	91.4	108	92	-	1.17391	0.00195594
Q8N1W1	ARHGEF28	Rho guanine nucleotide exchange factor 28 OS=Homo sapiens OX=9606 GN=ARHGEF28 PE=1 SV=3	6	8	8	8	1705	191.8	6.04	153	106.2	103.1	114.7	93.5	86.9	95.7	108	92.0333	-	1.17349	0.0215497
Q99519	NEU1	Sialidase-1 OS=Homo sapiens OX=9606 GN=NEU1 PE=1 SV=1	10	4	4	4	415	45.4	5.88	29	113.1	105.4	105.4	95.3	88.5	92.3	107.967	92.0333	-	1.17313	0.00789095
Q9UFN0	NIPSNAP3A	Protein NipSnap homolog 3A OS=Homo sapiens OX=9606 GN=NIPSNAP3A PE=1 SV=2	42	8	12	8	247	28.4	9.16	143	109.5	108.2	106.2	94.1	93.6	88.4	107.967	92.0333	-	1.17313	0.00150389
Q9BYT3	STK33	Serine/threonine-protein kinase 33 OS=Homo sapiens OX=9606 GN=STK33 PE=1 SV=1	4	2	2	2	514	57.8	7.03	19	113.9	106.4	103.5	89.9	83.9	102.3	107.933	92.0333	-	1.17276	0.0634669
Q96JJ7	TMX3	Protein disulfide-isomerase TMX3 OS=Homo sapiens OX=9606 GN=TMX3 PE=1 SV=2	24	9	10	9	454	51.8	4.91	161	109.7	105.1	109	91.6	88.2	96.3	107.933	92.0333	-	1.17276	0.00444492
A0AUZ9	KANSL1L	KAT8 regulatory NSL complex subunit 1-like protein OS=Homo sapiens OX=9606 GN=KANSL1L PE=1 SV=2	1	1	1	1	987	112.2	8.44	20	123.8	102.4	97.7	97.7	78.7	99.8	107.967	92.0667	-	1.1727	0.203354
Q8TEQ8	PIGO	GPI ethanolamine phosphate transferase 3 OS=Homo sapiens OX=9606 GN=PIGO PE=1 SV=3	1	1	1	1	1089	118.6	8.12	14	106.8	97	120	86.6	95	94.6	107.933	92.0667	-	1.17234	0.0923778
Q9Y5R8	TRAPPC1	Trafficking protein particle complex subunit 1 OS=Homo sapiens OX=9606 GN=TRAPPC1 PE=1 SV=1	19	3	3	3	145	16.8	9.16	53	106.2	100.4	117.2	89.7	89.8	96.7	107.933	92.0667	-	1.17234	0.0434846
Q9UQ53	MGAT4B	Alpha-1,3-mannosyl-glycoprotein 4-beta-N-acetylglucosaminyltransferase B OS=Homo sapiens OX=9606 GN=MGAT4B PE=1 SV=1	7	3	3	3	548	63.2	7.87	52	118.6	94.7	110.5	93.3	90.9	92	107.933	92.0667	-	1.17234	0.0876458
Q9Y4K3	TRAF6	TNF receptor-associated factor 6 OS=Homo sapiens OX=9606 GN=TRAF6 PE=1 SV=1	8	3	3	3	522	59.5	6.44	76	109.2	106.8	107.8	94.7	82.7	98.8	107.933	92.0667	-	1.17234	0.0313443
Q8NB46	ANKRD52	Serine/threonine-protein phosphatase 6 regulatory ankyrin repeat subunit C OS=Homo sapiens OX=9606 GN=ANKRD52 PE=1 SV=3	5	4	4	4	1076	115	6.48	72	108.2	106.1	109.5	92.7	90.1	93.4	107.933	92.0667	-	1.17234	0.000355546
P17931	LGALS3	Galectin-3 OS=Homo sapiens OX=9606 GN=LGALS3 PE=1 SV=5	31	9	17	9	250	26.1	8.56	220	111.4	107.4	105	90.7	93.6	91.9	107.933	92.0667	-	1.17234	0.00149403
O75915	ARL6IP5	PRA1 family protein 3 OS=Homo sapiens OX=9606 GN=ARL6IP5 PE=1 SV=1	29	6	12	6	188	21.6	9.77	273	110.3	108.2	105.3	89.2	99.1	87.9	107.933	92.0667	-	1.17234	0.014246
P30044	PRDX5	Peroxiredoxin-5, mitochondrial OS=Homo sapiens OX=9606 GN=PRDX5 PE=1 SV=4	56	10	28	10	214	22.1	8.7	1008	113.1	105.6	105.1	93.3	94	88.9	107.933	92.0667	-	1.17234	0.00643133
Q9Y3D6	FIS1	Mitochondrial fission 1 protein OS=Homo sapiens OX=9606 GN=FIS1 PE=1 SV=2	35	5	12	5	152	16.9	8.79	232	107.6	106.8	109.3	89.9	93.2	93.1	107.9	92.0667	-	1.17198	0.000269285
P46937	YAP1	Transcriptional coactivator YAP1 OS=Homo sapiens OX=9606 GN=YAP1 PE=1 SV=2	27	9	16	8	504	54.4	5.17	538	105.9	106.3	111.5	91	91.7	93.6	107.9	92.1	-	1.17155	0.00129566
Q9GZY8	MFF	Mitochondrial fission factor OS=Homo sapiens OX=9606 GN=MFF PE=1 SV=1	19	3	4	3	342	38.4	8.95	143	113.8	103.9	106	93.6	89.6	93.1	107.9	92.1	-	1.17155	0.0083954
Q8WVI0	SMIM4	Small integral membrane protein 4 OS=Homo sapiens OX=9606 GN=SMIM4 PE=1 SV=2	16	1	1	1	70	8.7	10.87	0	115.7	101.3	106.7	91.2	88.8	96.3	107.9	92.1	-	1.17155	0.0291406
O43760	SYNGR2	Synaptogyrin-2 OS=Homo sapiens OX=9606 GN=SYNGR2 PE=1 SV=1	13	3	4	3	224	24.8	4.94	119	105.5	106.9	111.2	90.6	93.2	92.5	107.867	92.1	-	1.17119	0.00111197
Q15048	LRRC14	Leucine-rich repeat-containing protein 14 OS=Homo sapiens OX=9606 GN=LRRC14 PE=1 SV=1	2	1	1	1	493	54.5	6.9	29	109.4	94.4	119.8	92.9	95.5	88	107.867	92.1333	-	1.17077	0.110303
P21399	ACO1	Cytoplasmic aconitate hydratase OS=Homo sapiens OX=9606 GN=ACO1 PE=1 SV=3	44	31	50	31	889	98.3	6.68	875	111.4	105.1	107.1	88.9	95.9	91.6	107.867	92.1333	-	1.17077	0.00467058
Q32NB8	PGS1	CDP-diacylglycerol--glycerol-3-phosphate 3-phosphatidyltransferase, mitochondrial OS=Homo sapiens OX=9606 GN=PGS1 PE=2 SV=1	12	4	4	4	556	62.7	8.9	101	105.9	103.9	113.8	91.8	87.7	96.9	107.867	92.1333	-	1.17077	0.0174364
Q9BVC4	MLST8	Target of rapamycin complex subunit LST8 OS=Homo sapiens OX=9606 GN=MLST8 PE=1 SV=1	14	3	3	3	326	35.9	5.86	70	108.7	106.8	108.1	93.3	88	95.2	107.867	92.1667	-	1.17034	0.00213138
Q14165	MLEC	Malectin OS=Homo sapiens OX=9606 GN=MLEC PE=1 SV=1	45	11	19	11	292	32.2	5.41	407	109.2	109.2	105.2	91.9	93.1	91.5	107.867	92.1667	-	1.17034	0.000377771
Q13888	GTF2H2	General transcription factor IIH subunit 2 OS=Homo sapiens OX=9606 GN=GTF2H2 PE=1 SV=1	9	4	5	4	395	44.4	6.76	77	113.3	108.3	101.9	93.3	89.5	93.7	107.833	92.1667	-	1.16998	0.0116875
P08962	CD63	CD63 antigen OS=Homo sapiens OX=9606 GN=CD63 PE=1 SV=2	8	2	3	2	238	25.6	7.81	43	110.7	107.6	105.2	87.6	89.3	99.6	107.833	92.1667	-	1.16998	0.018357
Q9BXK5	BCL2L13	Bcl-2-like protein 13 OS=Homo sapiens OX=9606 GN=BCL2L13 PE=1 SV=1	20	6	7	6	485	52.7	4.44	130	110.8	107.1	105.5	93.3	92	91.2	107.8	92.1667	-	1.16962	0.000749912
P50479	PDLIM4	PDZ and LIM domain protein 4 OS=Homo sapiens OX=9606 GN=PDLIM4 PE=1 SV=2	46	12	17	12	330	35.4	7.91	326	110.8	105.1	107.5	94.5	90.1	91.9	107.8	92.1667	-	1.16962	0.0017028
P51452	DUSP3	Dual specificity protein phosphatase 3 OS=Homo sapiens OX=9606 GN=DUSP3 PE=1 SV=1	44	6	10	6	185	20.5	7.8	344	110.2	108.2	105.1	90.9	94.9	90.8	107.833	92.2	-	1.16956	0.00146259
P55210	CASP7	Caspase-7 OS=Homo sapiens OX=9606 GN=CASP7 PE=1 SV=1	14	5	5	5	303	34.3	6.07	55	109.6	101.8	112.1	91.5	89.9	95.2	107.833	92.2	-	1.16956	0.0108461
Q17RY0	CPEB4	Cytoplasmic polyadenylation element-binding protein 4 OS=Homo sapiens OX=9606 GN=CPEB4 PE=1 SV=1	9	5	6	5	729	80.1	7.18	84	115	103.3	105.1	95.3	88.6	92.7	107.8	92.2	-	1.1692	0.0194383
Q96H79	ZC3HAV1L	Zinc finger CCCH-type antiviral protein 1-like OS=Homo sapiens OX=9606 GN=ZC3HAV1L PE=1 SV=2	22	4	7	4	300	32.9	8.13	163	119.4	95.5	108.4	96.2	89	91.4	107.767	92.2	-	1.16884	0.0974382
Q14393	GAS6	Growth arrest-specific protein 6 OS=Homo sapiens OX=9606 GN=GAS6 PE=1 SV=3	2	1	1	1	678	74.9	5.69	34	118.5	99.7	105.1	94.8	94.7	87.2	107.767	92.2333	-	1.16841	0.0643649
Q8IXS6	PALM2	Paralemmin-2 OS=Homo sapiens OX=9606 GN=PALM2 PE=1 SV=3	5	1	1	1	379	42.2	5.1	40	111.5	108.1	103.6	96.9	94.5	85.3	107.733	92.2333	-	1.16805	0.0211878
Q03013	GSTM4	Glutathione S-transferase Mu 4 OS=Homo sapiens OX=9606 GN=GSTM4 PE=1 SV=3	43	8	10	2	218	25.5	5.9	176	116.8	102.2	104.2	97.1	84.5	95.2	107.733	92.2667	-	1.16763	0.0620888
Q8TD22	SFXN5	Sideroflexin-5 OS=Homo sapiens OX=9606 GN=SFXN5 PE=1 SV=1	6	1	1	1	340	37.1	9.33	58	111.5	99.9	111.8	100.7	85.7	90.4	107.733	92.2667	-	1.16763	0.0590773
Q92968	PEX13	Peroxisomal membrane protein PEX13 OS=Homo sapiens OX=9606 GN=PEX13 PE=1 SV=2	2	1	1	1	403	44.1	8.05	27	113.6	100	109.5	89.5	91.6	95.7	107.7	92.2667	-	1.16727	0.0250868
P17029	ZKSCAN1	Zinc finger protein with KRAB and SCAN domains 1 OS=Homo sapiens OX=9606 GN=ZKSCAN1 PE=1 SV=3	3	1	1	1	563	63.6	7.05	34	117.1	103.5	102.5	96.5	90.8	89.5	107.7	92.2667	-	1.16727	0.0406778
Q9HDC9	APMAP	Adipocyte plasma membrane-associated protein OS=Homo sapiens OX=9606 GN=APMAP PE=1 SV=2	46	18	31	18	416	46.5	6.16	661	107.4	110.3	105.4	93.4	93.8	89.6	107.7	92.2667	-	1.16727	0.00138731
P28161	GSTM2	Glutathione S-transferase Mu 2 OS=Homo sapiens OX=9606 GN=GSTM2 PE=1 SV=2	36	7	8	2	218	25.7	6.37	166	115.8	101.5	105.8	86.2	92.5	98.1	107.7	92.2667	-	1.16727	0.0473848
P32455	GBP1	Guanylate-binding protein 1 OS=Homo sapiens OX=9606 GN=GBP1 PE=1 SV=2	32	19	25	10	592	67.9	6.32	491	107.5	109.6	106	91.3	96.1	89.4	107.7	92.2667	-	1.16727	0.00236697
Q6WKZ4	RAB11FIP1	Rab11 family-interacting protein 1 OS=Homo sapiens OX=9606 GN=RAB11FIP1 PE=1 SV=3	11	12	13	12	1283	137.1	5.43	257	109.5	106.4	107.3	92.6	92	92.3	107.733	92.3	-	1.16721	7.95218e-05
Q13443	ADAM9	Disintegrin and metalloproteinase domain-containing protein 9 OS=Homo sapiens OX=9606 GN=ADAM9 PE=1 SV=1	16	9	10	9	819	90.5	7.52	224	113.8	106	103.3	93	92.7	91.2	107.7	92.3	-	1.16685	0.00854037
O95630	STAMBP	STAM-binding protein OS=Homo sapiens OX=9606 GN=STAMBP PE=1 SV=1	25	10	10	10	424	48	6.29	85	108.2	107.4	107.5	89.8	91.3	95.8	107.7	92.3	-	1.16685	0.00106953
P23229	ITGA6	Integrin alpha-6 OS=Homo sapiens OX=9606 GN=ITGA6 PE=1 SV=5	32	32	44	32	1130	126.5	6.61	890	110.6	105.1	107.4	93.5	93.2	90.2	107.7	92.3	-	1.16685	0.00128858
Q9HBH0	RHOF	Rho-related GTP-binding protein RhoF OS=Homo sapiens OX=9606 GN=RHOF PE=1 SV=1	31	6	6	6	211	23.6	8.65	105	106.6	112.1	104.4	93.6	93.1	90.3	107.7	92.3333	-	1.16643	0.00360314
P10109	FDX1	Adrenodoxin, mitochondrial OS=Homo sapiens OX=9606 GN=FDX1 PE=1 SV=1	29	5	5	5	184	19.4	5.83	116	112.4	103	107.7	83.4	87.6	106	107.7	92.3333	-	1.16643	0.108186
Q9NRA2	SLC17A5	Sialin OS=Homo sapiens OX=9606 GN=SLC17A5 PE=1 SV=2	7	4	4	4	495	54.6	8.27	43	109.6	105.6	107.9	92	94.3	90.7	107.7	92.3333	-	1.16643	0.00060407
Q9Y4K0	LOXL2	Lysyl oxidase homolog 2 OS=Homo sapiens OX=9606 GN=LOXL2 PE=1 SV=1	16	10	10	10	774	86.7	6.38	214	105.3	107.6	110.2	94.2	93.6	89.2	107.7	92.3333	-	1.16643	0.0019177
P55011	SLC12A2	Solute carrier family 12 member 2 OS=Homo sapiens OX=9606 GN=SLC12A2 PE=1 SV=1	3	3	3	3	1212	131.4	6.4	51	131.6	92.1	99.3	89.8	84.8	102.4	107.667	92.3333	-	1.16606	0.310826
Q9H987	SYNPO2L	Synaptopodin 2-like protein OS=Homo sapiens OX=9606 GN=SYNPO2L PE=2 SV=3	1	1	1	1	977	102.4	9.74	0	119.7	97.5	105.7	98.5	90	88.5	107.633	92.3333	-	1.1657	0.100445
P01583	IL1A	Interleukin-1 alpha OS=Homo sapiens OX=9606 GN=IL1A PE=1 SV=1	45	8	11	8	271	30.6	5.2	289	108.5	104.9	109.5	95.2	84.4	97.4	107.633	92.3333	-	1.1657	0.0228114
O14735	CDIPT	CDP-diacylglycerol--inositol 3-phosphatidyltransferase OS=Homo sapiens OX=9606 GN=CDIPT PE=1 SV=1	10	2	2	2	213	23.5	8.03	69	106.8	107.1	109	98.9	90.8	87.3	107.633	92.3333	-	1.1657	0.0119974
Q9BZC7	ABCA2	ATP-binding cassette sub-family A member 2 OS=Homo sapiens OX=9606 GN=ABCA2 PE=1 SV=4	0	1	1	1	2435	269.7	6.81	0	129.1	97.9	96	93.6	88.5	95	107.667	92.3667	-	1.16564	0.233476
Q13077	TRAF1	TNF receptor-associated factor 1 OS=Homo sapiens OX=9606 GN=TRAF1 PE=1 SV=1	16	5	7	5	416	46.1	6.11	180	107.7	107.4	107.8	93.8	95	88.3	107.633	92.3667	-	1.16528	0.00178876
Q9NRY6	PLSCR3	Phospholipid scramblase 3 OS=Homo sapiens OX=9606 GN=PLSCR3 PE=1 SV=2	15	3	6	3	295	31.6	6.65	121	110.6	103	109.3	96.1	91.6	89.4	107.633	92.3667	-	1.16528	0.00759402
Q8NDH3	NPEPL1	Probable aminopeptidase NPEPL1 OS=Homo sapiens OX=9606 GN=NPEPL1 PE=1 SV=3	15	6	6	6	523	55.8	6.87	136	114.1	103.5	105.3	93.5	91.8	91.8	107.633	92.3667	-	1.16528	0.0100796
Q96EN8	MOCOS	Molybdenum cofactor sulfurase OS=Homo sapiens OX=9606 GN=MOCOS PE=1 SV=2	15	10	12	10	888	98.1	6.7	249	107.7	105.6	109.5	94	89.1	94	107.6	92.3667	-	1.16492	0.00154836
Q969K4	ABTB1	Ankyrin repeat and BTB/POZ domain-containing protein 1 OS=Homo sapiens OX=9606 GN=ABTB1 PE=1 SV=1	7	2	2	2	478	53.9	5.33	61	100.4	92.7	129.7	91.7	95.6	89.8	107.6	92.3667	-	1.16492	0.252412
P23743	DGKA	Diacylglycerol kinase alpha OS=Homo sapiens OX=9606 GN=DGKA PE=1 SV=3	14	7	9	7	735	82.6	6.73	172	109.2	108.3	105.4	91.5	92.1	93.6	107.633	92.4	-	1.16486	0.000308436
O14717	TRDMT1	tRNA (cytosine(38)-C(5))-methyltransferase OS=Homo sapiens OX=9606 GN=TRDMT1 PE=1 SV=1	2	1	1	1	391	44.6	6.09	26	118.5	107.4	96.9	93	91.9	92.3	107.6	92.4	-	1.1645	0.0716587
P16949	STMN1	Stathmin OS=Homo sapiens OX=9606 GN=STMN1 PE=1 SV=3	79	19	58	19	149	17.3	5.97	840	108.4	107.8	106.6	89.5	93.6	94.1	107.6	92.4	-	1.1645	0.000606558
P21291	CSRP1	Cysteine and glycine-rich protein 1 OS=Homo sapiens OX=9606 GN=CSRP1 PE=1 SV=3	68	11	34	11	193	20.6	8.57	712	108.9	107.6	106.3	90.9	93.9	92.4	107.6	92.4	-	1.1645	0.000186743
Q99536	VAT1	Synaptic vesicle membrane protein VAT-1 homolog OS=Homo sapiens OX=9606 GN=VAT1 PE=1 SV=2	46	13	32	13	393	41.9	6.29	890	110.4	108	104.3	91.9	94.8	90.5	107.567	92.4	-	1.16414	0.00224195
Q9UNH6	SNX7	Sorting nexin-7 OS=Homo sapiens OX=9606 GN=SNX7 PE=1 SV=1	5	2	3	2	387	45.3	5.11	33	111.6	106.7	104.5	93.4	91.1	92.8	107.6	92.4333	-	1.16408	0.00235507
Q9Y2T2	AP3M1	AP-3 complex subunit mu-1 OS=Homo sapiens OX=9606 GN=AP3M1 PE=1 SV=1	50	15	27	12	418	46.9	6.93	673	109.6	107.8	105.4	87	96.8	93.5	107.6	92.4333	-	1.16408	0.00832254
P28676	GCA	Grancalcin OS=Homo sapiens OX=9606 GN=GCA PE=1 SV=2	20	4	6	4	217	24	5.21	148	109.2	104.2	109.3	93.3	92.9	91.1	107.567	92.4333	-	1.16372	0.00112947
Q16512	PKN1	Serine/threonine-protein kinase N1 OS=Homo sapiens OX=9606 GN=PKN1 PE=1 SV=2	22	17	20	15	942	103.9	6.37	500	111.5	105.6	105.6	92.1	92.3	92.9	107.567	92.4333	-	1.16372	0.00157815
P10176	COX8A	Cytochrome c oxidase subunit 8A, mitochondrial OS=Homo sapiens OX=9606 GN=COX8A PE=1 SV=2	13	1	1	1	69	7.6	10.24	20	104	101.5	117.2	92.3	90.6	94.4	107.567	92.4333	-	1.16372	0.0387433
Q8N6T3	ARFGAP1	ADP-ribosylation factor GTPase-activating protein 1 OS=Homo sapiens OX=9606 GN=ARFGAP1 PE=1 SV=2	46	12	19	12	406	44.6	5.66	562	115.8	102.2	104.7	96.3	85.7	95.3	107.567	92.4333	-	1.16372	0.0480351
P40121	CAPG	Macrophage-capping protein OS=Homo sapiens OX=9606 GN=CAPG PE=1 SV=2	63	14	40	14	348	38.5	6.19	1029	108.4	108.8	105.4	91.3	96.3	89.7	107.533	92.4333	-	1.16336	0.00260375
P08727	KRT19	Keratin, type I cytoskeletal 19 OS=Homo sapiens OX=9606 GN=KRT19 PE=1 SV=4	75	34	84	22	400	44.1	5.14	1789	109.3	108.5	104.9	89.6	95.6	92.2	107.567	92.4667	-	1.1633	0.00236774
Q8TAD7	OCC1	Overexpressed in colon carcinoma 1 protein OS=Homo sapiens OX=9606 GN=OCC1 PE=1 SV=2	21	1	1	1	63	6.4	6.57	29	116.2	100.3	106.2	95.1	84.2	98.1	107.567	92.4667	-	1.1633	0.0738278
Q8IWJ2	GCC2	GRIP and coiled-coil domain-containing protein 2 OS=Homo sapiens OX=9606 GN=GCC2 PE=1 SV=4	6	10	11	9	1684	195.8	5.14	246	111.4	103.1	108.1	92.8	87.9	96.7	107.533	92.4667	-	1.16294	0.0126896
Q9BTX3	TMEM208	Transmembrane protein 208 OS=Homo sapiens OX=9606 GN=TMEM208 PE=1 SV=1	16	1	1	1	173	19.6	9.26	37	98.5	112.1	112	90.6	97.4	89.4	107.533	92.4667	-	1.16294	0.0432004
O60826	CCDC22	Coiled-coil domain-containing protein 22 OS=Homo sapiens OX=9606 GN=CCDC22 PE=1 SV=1	26	13	14	13	627	70.7	6.74	289	111.1	104.6	106.9	92.7	93.3	91.4	107.533	92.4667	-	1.16294	0.00161248
Q9NVK5	FGFR1OP2	FGFR1 oncogene partner 2 OS=Homo sapiens OX=9606 GN=FGFR1OP2 PE=1 SV=1	10	2	2	2	253	29.4	6	42	107.6	102.2	112.8	90.5	93.1	93.8	107.533	92.4667	-	1.16294	0.00946019
O95881	TXNDC12	Thioredoxin domain-containing protein 12 OS=Homo sapiens OX=9606 GN=TXNDC12 PE=1 SV=1	40	6	12	6	172	19.2	5.4	350	105.6	107.7	109.2	91.4	93.4	92.6	107.5	92.4667	-	1.16258	0.000229709
Q86TI2	DPP9	Dipeptidyl peptidase 9 OS=Homo sapiens OX=9606 GN=DPP9 PE=1 SV=3	34	23	38	23	863	98.2	6.46	826	108.7	107.3	106.5	91.9	93.3	92.2	107.5	92.4667	-	1.16258	4.0792e-05
Q8N7R7	CCNYL1	Cyclin-Y-like protein 1 OS=Homo sapiens OX=9606 GN=CCNYL1 PE=1 SV=2	7	2	2	1	359	40.7	6.07	82	112.6	104.1	105.9	92.3	97	88.2	107.533	92.5	-	1.16252	0.0143128
Q8TDB6	DTX3L	E3 ubiquitin-protein ligase DTX3L OS=Homo sapiens OX=9606 GN=DTX3L PE=1 SV=1	2	1	1	1	740	83.5	8.06	49	113.4	107.4	101.7	98.6	85.2	93.8	107.5	92.5333	-	1.16174	0.0444537
Q6NUK4	REEP3	Receptor expression-enhancing protein 3 OS=Homo sapiens OX=9606 GN=REEP3 PE=1 SV=1	4	1	2	1	255	29.2	9.57	26	117.4	104.4	100.6	98.8	88.7	90.1	107.467	92.5333	-	1.16138	0.0671953
Q9H1E5	TMX4	Thioredoxin-related transmembrane protein 4 OS=Homo sapiens OX=9606 GN=TMX4 PE=1 SV=1	3	1	1	1	349	38.9	4.37	23	116.7	99.7	106	99.2	87.6	90.8	107.467	92.5333	-	1.16138	0.0690289
Q567U6	CCDC93	Coiled-coil domain-containing protein 93 OS=Homo sapiens OX=9606 GN=CCDC93 PE=1 SV=2	17	10	11	10	631	73.2	8.15	224	110.3	106.5	105.5	93.6	90.6	93.4	107.433	92.5333	-	1.16102	0.00105238
Q14118	DAG1	Dystroglycan OS=Homo sapiens OX=9606 GN=DAG1 PE=1 SV=2	10	7	8	7	895	97.4	8.56	129	111.4	101.5	109.4	90.7	92.9	94	107.433	92.5333	-	1.16102	0.00934928
Q8NC42	RNF149	E3 ubiquitin-protein ligase RNF149 OS=Homo sapiens OX=9606 GN=RNF149 PE=2 SV=2	6	1	1	1	400	43.1	6.54	32	106.2	109.2	107	94.8	91.6	91.3	107.467	92.5667	-	1.16097	0.00048561
Q24JP5	TMEM132A	Transmembrane protein 132A OS=Homo sapiens OX=9606 GN=TMEM132A PE=1 SV=1	1	1	1	1	1023	110	5.62	38	108.9	101.9	111.6	84.4	93.9	99.4	107.467	92.5667	-	1.16097	0.0469248
Q96GA7	SDSL	Serine dehydratase-like OS=Homo sapiens OX=9606 GN=SDSL PE=1 SV=1	27	6	7	6	329	34.7	6.89	163	107.8	106	108.5	94.8	91.3	91.6	107.433	92.5667	-	1.1606	0.00038088
O95292	VAPB	Vesicle-associated membrane protein-associated protein B/C OS=Homo sapiens OX=9606 GN=VAPB PE=1 SV=3	60	14	26	13	243	27.2	7.3	412	109.1	108.3	104.9	94	92.4	91.3	107.433	92.5667	-	1.1606	0.000592931
O60573	EIF4E2	Eukaryotic translation initiation factor 4E type 2 OS=Homo sapiens OX=9606 GN=EIF4E2 PE=1 SV=1	7	1	1	1	245	28.3	8.88	0	116.2	106.1	100	91.1	91.2	95.4	107.433	92.5667	-	1.1606	0.0393765
O15460	P4HA2	Prolyl 4-hydroxylase subunit alpha-2 OS=Homo sapiens OX=9606 GN=P4HA2 PE=1 SV=1	30	11	15	11	535	60.9	5.71	364	110.5	105.8	105.9	88.9	96.2	92.6	107.4	92.5667	-	1.16024	0.00477285
Q9UPQ9	TNRC6B	Trinucleotide repeat-containing gene 6B protein OS=Homo sapiens OX=9606 GN=TNRC6B PE=1 SV=4	2	2	2	2	1833	193.9	6.76	25	101.7	102.6	117.9	92.8	88.3	96.7	107.4	92.6	-	1.15983	0.0628849
Q969K7	TMEM54	Transmembrane protein 54 OS=Homo sapiens OX=9606 GN=TMEM54 PE=2 SV=1	5	1	1	1	222	23.8	7.83	19	113.4	99.7	109.1	95.7	86.9	95.2	107.4	92.6	-	1.15983	0.0403523
Q9UNW1	MINPP1	Multiple inositol polyphosphate phosphatase 1 OS=Homo sapiens OX=9606 GN=MINPP1 PE=1 SV=1	9	3	3	3	487	55	7.81	113	117.4	99.8	105	90.4	97	90.4	107.4	92.6	-	1.15983	0.0592649
Q8N5J2	MINDY1	Ubiquitin carboxyl-terminal hydrolase MINDY-1 OS=Homo sapiens OX=9606 GN=MINDY1 PE=1 SV=2	8	2	3	2	469	51.7	4.86	91	109.4	104.2	108.7	89.9	97	91	107.433	92.6333	-	1.15977	0.0057066
P06865	HEXA	Beta-hexosaminidase subunit alpha OS=Homo sapiens OX=9606 GN=HEXA PE=1 SV=2	23	12	15	11	529	60.7	5.16	182	115.9	101.9	104.3	95.7	93.8	88.3	107.367	92.6	-	1.15947	0.0384335
O14786	NRP1	Neuropilin-1 OS=Homo sapiens OX=9606 GN=NRP1 PE=1 SV=3	13	8	12	8	923	103.1	5.88	322	110.3	107.1	104.7	96.2	89.8	91.8	107.367	92.6	-	1.15947	0.00405723
Q92538	GBF1	Golgi-specific brefeldin A-resistance guanine nucleotide exchange factor 1 OS=Homo sapiens OX=9606 GN=GBF1 PE=1 SV=2	19	26	37	26	1859	206.3	5.73	811	106.7	104	111.5	91	92.9	94	107.4	92.6333	-	1.15941	0.00333648
Q8N5M1	ATPAF2	ATP synthase mitochondrial F1 complex assembly factor 2 OS=Homo sapiens OX=9606 GN=ATPAF2 PE=1 SV=1	13	2	3	2	289	32.8	7.09	100	107.6	105.4	109.2	88	93.9	96	107.4	92.6333	-	1.15941	0.00498501
P16144	ITGB4	Integrin beta-4 OS=Homo sapiens OX=9606 GN=ITGB4 PE=1 SV=5	28	38	51	38	1822	202	6.09	1101	110.6	105.8	105.8	94.2	94	89.7	107.4	92.6333	-	1.15941	0.00244197
Q68CZ2	TNS3	Tensin-3 OS=Homo sapiens OX=9606 GN=TNS3 PE=1 SV=2	11	11	12	11	1445	155.2	6.81	245	109.1	104.6	108.4	93	93	91.9	107.367	92.6333	-	1.15905	0.000521696
Q8NCF5	NFATC2IP	NFATC2-interacting protein OS=Homo sapiens OX=9606 GN=NFATC2IP PE=1 SV=1	11	3	3	3	419	45.8	6.6	81	106.2	108.7	107.2	93.4	87.2	97.3	107.367	92.6333	-	1.15905	0.00825597
O94967	WDR47	WD repeat-containing protein 47 OS=Homo sapiens OX=9606 GN=WDR47 PE=1 SV=1	3	3	3	3	919	101.9	5.94	35	104.4	113.6	104	93.1	89.9	94.9	107.333	92.6333	-	1.15869	0.0131682
Q9H2L5	RASSF4	Ras association domain-containing protein 4 OS=Homo sapiens OX=9606 GN=RASSF4 PE=1 SV=2	6	2	2	1	321	36.7	7.75	17	107.5	97.5	117	95.5	93.8	88.6	107.333	92.6333	-	1.15869	0.070451
Q9P0B6	CCDC167	Coiled-coil domain-containing protein 167 OS=Homo sapiens OX=9606 GN=CCDC167 PE=1 SV=2	24	2	3	2	97	11.5	9.5	117	115.4	99.4	107.3	88.9	89.2	99.9	107.367	92.6667	-	1.15863	0.066374
Q06481	APLP2	Amyloid-like protein 2 OS=Homo sapiens OX=9606 GN=APLP2 PE=1 SV=2	33	19	29	19	763	86.9	4.79	642	112.2	102.8	106.9	93.1	93.7	91.2	107.3	92.6667	-	1.15791	0.00659255
P40189	IL6ST	Interleukin-6 receptor subunit beta OS=Homo sapiens OX=9606 GN=IL6ST PE=1 SV=2	3	2	2	2	918	103.5	5.95	77	122.4	100.1	99.4	95.6	88.5	93.9	107.3	92.6667	-	1.15791	0.135756
Q14145	KEAP1	Kelch-like ECH-associated protein 1 OS=Homo sapiens OX=9606 GN=KEAP1 PE=1 SV=2	5	2	2	2	624	69.6	6.44	23	113.4	92.7	115.9	91.3	92.4	94.4	107.333	92.7	-	1.15786	0.119435
P30533	LRPAP1	Alpha-2-macroglobulin receptor-associated protein OS=Homo sapiens OX=9606 GN=LRPAP1 PE=1 SV=1	29	10	14	10	357	41.4	8.78	198	107.2	109.3	105.5	90.2	94.4	93.5	107.333	92.7	-	1.15786	0.000966735
Q9UBS8	RNF14	E3 ubiquitin-protein ligase RNF14 OS=Homo sapiens OX=9606 GN=RNF14 PE=1 SV=1	20	9	12	9	474	53.8	4.75	143	111.9	100.9	109.1	95.7	86.9	95.5	107.3	92.7	-	1.1575	0.0293029
Q6KCM7	SLC25A25	Calcium-binding mitochondrial carrier protein SCaMC-2 OS=Homo sapiens OX=9606 GN=SLC25A25 PE=1 SV=1	2	1	1	1	469	52.6	8.35	26	107.4	108	106.5	98.4	85.6	94.1	107.3	92.7	-	1.1575	0.0182034
Q9BQA9	CYBC1	Cytochrome b-245 chaperone 1 OS=Homo sapiens OX=9606 GN=CYBC1 PE=1 SV=1	9	2	2	2	187	20.8	6.8	33	104.6	106.6	110.7	90.8	93.8	93.5	107.3	92.7	-	1.1575	0.00199152
Q9BXB4	OSBPL11	Oxysterol-binding protein-related protein 11 OS=Homo sapiens OX=9606 GN=OSBPL11 PE=1 SV=2	5	3	5	2	747	83.6	7.06	142	108.2	106.7	106.9	88.1	92.8	97.2	107.267	92.7	-	1.15714	0.00547969
Q5T5P2	KIAA1217	Sickle tail protein homolog OS=Homo sapiens OX=9606 GN=KIAA1217 PE=1 SV=2	6	9	9	9	1943	214	7.06	182	113.3	102.5	106.1	92.6	92.3	93.3	107.3	92.7333	-	1.15708	0.0102746
Q9H7E2	TDRD3	Tudor domain-containing protein 3 OS=Homo sapiens OX=9606 GN=TDRD3 PE=1 SV=1	4	2	2	2	651	73.1	9.23	29	96.2	99.7	126	84.3	96.2	97.7	107.3	92.7333	-	1.15708	0.230774
Q02083	NAAA	N-acylethanolamine-hydrolyzing acid amidase OS=Homo sapiens OX=9606 GN=NAAA PE=1 SV=3	3	1	1	1	359	40	8.75	22	116.4	102.6	102.8	96.8	88.2	93.2	107.267	92.7333	-	1.15672	0.0491595
P67812	SEC11A	Signal peptidase complex catalytic subunit SEC11A OS=Homo sapiens OX=9606 GN=SEC11A PE=1 SV=1	20	5	10	5	179	20.6	9.48	245	106.9	109.6	105.3	90.4	93.8	94	107.267	92.7333	-	1.15672	0.00106123
Q9BRP4	PAAF1	Proteasomal ATPase-associated factor 1 OS=Homo sapiens OX=9606 GN=PAAF1 PE=1 SV=2	11	4	6	4	392	42.2	6.32	124	105	109.3	107.5	87	93.3	97.9	107.267	92.7333	-	1.15672	0.0128575
Q9P035	HACD3	Very-long-chain (3R)-3-hydroxyacyl-CoA dehydratase 3 OS=Homo sapiens OX=9606 GN=HACD3 PE=1 SV=2	25	9	13	9	362	43.1	8.94	197	107.6	108.1	106.1	87.2	97.9	93.1	107.267	92.7333	-	1.15672	0.00995023
P01344	IGF2	Insulin-like growth factor II OS=Homo sapiens OX=9606 GN=IGF2 PE=1 SV=1	9	1	1	1	180	20.1	9.32	24	103.7	96	122.1	88.4	91.9	97.9	107.267	92.7333	-	1.15672	0.151956
P09110	ACAA1	3-ketoacyl-CoA thiolase, peroxisomal OS=Homo sapiens OX=9606 GN=ACAA1 PE=1 SV=2	41	13	15	13	424	44.3	8.44	240	109.8	107.8	104.2	93.6	93.5	91.2	107.267	92.7667	-	1.15631	0.00133444
Q6UW02	CYP20A1	Cytochrome P450 20A1 OS=Homo sapiens OX=9606 GN=CYP20A1 PE=1 SV=1	29	10	11	10	462	52.4	6.21	244	105.2	107.5	109	94	89.9	94.4	107.233	92.7667	-	1.15595	0.00133842
Q00169	PITPNA	Phosphatidylinositol transfer protein alpha isoform OS=Homo sapiens OX=9606 GN=PITPNA PE=1 SV=2	59	14	17	10	270	31.8	6.55	284	109.1	109.1	103.5	91.8	92.8	93.7	107.233	92.7667	-	1.15595	0.00174703
Q9H098	FAM107B	Protein FAM107B OS=Homo sapiens OX=9606 GN=FAM107B PE=1 SV=1	39	4	6	4	131	15.5	8.29	122	107.6	108.1	106	91.5	91.5	95.3	107.233	92.7667	-	1.15595	0.000517486
Q8IXL7	MSRB3	Methionine-R-sulfoxide reductase B3 OS=Homo sapiens OX=9606 GN=MSRB3 PE=1 SV=2	5	1	1	1	192	20.7	7.33	17	108.9	105.5	107.3	91.7	95.2	91.4	107.233	92.7667	-	1.15595	0.000763153
P82664	MRPS10	28S ribosomal protein S10, mitochondrial OS=Homo sapiens OX=9606 GN=MRPS10 PE=1 SV=2	16	2	2	2	201	23	8	93	116.1	106.1	99.5	96	87.5	94.8	107.233	92.7667	-	1.15595	0.0584032
Q92542	NCSTN	Nicastrin OS=Homo sapiens OX=9606 GN=NCSTN PE=1 SV=2	13	9	11	9	709	78.4	5.99	209	110	106.6	105	93.8	91.1	93.4	107.2	92.7667	-	1.15559	0.00104903
Q08345	DDR1	Epithelial discoidin domain-containing receptor 1 OS=Homo sapiens OX=9606 GN=DDR1 PE=1 SV=1	1	1	1	1	913	101.1	6.83	36	108.4	102	111.2	87.7	94.5	96.1	107.2	92.7667	-	1.15559	0.0182813
A6NIH7	UNC119B	Protein unc-119 homolog B OS=Homo sapiens OX=9606 GN=UNC119B PE=1 SV=1	12	2	2	2	251	28.1	5.68	41	111.6	105.5	104.5	92.8	92	93.6	107.2	92.8	-	1.15517	0.00314443
Q15293	RCN1	Reticulocalbin-1 OS=Homo sapiens OX=9606 GN=RCN1 PE=1 SV=1	54	16	36	16	331	38.9	5	1053	110.3	108.3	103	92	95.5	90.9	107.2	92.8	-	1.15517	0.00506675
Q96BI3	APH1A	Gamma-secretase subunit APH-1A OS=Homo sapiens OX=9606 GN=APH1A PE=1 SV=1	5	1	1	1	265	29	7.9	42	105.7	108.2	107.7	93.2	90.3	94.9	107.2	92.8	-	1.15517	0.000737351
Q8IXQ3	C9orf40	Uncharacterized protein C9orf40 OS=Homo sapiens OX=9606 GN=C9orf40 PE=1 SV=1	22	2	2	2	194	21.1	5.01	121	108.4	104.7	108.4	98.8	88.8	90.8	107.167	92.8	-	1.15481	0.0120559
Q99805	TM9SF2	Transmembrane 9 superfamily member 2 OS=Homo sapiens OX=9606 GN=TM9SF2 PE=1 SV=1	19	9	15	9	663	75.7	7.44	247	110.1	106.5	105	93.3	92.5	92.7	107.2	92.8333	-	1.15476	0.000720784
Q63HN8	RNF213	E3 ubiquitin-protein ligase RNF213 OS=Homo sapiens OX=9606 GN=RNF213 PE=1 SV=3	6	29	33	29	5207	591	6.48	457	112.2	102	107.3	95.2	91.8	91.5	107.167	92.8333	-	1.1544	0.0107066
O00115	DNASE2	Deoxyribonuclease-2-alpha OS=Homo sapiens OX=9606 GN=DNASE2 PE=1 SV=2	10	3	3	3	360	39.6	8.05	47	113.6	101.1	106.8	93.6	89.9	95	107.167	92.8333	-	1.1544	0.0216533
P37802	TAGLN2	Transgelin-2 OS=Homo sapiens OX=9606 GN=TAGLN2 PE=1 SV=3	88	16	52	15	199	22.4	8.25	1264	108.4	106.8	106.3	89.2	100.8	88.5	107.167	92.8333	-	1.1544	0.0238149
Q7Z6K5	ARPIN	Arpin OS=Homo sapiens OX=9606 GN=ARPIN PE=1 SV=1	22	5	5	5	226	24.9	5.83	73	106.2	104.4	110.9	89.9	94.5	94.2	107.167	92.8667	-	1.15398	0.00424221
P55283	CDH4	Cadherin-4 OS=Homo sapiens OX=9606 GN=CDH4 PE=2 SV=2	6	3	3	3	916	100.2	4.82	76	100.3	110.9	110.2	86.2	91.5	100.9	107.133	92.8667	-	1.15363	0.0602657
Q9NRX5	SERINC1	Serine incorporator 1 OS=Homo sapiens OX=9606 GN=SERINC1 PE=1 SV=1	8	3	4	3	453	50.5	5.85	77	111.6	104.7	105.1	92.8	90.9	94.9	107.133	92.8667	-	1.15363	0.00477842
Q8WWI1	LMO7	LIM domain only protein 7 OS=Homo sapiens OX=9606 GN=LMO7 PE=1 SV=3	25	33	40	32	1683	192.6	8.09	904	108.8	106	106.6	93.3	89.4	96	107.133	92.9	-	1.15321	0.00245698
Q709C8	VPS13C	Vacuolar protein sorting-associated protein 13C OS=Homo sapiens OX=9606 GN=VPS13C PE=1 SV=1	12	32	35	32	3753	422.1	6.83	810	109.3	104.8	107.3	93.8	93.4	91.5	107.133	92.9	-	1.15321	0.000657836
Q9NWQ8	PAG1	Phosphoprotein associated with glycosphingolipid-enriched microdomains 1 OS=Homo sapiens OX=9606 GN=PAG1 PE=1 SV=2	5	2	2	2	432	47	4.65	56	108.2	103.2	110	93.4	90.1	95.2	107.133	92.9	-	1.15321	0.00486368
Q99715	COL12A1	Collagen alpha-1(XII) chain OS=Homo sapiens OX=9606 GN=COL12A1 PE=1 SV=2	3	6	6	6	3063	332.9	5.53	90	109.9	104.9	106.6	94.1	89.8	94.8	107.133	92.9	-	1.15321	0.00267307
P08670	VIM	Vimentin OS=Homo sapiens OX=9606 GN=VIM PE=1 SV=4	87	49	310	44	466	53.6	5.12	7577	105.5	107.7	108.1	92.3	94.2	92.2	107.1	92.9	-	1.15285	0.000165142
Q06033	ITIH3	Inter-alpha-trypsin inhibitor heavy chain H3 OS=Homo sapiens OX=9606 GN=ITIH3 PE=1 SV=2	2	2	3	2	890	99.8	5.74	65	111.9	110.3	99.1	94.6	97.1	87	107.1	92.9	-	1.15285	0.0480465
Q8IXB1	DNAJC10	DnaJ homolog subfamily C member 10 OS=Homo sapiens OX=9606 GN=DNAJC10 PE=1 SV=2	35	23	30	23	793	91	7.18	600	108.1	108.2	105	91.8	94.5	92.4	107.1	92.9	-	1.15285	0.000438062
P21580	TNFAIP3	Tumor necrosis factor alpha-induced protein 3 OS=Homo sapiens OX=9606 GN=TNFAIP3 PE=1 SV=1	5	4	4	4	790	89.6	8.22	51	109.8	102.1	109.3	96.9	88.8	93	107.067	92.9	-	1.15249	0.01427
Q9H115	NAPB	Beta-soluble NSF attachment protein OS=Homo sapiens OX=9606 GN=NAPB PE=1 SV=2	23	6	6	3	298	33.5	5.47	148	112.6	104.1	104.5	90.9	100.2	87.6	107.067	92.9	-	1.15249	0.0388802
Q7Z7M9	GALNT5	Polypeptide N-acetylgalactosaminyltransferase 5 OS=Homo sapiens OX=9606 GN=GALNT5 PE=1 SV=1	1	1	1	1	940	106.2	9.47	0	114.2	101.2	105.8	94.9	91.3	92.6	107.067	92.9333	-	1.15208	0.0231835
Q8IZA0	KIAA0319L	Dyslexia-associated protein KIAA0319-like protein OS=Homo sapiens OX=9606 GN=KIAA0319L PE=1 SV=2	5	5	5	5	1049	115.6	6.05	82	110.8	103.9	106.5	93.9	93.8	91.1	107.067	92.9333	-	1.15208	0.00307508
Q05513	PRKCZ	Protein kinase C zeta type OS=Homo sapiens OX=9606 GN=PRKCZ PE=1 SV=4	7	4	4	3	592	67.6	5.77	53	114.9	103.3	103	96.2	90	92.7	107.067	92.9667	-	1.15167	0.0307284
Q5R372	RABGAP1L	Rab GTPase-activating protein 1-like OS=Homo sapiens OX=9606 GN=RABGAP1L PE=1 SV=1	6	4	4	4	815	92.5	5.31	119	107.4	105.6	108.2	94.2	95.1	89.6	107.067	92.9667	-	1.15167	0.00165295
Q96G03	PGM2	Phosphoglucomutase-2 OS=Homo sapiens OX=9606 GN=PGM2 PE=1 SV=4	45	28	42	27	612	68.2	6.73	644	105.4	109.6	106.1	94.8	93.3	90.8	107.033	92.9667	-	1.15131	0.00128921
Q9BT67	NDFIP1	NEDD4 family-interacting protein 1 OS=Homo sapiens OX=9606 GN=NDFIP1 PE=1 SV=1	13	2	2	2	221	24.9	4.68	53	113.2	105.3	102.6	89.2	89.2	100.5	107.033	92.9667	-	1.15131	0.0462349
Q8WWN8	ARAP3	Arf-GAP with Rho-GAP domain, ANK repeat and PH domain-containing protein 3 OS=Homo sapiens OX=9606 GN=ARAP3 PE=1 SV=1	7	6	6	6	1544	169.7	7.08	198	92.3	103	125.8	95.9	89.1	93.9	107.033	92.9667	-	1.15131	0.235449
Q14156	EFR3A	Protein EFR3 homolog A OS=Homo sapiens OX=9606 GN=EFR3A PE=1 SV=2	7	5	5	5	821	92.9	6.7	101	104.5	109.6	106.9	89.1	94.8	95	107	92.9667	-	1.15095	0.00447281
O60476	MAN1A2	Mannosyl-oligosaccharide 1,2-alpha-mannosidase IB OS=Homo sapiens OX=9606 GN=MAN1A2 PE=1 SV=1	2	1	1	1	641	73	7.61	0	111.9	102.3	106.8	93.9	91.6	93.4	107	92.9667	-	1.15095	0.0080019
P45877	PPIC	Peptidyl-prolyl cis-trans isomerase C OS=Homo sapiens OX=9606 GN=PPIC PE=1 SV=1	25	3	4	3	212	22.7	8.4	144	114	102.4	104.6	93.2	89.5	96.2	107	92.9667	-	1.15095	0.0257129
O15305	PMM2	Phosphomannomutase 2 OS=Homo sapiens OX=9606 GN=PMM2 PE=1 SV=1	41	9	15	9	246	28.1	6.77	359	107	109.5	104.6	94	93.4	91.6	107.033	93	-	1.1509	0.000904705
P42356	PI4KA	Phosphatidylinositol 4-kinase alpha OS=Homo sapiens OX=9606 GN=PI4KA PE=1 SV=4	4	7	8	7	2102	236.7	7.06	173	100.7	98.1	122.2	90.4	93.4	95.2	107	93	-	1.15054	0.145705
Q9BS26	ERP44	Endoplasmic reticulum resident protein 44 OS=Homo sapiens OX=9606 GN=ERP44 PE=1 SV=1	36	14	23	13	406	46.9	5.26	297	107.7	105.2	108.1	90.7	95.2	93.1	107	93	-	1.15054	0.000907602
Q7Z3J2	VPS35L	VPS35 endosomal protein sorting factor-like OS=Homo sapiens OX=9606 GN=VPS35L PE=1 SV=2	4	3	3	3	963	109.5	7.21	43	105.4	103.1	112.5	93	95.3	90.8	107	93.0333	-	1.15013	0.0109353
Q969J3	BORCS5	BLOC-1-related complex subunit 5 OS=Homo sapiens OX=9606 GN=BORCS5 PE=1 SV=1	11	2	3	2	196	22.2	6.35	40	106.9	105.8	108.3	91.9	89.7	97.5	107	93.0333	-	1.15013	0.00455568
Q6UW56	ATRAID	All-trans retinoic acid-induced differentiation factor OS=Homo sapiens OX=9606 GN=ATRAID PE=1 SV=2	3	1	1	1	229	24.7	7.25	36	104.5	105.4	111	91.4	96.4	91.3	106.967	93.0333	-	1.14977	0.00617832
Q5RI15	COX20	Cytochrome c oxidase assembly protein COX20, mitochondrial OS=Homo sapiens OX=9606 GN=COX20 PE=1 SV=2	22	2	4	2	118	13.3	8.76	132	113.5	100.1	107.3	93.9	89.1	96.1	106.967	93.0333	-	1.14977	0.0337059
Q92997	DVL3	Segment polarity protein dishevelled homolog DVL-3 OS=Homo sapiens OX=9606 GN=DVL3 PE=1 SV=2	4	2	2	1	716	78	6.65	21	91.3	107	122.5	85.2	92.6	101.3	106.933	93.0333	-	1.14941	0.242222
Q07912	TNK2	Activated CDC42 kinase 1 OS=Homo sapiens OX=9606 GN=TNK2 PE=1 SV=3	2	1	1	1	1038	114.5	7.25	31	111.1	100	109.7	96.4	91.7	91	106.933	93.0333	-	1.14941	0.0231194
Q6PGP7	TTC37	Tetratricopeptide repeat protein 37 OS=Homo sapiens OX=9606 GN=TTC37 PE=1 SV=1	5	5	5	5	1564	175.4	7.53	116	112.3	104.5	104	90.8	92.7	95.7	106.933	93.0667	-	1.149	0.0103548
Q8TE73	DNAH5	Dynein heavy chain 5, axonemal OS=Homo sapiens OX=9606 GN=DNAH5 PE=1 SV=3	0	2	2	1	4624	528.7	6.1	0	116.2	101.2	103.4	98.4	89	91.8	106.933	93.0667	-	1.149	0.0634927
P54252	ATXN3	Ataxin-3 OS=Homo sapiens OX=9606 GN=ATXN3 PE=1 SV=5	11	3	3	3	361	41.2	4.78	74	109.6	104	107.2	92.8	90.3	96.2	106.933	93.1	-	1.14859	0.0042076
Q53GQ0	HSD17B12	Very-long-chain 3-oxoacyl-CoA reductase OS=Homo sapiens OX=9606 GN=HSD17B12 PE=1 SV=2	50	15	32	15	312	34.3	9.32	629	106.7	109.2	104.9	91.9	94.4	93	106.933	93.1	-	1.14859	0.000658933
Q9UBG0	MRC2	C-type mannose receptor 2 OS=Homo sapiens OX=9606 GN=MRC2 PE=1 SV=2	2	3	3	3	1479	166.6	5.83	32	119.2	96.9	104.6	90.8	98.5	90	106.9	93.1	-	1.14823	0.123023
P16298	PPP3CB	Serine/threonine-protein phosphatase 2B catalytic subunit beta isoform OS=Homo sapiens OX=9606 GN=PPP3CB PE=1 SV=2	18	9	11	3	524	59	5.91	151	107.7	104.8	108.1	96	91.6	91.7	106.867	93.1	-	1.14787	0.00151969
Q66LE6	PPP2R2D	Serine/threonine-protein phosphatase 2A 55 kDa regulatory subunit B delta isoform OS=Homo sapiens OX=9606 GN=PPP2R2D PE=1 SV=1	20	7	10	1	453	52	6.39	189	110.1	105.4	105.1	96.3	93.8	89.2	106.867	93.1	-	1.14787	0.00640955
O43291	SPINT2	Kunitz-type protease inhibitor 2 OS=Homo sapiens OX=9606 GN=SPINT2 PE=1 SV=2	25	6	7	6	252	28.2	8.29	77	114.4	103.9	102.4	93.7	91.9	93.8	106.9	93.1333	-	1.14782	0.022777
P13804	ETFA	Electron transfer flavoprotein subunit alpha, mitochondrial OS=Homo sapiens OX=9606 GN=ETFA PE=1 SV=1	51	13	24	13	333	35.1	8.38	810	110	106.7	104	94.3	94.4	90.7	106.9	93.1333	-	1.14782	0.00289647
Q8N2H4	SYS1	Protein SYS1 homolog OS=Homo sapiens OX=9606 GN=SYS1 PE=1 SV=1	20	2	2	2	156	17.6	7.72	109	111.2	111	98.5	93.7	91.4	94.3	106.9	93.1333	-	1.14782	0.0326746
Q8IX90	SKA3	Spindle and kinetochore-associated protein 3 OS=Homo sapiens OX=9606 GN=SKA3 PE=1 SV=2	18	5	5	5	412	46.3	5.11	99	113.1	101.2	106.3	97.4	84.5	97.5	106.867	93.1333	-	1.14746	0.0677681
Q15645	TRIP13	Pachytene checkpoint protein 2 homolog OS=Homo sapiens OX=9606 GN=TRIP13 PE=1 SV=2	41	17	23	17	432	48.5	6.09	584	108.8	108	103.8	90.6	93.4	95.4	106.867	93.1333	-	1.14746	0.00274529
Q5BKX5	C19orf54	UPF0692 protein C19orf54 OS=Homo sapiens OX=9606 GN=C19orf54 PE=1 SV=2	7	2	2	2	351	37.8	7.47	40	105.4	105.3	109.9	93.5	91.4	94.5	106.867	93.1333	-	1.14746	0.0014894
Q9Y2R0	COA3	Cytochrome c oxidase assembly factor 3 homolog, mitochondrial OS=Homo sapiens OX=9606 GN=COA3 PE=1 SV=1	39	4	4	4	106	11.7	9.6	95	116.5	101.9	102.2	93.4	88	98	106.867	93.1333	-	1.14746	0.0708531
Q9BUP3	HTATIP2	Oxidoreductase HTATIP2 OS=Homo sapiens OX=9606 GN=HTATIP2 PE=1 SV=2	49	12	13	12	242	27	8.38	241	112.3	104.4	103.9	90.3	91.3	97.9	106.867	93.1667	-	1.14705	0.0193145
Q5MNZ9	WIPI1	WD repeat domain phosphoinositide-interacting protein 1 OS=Homo sapiens OX=9606 GN=WIPI1 PE=1 SV=3	4	2	2	2	446	48.6	6.6	27	110.3	104.4	105.8	91.8	95.3	92.4	106.833	93.1667	-	1.14669	0.00278743
O43379	WDR62	WD repeat-containing protein 62 OS=Homo sapiens OX=9606 GN=WDR62 PE=1 SV=4	5	6	6	6	1518	165.8	5.91	65	102.7	106.8	111	93.1	89.5	96.9	106.833	93.1667	-	1.14669	0.0130825
Q9BQG2	NUDT12	Peroxisomal NADH pyrophosphatase NUDT12 OS=Homo sapiens OX=9606 GN=NUDT12 PE=1 SV=1	4	2	2	2	462	52	6.83	31	109.2	106.7	104.5	94.7	90.5	94.3	106.8	93.1667	-	1.14633	0.00202313
Q96A35	MRPL24	39S ribosomal protein L24, mitochondrial OS=Homo sapiens OX=9606 GN=MRPL24 PE=1 SV=1	27	6	7	6	216	24.9	9.29	135	107.6	105.6	107.3	97	91.7	90.9	106.833	93.2	-	1.14628	0.00247903
Q5H8A4	PIGG	GPI ethanolamine phosphate transferase 2 OS=Homo sapiens OX=9606 GN=PIGG PE=1 SV=1	2	2	2	2	983	108.1	7.15	0	114.9	105.2	100.3	101.3	88.1	90.2	106.8	93.2	-	1.14592	0.0835668
P31949	S100A11	Protein S100-A11 OS=Homo sapiens OX=9606 GN=S100A11 PE=1 SV=2	52	6	46	6	105	11.7	7.12	1222	109	106.9	104.5	96.7	91.8	91.1	106.8	93.2	-	1.14592	0.00341767
Q8TEY7	USP33	Ubiquitin carboxyl-terminal hydrolase 33 OS=Homo sapiens OX=9606 GN=USP33 PE=1 SV=2	1	1	1	1	942	106.7	6.02	23	98.6	91.5	130.3	97	83.2	99.4	106.8	93.2	-	1.14592	0.352941
P62879	GNB2	Guanine nucleotide-binding protein G(I)/G(S)/G(T) subunit beta-2 OS=Homo sapiens OX=9606 GN=GNB2 PE=1 SV=3	48	13	41	5	340	37.3	6	1291	105.6	108	106.8	93.5	95.8	90.3	106.8	93.2	-	1.14592	0.00144233
Q7Z5H4	VN1R5	Vomeronasal type-1 receptor 5 OS=Homo sapiens OX=9606 GN=VN1R5 PE=2 SV=2	2	1	1	1	357	40.8	9.2	0	129.2	96.3	94.9	103	83.9	92.7	106.8	93.2	-	1.14592	0.337511
P25325	MPST	3-mercaptopyruvate sulfurtransferase OS=Homo sapiens OX=9606 GN=MPST PE=1 SV=3	32	8	10	8	297	33.2	6.6	229	108.2	106.1	106.1	91.7	94.5	93.5	106.8	93.2333	-	1.14551	0.000229065
Q8NDN9	RCBTB1	RCC1 and BTB domain-containing protein 1 OS=Homo sapiens OX=9606 GN=RCBTB1 PE=1 SV=1	4	2	2	2	531	58.2	6.47	62	112.3	105.1	102.8	95.6	80.9	103.1	106.733	93.2	-	1.14521	0.130136
Q9Y4G6	TLN2	Talin-2 OS=Homo sapiens OX=9606 GN=TLN2 PE=1 SV=4	12	31	43	14	2542	271.4	5.57	820	109.6	105.5	105.2	95.4	92.4	91.9	106.767	93.2333	-	1.14516	0.00164492
P53801	PTTG1IP	Pituitary tumor-transforming gene 1 protein-interacting protein OS=Homo sapiens OX=9606 GN=PTTG1IP PE=1 SV=1	14	2	6	2	180	20.3	8.79	168	112.6	107.9	99.7	89.1	89.7	101	106.733	93.2667	-	1.14439	0.0672975
P11182	DBT	Lipoamide acyltransferase component of branched-chain alpha-keto acid dehydrogenase complex, mitochondrial OS=Homo sapiens OX=9606 GN=DBT PE=1 SV=3	18	8	9	8	482	53.5	8.51	111	104.5	106.1	109.6	91.7	93.2	94.9	106.733	93.2667	-	1.14439	0.00159135
Q8WXA3	RUFY2	RUN and FYVE domain-containing protein 2 OS=Homo sapiens OX=9606 GN=RUFY2 PE=1 SV=3	23	13	16	11	606	70	5.83	320	111.1	103.5	105.6	94.7	92.2	92.9	106.733	93.2667	-	1.14439	0.0048461
Q8IUH4	ZDHHC13	Palmitoyltransferase ZDHHC13 OS=Homo sapiens OX=9606 GN=ZDHHC13 PE=1 SV=3	2	1	1	1	622	70.8	8.07	14	111.2	104.2	104.8	88.9	95.5	95.4	106.733	93.2667	-	1.14439	0.0125963
Q8WW24	TEKT4	Tektin-4 OS=Homo sapiens OX=9606 GN=TEKT4 PE=1 SV=1	2	1	1	1	435	50.6	6.44	0	118.2	99.2	102.8	92.6	90.1	97.2	106.733	93.3	-	1.14398	0.0956657
Q8TDZ2	MICAL1	[F-actin]-monooxygenase MICAL1 OS=Homo sapiens OX=9606 GN=MICAL1 PE=1 SV=2	3	3	3	3	1067	117.8	6.4	64	114.8	104.4	100.8	88.9	97.5	93.5	106.667	93.3	-	1.14327	0.0518836
P00488	F13A1	Coagulation factor XIII A chain OS=Homo sapiens OX=9606 GN=F13A1 PE=1 SV=4	3	2	3	2	732	83.2	6.09	64	108.2	114.9	96.9	93.5	92.2	94.2	106.667	93.3	-	1.14327	0.0647214
P55196	AFDN	Afadin OS=Homo sapiens OX=9606 GN=AFDN PE=1 SV=3	22	34	44	34	1824	206.7	6.47	711	105.1	105.9	109	88.9	94.4	96.6	106.667	93.3	-	1.14327	0.00660476
Q03167	TGFBR3	Transforming growth factor beta receptor type 3 OS=Homo sapiens OX=9606 GN=TGFBR3 PE=1 SV=3	2	2	2	2	851	93.4	5.71	43	110.5	101.4	108.2	93.3	94.8	91.9	106.7	93.3333	-	1.14321	0.00946182
P48509	CD151	CD151 antigen OS=Homo sapiens OX=9606 GN=CD151 PE=1 SV=3	25	7	10	7	253	28.3	7.47	76	110.8	105	104.3	93.9	94.1	92	106.7	93.3333	-	1.14321	0.00350084
Q8N2K0	ABHD12	Lysophosphatidylserine lipase ABHD12 OS=Homo sapiens OX=9606 GN=ABHD12 PE=1 SV=2	22	7	9	7	398	45.1	8.65	170	108.8	106.6	104.6	94.7	95.5	89.8	106.667	93.3333	-	1.14286	0.00347027
Q9UI14	RABAC1	Prenylated Rab acceptor protein 1 OS=Homo sapiens OX=9606 GN=RABAC1 PE=1 SV=1	4	1	1	1	185	20.6	7.34	30	101.7	107.2	111.1	90	99.3	90.7	106.667	93.3333	-	1.14286	0.0300772
Q96KP1	EXOC2	Exocyst complex component 2 OS=Homo sapiens OX=9606 GN=EXOC2 PE=1 SV=1	23	18	22	18	924	104	6.9	366	104	102.2	113.8	93.3	94.2	92.5	106.667	93.3333	-	1.14286	0.0214778
P50454	SERPINH1	Serpin H1 OS=Homo sapiens OX=9606 GN=SERPINH1 PE=1 SV=2	61	22	73	22	418	46.4	8.69	2076	118.6	99.8	101.6	97.4	85.5	97.1	106.667	93.3333	-	1.14286	0.13592
P05787	KRT8	Keratin, type II cytoskeletal 8 OS=Homo sapiens OX=9606 GN=KRT8 PE=1 SV=7	76	42	144	33	483	53.7	5.59	2813	107.1	107.7	105.2	91.2	96.2	92.6	106.667	93.3333	-	1.14286	0.00133095
Q9HAV0	GNB4	Guanine nucleotide-binding protein subunit beta-4 OS=Homo sapiens OX=9606 GN=GNB4 PE=1 SV=3	47	13	29	6	340	37.5	6	835	104.7	105.8	109.5	92.2	93.5	94.4	106.667	93.3667	-	1.14245	0.00110642
Q15907	RAB11B	Ras-related protein Rab-11B OS=Homo sapiens OX=9606 GN=RAB11B PE=1 SV=4	50	10	23	1	218	24.5	5.94	562	106.7	109.8	103.5	88.1	100.7	91.3	106.667	93.3667	-	1.14245	0.0338655
O43237	DYNC1LI2	Cytoplasmic dynein 1 light intermediate chain 2 OS=Homo sapiens OX=9606 GN=DYNC1LI2 PE=1 SV=1	45	16	28	15	492	54.1	6.38	766	109.3	107.3	103.3	96.1	94.5	89.5	106.633	93.3667	-	1.14209	0.00753196
Q15413	RYR3	Ryanodine receptor 3 OS=Homo sapiens OX=9606 GN=RYR3 PE=1 SV=3	0	1	1	1	4870	551.7	5.68	0	105.6	106.3	108	88.3	99.5	92.3	106.633	93.3667	-	1.14209	0.0167317
Q6IA69	NADSYN1	Glutamine-dependent NAD(+) synthetase OS=Homo sapiens OX=9606 GN=NADSYN1 PE=1 SV=3	10	7	8	7	706	79.2	6.44	117	102.9	101.6	115.4	92.9	92.8	94.4	106.633	93.3667	-	1.14209	0.040142
Q92572	AP3S1	AP-3 complex subunit sigma-1 OS=Homo sapiens OX=9606 GN=AP3S1 PE=1 SV=1	37	7	12	7	193	21.7	5.39	318	107.7	106.8	105.5	89.2	96.9	94.1	106.667	93.4	-	1.14204	0.00476669
P08697	SERPINF2	Alpha-2-antiplasmin OS=Homo sapiens OX=9606 GN=SERPINF2 PE=1 SV=3	2	1	1	1	491	54.5	6.29	42	101	122.9	95.9	94.9	95.3	89.9	106.6	93.3667	-	1.14174	0.192901
Q07065	CKAP4	Cytoskeleton-associated protein 4 OS=Homo sapiens OX=9606 GN=CKAP4 PE=1 SV=2	62	35	86	35	602	66	5.92	2335	108.1	106.1	105.6	95.8	93.8	90.5	106.6	93.3667	-	1.14174	0.00154782
Q8TEA7	TBCK	TBC domain-containing protein kinase-like protein OS=Homo sapiens OX=9606 GN=TBCK PE=1 SV=4	1	1	1	1	893	100.6	6.58	32	116.8	106.1	96.9	91	91.9	97.3	106.6	93.4	-	1.14133	0.0955933
O43896	KIF1C	Kinesin-like protein KIF1C OS=Homo sapiens OX=9606 GN=KIF1C PE=1 SV=3	9	9	9	6	1103	122.9	6.9	190	107	103.7	109.1	95.9	90.1	94.2	106.6	93.4	-	1.14133	0.00479399
Q49AG3	ZBED5	Zinc finger BED domain-containing protein 5 OS=Homo sapiens OX=9606 GN=ZBED5 PE=2 SV=2	1	1	1	1	693	78.9	8.27	21	121.5	99.1	99.2	95.8	94.1	90.4	106.6	93.4333	-	1.14092	0.159016
O43504	LAMTOR5	Ragulator complex protein LAMTOR5 OS=Homo sapiens OX=9606 GN=LAMTOR5 PE=1 SV=1	33	2	2	2	91	9.6	4.87	77	106.3	102.2	111.3	85.9	92.2	102.2	106.6	93.4333	-	1.14092	0.0722563
Q9NW15	ANO10	Anoctamin-10 OS=Homo sapiens OX=9606 GN=ANO10 PE=1 SV=2	23	11	18	10	660	76.3	7.4	348	105.4	109.2	105.2	93.2	96.3	90.9	106.6	93.4667	-	1.14051	0.00296745
P27816	MAP4	Microtubule-associated protein 4 OS=Homo sapiens OX=9606 GN=MAP4 PE=1 SV=3	61	58	115	58	1152	120.9	5.43	2726	108.8	106.4	104.4	93	94.2	93.1	106.533	93.4333	-	1.14021	0.000593764
Q8IWA5	SLC44A2	Choline transporter-like protein 2 OS=Homo sapiens OX=9606 GN=SLC44A2 PE=1 SV=3	8	5	7	5	706	80.1	8.57	89	111.3	103.5	104.9	92.7	94	93.7	106.567	93.4667	-	1.14016	0.00575105
Q5D0E6	DALRD3	DALR anticodon-binding domain-containing protein 3 OS=Homo sapiens OX=9606 GN=DALRD3 PE=1 SV=2	3	2	2	2	543	59.3	7.42	43	98.2	101.3	120.2	92.9	92.4	95.1	106.567	93.4667	-	1.14016	0.131493
P15408	FOSL2	Fos-related antigen 2 OS=Homo sapiens OX=9606 GN=FOSL2 PE=1 SV=1	9	2	2	2	326	35.2	7.49	83	110.2	103.8	105.6	93.2	92.1	95.1	106.533	93.4667	-	1.1398	0.00338093
P04066	FUCA1	Tissue alpha-L-fucosidase OS=Homo sapiens OX=9606 GN=FUCA1 PE=1 SV=4	14	5	5	5	466	53.7	6.84	79	118.4	98.9	102.3	95.8	97.7	86.9	106.533	93.4667	-	1.1398	0.130097
Q9NR31	SAR1A	GTP-binding protein SAR1a OS=Homo sapiens OX=9606 GN=SAR1A PE=1 SV=1	54	8	17	5	198	22.4	6.68	493	106.4	106.1	107.1	90.7	94.4	95.3	106.533	93.4667	-	1.1398	0.000814091
O75879	GATB	Glutamyl-tRNA(Gln) amidotransferase subunit B, mitochondrial OS=Homo sapiens OX=9606 GN=GATB PE=1 SV=1	1	1	1	1	557	61.8	8.63	29	95.6	93.8	130.2	88.2	91.6	100.6	106.533	93.4667	-	1.1398	0.351744
O14662	STX16	Syntaxin-16 OS=Homo sapiens OX=9606 GN=STX16 PE=1 SV=3	22	5	7	5	325	37	6.11	171	105.1	102.3	112.1	96.2	91.1	93.2	106.5	93.5	-	1.13904	0.0164379
Q17R98	ZNF827	Zinc finger protein 827 OS=Homo sapiens OX=9606 GN=ZNF827 PE=1 SV=1	1	1	1	1	1081	119.1	6.89	0	129.6	91.2	98.7	94.5	90.4	95.6	106.5	93.5	-	1.13904	0.334489
Q9UJ70	NAGK	N-acetyl-D-glucosamine kinase OS=Homo sapiens OX=9606 GN=NAGK PE=1 SV=4	36	10	13	10	344	37.4	6.24	497	107.6	104.7	107.2	93.7	95.1	91.7	106.5	93.5	-	1.13904	0.00063262
Q8IX03	WWC1	Protein KIBRA OS=Homo sapiens OX=9606 GN=WWC1 PE=1 SV=1	8	8	8	7	1113	125.2	5.85	73	110	101.5	108	97.3	88.1	95.1	106.5	93.5	-	1.13904	0.0262801
Q9H5X1	CIAO2A	Cytosolic iron-sulfur assembly component 2A OS=Homo sapiens OX=9606 GN=CIAO2A PE=1 SV=1	23	3	4	3	160	18.3	4.88	66	105.1	105.2	109.2	92.6	93.5	94.4	106.5	93.5	-	1.13904	0.000849213
Q9Y5S2	CDC42BPB	Serine/threonine-protein kinase MRCK beta OS=Homo sapiens OX=9606 GN=CDC42BPB PE=1 SV=2	12	17	18	14	1711	194.2	6.37	275	108	104.8	106.7	91.9	94.4	94.2	106.5	93.5	-	1.13904	0.000449812
P98155	VLDLR	Very low-density lipoprotein receptor OS=Homo sapiens OX=9606 GN=VLDLR PE=1 SV=1	3	3	3	3	873	96	4.79	30	115.5	99.9	104	95	90.8	94.7	106.467	93.5	-	1.13868	0.0559579
O14967	CLGN	Calmegin OS=Homo sapiens OX=9606 GN=CLGN PE=1 SV=1	23	9	11	9	610	70	4.69	112	103.6	104.7	111.1	96.8	92.3	91.4	106.467	93.5	-	1.13868	0.0107213
P02675	FGB	Fibrinogen beta chain OS=Homo sapiens OX=9606 GN=FGB PE=1 SV=2	1	1	1	1	491	55.9	8.27	0	110.4	108.7	100.3	95.6	90.8	94.2	106.467	93.5333	-	1.13828	0.0196314
P19021	PAM	Peptidyl-glycine alpha-amidating monooxygenase OS=Homo sapiens OX=9606 GN=PAM PE=1 SV=2	2	1	1	1	973	108.3	6.42	37	109.1	99.4	110.9	95.9	89.5	95.2	106.467	93.5333	-	1.13828	0.0345279
Q9HAB8	PPCS	Phosphopantothenate--cysteine ligase OS=Homo sapiens OX=9606 GN=PPCS PE=1 SV=2	22	6	8	6	311	34	6.71	172	110.5	105.7	103.1	97.8	90.9	91.9	106.433	93.5333	-	1.13792	0.0134477
Q9P2E3	ZNFX1	NFX1-type zinc finger-containing protein 1 OS=Homo sapiens OX=9606 GN=ZNFX1 PE=2 SV=2	1	2	2	2	1918	220.1	7.3	37	114.2	97.8	107.3	90.4	90.4	99.8	106.433	93.5333	-	1.13792	0.0861418
A0MZ66	SHTN1	Shootin-1 OS=Homo sapiens OX=9606 GN=SHTN1 PE=1 SV=4	34	20	22	20	631	71.6	5.33	446	106.1	107.1	106.2	91.4	95.1	94.2	106.467	93.5667	-	1.13787	0.000370205
O00592	PODXL	Podocalyxin OS=Homo sapiens OX=9606 GN=PODXL PE=1 SV=2	10	6	10	6	558	58.6	5.49	210	109.4	105.4	104.5	93.2	94.3	93.2	106.433	93.5667	-	1.13751	0.00114981
Q14699	RFTN1	Raftlin OS=Homo sapiens OX=9606 GN=RFTN1 PE=1 SV=4	23	11	14	11	578	63.1	5.67	327	108.5	105.9	104.9	95.3	90.6	94.8	106.433	93.5667	-	1.13751	0.00218439
Q8TDJ6	DMXL2	DmX-like protein 2 OS=Homo sapiens OX=9606 GN=DMXL2 PE=1 SV=2	0	1	1	1	3036	339.4	6.38	31	111.2	94.7	113.4	99.2	90	91.5	106.433	93.5667	-	1.13751	0.121072
Q9HBK9	AS3MT	Arsenite methyltransferase OS=Homo sapiens OX=9606 GN=AS3MT PE=1 SV=3	2	1	1	1	375	41.7	6.2	18	107.9	103.8	107.6	93.3	94.7	92.7	106.433	93.5667	-	1.13751	0.000882613
Q9Y496	KIF3A	Kinesin-like protein KIF3A OS=Homo sapiens OX=9606 GN=KIF3A PE=1 SV=4	9	5	6	5	699	80	6.54	131	106.9	103.8	108.6	94.9	91.4	94.4	106.433	93.5667	-	1.13751	0.00194365
Q13509	TUBB3	Tubulin beta-3 chain OS=Homo sapiens OX=9606 GN=TUBB3 PE=1 SV=2	53	20	135	4	450	50.4	4.93	3157	106	106.2	107.2	93	94.2	93.6	106.467	93.6	-	1.13746	1.43974e-05
P84077	ARF1	ADP-ribosylation factor 1 OS=Homo sapiens OX=9606 GN=ARF1 PE=1 SV=2	78	12	51	7	181	20.7	6.8	1488	104.4	108.9	105.9	93.5	92	95.2	106.4	93.5667	-	1.13716	0.00135447
O75083	WDR1	WD repeat-containing protein 1 OS=Homo sapiens OX=9606 GN=WDR1 PE=1 SV=4	53	28	89	28	606	66.2	6.65	2534	105.4	108.4	105.4	89.7	97	94	106.4	93.5667	-	1.13716	0.00540486
Q9NQR4	NIT2	Omega-amidase NIT2 OS=Homo sapiens OX=9606 GN=NIT2 PE=1 SV=1	56	14	25	14	276	30.6	7.21	550	108	106.7	104.5	95.6	94.6	90.5	106.4	93.5667	-	1.13716	0.00233671
Q8N556	AFAP1	Actin filament-associated protein 1 OS=Homo sapiens OX=9606 GN=AFAP1 PE=1 SV=2	7	5	6	5	730	80.7	8.68	150	107	106.1	106.1	91.9	94.9	93.9	106.4	93.5667	-	1.13716	0.000160882
Q8WX93	PALLD	Palladin OS=Homo sapiens OX=9606 GN=PALLD PE=1 SV=3	16	17	25	17	1383	150.5	7.09	620	106.9	106.3	106	91.8	92.5	96.4	106.4	93.5667	-	1.13716	0.000912456
Q9NX61	TMEM161A	Transmembrane protein 161A OS=Homo sapiens OX=9606 GN=TMEM161A PE=1 SV=1	4	1	1	1	479	53.6	8.44	59	108	94.7	116.6	97.6	90.1	93.1	106.433	93.6	-	1.13711	0.129329
Q96IW7	SEC22A	Vesicle-trafficking protein SEC22a OS=Homo sapiens OX=9606 GN=SEC22A PE=1 SV=1	4	1	1	1	307	34.9	8.24	28	111.1	107.2	101	94.3	92.2	94.3	106.433	93.6	-	1.13711	0.0132064
Q8ND24	RNF214	RING finger protein 214 OS=Homo sapiens OX=9606 GN=RNF214 PE=1 SV=2	23	13	14	13	703	77.6	6.95	474	104.2	97.7	117.3	94.6	92.1	94.1	106.4	93.6	-	1.13675	0.092503
P32004	L1CAM	Neural cell adhesion molecule L1 OS=Homo sapiens OX=9606 GN=L1CAM PE=1 SV=2	15	17	18	17	1257	139.9	6.24	315	116.7	98.9	103.6	94.1	88.7	98	106.4	93.6	-	1.13675	0.0986125
P13667	PDIA4	Protein disulfide-isomerase A4 OS=Homo sapiens OX=9606 GN=PDIA4 PE=1 SV=2	63	42	122	42	645	72.9	5.07	3132	107.2	108.8	103.2	91.7	94.7	94.4	106.4	93.6	-	1.13675	0.00262635
O95273	CCNDBP1	Cyclin-D1-binding protein 1 OS=Homo sapiens OX=9606 GN=CCNDBP1 PE=1 SV=2	13	5	5	5	360	40.2	4.82	109	101.2	99.8	118.2	90.9	89.7	100.2	106.4	93.6	-	1.13675	0.132116
Q562R1	ACTBL2	Beta-actin-like protein 2 OS=Homo sapiens OX=9606 GN=ACTBL2 PE=1 SV=2	27	9	91	2	376	42	5.59	1831	118	107.9	93.3	82.5	103.6	94.7	106.4	93.6	-	1.13675	0.245935
P50897	PPT1	Palmitoyl-protein thioesterase 1 OS=Homo sapiens OX=9606 GN=PPT1 PE=1 SV=1	32	7	12	7	306	34.2	6.52	354	111.6	106.8	100.8	96.7	91.2	92.9	106.4	93.6	-	1.13675	0.0220724
Q70UQ0	IKBIP	Inhibitor of nuclear factor kappa-B kinase-interacting protein OS=Homo sapiens OX=9606 GN=IKBIP PE=1 SV=1	32	12	16	12	350	39.3	9.17	267	109.2	106.6	103.3	94.4	95.3	91.1	106.367	93.6	-	1.1364	0.0039093
P42677	RPS27	40S ribosomal protein S27 OS=Homo sapiens OX=9606 GN=RPS27 PE=1 SV=3	29	2	8	1	84	9.5	9.45	229	109.1	106.9	103.2	95.7	91.9	93.3	106.4	93.6333	-	1.13635	0.00337385
O00161	SNAP23	Synaptosomal-associated protein 23 OS=Homo sapiens OX=9606 GN=SNAP23 PE=1 SV=1	56	9	14	9	211	23.3	5.01	313	106.9	105.3	106.9	90.9	91.8	98.2	106.367	93.6333	-	1.13599	0.00570192
P40261	NNMT	Nicotinamide N-methyltransferase OS=Homo sapiens OX=9606 GN=NNMT PE=1 SV=1	24	6	8	6	264	29.6	5.74	310	109.8	104.7	104.6	92.5	96.6	91.8	106.367	93.6333	-	1.13599	0.00502484
Q9BW92	TARS2	Threonine--tRNA ligase, mitochondrial OS=Homo sapiens OX=9606 GN=TARS2 PE=1 SV=1	17	10	11	10	718	81	7.3	193	106.1	101.4	111.6	91.2	91.4	98.3	106.367	93.6333	-	1.13599	0.0276122
P30419	NMT1	Glycylpeptide N-tetradecanoyltransferase 1 OS=Homo sapiens OX=9606 GN=NMT1 PE=1 SV=2	37	16	29	12	496	56.8	7.8	698	105.8	106.9	106.4	91.2	94	95.7	106.367	93.6333	-	1.13599	0.00070425
Q9BRT2	UQCC2	Ubiquinol-cytochrome-c reductase complex assembly factor 2 OS=Homo sapiens OX=9606 GN=UQCC2 PE=1 SV=1	16	2	3	2	126	14.9	7.37	93	109.6	107.8	101.7	92.1	96.4	92.4	106.367	93.6333	-	1.13599	0.0099699
Q9H3Z4	DNAJC5	DnaJ homolog subfamily C member 5 OS=Homo sapiens OX=9606 GN=DNAJC5 PE=1 SV=1	33	6	8	6	198	22.1	5.07	210	109	107.1	103	91.7	96.1	93.1	106.367	93.6333	-	1.13599	0.00439316
O60784	TOM1	Target of Myb protein 1 OS=Homo sapiens OX=9606 GN=TOM1 PE=1 SV=2	30	9	11	9	492	53.8	4.7	320	112.4	102.4	104.2	94.2	92.2	94.5	106.333	93.6333	-	1.13564	0.0158953
O00142	TK2	Thymidine kinase 2, mitochondrial OS=Homo sapiens OX=9606 GN=TK2 PE=1 SV=4	20	4	4	4	265	31	8.46	64	107.3	104.9	106.8	91.8	93.2	95.9	106.333	93.6333	-	1.13564	0.000836509
Q9UJG1	MOSPD1	Motile sperm domain-containing protein 1 OS=Homo sapiens OX=9606 GN=MOSPD1 PE=2 SV=1	7	1	1	1	213	24.1	7.78	24	101.3	106.2	111.6	84.3	100.7	96	106.367	93.6667	-	1.13559	0.0902553
P23142	FBLN1	Fibulin-1 OS=Homo sapiens OX=9606 GN=FBLN1 PE=1 SV=4	2	1	1	1	703	77.2	5.22	23	102.4	113.5	103.2	96.8	93.6	90.6	106.367	93.6667	-	1.13559	0.0336285
P52758	RIDA	2-iminobutanoate/2-iminopropanoate deaminase OS=Homo sapiens OX=9606 GN=RIDA PE=1 SV=1	53	5	7	5	137	14.5	8.68	166	106.3	104.9	107.9	93.9	94.6	92.5	106.367	93.6667	-	1.13559	0.000282321
Q92686	NRGN	Neurogranin OS=Homo sapiens OX=9606 GN=NRGN PE=1 SV=1	19	2	2	2	78	7.6	7.87	55	107.7	102.9	108.4	91.1	93.2	96.7	106.333	93.6667	-	1.13523	0.00598018
O95674	CDS2	Phosphatidate cytidylyltransferase 2 OS=Homo sapiens OX=9606 GN=CDS2 PE=1 SV=1	15	4	5	4	445	51.4	7.09	152	109.7	106.5	102.8	89.7	99.5	91.8	106.333	93.6667	-	1.13523	0.02415
Q96B45	BORCS7	BLOC-1-related complex subunit 7 OS=Homo sapiens OX=9606 GN=BORCS7 PE=3 SV=2	16	1	1	1	106	11.7	6.79	49	110.4	107.8	100.8	89.7	96.9	94.4	106.333	93.6667	-	1.13523	0.0236232
P50416	CPT1A	Carnitine O-palmitoyltransferase 1, liver isoform OS=Homo sapiens OX=9606 GN=CPT1A PE=1 SV=2	27	18	20	18	773	88.3	8.65	304	106.6	105.9	106.5	94.5	90.8	95.7	106.333	93.6667	-	1.13523	0.00105197
Q8N4C8	MINK1	Misshapen-like kinase 1 OS=Homo sapiens OX=9606 GN=MINK1 PE=1 SV=2	8	10	10	4	1332	149.7	7.85	135	106.1	106.3	106.6	97.4	92.2	91.4	106.333	93.6667	-	1.13523	0.00256148
Q969M3	YIPF5	Protein YIPF5 OS=Homo sapiens OX=9606 GN=YIPF5 PE=1 SV=1	8	2	3	2	257	28	4.36	69	114	103.7	101.2	94.2	93.3	93.5	106.3	93.6667	-	1.13488	0.0323599
P51571	SSR4	Translocon-associated protein subunit delta OS=Homo sapiens OX=9606 GN=SSR4 PE=1 SV=1	25	4	9	4	173	19	6.15	197	109	108	102	93.2	94.4	93.5	106.333	93.7	-	1.13483	0.00467389
Q9NZ08	ERAP1	Endoplasmic reticulum aminopeptidase 1 OS=Homo sapiens OX=9606 GN=ERAP1 PE=1 SV=3	16	14	16	14	941	107.2	6.46	338	117.1	102.9	98.9	96.7	97.7	86.7	106.3	93.7	-	1.13447	0.126488
Q4G148	GXYLT1	Glucoside xylosyltransferase 1 OS=Homo sapiens OX=9606 GN=GXYLT1 PE=1 SV=2	6	3	3	3	440	50.5	8.65	29	108.9	106.6	103.4	93.1	92.5	95.5	106.3	93.7	-	1.13447	0.00237709
Q05193	DNM1	Dynamin-1 OS=Homo sapiens OX=9606 GN=DNM1 PE=1 SV=2	29	19	29	12	864	97.3	7.17	890	108.5	103.9	106.4	94.6	94.8	91.7	106.267	93.7	-	1.13412	0.00164971
Q9H5V8	CDCP1	CUB domain-containing protein 1 OS=Homo sapiens OX=9606 GN=CDCP1 PE=1 SV=3	17	12	15	12	836	92.9	7.96	266	110	102.9	105.9	95.8	92.1	93.2	106.267	93.7	-	1.13412	0.00573403
P24311	COX7B	Cytochrome c oxidase subunit 7B, mitochondrial OS=Homo sapiens OX=9606 GN=COX7B PE=1 SV=2	9	1	2	1	80	9.2	10.27	18	114.7	104.6	99.6	91.5	90.1	99.6	106.3	93.7333	-	1.13407	0.0781459
Q6VMQ6	ATF7IP	Activating transcription factor 7-interacting protein 1 OS=Homo sapiens OX=9606 GN=ATF7IP PE=1 SV=3	1	1	1	1	1270	136.3	4.7	0	85.8	89.9	143.2	95.1	87.3	98.8	106.3	93.7333	-	1.13407	0.540368
P56937	HSD17B7	3-keto-steroid reductase OS=Homo sapiens OX=9606 GN=HSD17B7 PE=1 SV=1	16	4	5	4	341	38.2	8.1	99	107.8	105.7	105.4	91.1	95.6	94.5	106.3	93.7333	-	1.13407	0.00126024
Q8WV19	SFT2D1	Vesicle transport protein SFT2A OS=Homo sapiens OX=9606 GN=SFT2D1 PE=1 SV=1	18	2	3	2	159	17.8	8.65	216	110	102.4	106.4	84.6	95	101.6	106.267	93.7333	-	1.13371	0.0815519
Q86W74	ANKRD46	Ankyrin repeat domain-containing protein 46 OS=Homo sapiens OX=9606 GN=ANKRD46 PE=1 SV=1	5	1	1	1	232	26	7.15	30	99.1	102.9	116.8	100.6	86.4	94.2	106.267	93.7333	-	1.13371	0.137671
O95372	LYPLA2	Acyl-protein thioesterase 2 OS=Homo sapiens OX=9606 GN=LYPLA2 PE=1 SV=1	54	10	17	10	231	24.7	7.23	270	106.5	106.4	105.9	95.5	93.9	91.8	106.267	93.7333	-	1.13371	0.000323446
Q8IWR0	ZC3H7A	Zinc finger CCCH domain-containing protein 7A OS=Homo sapiens OX=9606 GN=ZC3H7A PE=1 SV=1	3	2	2	2	971	110.5	7.3	13	112.4	96.3	110.1	94	91.6	95.6	106.267	93.7333	-	1.13371	0.0720632
Q9HB40	SCPEP1	Retinoid-inducible serine carboxypeptidase OS=Homo sapiens OX=9606 GN=SCPEP1 PE=1 SV=1	9	3	3	3	452	50.8	5.81	105	117.1	100.5	101.2	95.2	94.6	91.4	106.267	93.7333	-	1.13371	0.086741
Q12899	TRIM26	Tripartite motif-containing protein 26 OS=Homo sapiens OX=9606 GN=TRIM26 PE=1 SV=1	2	1	1	1	539	62.1	5.03	40	111.3	109.8	97.6	82.1	85.2	113.9	106.233	93.7333	-	1.13336	0.319783
Q96BQ5	CCDC127	Coiled-coil domain-containing protein 127 OS=Homo sapiens OX=9606 GN=CCDC127 PE=1 SV=1	13	4	4	4	260	30.8	9.2	57	106.4	105.6	106.7	93.2	92.6	95.4	106.233	93.7333	-	1.13336	0.000164333
P30740	SERPINB1	Leukocyte elastase inhibitor OS=Homo sapiens OX=9606 GN=SERPINB1 PE=1 SV=1	53	20	36	20	379	42.7	6.28	868	109.9	106.6	102.3	93.8	96.7	90.8	106.267	93.7667	-	1.13331	0.0108859
Q9H3H5	DPAGT1	UDP-N-acetylglucosamine--dolichyl-phosphate N-acetylglucosaminephosphotransferase OS=Homo sapiens OX=9606 GN=DPAGT1 PE=1 SV=2	2	1	1	1	408	46.1	8	0	104.2	111.3	103.2	100.5	90.1	90.7	106.233	93.7667	-	1.13295	0.041992
P51809	VAMP7	Vesicle-associated membrane protein 7 OS=Homo sapiens OX=9606 GN=VAMP7 PE=1 SV=3	52	10	11	10	220	24.9	8.6	212	108.5	107	103.2	90.6	93.2	97.5	106.233	93.7667	-	1.13295	0.00818117
Q96KC8	DNAJC1	DnaJ homolog subfamily C member 1 OS=Homo sapiens OX=9606 GN=DNAJC1 PE=1 SV=1	16	7	9	7	554	63.8	8.63	128	107.6	104.9	106.2	92.4	93.6	95.3	106.233	93.7667	-	1.13295	0.000406677
Q8TF42	UBASH3B	Ubiquitin-associated and SH3 domain-containing protein B OS=Homo sapiens OX=9606 GN=UBASH3B PE=1 SV=2	6	4	5	4	649	72.6	6.93	120	106.3	105.6	106.7	98.1	91.8	91.4	106.2	93.7667	-	1.1326	0.00477703
Q8WVQ1	CANT1	Soluble calcium-activated nucleotidase 1 OS=Homo sapiens OX=9606 GN=CANT1 PE=1 SV=1	6	2	2	2	401	44.8	6.09	67	111.9	103.9	102.8	93.5	92.5	95.3	106.2	93.7667	-	1.1326	0.0140429
O60493	SNX3	Sorting nexin-3 OS=Homo sapiens OX=9606 GN=SNX3 PE=1 SV=3	44	9	14	7	162	18.8	8.66	180	114.4	100.9	103.4	93.1	91.6	96.7	106.233	93.8	-	1.13255	0.0479879
Q9UGV2	NDRG3	Protein NDRG3 OS=Homo sapiens OX=9606 GN=NDRG3 PE=1 SV=2	35	7	9	7	375	41.4	5.31	342	109.6	105.5	103.6	96.9	95.3	89.2	106.233	93.8	-	1.13255	0.0133652
Q86V85	GPR180	Integral membrane protein GPR180 OS=Homo sapiens OX=9606 GN=GPR180 PE=2 SV=1	2	1	1	1	440	49.4	7.39	24	113.3	108.8	96.5	93.5	95.9	92	106.2	93.8	-	1.1322	0.0736513
O00151	PDLIM1	PDZ and LIM domain protein 1 OS=Homo sapiens OX=9606 GN=PDLIM1 PE=1 SV=4	79	17	35	17	329	36	7.02	962	108.7	105.9	104	91.5	95.6	94.3	106.2	93.8	-	1.1322	0.00244513
P50281	MMP14	Matrix metalloproteinase-14 OS=Homo sapiens OX=9606 GN=MMP14 PE=1 SV=3	23	13	17	12	582	65.9	7.77	257	110.2	106.4	102	93.4	93.7	94.3	106.2	93.8	-	1.1322	0.0065099
O95352	ATG7	Ubiquitin-like modifier-activating enzyme ATG7 OS=Homo sapiens OX=9606 GN=ATG7 PE=1 SV=1	18	10	10	10	703	77.9	6.24	202	109.9	104.5	104.1	94.6	93	93.9	106.167	93.8333	-	1.13144	0.00305877
Q86YV9	HPS6	Hermansky-Pudlak syndrome 6 protein OS=Homo sapiens OX=9606 GN=HPS6 PE=1 SV=1	3	1	1	1	775	82.9	6.28	63	116.5	97.8	104.2	90.4	99.5	91.6	106.167	93.8333	-	1.13144	0.11691
P15374	UCHL3	Ubiquitin carboxyl-terminal hydrolase isozyme L3 OS=Homo sapiens OX=9606 GN=UCHL3 PE=1 SV=1	60	12	34	12	230	26.2	4.92	572	107.7	106.1	104.7	92.4	94.7	94.4	106.167	93.8333	-	1.13144	0.000397301
Q16527	CSRP2	Cysteine and glycine-rich protein 2 OS=Homo sapiens OX=9606 GN=CSRP2 PE=1 SV=3	49	8	10	8	193	20.9	8.62	287	106.9	103.6	107.9	92.5	92	97	106.133	93.8333	-	1.13108	0.00390467
Q96RW7	HMCN1	Hemicentin-1 OS=Homo sapiens OX=9606 GN=HMCN1 PE=1 SV=2	0	1	4	1	5635	613	6.49	0	110.6	103.8	104	96.5	89.7	95.4	106.133	93.8667	-	1.13068	0.0162094
Q9BZ29	DOCK9	Dedicator of cytokinesis protein 9 OS=Homo sapiens OX=9606 GN=DOCK9 PE=1 SV=2	12	21	25	21	2069	236.3	7.49	471	108.8	104.6	105	96.7	93.4	91.5	106.133	93.8667	-	1.13068	0.00374589
P27144	AK4	Adenylate kinase 4, mitochondrial OS=Homo sapiens OX=9606 GN=AK4 PE=1 SV=1	36	8	10	8	223	25.3	8.4	165	110.7	104.7	102.9	92.5	96	93.1	106.1	93.8667	-	1.13033	0.00919615
O75901	RASSF9	Ras association domain-containing protein 9 OS=Homo sapiens OX=9606 GN=RASSF9 PE=2 SV=2	2	1	1	1	435	50	5.31	24	118.2	102.3	97.8	89.9	96	95.7	106.1	93.8667	-	1.13033	0.132901
Q9Y320	TMX2	Thioredoxin-related transmembrane protein 2 OS=Homo sapiens OX=9606 GN=TMX2 PE=1 SV=1	34	9	10	9	296	34	8.69	167	102	101.6	114.7	87.1	93.6	100.9	106.1	93.8667	-	1.13033	0.105302
Q8N3C0	ASCC3	Activating signal cointegrator 1 complex subunit 3 OS=Homo sapiens OX=9606 GN=ASCC3 PE=1 SV=3	10	19	19	19	2202	251.3	7.09	255	108.3	102.4	107.6	94.1	93.6	93.9	106.1	93.8667	-	1.13033	0.00280326
Q8NHP6	MOSPD2	Motile sperm domain-containing protein 2 OS=Homo sapiens OX=9606 GN=MOSPD2 PE=1 SV=1	6	3	4	3	518	59.7	5.96	36	108	105.6	104.8	92.4	92.3	97	106.133	93.9	-	1.13028	0.00257332
P06703	S100A6	Protein S100-A6 OS=Homo sapiens OX=9606 GN=S100A6 PE=1 SV=1	53	5	24	5	90	10.2	5.48	168	106.1	105.6	106.7	86.8	101.9	93	106.133	93.9	-	1.13028	0.0495999
P13796	LCP1	Plastin-2 OS=Homo sapiens OX=9606 GN=LCP1 PE=1 SV=6	71	39	112	32	627	70.2	5.43	2595	108.3	105.8	104.2	96.7	94	91	106.1	93.9	-	1.12993	0.00388062
Q9H2D6	TRIOBP	TRIO and F-actin-binding protein OS=Homo sapiens OX=9606 GN=TRIOBP PE=1 SV=3	7	13	14	12	2365	261.2	8.48	253	107	104.7	106.6	95.2	94.2	92.3	106.1	93.9	-	1.12993	0.000386076
Q13438	OS9	Protein OS-9 OS=Homo sapiens OX=9606 GN=OS9 PE=1 SV=1	7	4	4	4	667	75.5	4.87	50	102.5	96.3	119.6	92.5	93.4	95.9	106.133	93.9333	-	1.12988	0.15818
P06396	GSN	Gelsolin OS=Homo sapiens OX=9606 GN=GSN PE=1 SV=1	34	22	45	22	782	85.6	6.28	1353	107.9	106.9	103.4	93.8	101.7	86.2	106.067	93.9	-	1.12957	0.0599988
Q13459	MYO9B	Unconventional myosin-IXb OS=Homo sapiens OX=9606 GN=MYO9B PE=1 SV=3	10	17	19	17	2157	243.2	8.75	411	105.6	105	107.6	95.6	92.5	93.6	106.067	93.9	-	1.12957	0.000533563
O60337	MARCH6	E3 ubiquitin-protein ligase MARCH6 OS=Homo sapiens OX=9606 GN=MARCH6 PE=1 SV=2	2	2	2	2	910	102.5	6.28	26	107	103.8	107.4	91.8	92.8	97.1	106.067	93.9	-	1.12957	0.00359167
P25686	DNAJB2	DnaJ homolog subfamily B member 2 OS=Homo sapiens OX=9606 GN=DNAJB2 PE=1 SV=3	13	3	5	2	324	35.6	5.95	111	109.8	102.8	105.7	84.4	98.8	98.6	106.1	93.9333	-	1.12952	0.0786781
O60437	PPL	Periplakin OS=Homo sapiens OX=9606 GN=PPL PE=1 SV=4	1	1	1	1	1756	204.6	5.6	29	107.1	107.2	104	91.6	95.8	94.4	106.1	93.9333	-	1.12952	0.00168623
Q0ZGT2	NEXN	Nexilin OS=Homo sapiens OX=9606 GN=NEXN PE=1 SV=1	6	4	4	4	675	80.6	5.33	105	102.7	106.1	109.5	96.1	89.2	96.5	106.1	93.9333	-	1.12952	0.0167603
O43861	ATP9B	Probable phospholipid-transporting ATPase IIB OS=Homo sapiens OX=9606 GN=ATP9B PE=2 SV=4	1	1	1	1	1147	129.2	7.61	40	105	108.6	104.6	91.1	95.5	95.2	106.067	93.9333	-	1.12917	0.00312116
Q9UPT5	EXOC7	Exocyst complex component 7 OS=Homo sapiens OX=9606 GN=EXOC7 PE=1 SV=3	15	9	11	9	735	83.3	6.79	241	111.2	102.2	104.7	93.8	94.8	93.2	106.033	93.9333	-	1.12881	0.0112957
O95406	CNIH1	Protein cornichon homolog 1 OS=Homo sapiens OX=9606 GN=CNIH1 PE=1 SV=1	20	1	1	1	144	16.7	5.71	20	117.2	101.5	99.4	91.7	91.6	98.5	106.033	93.9333	-	1.12881	0.116671
P56199	ITGA1	Integrin alpha-1 OS=Homo sapiens OX=9606 GN=ITGA1 PE=1 SV=2	4	5	5	5	1179	130.8	6.29	51	108.6	106.5	103	89.9	98.7	93.2	106.033	93.9333	-	1.12881	0.0164387
P18440	NAT1	Arylamine N-acetyltransferase 1 OS=Homo sapiens OX=9606 GN=NAT1 PE=1 SV=2	33	7	7	7	290	33.9	6.54	142	109.1	104.6	104.5	95.5	94	92.4	106.067	93.9667	-	1.12877	0.00235163
O75420	GIGYF1	GRB10-interacting GYF protein 1 OS=Homo sapiens OX=9606 GN=GIGYF1 PE=1 SV=2	1	1	1	1	1035	114.5	5.39	22	101.2	111.1	105.9	92.9	96.4	92.6	106.067	93.9667	-	1.12877	0.0176507
Q9BV40	VAMP8	Vesicle-associated membrane protein 8 OS=Homo sapiens OX=9606 GN=VAMP8 PE=1 SV=1	41	5	7	5	100	11.4	7.34	135	106.2	102.8	109.1	94.1	95.3	92.5	106.033	93.9667	-	1.12841	0.00375612
P11047	LAMC1	Laminin subunit gamma-1 OS=Homo sapiens OX=9606 GN=LAMC1 PE=1 SV=3	13	17	20	17	1609	177.5	5.12	411	106.3	105.9	105.9	96.5	93.2	92.2	106.033	93.9667	-	1.12841	0.000762708
Q86Y39	NDUFA11	NADH dehydrogenase [ubiquinone] 1 alpha subcomplex subunit 11 OS=Homo sapiens OX=9606 GN=NDUFA11 PE=1 SV=3	16	1	1	1	141	14.8	8.72	49	103.5	109.4	105.1	96.8	85.4	99.7	106	93.9667	-	1.12806	0.0628541
Q8IWD4	CCDC117	Coiled-coil domain-containing protein 117 OS=Homo sapiens OX=9606 GN=CCDC117 PE=1 SV=1	3	1	1	1	279	30.5	5.07	0	104.7	103.2	110.2	95	89.6	97.4	106.033	94	-	1.12801	0.0185454
Q8N653	LZTR1	Leucine-zipper-like transcriptional regulator 1 OS=Homo sapiens OX=9606 GN=LZTR1 PE=1 SV=2	2	1	1	1	840	94.7	6.57	22	95.3	96.3	126.5	100	91.8	90.2	106.033	94	-	1.12801	0.322797
Q8NFW8	CMAS	N-acylneuraminate cytidylyltransferase OS=Homo sapiens OX=9606 GN=CMAS PE=1 SV=2	43	16	19	16	434	48.3	7.93	281	103.7	106.7	107.6	94.6	93.1	94.3	106	94	-	1.12766	0.000688909
Q8N697	SLC15A4	Solute carrier family 15 member 4 OS=Homo sapiens OX=9606 GN=SLC15A4 PE=1 SV=1	4	2	2	2	577	62	9	52	105.4	108.2	104.4	91.8	91.8	98.4	106	94	-	1.12766	0.00836703
P37173	TGFBR2	TGF-beta receptor type-2 OS=Homo sapiens OX=9606 GN=TGFBR2 PE=1 SV=2	2	1	1	1	567	64.5	5.9	0	108.8	103.5	105.7	93.7	94.6	93.7	106	94	-	1.12766	0.00156011
Q9BXS9	SLC26A6	Solute carrier family 26 member 6 OS=Homo sapiens OX=9606 GN=SLC26A6 PE=1 SV=1	1	1	1	1	759	82.9	8.37	14	104.3	101.4	112.3	84.4	96.4	101.2	106	94	-	1.12766	0.11458
Q9BYC9	MRPL20	39S ribosomal protein L20, mitochondrial OS=Homo sapiens OX=9606 GN=MRPL20 PE=1 SV=1	7	1	2	1	149	17.4	10.86	59	111.8	102.3	103.8	91.7	94.4	95.9	105.967	94	-	1.1273	0.0200149
O95164	UBL3	Ubiquitin-like protein 3 OS=Homo sapiens OX=9606 GN=UBL3 PE=1 SV=1	22	3	3	3	117	13.1	6.77	109	105.2	101.8	111	96.1	90.2	95.8	106	94.0333	-	1.12726	0.022248
Q96AJ9	VTI1A	Vesicle transport through interaction with t-SNAREs homolog 1A OS=Homo sapiens OX=9606 GN=VTI1A PE=1 SV=2	27	5	7	5	217	25.2	6.4	114	107.5	104.1	106.4	93.1	92.7	96.3	106	94.0333	-	1.12726	0.00139632
O60583	CCNT2	Cyclin-T2 OS=Homo sapiens OX=9606 GN=CCNT2 PE=1 SV=2	4	3	3	1	730	81	8.92	20	111.3	100.5	106.1	95.6	91.3	95.2	105.967	94.0333	-	1.12691	0.0248307
Q8WUF5	PPP1R13L	RelA-associated inhibitor OS=Homo sapiens OX=9606 GN=PPP1R13L PE=1 SV=4	29	19	20	19	828	89	6.81	348	106.7	103.1	108.1	95	91.6	95.5	105.967	94.0333	-	1.12691	0.00346629
Q9H4B7	TUBB1	Tubulin beta-1 chain OS=Homo sapiens OX=9606 GN=TUBB1 PE=1 SV=1	16	8	25	2	451	50.3	5.17	217	107	100.8	110.1	92	99	91.1	105.967	94.0333	-	1.12691	0.0321886
Q12802	AKAP13	A-kinase anchor protein 13 OS=Homo sapiens OX=9606 GN=AKAP13 PE=1 SV=2	11	20	21	20	2813	307.4	5.24	430	109.1	102.9	105.9	94.3	94.5	93.3	105.967	94.0333	-	1.12691	0.00284514
Q9Y672	ALG6	Dolichyl pyrophosphate Man9GlcNAc2 alpha-1,3-glucosyltransferase OS=Homo sapiens OX=9606 GN=ALG6 PE=1 SV=2	2	1	1	1	507	58.1	8.46	17	104.2	111.6	102	94.5	89.3	98.3	105.933	94.0333	-	1.12655	0.0380758
Q6ZS30	NBEAL1	Neurobeachin-like protein 1 OS=Homo sapiens OX=9606 GN=NBEAL1 PE=2 SV=3	1	1	1	1	2694	307	6.44	30	108.5	109.7	99.6	95.2	92.9	94	105.933	94.0333	-	1.12655	0.021638
Q9BRF8	CPPED1	Serine/threonine-protein phosphatase CPPED1 OS=Homo sapiens OX=9606 GN=CPPED1 PE=1 SV=3	33	9	14	9	314	35.5	6.2	384	106.6	107.8	103.4	93.9	94.7	93.5	105.933	94.0333	-	1.12655	0.000939503
Q9UHQ4	BCAP29	B-cell receptor-associated protein 29 OS=Homo sapiens OX=9606 GN=BCAP29 PE=1 SV=2	16	6	6	6	241	28.3	9.54	33	101	111.2	105.6	89.2	95.9	97	105.933	94.0333	-	1.12655	0.0358638
Q9UKG1	APPL1	DCC-interacting protein 13-alpha OS=Homo sapiens OX=9606 GN=APPL1 PE=1 SV=1	16	9	9	8	709	79.6	5.41	194	106.9	105.7	105.3	94.2	93.7	94.3	105.967	94.0667	-	1.12651	2.08384e-05
P20962	PTMS	Parathymosin OS=Homo sapiens OX=9606 GN=PTMS PE=1 SV=2	23	2	4	2	102	11.5	4.16	68	99.1	124.3	94.5	91.6	102.3	88.3	105.967	94.0667	-	1.12651	0.307358
O43166	SIPA1L1	Signal-induced proliferation-associated 1-like protein 1 OS=Homo sapiens OX=9606 GN=SIPA1L1 PE=1 SV=4	1	2	2	2	1804	199.9	8.19	26	95.7	105.3	116.8	100.6	91.7	89.9	105.933	94.0667	-	1.12615	0.162389
Q15036	SNX17	Sorting nexin-17 OS=Homo sapiens OX=9606 GN=SNX17 PE=1 SV=1	26	10	12	10	470	52.9	7.46	315	111	100.7	106.1	94	89.9	98.3	105.933	94.0667	-	1.12615	0.0365023
Q9UHG3	PCYOX1	Prenylcysteine oxidase 1 OS=Homo sapiens OX=9606 GN=PCYOX1 PE=1 SV=3	33	13	20	13	505	56.6	6.18	435	109.5	105.5	102.8	91.2	98.6	92.4	105.933	94.0667	-	1.12615	0.0168805
P30519	HMOX2	Heme oxygenase 2 OS=Homo sapiens OX=9606 GN=HMOX2 PE=1 SV=2	69	17	28	17	316	36	5.41	740	106.5	105.4	105.9	94.2	92.4	95.6	105.933	94.0667	-	1.12615	0.000266018
Q9H3K6	BOLA2	BolA-like protein 2 OS=Homo sapiens OX=9606 GN=BOLA2 PE=1 SV=1	70	5	7	5	86	10.1	6.52	169	100	103.7	114.1	93.3	93.5	95.4	105.933	94.0667	-	1.12615	0.0499795
P27105	STOM	Erythrocyte band 7 integral membrane protein OS=Homo sapiens OX=9606 GN=STOM PE=1 SV=3	13	3	3	3	288	31.7	7.88	65	109.1	100	108.6	93.4	88.8	100	105.9	94.0667	-	1.1258	0.0544078
P28072	PSMB6	Proteasome subunit beta type-6 OS=Homo sapiens OX=9606 GN=PSMB6 PE=1 SV=4	53	9	24	9	239	25.3	4.92	532	96.3	96	125.5	95.3	93.4	93.6	105.933	94.1	-	1.12575	0.293857
Q8NDM7	CFAP43	Cilia- and flagella-associated protein 43 OS=Homo sapiens OX=9606 GN=CFAP43 PE=2 SV=3	0	1	1	1	1665	191.9	5.99	0	108.8	103.8	105.2	100.6	90.1	91.6	105.933	94.1	-	1.12575	0.0303278
Q92696	RABGGTA	Geranylgeranyl transferase type-2 subunit alpha OS=Homo sapiens OX=9606 GN=RABGGTA PE=1 SV=2	31	15	19	15	567	65	5.67	388	107.3	106	104.5	92.5	97.1	92.7	105.933	94.1	-	1.12575	0.00226461
P20020	ATP2B1	Plasma membrane calcium-transporting ATPase 1 OS=Homo sapiens OX=9606 GN=ATP2B1 PE=1 SV=4	20	22	35	13	1220	134.6	5.91	967	106.9	107.9	102.9	96.6	94.6	91.1	105.9	94.1	-	1.1254	0.00599888
Q14914	PTGR1	Prostaglandin reductase 1 OS=Homo sapiens OX=9606 GN=PTGR1 PE=1 SV=2	37	10	12	10	329	35.8	8.29	204	106.7	107.1	103.9	91.5	93.1	97.7	105.9	94.1	-	1.1254	0.00504644
Q96CM8	ACSF2	Medium-chain acyl-CoA ligase ACSF2, mitochondrial OS=Homo sapiens OX=9606 GN=ACSF2 PE=1 SV=2	12	7	7	7	615	68.1	7.55	126	112.4	103.4	101.9	94	93.9	94.4	105.9	94.1	-	1.1254	0.0228583
Q9H840	GEMIN7	Gem-associated protein 7 OS=Homo sapiens OX=9606 GN=GEMIN7 PE=1 SV=1	8	1	1	1	131	14.5	7.4	16	105.3	102.5	109.9	93.2	89.3	99.8	105.9	94.1	-	1.1254	0.0345534
P28065	PSMB9	Proteasome subunit beta type-9 OS=Homo sapiens OX=9606 GN=PSMB9 PE=1 SV=2	20	4	8	4	219	23.3	5.03	182	106.7	106.2	104.8	96.9	96	89.4	105.9	94.1	-	1.1254	0.00832432
Q16626	MEA1	Male-enhanced antigen 1 OS=Homo sapiens OX=9606 GN=MEA1 PE=1 SV=2	16	2	3	2	185	19.9	4.22	115	112.3	102.6	102.8	92.9	88.2	101.2	105.9	94.1	-	1.1254	0.0764097
Q9Y4P1	ATG4B	Cysteine protease ATG4B OS=Homo sapiens OX=9606 GN=ATG4B PE=1 SV=2	9	2	2	2	393	44.3	5.07	93	106	104.4	107.3	85.1	95.9	101.4	105.9	94.1333	-	1.125	0.0726941
Q9UHB6	LIMA1	LIM domain and actin-binding protein 1 OS=Homo sapiens OX=9606 GN=LIMA1 PE=1 SV=1	50	35	64	35	759	85.2	6.84	1241	106.9	106.5	104.3	97.7	88.7	96	105.9	94.1333	-	1.125	0.0149681
O60220	TIMM8A	Mitochondrial import inner membrane translocase subunit Tim8 A OS=Homo sapiens OX=9606 GN=TIMM8A PE=1 SV=1	79	5	7	5	97	11	5.16	142	113.2	98.3	106.1	99.9	86.4	96.1	105.867	94.1333	-	1.12465	0.117083
Q9UNY4	TTF2	Transcription termination factor 2 OS=Homo sapiens OX=9606 GN=TTF2 PE=1 SV=2	9	8	9	8	1162	129.5	8.37	229	105	102.7	109.9	94.2	93.6	94.6	105.867	94.1333	-	1.12465	0.00541525
P55212	CASP6	Caspase-6 OS=Homo sapiens OX=9606 GN=CASP6 PE=1 SV=2	23	6	8	6	293	33.3	6.93	249	111.2	102.5	103.8	99.5	89.5	93.4	105.833	94.1333	-	1.12429	0.0422784
P09471	GNAO1	Guanine nucleotide-binding protein G(o) subunit alpha OS=Homo sapiens OX=9606 GN=GNAO1 PE=1 SV=4	31	9	15	7	354	40	5.53	351	106.9	104.2	106.4	95.7	96.4	90.3	105.833	94.1333	-	1.12429	0.00506921
O60669	SLC16A7	Monocarboxylate transporter 2 OS=Homo sapiens OX=9606 GN=SLC16A7 PE=1 SV=2	4	2	2	2	478	52.2	9.31	29	101.8	104.9	110.8	93.1	97.1	92.2	105.833	94.1333	-	1.12429	0.0183035
Q9H074	PAIP1	Polyadenylate-binding protein-interacting protein 1 OS=Homo sapiens OX=9606 GN=PAIP1 PE=1 SV=1	18	8	10	8	479	53.5	4.81	158	102.8	106.2	108.6	91.6	94.7	96.2	105.867	94.1667	-	1.12425	0.00562936
Q9NXS2	QPCTL	Glutaminyl-peptide cyclotransferase-like protein OS=Homo sapiens OX=9606 GN=QPCTL PE=1 SV=2	7	4	4	4	382	42.9	9.82	25	104.5	106.2	106.8	98	93.8	90.7	105.833	94.1667	-	1.12389	0.00632142
Q86VR2	RETREG3	Reticulophagy regulator 3 OS=Homo sapiens OX=9606 GN=RETREG3 PE=1 SV=1	7	2	3	2	466	51.4	4.97	118	113.2	100.8	103.5	92.7	94.5	95.3	105.833	94.1667	-	1.12389	0.0385477
Q9Y2G3	ATP11B	Probable phospholipid-transporting ATPase IF OS=Homo sapiens OX=9606 GN=ATP11B PE=1 SV=2	7	6	6	6	1177	134.1	6.96	114	101.8	106.5	109.2	95.9	93.5	93.1	105.833	94.1667	-	1.12389	0.00747692
Q9NRZ7	AGPAT3	1-acyl-sn-glycerol-3-phosphate acyltransferase gamma OS=Homo sapiens OX=9606 GN=AGPAT3 PE=1 SV=1	9	3	3	3	376	43.4	8.72	41	108.4	105.5	103.5	95	96.3	91.2	105.8	94.1667	-	1.12354	0.00509504
P58335	ANTXR2	Anthrax toxin receptor 2 OS=Homo sapiens OX=9606 GN=ANTXR2 PE=1 SV=5	5	2	2	2	489	53.6	7.46	59	106.2	99.4	111.9	96.1	93.5	93	105.833	94.2	-	1.1235	0.0358161
P61224	RAP1B	Ras-related protein Rap-1b OS=Homo sapiens OX=9606 GN=RAP1B PE=1 SV=1	77	13	29	2	184	20.8	5.78	684	104.7	102.9	109.7	97.7	89.6	95.2	105.767	94.1667	-	1.12319	0.0209837
P00742	F10	Coagulation factor X OS=Homo sapiens OX=9606 GN=F10 PE=1 SV=2	6	2	2	2	488	54.7	5.94	23	103.1	115.4	98.9	94.8	96.6	91.2	105.8	94.2	-	1.12314	0.0894934
O75506	HSBP1	Heat shock factor-binding protein 1 OS=Homo sapiens OX=9606 GN=HSBP1 PE=1 SV=1	34	2	2	2	76	8.5	4.36	91	106.2	104.8	106.4	93.2	92	97.4	105.8	94.2	-	1.12314	0.00247983
Q92667	AKAP1	A-kinase anchor protein 1, mitochondrial OS=Homo sapiens OX=9606 GN=AKAP1 PE=1 SV=1	7	5	5	5	903	97.3	4.94	60	103.7	107.2	106.5	92.4	96	94.2	105.8	94.2	-	1.12314	0.00147212
O15269	SPTLC1	Serine palmitoyltransferase 1 OS=Homo sapiens OX=9606 GN=SPTLC1 PE=1 SV=1	26	11	15	11	473	52.7	6.01	260	111.8	99	106.6	94.5	91.4	96.7	105.8	94.2	-	1.12314	0.0448269
O96011	PEX11B	Peroxisomal membrane protein 11B OS=Homo sapiens OX=9606 GN=PEX11B PE=1 SV=1	25	4	5	4	259	28.4	9.85	108	108	105.6	103.8	93	98.4	91.2	105.8	94.2	-	1.12314	0.0094916
Q9BWM7	SFXN3	Sideroflexin-3 OS=Homo sapiens OX=9606 GN=SFXN3 PE=1 SV=3	33	8	12	6	321	35.5	9.1	288	113.6	98.5	105.3	95.5	91.2	95.9	105.8	94.2	-	1.12314	0.065926
Q08380	LGALS3BP	Galectin-3-binding protein OS=Homo sapiens OX=9606 GN=LGALS3BP PE=1 SV=1	26	12	21	12	585	65.3	5.27	613	111.7	103.7	102	95.5	92.7	94.4	105.8	94.2	-	1.12314	0.0200759
P13473	LAMP2	Lysosome-associated membrane glycoprotein 2 OS=Homo sapiens OX=9606 GN=LAMP2 PE=1 SV=2	5	2	3	2	410	44.9	5.63	101	110.1	100.4	106.8	92.2	91.9	98.5	105.767	94.2	-	1.12279	0.0316479
P83916	CBX1	Chromobox protein homolog 1 OS=Homo sapiens OX=9606 GN=CBX1 PE=1 SV=1	51	8	19	7	185	21.4	4.93	542	104.8	106.3	106.2	94.3	95.2	93.1	105.767	94.2	-	1.12279	0.000118867
Q86X02	CDR2L	Cerebellar degeneration-related protein 2-like OS=Homo sapiens OX=9606 GN=CDR2L PE=1 SV=2	14	5	6	5	465	53	6.01	100	110.7	106.3	100.4	93.3	95.1	94.3	105.8	94.2333	-	1.12274	0.0187988
Q460N5	PARP14	Protein mono-ADP-ribosyltransferase PARP14 OS=Homo sapiens OX=9606 GN=PARP14 PE=1 SV=3	4	4	4	4	1801	202.7	7.18	33	100.3	104.6	112.5	88	93	101.7	105.8	94.2333	-	1.12274	0.097335
P07550	ADRB2	Beta-2 adrenergic receptor OS=Homo sapiens OX=9606 GN=ADRB2 PE=1 SV=3	4	2	2	2	413	46.4	7.03	31	105.3	105.9	106.1	91	98	93.7	105.767	94.2333	-	1.12239	0.00492962
Q6Q759	SPAG17	Sperm-associated antigen 17 OS=Homo sapiens OX=9606 GN=SPAG17 PE=2 SV=1	1	2	2	2	2223	251.6	6.24	0	111.4	100.4	105.5	95.8	89	97.9	105.767	94.2333	-	1.12239	0.0502466
Q01459	CTBS	Di-N-acetylchitobiase OS=Homo sapiens OX=9606 GN=CTBS PE=1 SV=1	4	1	2	1	385	43.7	6.64	67	117.5	101.4	98.4	94	98.4	90.3	105.767	94.2333	-	1.12239	0.144721
O94925	GLS	Glutaminase kidney isoform, mitochondrial OS=Homo sapiens OX=9606 GN=GLS PE=1 SV=1	33	17	24	17	669	73.4	7.77	479	111.8	103.5	102	94.2	87.4	101.1	105.767	94.2333	-	1.12239	0.0820364
O95777	LSM8	U6 snRNA-associated Sm-like protein LSm8 OS=Homo sapiens OX=9606 GN=LSM8 PE=1 SV=3	38	3	6	3	96	10.4	4.48	184	102.7	103.9	110.7	89.9	96.9	95.9	105.767	94.2333	-	1.12239	0.0253464
Q5HYI8	RABL3	Rab-like protein 3 OS=Homo sapiens OX=9606 GN=RABL3 PE=1 SV=1	11	3	3	3	236	26.4	7.11	35	118.2	100.6	98.5	94.3	92.5	95.9	105.767	94.2333	-	1.12239	0.142205
Q12907	LMAN2	Vesicular integral-membrane protein VIP36 OS=Homo sapiens OX=9606 GN=LMAN2 PE=1 SV=1	26	7	9	7	356	40.2	6.95	101	115.8	99.9	101.6	95.3	94.8	92.6	105.767	94.2333	-	1.12239	0.0868986
Q5T160	RARS2	Probable arginine--tRNA ligase, mitochondrial OS=Homo sapiens OX=9606 GN=RARS2 PE=1 SV=1	7	3	3	3	578	65.5	8.21	67	105	100.6	111.7	96.9	87.8	98	105.767	94.2333	-	1.12239	0.0650044
P19474	TRIM21	E3 ubiquitin-protein ligase TRIM21 OS=Homo sapiens OX=9606 GN=TRIM21 PE=1 SV=1	9	4	4	4	475	54.1	6.38	82	105.3	103.8	108.1	94.7	96	92	105.733	94.2333	-	1.12204	0.00263031
P55145	MANF	Mesencephalic astrocyte-derived neurotrophic factor OS=Homo sapiens OX=9606 GN=MANF PE=1 SV=3	48	12	27	12	182	20.7	8.69	394	105.3	108.5	103.4	90.9	94.8	97.1	105.733	94.2667	-	1.12164	0.00807673
O75843	AP1G2	AP-1 complex subunit gamma-like 2 OS=Homo sapiens OX=9606 GN=AP1G2 PE=1 SV=1	12	7	7	6	785	87.1	6.55	107	111.6	101.2	104.4	98.3	89.6	94.9	105.733	94.2667	-	1.12164	0.0450681
P19823	ITIH2	Inter-alpha-trypsin inhibitor heavy chain H2 OS=Homo sapiens OX=9606 GN=ITIH2 PE=1 SV=2	4	4	4	4	946	106.4	6.86	104	93.4	124.5	99.3	94.1	100.8	87.9	105.733	94.2667	-	1.12164	0.325425
P04844	RPN2	Dolichyl-diphosphooligosaccharide--protein glycosyltransferase subunit 2 OS=Homo sapiens OX=9606 GN=RPN2 PE=1 SV=3	45	19	40	19	631	69.2	5.69	1509	109.7	103.9	103.6	94.7	94.2	93.9	105.733	94.2667	-	1.12164	0.0045743
Q9UBV2	SEL1L	Protein sel-1 homolog 1 OS=Homo sapiens OX=9606 GN=SEL1L PE=1 SV=3	14	7	7	7	794	88.7	5.39	149	114.3	104	98.9	94.8	90.2	97.8	105.733	94.2667	-	1.12164	0.0852318
P13716	ALAD	Delta-aminolevulinic acid dehydratase OS=Homo sapiens OX=9606 GN=ALAD PE=1 SV=1	7	2	3	2	330	36.3	6.79	63	106.8	103.9	106.5	88.9	100	93.9	105.733	94.2667	-	1.12164	0.0264345
P33527	ABCC1	Multidrug resistance-associated protein 1 OS=Homo sapiens OX=9606 GN=ABCC1 PE=1 SV=3	11	14	14	14	1531	171.5	7.11	313	104.9	106.8	105.4	93.9	93.8	95.1	105.7	94.2667	-	1.12129	8.4837e-05
Q03001	DST	Dystonin OS=Homo sapiens OX=9606 GN=DST PE=1 SV=4	13	83	96	75	7570	860.1	5.25	1673	107	104.5	105.7	93.4	93.8	95.7	105.733	94.3	-	1.12124	0.00035001
P01024	C3	Complement C3 OS=Homo sapiens OX=9606 GN=C3 PE=1 SV=2	24	30	33	29	1663	187	6.4	641	107.1	107	103	91	100.6	91.3	105.7	94.3	-	1.12089	0.0292349
Q96T83	SLC9A7	Sodium/hydrogen exchanger 7 OS=Homo sapiens OX=9606 GN=SLC9A7 PE=1 SV=1	3	2	2	2	725	80.1	6.42	36	103.2	99.5	114.4	96.2	94.4	92.3	105.7	94.3	-	1.12089	0.0690822
Q99808	SLC29A1	Equilibrative nucleoside transporter 1 OS=Homo sapiens OX=9606 GN=SLC29A1 PE=1 SV=3	2	1	1	1	456	50.2	8.29	54	100.5	112.2	104.3	92.8	92.7	97.4	105.667	94.3	-	1.12054	0.0396216
Q53S08	RAB6D	Ras-related protein Rab-6D OS=Homo sapiens OX=9606 GN=RAB6D PE=2 SV=1	15	3	6	1	254	28.2	6.74	120	104.9	106	106.1	95.6	90.8	96.5	105.667	94.3	-	1.12054	0.00328607
P23610	F8A1	40-kDa huntingtin-associated protein OS=Homo sapiens OX=9606 GN=F8A1 PE=1 SV=2	3	1	1	1	371	39.1	6.84	23	102.2	105.1	109.8	97.9	91.4	93.7	105.7	94.3333	-	1.12049	0.0176436
O75396	SEC22B	Vesicle-trafficking protein SEC22b OS=Homo sapiens OX=9606 GN=SEC22B PE=1 SV=4	47	9	17	9	215	24.6	6.92	389	107	105.9	104.2	92.8	95.7	94.5	105.7	94.3333	-	1.12049	0.000630444
P17612	PRKACA	cAMP-dependent protein kinase catalytic subunit alpha OS=Homo sapiens OX=9606 GN=PRKACA PE=1 SV=2	36	10	13	3	351	40.6	8.79	224	105	105.2	106.9	89.9	98.5	94.6	105.7	94.3333	-	1.12049	0.0113059
P45974	USP5	Ubiquitin carboxyl-terminal hydrolase 5 OS=Homo sapiens OX=9606 GN=USP5 PE=1 SV=2	38	25	37	24	858	95.7	5.03	812	112.7	100.8	103.5	98.5	90.1	94.4	105.667	94.3333	-	1.12014	0.0594209
P18827	SDC1	Syndecan-1 OS=Homo sapiens OX=9606 GN=SDC1 PE=1 SV=3	12	2	2	2	310	32.4	4.63	36	115.4	102.3	99.3	88.7	96.4	97.9	105.667	94.3333	-	1.12014	0.117948
O15194	CTDSPL	CTD small phosphatase-like protein OS=Homo sapiens OX=9606 GN=CTDSPL PE=1 SV=2	9	2	2	2	276	31.1	5.54	88	108.9	103.6	104.5	100.6	87.7	94.7	105.667	94.3333	-	1.12014	0.0496584
P51572	BCAP31	B-cell receptor-associated protein 31 OS=Homo sapiens OX=9606 GN=BCAP31 PE=1 SV=3	52	20	30	20	246	28	8.44	355	106.7	107.5	102.8	95.1	94.5	93.4	105.667	94.3333	-	1.12014	0.00179305
P38117	ETFB	Electron transfer flavoprotein subunit beta OS=Homo sapiens OX=9606 GN=ETFB PE=1 SV=3	49	11	16	11	255	27.8	8.1	294	106.9	105.2	104.9	95.7	96.6	90.7	105.667	94.3333	-	1.12014	0.00426407
Q68CZ6	HAUS3	HAUS augmin-like complex subunit 3 OS=Homo sapiens OX=9606 GN=HAUS3 PE=1 SV=1	16	7	8	7	603	69.6	5.55	105	110	99.9	107.1	97.1	90.3	95.6	105.667	94.3333	-	1.12014	0.0358272
O95858	TSPAN15	Tetraspanin-15 OS=Homo sapiens OX=9606 GN=TSPAN15 PE=1 SV=1	8	2	2	2	294	33.1	5.48	45	106.6	103.4	107	94.9	97	91.1	105.667	94.3333	-	1.12014	0.00540258
P21964	COMT	Catechol O-methyltransferase OS=Homo sapiens OX=9606 GN=COMT PE=1 SV=2	63	13	21	13	271	30	5.47	400	108.1	105.5	103.3	95.9	93.9	93.2	105.633	94.3333	-	1.11979	0.0021497
Q5VTE6	ANGEL2	Protein angel homolog 2 OS=Homo sapiens OX=9606 GN=ANGEL2 PE=2 SV=1	6	2	2	2	544	62.3	7.81	46	110.3	108.2	98.4	92.5	97.5	93	105.633	94.3333	-	1.11979	0.0474816
P08572	COL4A2	Collagen alpha-2(IV) chain OS=Homo sapiens OX=9606 GN=COL4A2 PE=1 SV=4	3	4	4	4	1712	167.4	8.66	117	104.9	98.3	113.7	95.5	95.6	91.9	105.633	94.3333	-	1.11979	0.0709086
Q8IXM3	MRPL41	39S ribosomal protein L41, mitochondrial OS=Homo sapiens OX=9606 GN=MRPL41 PE=1 SV=1	28	4	5	4	137	15.4	9.57	99	107.5	106.5	102.9	92.6	93.8	96.6	105.633	94.3333	-	1.11979	0.00350646
Q9UMS0	NFU1	NFU1 iron-sulfur cluster scaffold homolog, mitochondrial OS=Homo sapiens OX=9606 GN=NFU1 PE=1 SV=2	10	2	4	2	254	28.4	5.07	137	111.2	104.3	101.5	93.8	93.1	96.2	105.667	94.3667	-	1.11975	0.0203367
Q13555	CAMK2G	Calcium/calmodulin-dependent protein kinase type II subunit gamma OS=Homo sapiens OX=9606 GN=CAMK2G PE=1 SV=4	28	12	16	9	558	62.6	7.83	354	106.1	106.2	104.7	93.2	97.2	92.7	105.667	94.3667	-	1.11975	0.00167988
Q9NWB7	IFT57	Intraflagellar transport protein 57 homolog OS=Homo sapiens OX=9606 GN=IFT57 PE=1 SV=1	3	1	1	1	429	49.1	4.98	49	104.4	97.2	115.3	99.9	86.4	96.8	105.633	94.3667	-	1.11939	0.165938
Q8NEW0	SLC30A7	Zinc transporter 7 OS=Homo sapiens OX=9606 GN=SLC30A7 PE=2 SV=1	10	3	4	3	376	41.6	6.95	112	107.2	104.8	104.8	96.5	92.3	94.3	105.6	94.3667	-	1.11904	0.00150726
Q8N8R5	C2orf69	UPF0565 protein C2orf69 OS=Homo sapiens OX=9606 GN=C2orf69 PE=1 SV=1	9	3	5	3	385	43.4	8.09	134	107.7	106.9	102.2	97.7	92	93.4	105.6	94.3667	-	1.11904	0.00980134
P83111	LACTB	Serine beta-lactamase-like protein LACTB, mitochondrial OS=Homo sapiens OX=9606 GN=LACTB PE=1 SV=2	18	7	10	7	547	60.7	8.53	132	110.1	104.5	102.2	95.5	93.6	94	105.6	94.3667	-	1.11904	0.00966672
P06753	TPM3	Tropomyosin alpha-3 chain OS=Homo sapiens OX=9606 GN=TPM3 PE=1 SV=2	44	20	39	7	285	32.9	4.72	399	107.2	107.4	102.3	93.6	96	93.6	105.633	94.4	-	1.119	0.00371336
Q12965	MYO1E	Unconventional myosin-Ie OS=Homo sapiens OX=9606 GN=MYO1E PE=1 SV=2	25	23	29	22	1108	127	8.92	604	107.4	104.8	104.7	94.4	94.6	94.2	105.633	94.4	-	1.119	0.000228156
Q13557	CAMK2D	Calcium/calmodulin-dependent protein kinase type II subunit delta OS=Homo sapiens OX=9606 GN=CAMK2D PE=1 SV=3	28	11	14	8	499	56.3	7.25	327	109.1	106.5	101.3	94.3	98.5	90.4	105.633	94.4	-	1.119	0.0265434
A0A0B4J2D5	GATD3B	Glutamine amidotransferase-like class 1 domain-containing protein 3B, mitochondrial OS=Homo sapiens OX=9606 GN=GATD3B PE=1 SV=1	13	3	4	3	268	28.1	8.27	141	108.6	101.2	107	92.9	97.1	93.2	105.6	94.4	-	1.11864	0.0129612
P52306	RAP1GDS1	Rap1 GTPase-GDP dissociation stimulator 1 OS=Homo sapiens OX=9606 GN=RAP1GDS1 PE=1 SV=3	45	21	26	20	607	66.3	5.31	573	105.8	105.7	105.3	94	97.2	92	105.6	94.4	-	1.11864	0.00181694
Q9GZP8	IMUP	Immortalization up-regulated protein OS=Homo sapiens OX=9606 GN=IMUP PE=1 SV=1	49	4	7	4	106	10.9	9.73	125	108.2	108.4	100.2	93.3	95.7	94.2	105.6	94.4	-	1.11864	0.0159365
O43772	SLC25A20	Mitochondrial carnitine/acylcarnitine carrier protein OS=Homo sapiens OX=9606 GN=SLC25A20 PE=1 SV=1	26	8	8	8	301	32.9	9.41	85	105	104.3	107.5	92.1	95.9	95.2	105.6	94.4	-	1.11864	0.00180218
Q15435	PPP1R7	Protein phosphatase 1 regulatory subunit 7 OS=Homo sapiens OX=9606 GN=PPP1R7 PE=1 SV=1	46	13	21	13	360	41.5	4.91	621	107.7	104.7	104.4	94	95.8	93.4	105.6	94.4	-	1.11864	0.000930976
Q8WUH1	CHURC1	Protein Churchill OS=Homo sapiens OX=9606 GN=CHURC1 PE=1 SV=2	22	2	3	2	139	16.1	5.54	40	111.4	101.6	103.8	102.6	85.5	95.2	105.6	94.4333	-	1.11825	0.125197
Q92896	GLG1	Golgi apparatus protein 1 OS=Homo sapiens OX=9606 GN=GLG1 PE=1 SV=2	23	25	29	24	1179	134.5	6.9	457	114.2	100.8	101.7	95.1	96.6	91.6	105.567	94.4333	-	1.1179	0.0715505
Q9Y277	VDAC3	Voltage-dependent anion-selective channel protein 3 OS=Homo sapiens OX=9606 GN=VDAC3 PE=1 SV=1	55	13	32	12	283	30.6	8.66	679	107.1	107.2	102.4	94.4	96.9	92	105.567	94.4333	-	1.1179	0.00632675
P11217	PYGM	Glycogen phosphorylase, muscle form OS=Homo sapiens OX=9606 GN=PYGM PE=1 SV=6	12	8	15	1	842	97	7.03	306	96.8	113	106.9	88.4	99.4	95.5	105.567	94.4333	-	1.1179	0.123316
O43847	NRDC	Nardilysin OS=Homo sapiens OX=9606 GN=NRDC PE=1 SV=3	17	19	27	19	1151	131.6	4.98	582	111.4	102.9	102.4	91.7	92.6	99	105.567	94.4333	-	1.1179	0.0400988
Q96GJ1	TRMT2B	tRNA (uracil(54)-C(5))-methyltransferase homolog OS=Homo sapiens OX=9606 GN=TRMT2B PE=1 SV=1	3	1	1	1	504	56.4	8.81	52	147	65.6	104.1	73.5	113.1	96.7	105.567	94.4333	-	1.1179	0.692375
O95202	LETM1	Mitochondrial proton/calcium exchanger protein OS=Homo sapiens OX=9606 GN=LETM1 PE=1 SV=1	34	21	33	21	739	83.3	6.7	808	104.8	106.4	105.4	96.4	94.7	92.2	105.533	94.4333	-	1.11754	0.00105084
P08582	MELTF	Melanotransferrin OS=Homo sapiens OX=9606 GN=MELTF PE=1 SV=2	21	11	16	11	738	80.2	5.94	329	109	101.3	106.3	99.4	94	89.9	105.533	94.4333	-	1.11754	0.0355198
Q9UL42	PNMA2	Paraneoplastic antigen Ma2 OS=Homo sapiens OX=9606 GN=PNMA2 PE=1 SV=2	8	3	3	3	364	41.5	4.86	99	107	100.2	109.5	103.5	87.3	92.6	105.567	94.4667	-	1.1175	0.11465
Q9Y4P8	WIPI2	WD repeat domain phosphoinositide-interacting protein 2 OS=Homo sapiens OX=9606 GN=WIPI2 PE=1 SV=1	21	7	7	6	454	49.4	6.46	157	105.9	103.8	106.9	93.1	96.9	93.4	105.533	94.4667	-	1.11715	0.00190939
Q15477	SKIV2L	Helicase SKI2W OS=Homo sapiens OX=9606 GN=SKIV2L PE=1 SV=3	9	8	8	8	1246	137.7	6.06	118	108.3	103	105.3	92.8	96.4	94.2	105.533	94.4667	-	1.11715	0.00398821
O15173	PGRMC2	Membrane-associated progesterone receptor component 2 OS=Homo sapiens OX=9606 GN=PGRMC2 PE=1 SV=1	23	6	10	5	223	23.8	4.88	240	108.2	105.4	103	95.2	98.6	89.6	105.533	94.4667	-	1.11715	0.0215787
P10620	MGST1	Microsomal glutathione S-transferase 1 OS=Homo sapiens OX=9606 GN=MGST1 PE=1 SV=1	27	4	10	4	155	17.6	9.39	294	106.8	105.6	104.2	93.8	97.3	92.3	105.533	94.4667	-	1.11715	0.00263628
Q9Y2D4	EXOC6B	Exocyst complex component 6B OS=Homo sapiens OX=9606 GN=EXOC6B PE=1 SV=3	6	4	5	3	811	94.1	6.46	90	110.3	101.1	105.1	94.5	95.5	93.4	105.5	94.4667	-	1.1168	0.0156132
Q9Y291	MRPS33	28S ribosomal protein S33, mitochondrial OS=Homo sapiens OX=9606 GN=MRPS33 PE=1 SV=1	17	2	3	2	106	12.6	10.11	48	107.9	102.2	106.4	98.3	86.8	98.3	105.5	94.4667	-	1.1168	0.0582084
Q8IVG5	SAMD9L	Sterile alpha motif domain-containing protein 9-like OS=Homo sapiens OX=9606 GN=SAMD9L PE=1 SV=2	1	1	1	1	1584	184.4	8.02	28	94.9	88.6	133.1	90.3	86	107.2	105.533	94.5	-	1.11675	0.511626
P11717	IGF2R	Cation-independent mannose-6-phosphate receptor OS=Homo sapiens OX=9606 GN=IGF2R PE=1 SV=3	17	35	37	35	2491	274.2	5.94	652	112.8	101	102.8	96.7	91.7	95.1	105.533	94.5	-	1.11675	0.0493371
P29966	MARCKS	Myristoylated alanine-rich C-kinase substrate OS=Homo sapiens OX=9606 GN=MARCKS PE=1 SV=4	50	11	24	11	332	31.5	4.45	789	107.5	107.3	101.8	96	96	91.5	105.533	94.5	-	1.11675	0.00998479
Q9HA77	CARS2	Probable cysteine--tRNA ligase, mitochondrial OS=Homo sapiens OX=9606 GN=CARS2 PE=1 SV=1	16	7	8	7	564	62.2	8.34	150	104.8	104.1	107.6	94.5	95	94	105.5	94.5	-	1.1164	0.000577082
P20933	AGA	N(4)-(beta-N-acetylglucosaminyl)-L-asparaginase OS=Homo sapiens OX=9606 GN=AGA PE=1 SV=2	3	1	1	1	346	37.2	6.28	0	107.7	104.2	104.6	93.9	92	97.6	105.5	94.5	-	1.1164	0.00515303
Q53FA7	TP53I3	Quinone oxidoreductase PIG3 OS=Homo sapiens OX=9606 GN=TP53I3 PE=1 SV=2	2	1	1	1	332	35.5	7.17	45	94	108.6	113.9	84.2	102.9	96.4	105.5	94.5	-	1.1164	0.245516
Q6QNY1	BLOC1S2	Biogenesis of lysosome-related organelles complex 1 subunit 2 OS=Homo sapiens OX=9606 GN=BLOC1S2 PE=1 SV=1	21	1	1	1	142	16	4.86	0	108.8	92.5	115.2	100.4	95.2	87.9	105.5	94.5	-	1.1164	0.224763
Q9C004	SPRY4	Protein sprouty homolog 4 OS=Homo sapiens OX=9606 GN=SPRY4 PE=1 SV=2	25	5	5	5	299	32.5	7.88	105	106.4	105.7	104.3	98.6	91.3	93.6	105.467	94.5	-	1.11605	0.0080875
Q8N5I2	ARRDC1	Arrestin domain-containing protein 1 OS=Homo sapiens OX=9606 GN=ARRDC1 PE=1 SV=1	6	2	2	2	433	46	7.02	35	104.8	100.6	111	92.1	95.5	95.9	105.467	94.5	-	1.11605	0.0279939
O00213	APBB1	Amyloid-beta A4 precursor protein-binding family B member 1 OS=Homo sapiens OX=9606 GN=APBB1 PE=1 SV=2	2	1	1	1	710	77.2	5.06	0	116.3	98	102.1	98.7	87.2	97.6	105.467	94.5	-	1.11605	0.174245
P02787	TF	Serotransferrin OS=Homo sapiens OX=9606 GN=TF PE=1 SV=3	1	1	1	1	698	77	7.12	23	90.8	136.9	88.7	92.8	96.7	94	105.467	94.5	-	1.11605	0.525096
Q92625	ANKS1A	Ankyrin repeat and SAM domain-containing protein 1A OS=Homo sapiens OX=9606 GN=ANKS1A PE=1 SV=4	7	6	6	6	1134	123	6.38	40	115.5	92.6	108.3	98	90.9	94.6	105.467	94.5	-	1.11605	0.195543
Q6T4R5	NHS	Nance-Horan syndrome protein OS=Homo sapiens OX=9606 GN=NHS PE=1 SV=2	1	1	1	1	1651	179	6.86	0	105.6	104.7	106.2	93.4	93.3	96.9	105.5	94.5333	-	1.11601	0.000963582
P82921	MRPS21	28S ribosomal protein S21, mitochondrial OS=Homo sapiens OX=9606 GN=MRPS21 PE=1 SV=3	39	3	3	3	87	10.7	9.92	64	106	103.9	106.6	97	94	92.6	105.5	94.5333	-	1.11601	0.00202756
Q63ZY3	KANK2	KN motif and ankyrin repeat domain-containing protein 2 OS=Homo sapiens OX=9606 GN=KANK2 PE=1 SV=1	10	8	10	8	851	91.1	5.63	200	106	104.9	105.5	93.8	95.1	94.7	105.467	94.5333	-	1.11566	2.56536e-05
O43688	PLPP2	Phospholipid phosphatase 2 OS=Homo sapiens OX=9606 GN=PLPP2 PE=1 SV=1	7	2	2	2	288	32.6	8.35	40	109.6	99.8	107	95.3	90.7	97.6	105.467	94.5333	-	1.11566	0.0373914
A3KMH1	VWA8	von Willebrand factor A domain-containing protein 8 OS=Homo sapiens OX=9606 GN=VWA8 PE=1 SV=2	4	5	5	5	1905	214.7	7.4	64	108.5	96.2	111.7	95.2	85.6	102.8	105.467	94.5333	-	1.11566	0.186305
P0CAP1	MYZAP	Myocardial zonula adherens protein OS=Homo sapiens OX=9606 GN=MYZAP PE=1 SV=1	2	1	1	1	466	54.2	6.18	13	111.6	102.2	102.6	90.8	96.4	96.4	105.467	94.5333	-	1.11566	0.0382585
Q9BXF6	RAB11FIP5	Rab11 family-interacting protein 5 OS=Homo sapiens OX=9606 GN=RAB11FIP5 PE=1 SV=1	33	15	20	15	653	70.4	9.23	538	107.6	105.5	103.3	94.6	95.5	93.5	105.467	94.5333	-	1.11566	0.0013344
Q14624	ITIH4	Inter-alpha-trypsin inhibitor heavy chain H4 OS=Homo sapiens OX=9606 GN=ITIH4 PE=1 SV=4	2	2	2	2	930	103.3	6.98	0	96.4	122.9	97	95.3	96.5	91.8	105.433	94.5333	-	1.1153	0.285452
Q9NUJ3	TCP11L1	T-complex protein 11-like protein 1 OS=Homo sapiens OX=9606 GN=TCP11L1 PE=1 SV=1	8	3	3	3	509	57	5.59	103	104.5	104.1	107.7	98.3	96.1	89.3	105.433	94.5667	-	1.11491	0.0208744
Q969T9	WBP2	WW domain-binding protein 2 OS=Homo sapiens OX=9606 GN=WBP2 PE=1 SV=1	16	4	6	4	261	28.1	5.91	158	109.4	105.6	101.3	91.7	93.8	98.2	105.433	94.5667	-	1.11491	0.0228814
Q92574	TSC1	Hamartin OS=Homo sapiens OX=9606 GN=TSC1 PE=1 SV=2	4	3	3	3	1164	129.7	6.47	76	112	98.4	105.9	93	92.5	98.2	105.433	94.5667	-	1.11491	0.0662727
Q8N6L1	KRTCAP2	Keratinocyte-associated protein 2 OS=Homo sapiens OX=9606 GN=KRTCAP2 PE=1 SV=2	13	1	3	1	136	14.7	9.61	145	106.6	105.8	103.9	94.8	92.1	96.8	105.433	94.5667	-	1.11491	0.00234025
P36915	GNL1	Guanine nucleotide-binding protein-like 1 OS=Homo sapiens OX=9606 GN=GNL1 PE=1 SV=2	22	11	14	11	607	68.6	5.8	216	107.9	103.3	105	94.2	94.1	95.4	105.4	94.5667	-	1.11456	0.00152819
Q15746	MYLK	Myosin light chain kinase, smooth muscle OS=Homo sapiens OX=9606 GN=MYLK PE=1 SV=4	5	9	12	8	1914	210.6	6.15	98	105.7	106.4	104.2	94.7	95.6	93.5	105.433	94.6	-	1.11452	0.000260801
Q7L2J0	MEPCE	7SK snRNA methylphosphate capping enzyme OS=Homo sapiens OX=9606 GN=MEPCE PE=1 SV=1	2	2	2	2	689	74.3	9.57	21	88.4	84.5	143.4	92.7	97.2	93.9	105.433	94.6	-	1.11452	0.600244
Q96NY7	CLIC6	Chloride intracellular channel protein 6 OS=Homo sapiens OX=9606 GN=CLIC6 PE=2 SV=3	9	5	6	5	704	73	4.37	108	105.5	106.8	104	93.3	96.2	94.3	105.433	94.6	-	1.11452	0.000765973
O94992	HEXIM1	Protein HEXIM1 OS=Homo sapiens OX=9606 GN=HEXIM1 PE=1 SV=1	20	5	6	5	359	40.6	4.89	154	103.1	106.1	107.1	93.2	95.7	94.9	105.433	94.6	-	1.11452	0.00154285
Q4G0F5	VPS26B	Vacuolar protein sorting-associated protein 26B OS=Homo sapiens OX=9606 GN=VPS26B PE=1 SV=2	17	6	6	5	336	39.1	7.36	57	108.5	102.8	104.9	92.2	93.1	98.5	105.4	94.6	-	1.11416	0.013793
O75356	ENTPD5	Ectonucleoside triphosphate diphosphohydrolase 5 OS=Homo sapiens OX=9606 GN=ENTPD5 PE=1 SV=1	6	2	2	2	428	47.5	6.33	54	104.7	101.8	109.7	96.1	97.3	90.4	105.4	94.6	-	1.11416	0.0262797
Q9UIC8	LCMT1	Leucine carboxyl methyltransferase 1 OS=Homo sapiens OX=9606 GN=LCMT1 PE=1 SV=2	10	3	3	3	334	38.4	6.04	67	104.3	107.8	104.1	94	94.7	95.1	105.4	94.6	-	1.11416	0.000967834
Q96EC8	YIPF6	Protein YIPF6 OS=Homo sapiens OX=9606 GN=YIPF6 PE=1 SV=2	8	2	3	2	236	26.2	5.64	60	109.7	106.4	100.1	90	99.6	94.2	105.4	94.6	-	1.11416	0.0524416
Q14247	CTTN	Src substrate cortactin OS=Homo sapiens OX=9606 GN=CTTN PE=1 SV=2	45	24	48	24	550	61.5	5.4	891	109.8	105.4	101	93.6	95.5	94.7	105.4	94.6	-	1.11416	0.0142041
Q5QJ74	TBCEL	Tubulin-specific chaperone cofactor E-like protein OS=Homo sapiens OX=9606 GN=TBCEL PE=1 SV=2	12	4	4	4	424	48.2	5.38	74	102	102.4	111.8	100.9	92	90.9	105.4	94.6	-	1.11416	0.0744838
P43378	PTPN9	Tyrosine-protein phosphatase non-receptor type 9 OS=Homo sapiens OX=9606 GN=PTPN9 PE=1 SV=1	16	8	9	8	593	68	8.02	119	98.9	101.5	115.8	95	93	95.8	105.4	94.6	-	1.11416	0.112177
Q14318	FKBP8	Peptidyl-prolyl cis-trans isomerase FKBP8 OS=Homo sapiens OX=9606 GN=FKBP8 PE=1 SV=2	25	8	18	8	412	44.5	4.84	414	111.2	102.8	102.1	94.8	94.1	94.9	105.367	94.6	-	1.11381	0.0214093
P07902	GALT	Galactose-1-phosphate uridylyltransferase OS=Homo sapiens OX=9606 GN=GALT PE=1 SV=3	3	1	1	1	379	43.3	6.99	23	96.9	87.8	131.5	95.5	94.4	94	105.4	94.6333	-	1.11377	0.464222
Q9UKG9	CROT	Peroxisomal carnitine O-octanoyltransferase OS=Homo sapiens OX=9606 GN=CROT PE=1 SV=2	7	3	3	3	612	70.1	7.08	93	107.9	102.3	106	95.9	94.3	93.7	105.4	94.6333	-	1.11377	0.00369532
Q96PD2	DCBLD2	Discoidin, CUB and LCCL domain-containing protein 2 OS=Homo sapiens OX=9606 GN=DCBLD2 PE=1 SV=1	1	1	1	1	775	85	7.17	47	114.3	97.8	104	98.8	96.5	88.6	105.367	94.6333	-	1.11342	0.133727
P50452	SERPINB8	Serpin B8 OS=Homo sapiens OX=9606 GN=SERPINB8 PE=1 SV=2	52	19	23	17	374	42.7	5.57	447	104.6	105.9	105.6	95.5	93.2	95.2	105.367	94.6333	-	1.11342	0.000198493
Q8NI22	MCFD2	Multiple coagulation factor deficiency protein 2 OS=Homo sapiens OX=9606 GN=MCFD2 PE=1 SV=1	12	1	2	1	146	16.4	4.63	50	124.1	99.6	92.4	95.2	93.1	95.6	105.367	94.6333	-	1.11342	0.327296
O94929	ABLIM3	Actin-binding LIM protein 3 OS=Homo sapiens OX=9606 GN=ABLIM3 PE=1 SV=3	9	5	6	5	683	77.8	8.54	122	109.2	103.4	103.5	100.9	92.8	90.2	105.367	94.6333	-	1.11342	0.0457939
Q96G28	CFAP36	Cilia- and flagella-associated protein 36 OS=Homo sapiens OX=9606 GN=CFAP36 PE=1 SV=2	6	2	3	2	342	39.4	4.97	55	107.7	105.2	103.1	95.5	95.8	92.6	105.333	94.6333	-	1.11307	0.00308882
P36639	NUDT1	7,8-dihydro-8-oxoguanine triphosphatase OS=Homo sapiens OX=9606 GN=NUDT1 PE=1 SV=3	15	2	2	2	197	22.5	5.27	53	101.4	99.9	114.7	98.4	96.1	89.4	105.333	94.6333	-	1.11307	0.119747
Q6UWJ1	TMCO3	Transmembrane and coiled-coil domain-containing protein 3 OS=Homo sapiens OX=9606 GN=TMCO3 PE=1 SV=1	4	3	3	3	677	75.5	6.9	27	106.3	102.7	107	96.1	93.2	94.6	105.333	94.6333	-	1.11307	0.00244239
O60674	JAK2	Tyrosine-protein kinase JAK2 OS=Homo sapiens OX=9606 GN=JAK2 PE=1 SV=2	1	1	1	1	1132	130.6	7.21	15	113.6	110.4	92	105.6	84.4	93.9	105.333	94.6333	-	1.11307	0.305062
Q86VI3	IQGAP3	Ras GTPase-activating-like protein IQGAP3 OS=Homo sapiens OX=9606 GN=IQGAP3 PE=1 SV=2	26	34	42	32	1631	184.6	7.65	912	108.3	103	104.7	95.4	92.4	96.1	105.333	94.6333	-	1.11307	0.00518687
O75884	RBBP9	Serine hydrolase RBBP9 OS=Homo sapiens OX=9606 GN=RBBP9 PE=1 SV=2	37	4	4	4	186	21	6.2	77	106.3	106.2	103.5	95.2	96.9	91.8	105.333	94.6333	-	1.11307	0.00368029
O95749	GGPS1	Geranylgeranyl pyrophosphate synthase OS=Homo sapiens OX=9606 GN=GGPS1 PE=1 SV=1	7	2	2	2	300	34.8	6.14	32	107.6	106	102.5	96.3	93.1	94.6	105.367	94.6667	-	1.11303	0.00375354
P49441	INPP1	Inositol polyphosphate 1-phosphatase OS=Homo sapiens OX=9606 GN=INPP1 PE=1 SV=1	19	5	8	5	399	44	5.26	233	106.1	106.4	103.6	95.8	94.1	94.1	105.367	94.6667	-	1.11303	0.000528272
Q8IW35	CEP97	Centrosomal protein of 97 kDa OS=Homo sapiens OX=9606 GN=CEP97 PE=1 SV=1	12	8	9	8	865	96.9	5.02	169	107.1	102.5	106.5	95.6	96	92.4	105.367	94.6667	-	1.11303	0.00434498
Q9Y4K1	CRYBG1	Beta/gamma crystallin domain-containing protein 1 OS=Homo sapiens OX=9606 GN=CRYBG1 PE=1 SV=3	7	8	9	8	1723	188.6	5.86	170	104.9	104.2	107	95.9	94.9	93.2	105.367	94.6667	-	1.11303	0.000749399
Q6GQQ9	OTUD7B	OTU domain-containing protein 7B OS=Homo sapiens OX=9606 GN=OTUD7B PE=1 SV=1	6	4	5	4	843	92.5	6.71	168	105.6	101.8	108.7	91.5	95.1	97.4	105.367	94.6667	-	1.11303	0.0152867
Q9H871	RMND5A	E3 ubiquitin-protein transferase RMND5A OS=Homo sapiens OX=9606 GN=RMND5A PE=1 SV=1	6	2	2	2	391	44	6.06	94	109.9	99.9	106.1	88.1	94.9	100.9	105.3	94.6333	-	1.11272	0.086137
Q9ULQ0	STRIP2	Striatin-interacting protein 2 OS=Homo sapiens OX=9606 GN=STRIP2 PE=1 SV=2	4	3	3	2	834	95.3	5.91	36	104.2	97.4	114.4	101.8	87.3	94.9	105.333	94.6667	-	1.11268	0.174883
Q8IYQ7	THNSL1	Threonine synthase-like 1 OS=Homo sapiens OX=9606 GN=THNSL1 PE=1 SV=2	10	5	5	5	743	83	7.12	112	98.6	94.7	122.6	96.7	97.1	90.2	105.3	94.6667	-	1.11232	0.303092
Q9UKU7	ACAD8	Isobutyryl-CoA dehydrogenase, mitochondrial OS=Homo sapiens OX=9606 GN=ACAD8 PE=1 SV=1	35	10	12	10	415	45	7.85	262	108.1	104.9	102.9	96.4	94.7	92.9	105.3	94.6667	-	1.11232	0.00428405
Q8TF74	WIPF2	WAS/WASL-interacting protein family member 2 OS=Homo sapiens OX=9606 GN=WIPF2 PE=1 SV=1	4	2	2	2	440	46.3	10.93	0	102.4	107.2	106.3	91.2	94.1	98.7	105.3	94.6667	-	1.11232	0.0156427
Q53H96	PYCR3	Pyrroline-5-carboxylate reductase 3 OS=Homo sapiens OX=9606 GN=PYCR3 PE=1 SV=3	15	3	3	3	274	28.6	7.72	22	86.1	93.8	136.1	94	96.3	93.8	105.333	94.7	-	1.11228	0.531995
O95476	CTDNEP1	CTD nuclear envelope phosphatase 1 OS=Homo sapiens OX=9606 GN=CTDNEP1 PE=1 SV=2	4	1	1	1	244	28.4	9.76	22	103.2	101.4	111.3	88.5	96.5	99.1	105.3	94.7	-	1.11193	0.0740407
Q8NHZ8	CDC26	Anaphase-promoting complex subunit CDC26 OS=Homo sapiens OX=9606 GN=CDC26 PE=1 SV=1	25	2	2	2	85	9.8	6.81	70	107.5	101.9	106.5	92	90.3	101.8	105.3	94.7	-	1.11193	0.056079
Q969Q6	PPP2R3C	Serine/threonine-protein phosphatase 2A regulatory subunit B'' subunit gamma OS=Homo sapiens OX=9606 GN=PPP2R3C PE=1 SV=1	2	1	1	1	453	53.3	5.19	0	112.5	102	101.4	97.5	92.6	94	105.3	94.7	-	1.11193	0.0526257
Q7Z6L1	TECPR1	Tectonin beta-propeller repeat-containing protein 1 OS=Homo sapiens OX=9606 GN=TECPR1 PE=1 SV=1	3	3	3	3	1165	129.6	6.24	42	106.4	105.7	103.7	99.9	93.8	90.4	105.267	94.7	-	1.11158	0.0217584
Q96CN4	EVI5L	EVI5-like protein OS=Homo sapiens OX=9606 GN=EVI5L PE=1 SV=1	5	3	3	3	794	91.3	5.34	60	108.7	101.5	105.6	91	97.6	95.5	105.267	94.7	-	1.11158	0.0207605
Q9H2U2	PPA2	Inorganic pyrophosphatase 2, mitochondrial OS=Homo sapiens OX=9606 GN=PPA2 PE=1 SV=2	54	17	30	16	334	37.9	7.39	711	105.8	105.7	104.4	94.5	97.7	92	105.3	94.7333	-	1.11154	0.00348512
Q9UL33	TRAPPC2L	Trafficking protein particle complex subunit 2-like protein OS=Homo sapiens OX=9606 GN=TRAPPC2L PE=1 SV=1	32	4	4	4	140	16.1	6.77	46	108.7	102.3	104.9	94.2	93.5	96.5	105.3	94.7333	-	1.11154	0.00692978
Q5T013	HYI	Putative hydroxypyruvate isomerase OS=Homo sapiens OX=9606 GN=HYI PE=1 SV=2	47	9	13	9	277	30.4	5.5	308	108.2	103.6	104	94.5	96.5	93.2	105.267	94.7333	-	1.11119	0.00389081
Q7Z4I7	LIMS2	LIM and senescent cell antigen-like-containing domain protein 2 OS=Homo sapiens OX=9606 GN=LIMS2 PE=1 SV=1	15	6	7	1	341	38.9	8.05	73	115.7	105.7	94.4	100.6	84.6	99	105.267	94.7333	-	1.11119	0.257501
O43432	EIF4G3	Eukaryotic translation initiation factor 4 gamma 3 OS=Homo sapiens OX=9606 GN=EIF4G3 PE=1 SV=2	11	17	28	10	1585	176.5	5.38	548	106.3	102.6	106.9	93.5	93.9	96.8	105.267	94.7333	-	1.11119	0.00344737
Q96K76	USP47	Ubiquitin carboxyl-terminal hydrolase 47 OS=Homo sapiens OX=9606 GN=USP47 PE=1 SV=3	16	19	23	19	1375	157.2	5.08	516	108.3	102	105.5	94.6	94.7	94.9	105.267	94.7333	-	1.11119	0.00446944
B7ZAQ6	GPR89A	Golgi pH regulator A OS=Homo sapiens OX=9606 GN=GPR89A PE=1 SV=2	14	4	4	4	455	52.9	9.28	119	108.9	100.8	106.1	96.8	92.9	94.5	105.267	94.7333	-	1.11119	0.0160828
P49137	MAPKAPK2	MAP kinase-activated protein kinase 2 OS=Homo sapiens OX=9606 GN=MAPKAPK2 PE=1 SV=1	16	7	8	5	400	45.5	8.68	107	121.6	100.7	93.4	92.2	91.8	100.2	105.233	94.7333	-	1.11084	0.30262
O14617	AP3D1	AP-3 complex subunit delta-1 OS=Homo sapiens OX=9606 GN=AP3D1 PE=1 SV=1	33	31	44	31	1153	130.1	8.48	957	105.7	105.2	104.8	93.1	95.1	96	105.233	94.7333	-	1.11084	0.000302834
P31146	CORO1A	Coronin-1A OS=Homo sapiens OX=9606 GN=CORO1A PE=1 SV=4	7	3	3	2	461	51	6.68	62	97.4	105.1	113.2	90.7	95.3	98.2	105.233	94.7333	-	1.11084	0.106476
Q53T59	HS1BP3	HCLS1-binding protein 3 OS=Homo sapiens OX=9606 GN=HS1BP3 PE=1 SV=1	27	9	11	9	392	42.8	5.01	279	109.5	101.5	104.8	91.6	96.1	96.6	105.267	94.7667	-	1.1108	0.0202605
Q9NV70	EXOC1	Exocyst complex component 1 OS=Homo sapiens OX=9606 GN=EXOC1 PE=1 SV=4	20	16	16	16	894	101.9	6.61	152	103.9	103.6	108.3	96.3	93.4	94.6	105.267	94.7667	-	1.1108	0.0037741
O60568	PLOD3	Multifunctional procollagen lysine hydroxylase and glycosyltransferase LH3 OS=Homo sapiens OX=9606 GN=PLOD3 PE=1 SV=1	32	20	28	20	738	84.7	6.05	436	106.8	104.5	104.5	96.5	95.2	92.6	105.267	94.7667	-	1.1108	0.00159788
P32119	PRDX2	Peroxiredoxin-2 OS=Homo sapiens OX=9606 GN=PRDX2 PE=1 SV=5	71	12	31	11	198	21.9	5.97	587	109.6	105.4	100.8	93.3	99.3	91.7	105.267	94.7667	-	1.1108	0.0378237
P23786	CPT2	Carnitine O-palmitoyltransferase 2, mitochondrial OS=Homo sapiens OX=9606 GN=CPT2 PE=1 SV=2	20	10	12	10	658	73.7	8.18	238	107.4	103.2	105.1	96.7	97.3	90.3	105.233	94.7667	-	1.11045	0.0147584
P15586	GNS	N-acetylglucosamine-6-sulfatase OS=Homo sapiens OX=9606 GN=GNS PE=1 SV=3	12	6	7	6	552	62	8.31	135	111.5	101.8	102.4	95.5	95.3	93.5	105.233	94.7667	-	1.11045	0.0308216
O60443	GSDME	Gasdermin-E OS=Homo sapiens OX=9606 GN=GSDME PE=1 SV=2	32	14	20	14	496	54.5	5.17	384	105.9	105.6	104.2	98.5	93.7	92.1	105.233	94.7667	-	1.11045	0.00629035
A6NCE7	MAP1LC3B2	Microtubule-associated proteins 1A/1B light chain 3 beta 2 OS=Homo sapiens OX=9606 GN=MAP1LC3B2 PE=2 SV=1	22	3	6	3	125	14.6	8.68	79	102.9	104.7	108.1	87.5	92.5	104.3	105.233	94.7667	-	1.11045	0.114862
Q9NX20	MRPL16	39S ribosomal protein L16, mitochondrial OS=Homo sapiens OX=9606 GN=MRPL16 PE=1 SV=1	22	4	4	4	251	28.4	10.13	54	104.8	109.4	101.5	98.8	92	93.5	105.233	94.7667	-	1.11045	0.0273922
Q6UW63	POGLUT2	Protein O-glucosyltransferase 2 OS=Homo sapiens OX=9606 GN=POGLUT2 PE=1 SV=1	4	2	2	2	502	58	7.71	28	95.4	93.8	126.5	94.4	94.4	95.5	105.233	94.7667	-	1.11045	0.381342
O15258	RER1	Protein RER1 OS=Homo sapiens OX=9606 GN=RER1 PE=1 SV=1	4	1	2	1	196	22.9	9.54	44	115	101.2	99.5	95.7	94.1	94.5	105.233	94.7667	-	1.11045	0.101063
P11766	ADH5	Alcohol dehydrogenase class-3 OS=Homo sapiens OX=9606 GN=ADH5 PE=1 SV=4	48	14	27	14	374	39.7	7.49	449	106	105.2	104.4	94.2	98	92.1	105.2	94.7667	-	1.11009	0.00429265
Q9BPZ7	MAPKAP1	Target of rapamycin complex 2 subunit MAPKAP1 OS=Homo sapiens OX=9606 GN=MAPKAP1 PE=1 SV=2	2	1	1	1	522	59.1	7.55	25	106	95.6	114	102.9	86.9	94.5	105.2	94.7667	-	1.11009	0.213081
Q8IYB7	DIS3L2	DIS3-like exonuclease 2 OS=Homo sapiens OX=9606 GN=DIS3L2 PE=1 SV=4	10	10	11	10	885	99.2	6.1	152	105.5	105.4	104.7	93.3	96.8	94.2	105.2	94.7667	-	1.11009	0.00064024
Q9P0N9	TBC1D7	TBC1 domain family member 7 OS=Homo sapiens OX=9606 GN=TBC1D7 PE=1 SV=1	11	3	3	3	293	34	7.94	22	111	100	104.7	93.6	92.1	98.7	105.233	94.8	-	1.11006	0.0501175
Q9Y217	MTMR6	Myotubularin-related protein 6 OS=Homo sapiens OX=9606 GN=MTMR6 PE=1 SV=3	24	11	13	11	621	71.9	7.66	328	110.3	104.2	101.2	96.9	92.1	95.4	105.233	94.8	-	1.11006	0.0261994
Q16706	MAN2A1	Alpha-mannosidase 2 OS=Homo sapiens OX=9606 GN=MAN2A1 PE=1 SV=2	18	17	20	15	1144	131.1	7.58	298	107.1	103.4	105.1	94.3	91.1	99	105.2	94.8	-	1.1097	0.0147463
Q9HAS0	C17orf75	Protein Njmu-R1 OS=Homo sapiens OX=9606 GN=C17orf75 PE=1 SV=2	23	8	12	8	396	44.6	5.03	316	104	108.2	103.4	93.5	96.3	94.6	105.2	94.8	-	1.1097	0.00373892
Q3V6T2	CCDC88A	Girdin OS=Homo sapiens OX=9606 GN=CCDC88A PE=1 SV=2	10	17	19	16	1871	215.9	6.21	370	106.6	103.6	105.3	92.9	93.3	98.2	105.167	94.8	-	1.10935	0.00561556
Q00765	REEP5	Receptor expression-enhancing protein 5 OS=Homo sapiens OX=9606 GN=REEP5 PE=1 SV=3	32	7	14	7	189	21.5	8.1	288	105.4	106.1	104	94.4	96.2	93.8	105.167	94.8	-	1.10935	0.00039926
P78539	SRPX	Sushi repeat-containing protein SRPX OS=Homo sapiens OX=9606 GN=SRPX PE=1 SV=1	13	5	6	5	464	51.5	8.66	104	107.1	104.8	103.7	102.1	93.4	89	105.2	94.8333	-	1.10931	0.0596357
Q7KZN9	COX15	Cytochrome c oxidase assembly protein COX15 homolog OS=Homo sapiens OX=9606 GN=COX15 PE=1 SV=1	15	5	7	5	410	46	9.82	70	105.7	100.5	109.4	95.1	96.4	93	105.2	94.8333	-	1.10931	0.0199568
Q71RG4	TMUB2	Transmembrane and ubiquitin-like domain-containing protein 2 OS=Homo sapiens OX=9606 GN=TMUB2 PE=1 SV=2	10	2	2	2	321	33.8	5.03	20	102.8	109.3	103.5	92.3	97.3	94.9	105.2	94.8333	-	1.10931	0.0145993
Q9ULF5	SLC39A10	Zinc transporter ZIP10 OS=Homo sapiens OX=9606 GN=SLC39A10 PE=1 SV=2	7	6	6	6	831	94.1	6.76	97	114.9	98.6	102.1	100.3	86	98.2	105.2	94.8333	-	1.10931	0.194814
O15533	TAPBP	Tapasin OS=Homo sapiens OX=9606 GN=TAPBP PE=1 SV=1	11	5	7	5	448	47.6	7.15	111	104.3	105.3	106	96.1	96.4	92	105.2	94.8333	-	1.10931	0.00231448
P14314	PRKCSH	Glucosidase 2 subunit beta OS=Homo sapiens OX=9606 GN=PRKCSH PE=1 SV=2	37	23	44	23	528	59.4	4.41	660	106.7	106	102.9	96.7	96.2	91.6	105.2	94.8333	-	1.10931	0.00658466
Q9Y3L5	RAP2C	Ras-related protein Rap-2c OS=Homo sapiens OX=9606 GN=RAP2C PE=1 SV=1	54	7	11	2	183	20.7	4.94	282	110.3	96.6	108.6	96.6	92.3	95.6	105.167	94.8333	-	1.10896	0.0834105
Q8TEU7	RAPGEF6	Rap guanine nucleotide exchange factor 6 OS=Homo sapiens OX=9606 GN=RAPGEF6 PE=1 SV=2	4	4	6	3	1601	179.3	6.4	91	104.5	105.2	105.8	101	95.4	88.1	105.167	94.8333	-	1.10896	0.0512177
Q8IVM0	CCDC50	Coiled-coil domain-containing protein 50 OS=Homo sapiens OX=9606 GN=CCDC50 PE=1 SV=1	19	5	6	5	306	35.8	6.65	124	107	103.9	104.6	96.6	94.7	93.2	105.167	94.8333	-	1.10896	0.00160868
O75477	ERLIN1	Erlin-1 OS=Homo sapiens OX=9606 GN=ERLIN1 PE=1 SV=2	46	15	24	12	348	39.1	7.87	516	106.6	105.8	103	98.7	95.4	90.4	105.133	94.8333	-	1.10861	0.017696
Q16658	FSCN1	Fascin OS=Homo sapiens OX=9606 GN=FSCN1 PE=1 SV=3	42	18	25	18	493	54.5	7.24	513	104	105.9	105.5	92	97.7	94.8	105.133	94.8333	-	1.10861	0.00411535
O75923	DYSF	Dysferlin OS=Homo sapiens OX=9606 GN=DYSF PE=1 SV=1	24	39	52	38	2080	237.1	5.64	1038	108.9	104.4	102.1	96.8	94.2	93.5	105.133	94.8333	-	1.10861	0.00996803
Q14161	GIT2	ARF GTPase-activating protein GIT2 OS=Homo sapiens OX=9606 GN=GIT2 PE=1 SV=2	20	12	14	11	759	84.5	7.23	359	106.5	105.7	103.2	95.6	93.4	95.5	105.133	94.8333	-	1.10861	0.00109735
Q9Y3Z3	SAMHD1	Deoxynucleoside triphosphate triphosphohydrolase SAMHD1 OS=Homo sapiens OX=9606 GN=SAMHD1 PE=1 SV=2	48	23	31	23	626	72.2	7.14	524	105.9	104.4	105.2	96	94.3	94.3	105.167	94.8667	-	1.10857	0.000133748
Q15404	RSU1	Ras suppressor protein 1 OS=Homo sapiens OX=9606 GN=RSU1 PE=1 SV=3	54	12	25	12	277	31.5	8.65	723	105.6	104.4	105.5	94.4	95.1	95.1	105.167	94.8667	-	1.10857	2.15259e-05
P19784	CSNK2A2	Casein kinase II subunit alpha' OS=Homo sapiens OX=9606 GN=CSNK2A2 PE=1 SV=1	41	11	13	10	350	41.2	8.56	300	104.4	104.8	106.3	89.7	95.3	99.6	105.167	94.8667	-	1.10857	0.0243894
Q9Y680	FKBP7	Peptidyl-prolyl cis-trans isomerase FKBP7 OS=Homo sapiens OX=9606 GN=FKBP7 PE=1 SV=2	7	1	1	1	222	25.8	6.32	0	110.8	96.9	107.7	99.5	92.3	92.8	105.133	94.8667	-	1.10822	0.0997058
Q494V2	CFAP100	Cilia- and flagella-associated protein 100 OS=Homo sapiens OX=9606 GN=CFAP100 PE=2 SV=1	1	1	1	1	611	71.1	7.11	0	90.3	134.5	90.6	93.5	106.1	85	105.133	94.8667	-	1.10822	0.55392
P27824	CANX	Calnexin OS=Homo sapiens OX=9606 GN=CANX PE=1 SV=2	39	28	64	28	592	67.5	4.6	1068	107.6	106.5	101.3	95.7	95.2	93.7	105.133	94.8667	-	1.10822	0.0072387
Q13615	MTMR3	Myotubularin-related protein 3 OS=Homo sapiens OX=9606 GN=MTMR3 PE=1 SV=3	1	1	1	1	1198	133.5	5.8	21	101.7	95.7	118	94.1	94	96.5	105.133	94.8667	-	1.10822	0.200872
P40123	CAP2	Adenylyl cyclase-associated protein 2 OS=Homo sapiens OX=9606 GN=CAP2 PE=1 SV=1	37	15	23	14	477	52.8	6.37	481	104.8	104.8	105.8	93.4	95	96.2	105.133	94.8667	-	1.10822	0.00030432
Q15904	ATP6AP1	V-type proton ATPase subunit S1 OS=Homo sapiens OX=9606 GN=ATP6AP1 PE=1 SV=2	14	6	6	6	470	52	6.14	115	105.4	99.8	110.1	94.8	93.5	96.3	105.1	94.8667	-	1.10787	0.0294602
O00401	WASL	Neural Wiskott-Aldrich syndrome protein OS=Homo sapiens OX=9606 GN=WASL PE=1 SV=2	26	9	10	9	505	54.8	7.93	300	105.4	105.3	104.6	91.8	95.9	96.9	105.1	94.8667	-	1.10787	0.00293161
Q9NRF8	CTPS2	CTP synthase 2 OS=Homo sapiens OX=9606 GN=CTPS2 PE=1 SV=1	21	13	15	10	586	65.6	6.9	191	107.6	102.6	105.2	95.4	95.6	93.7	105.133	94.9	-	1.10783	0.00282364
Q13454	TUSC3	Tumor suppressor candidate 3 OS=Homo sapiens OX=9606 GN=TUSC3 PE=1 SV=1	11	5	6	4	348	39.7	9.91	88	106.7	103.8	104.8	98.7	93.2	92.8	105.1	94.9	-	1.10748	0.00808806
Q08AF3	SLFN5	Schlafen family member 5 OS=Homo sapiens OX=9606 GN=SLFN5 PE=1 SV=1	10	7	9	7	891	101	8.22	129	109.6	102.9	102.8	93.7	96.7	94.3	105.1	94.9	-	1.10748	0.0137169
Q9BTV4	TMEM43	Transmembrane protein 43 OS=Homo sapiens OX=9606 GN=TMEM43 PE=1 SV=1	48	17	24	17	400	44.8	8.13	500	104.4	105	105.9	96.2	96.4	92.1	105.1	94.9	-	1.10748	0.00225063
P35754	GLRX	Glutaredoxin-1 OS=Homo sapiens OX=9606 GN=GLRX PE=1 SV=2	39	4	9	4	106	11.8	8.09	326	106.5	105.5	103.3	93.9	96.7	94.1	105.1	94.9	-	1.10748	0.00145206
Q96J84	KIRREL1	Kin of IRRE-like protein 1 OS=Homo sapiens OX=9606 GN=KIRREL1 PE=1 SV=2	7	3	3	3	757	83.5	5.73	99	113.6	97.2	104.5	97.2	90.6	96.9	105.1	94.9	-	1.10748	0.121811
Q9UJF2	RASAL2	Ras GTPase-activating protein nGAP OS=Homo sapiens OX=9606 GN=RASAL2 PE=1 SV=2	6	6	7	5	1139	128.5	8.24	72	107.2	103.3	104.8	95.9	92.4	96.5	105.1	94.9333	-	1.10709	0.00401554
P61020	RAB5B	Ras-related protein Rab-5B OS=Homo sapiens OX=9606 GN=RAB5B PE=1 SV=1	60	8	18	5	215	23.7	8.13	489	104.5	106.5	104.3	93.5	97.3	94	105.1	94.9333	-	1.10709	0.00182689
Q8IVF7	FMNL3	Formin-like protein 3 OS=Homo sapiens OX=9606 GN=FMNL3 PE=1 SV=3	8	8	11	4	1028	117.1	6.65	148	105.3	104.6	105.4	97.9	92.8	94.1	105.1	94.9333	-	1.10709	0.00279864
Q5SWX8	ODR4	Protein odr-4 homolog OS=Homo sapiens OX=9606 GN=ODR4 PE=1 SV=1	23	9	10	9	454	51.1	5.92	160	106.1	104.2	104.9	96.6	93.5	94.7	105.067	94.9333	-	1.10674	0.00066727
Q9BYX2	TBC1D2	TBC1 domain family member 2A OS=Homo sapiens OX=9606 GN=TBC1D2 PE=1 SV=3	15	11	16	11	928	105.3	6.58	380	105.9	105.2	104.1	97.4	93.6	93.8	105.067	94.9333	-	1.10674	0.00164459
Q9BTY2	FUCA2	Plasma alpha-L-fucosidase OS=Homo sapiens OX=9606 GN=FUCA2 PE=1 SV=2	5	2	3	2	467	54	6.25	84	108.4	97.7	109.1	95.9	95	93.9	105.067	94.9333	-	1.10674	0.0533244
Q5VV42	CDKAL1	Threonylcarbamoyladenosine tRNA methylthiotransferase OS=Homo sapiens OX=9606 GN=CDKAL1 PE=1 SV=1	22	10	13	10	579	65.1	7.46	293	108.4	102.2	104.6	93.8	90.8	100.2	105.067	94.9333	-	1.10674	0.0375348
P06756	ITGAV	Integrin alpha-V OS=Homo sapiens OX=9606 GN=ITGAV PE=1 SV=2	34	26	29	26	1048	116	5.68	770	109.1	102.6	103.5	94.3	96.4	94.1	105.067	94.9333	-	1.10674	0.00940313
P29323	EPHB2	Ephrin type-B receptor 2 OS=Homo sapiens OX=9606 GN=EPHB2 PE=1 SV=5	13	10	12	7	1055	117.4	6.55	221	106.6	103.2	105.4	95.4	94	95.4	105.067	94.9333	-	1.10674	0.000770149
P78537	BLOC1S1	Biogenesis of lysosome-related organelles complex 1 subunit 1 OS=Homo sapiens OX=9606 GN=BLOC1S1 PE=1 SV=2	26	2	3	2	153	17.3	9.33	71	108.2	105.5	101.5	97	96.1	91.7	105.067	94.9333	-	1.10674	0.0163442
Q6PID6	TTC33	Tetratricopeptide repeat protein 33 OS=Homo sapiens OX=9606 GN=TTC33 PE=1 SV=2	7	1	1	1	262	29.4	5.44	30	109.9	100.5	104.8	104.4	89.6	90.8	105.067	94.9333	-	1.10674	0.13751
Q9UPW5	AGTPBP1	Cytosolic carboxypeptidase 1 OS=Homo sapiens OX=9606 GN=AGTPBP1 PE=1 SV=3	1	1	1	1	1226	138.4	6.15	38	100.9	98.5	115.8	91.4	93.2	100.2	105.067	94.9333	-	1.10674	0.168727
P11310	ACADM	Medium-chain specific acyl-CoA dehydrogenase, mitochondrial OS=Homo sapiens OX=9606 GN=ACADM PE=1 SV=1	33	13	18	13	421	46.6	8.37	412	106.5	105.2	103.5	93.5	97.6	93.7	105.067	94.9333	-	1.10674	0.0031259
P07602	PSAP	Prosaposin OS=Homo sapiens OX=9606 GN=PSAP PE=1 SV=2	40	21	36	21	524	58.1	5.17	667	114.2	101	100	96.2	93.6	95	105.067	94.9333	-	1.10674	0.0941853
P46527	CDKN1B	Cyclin-dependent kinase inhibitor 1B OS=Homo sapiens OX=9606 GN=CDKN1B PE=1 SV=1	4	1	1	1	198	22.1	7.02	31	108.1	107.2	99.8	95.3	91.6	97.9	105.033	94.9333	-	1.10639	0.0343864
Q9UQ03	CORO2B	Coronin-2B OS=Homo sapiens OX=9606 GN=CORO2B PE=1 SV=4	21	9	10	9	480	54.9	8.27	97	106.7	105	103.4	97.6	94.8	92.4	105.033	94.9333	-	1.10639	0.00475188
Q9Y2W6	TDRKH	Tudor and KH domain-containing protein OS=Homo sapiens OX=9606 GN=TDRKH PE=1 SV=2	7	3	3	3	561	62	5.02	85	108.4	106.5	100.2	91.6	94.7	98.5	105.033	94.9333	-	1.10639	0.0337103
P52655	GTF2A1	Transcription initiation factor IIA subunit 1 OS=Homo sapiens OX=9606 GN=GTF2A1 PE=1 SV=1	7	2	2	2	376	41.5	4.55	89	116.1	97.1	101.9	93.2	89	102.6	105.033	94.9333	-	1.10639	0.221379
O15127	SCAMP2	Secretory carrier-associated membrane protein 2 OS=Homo sapiens OX=9606 GN=SCAMP2 PE=1 SV=2	19	5	6	5	329	36.6	6.1	186	106.7	103.7	104.8	92.3	98.2	94.4	105.067	94.9667	-	1.10635	0.00644336
Q92466	DDB2	DNA damage-binding protein 2 OS=Homo sapiens OX=9606 GN=DDB2 PE=1 SV=1	2	1	1	1	427	47.8	9.47	0	108	100.1	107.1	95.2	92.7	97	105.067	94.9667	-	1.10635	0.0223779
Q6P158	DHX57	Putative ATP-dependent RNA helicase DHX57 OS=Homo sapiens OX=9606 GN=DHX57 PE=1 SV=2	7	7	8	5	1386	155.5	7.71	173	102.5	106.1	106.5	95.5	95.8	93.6	105.033	94.9667	-	1.106	0.00224023
P09525	ANXA4	Annexin A4 OS=Homo sapiens OX=9606 GN=ANXA4 PE=1 SV=4	58	17	24	16	319	35.9	6.13	587	107.7	104.7	102.7	94.7	98.2	92	105.033	94.9667	-	1.106	0.0120673
Q8TBZ0	CCDC110	Coiled-coil domain-containing protein 110 OS=Homo sapiens OX=9606 GN=CCDC110 PE=1 SV=1	1	1	1	1	833	96.7	6.24	0	110.1	103.4	101.6	103.6	90.6	90.7	105.033	94.9667	-	1.106	0.116053
Q96CC6	RHBDF1	Inactive rhomboid protein 1 OS=Homo sapiens OX=9606 GN=RHBDF1 PE=1 SV=2	3	2	2	2	855	97.3	8.44	30	106.5	111.5	97.1	95.7	93.5	95.7	105.033	94.9667	-	1.106	0.078546
Q8N5K1	CISD2	CDGSH iron-sulfur domain-containing protein 2 OS=Homo sapiens OX=9606 GN=CISD2 PE=1 SV=1	56	8	12	8	135	15.3	9.61	240	105.8	103	106.3	93.9	97.1	93.9	105.033	94.9667	-	1.106	0.00244457
O15020	SPTBN2	Spectrin beta chain, non-erythrocytic 2 OS=Homo sapiens OX=9606 GN=SPTBN2 PE=1 SV=3	6	14	19	4	2390	271.2	6.11	307	104.5	106	104.6	93.3	91.6	100	105.033	94.9667	-	1.106	0.0181802
Q96I51	RCC1L	RCC1-like G exchanging factor-like protein OS=Homo sapiens OX=9606 GN=RCC1L PE=1 SV=2	9	2	2	2	464	50	8.4	26	97.7	101.3	116.1	95.9	92.7	96.3	105.033	94.9667	-	1.106	0.154564
Q86WA6	BPHL	Valacyclovir hydrolase OS=Homo sapiens OX=9606 GN=BPHL PE=1 SV=1	14	4	4	4	291	32.5	9.14	52	109.7	100.9	104.5	95.7	95.4	93.8	105.033	94.9667	-	1.106	0.0184587
P08581	MET	Hepatocyte growth factor receptor OS=Homo sapiens OX=9606 GN=MET PE=1 SV=4	3	3	3	3	1390	155.4	7.33	69	110.8	101.6	102.7	92.2	93.1	99.6	105.033	94.9667	-	1.106	0.0538112
Q9NUI1	DECR2	Peroxisomal 2,4-dienoyl-CoA reductase OS=Homo sapiens OX=9606 GN=DECR2 PE=1 SV=1	6	2	2	2	292	30.8	9.22	32	98.1	101.7	115.2	93.3	93.8	97.8	105	94.9667	-	1.10565	0.1365
O14920	IKBKB	Inhibitor of nuclear factor kappa-B kinase subunit beta OS=Homo sapiens OX=9606 GN=IKBKB PE=1 SV=1	21	10	14	10	756	86.5	5.78	226	103.9	107	104.1	92.7	94	98.2	105	94.9667	-	1.10565	0.00662533
P60709	ACTB	Actin, cytoplasmic 1 OS=Homo sapiens OX=9606 GN=ACTB PE=1 SV=1	79	25	464	1	375	41.7	5.48	15282	108	104.3	102.8	95.9	95.5	93.6	105.033	95	-	1.10561	0.00412676
O95819	MAP4K4	Mitogen-activated protein kinase kinase kinase kinase 4 OS=Homo sapiens OX=9606 GN=MAP4K4 PE=1 SV=2	18	18	20	11	1239	142	7.46	419	107	102.5	105.5	93.8	95.5	95.7	105	95	-	1.10526	0.00234018
Q9H0P0	NT5C3A	Cytosolic 5'-nucleotidase 3A OS=Homo sapiens OX=9606 GN=NT5C3A PE=1 SV=3	26	7	9	7	336	37.9	7.12	264	106.4	104.1	104.5	94.5	90.2	100.3	105	95	-	1.10526	0.0293496
Q16595	FXN	Frataxin, mitochondrial OS=Homo sapiens OX=9606 GN=FXN PE=1 SV=2	6	1	2	1	210	23.1	8.69	43	106.8	104.8	103.4	93.8	95.4	95.8	105	95	-	1.10526	0.000996905
O15213	WDR46	WD repeat-containing protein 46 OS=Homo sapiens OX=9606 GN=WDR46 PE=1 SV=3	12	4	4	4	610	68	9.67	117	106.1	108.2	100.7	99.6	91.4	94	105	95	-	1.10526	0.0385222
Q9Y3C8	UFC1	Ubiquitin-fold modifier-conjugating enzyme 1 OS=Homo sapiens OX=9606 GN=UFC1 PE=1 SV=3	25	5	6	5	167	19.4	7.4	26	105.9	102.5	106.6	90.3	94	100.7	105	95	-	1.10526	0.0386456
P24539	ATP5PB	ATP synthase F(0) complex subunit B1, mitochondrial OS=Homo sapiens OX=9606 GN=ATP5PB PE=1 SV=2	35	10	18	10	256	28.9	9.36	310	104.2	103.8	107	95.4	94	95.7	105	95.0333	-	1.10488	0.000926831
Q9BW62	KATNAL1	Katanin p60 ATPase-containing subunit A-like 1 OS=Homo sapiens OX=9606 GN=KATNAL1 PE=1 SV=1	22	8	10	7	490	55.4	6.74	259	107.7	102.7	104.6	92.5	96	96.6	105	95.0333	-	1.10488	0.00678454
P09758	TACSTD2	Tumor-associated calcium signal transducer 2 OS=Homo sapiens OX=9606 GN=TACSTD2 PE=1 SV=3	20	5	6	5	323	35.7	8.87	161	106.8	102.3	105.7	93	97.1	94.9	104.933	95	-	1.10456	0.00525735
Q8N983	MRPL43	39S ribosomal protein L43, mitochondrial OS=Homo sapiens OX=9606 GN=MRPL43 PE=1 SV=1	13	3	3	3	215	23.4	8.65	64	105.8	104.2	104.9	96.3	92.1	96.7	104.967	95.0333	-	1.10452	0.00299055
Q9NVG8	TBC1D13	TBC1 domain family member 13 OS=Homo sapiens OX=9606 GN=TBC1D13 PE=1 SV=3	42	14	17	14	400	46.5	5.24	278	107.5	104.7	102.7	94.3	96.5	94.3	104.967	95.0333	-	1.10452	0.00321926
P52888	THOP1	Thimet oligopeptidase OS=Homo sapiens OX=9606 GN=THOP1 PE=1 SV=2	43	26	37	26	689	78.8	6.05	613	103.2	106.3	105.4	94.4	96.4	94.3	104.967	95.0333	-	1.10452	0.000978004
Q9Y5X2	SNX8	Sorting nexin-8 OS=Homo sapiens OX=9606 GN=SNX8 PE=1 SV=1	7	3	6	3	465	52.5	7.39	196	105.6	103.4	105.9	93.7	94.1	97.3	104.967	95.0333	-	1.10452	0.00200246
P67936	TPM4	Tropomyosin alpha-4 chain OS=Homo sapiens OX=9606 GN=TPM4 PE=1 SV=3	75	30	56	20	248	28.5	4.69	1053	105.5	106.6	102.8	96.1	94.7	94.3	104.967	95.0333	-	1.10452	0.0013741
Q13286	CLN3	Battenin OS=Homo sapiens OX=9606 GN=CLN3 PE=1 SV=1	3	1	1	1	438	47.6	6.38	23	105.7	101.2	108	89.9	89.7	105.5	104.967	95.0333	-	1.10452	0.150862
Q8WZA9	IRGQ	Immunity-related GTPase family Q protein OS=Homo sapiens OX=9606 GN=IRGQ PE=1 SV=1	31	13	16	13	623	62.7	4.88	537	104.6	102.4	107.8	96.4	95	93.7	104.933	95.0333	-	1.10417	0.0048205
Q9NP92	MRPS30	39S ribosomal protein S30, mitochondrial OS=Homo sapiens OX=9606 GN=MRPS30 PE=1 SV=2	20	6	6	6	439	50.3	7.97	93	108.3	103.8	102.7	96	93.3	95.8	104.933	95.0333	-	1.10417	0.00672346
P53680	AP2S1	AP-2 complex subunit sigma OS=Homo sapiens OX=9606 GN=AP2S1 PE=1 SV=2	44	7	10	7	142	17	6.18	169	104.8	100.7	109.3	96.5	94.8	93.8	104.933	95.0333	-	1.10417	0.0191105
Q9H6R7	WDCP	WD repeat and coiled-coil-containing protein OS=Homo sapiens OX=9606 GN=WDCP PE=1 SV=1	1	1	1	1	721	79.1	6.7	18	103.6	104.8	106.5	96.8	94.4	94	104.967	95.0667	-	1.10414	0.00122821
P61803	DAD1	Dolichyl-diphosphooligosaccharide--protein glycosyltransferase subunit DAD1 OS=Homo sapiens OX=9606 GN=DAD1 PE=1 SV=3	35	4	8	4	113	12.5	7.08	124	101.3	106.2	107.4	88.2	91.4	105.6	104.967	95.0667	-	1.10414	0.155357
Q9Y484	WDR45	WD repeat domain phosphoinositide-interacting protein 4 OS=Homo sapiens OX=9606 GN=WDR45 PE=1 SV=1	18	6	6	6	360	39.8	7.14	66	104	106	104.8	97.6	94.8	92.8	104.933	95.0667	-	1.10379	0.00282375
Q9UQR1	ZNF148	Zinc finger protein 148 OS=Homo sapiens OX=9606 GN=ZNF148 PE=1 SV=2	7	4	4	4	794	88.9	6.48	38	93	103.4	118.4	96.3	94.7	94.2	104.933	95.0667	-	1.10379	0.25326
P13797	PLS3	Plastin-3 OS=Homo sapiens OX=9606 GN=PLS3 PE=1 SV=4	56	32	61	23	630	70.8	5.6	1283	105.2	107.5	102.1	94.6	96.9	93.7	104.933	95.0667	-	1.10379	0.00574453
Q9UKM7	MAN1B1	Endoplasmic reticulum mannosyl-oligosaccharide 1,2-alpha-mannosidase OS=Homo sapiens OX=9606 GN=MAN1B1 PE=1 SV=2	6	3	4	3	699	79.5	7.72	135	113.8	98	103	98.2	91.1	95.9	104.933	95.0667	-	1.10379	0.125693
O75223	GGCT	Gamma-glutamylcyclotransferase OS=Homo sapiens OX=9606 GN=GGCT PE=1 SV=1	57	9	13	9	188	21	5.14	408	106.7	105	103.1	95.4	94.7	95.1	104.933	95.0667	-	1.10379	0.00073955
Q93050	ATP6V0A1	V-type proton ATPase 116 kDa subunit a isoform 1 OS=Homo sapiens OX=9606 GN=ATP6V0A1 PE=1 SV=3	18	10	16	10	837	96.4	6.43	313	106.3	103.5	104.9	93.3	97.1	94.8	104.9	95.0667	-	1.10344	0.00199046
P54289	CACNA2D1	Voltage-dependent calcium channel subunit alpha-2/delta-1 OS=Homo sapiens OX=9606 GN=CACNA2D1 PE=1 SV=3	2	2	2	2	1103	124.5	5.27	17	105.2	104.6	104.9	91.5	98.3	95.4	104.9	95.0667	-	1.10344	0.00763941
Q13131	PRKAA1	5'-AMP-activated protein kinase catalytic subunit alpha-1 OS=Homo sapiens OX=9606 GN=PRKAA1 PE=1 SV=4	29	13	16	10	559	64	8.12	365	105.9	105.5	103.3	96	94.8	94.4	104.9	95.0667	-	1.10344	0.000472781
Q6P1M0	SLC27A4	Long-chain fatty acid transport protein 4 OS=Homo sapiens OX=9606 GN=SLC27A4 PE=1 SV=1	24	14	17	13	643	72	8.47	193	105.3	105.8	103.6	97.2	93.1	94.9	104.9	95.0667	-	1.10344	0.00194412
P17900	GM2A	Ganglioside GM2 activator OS=Homo sapiens OX=9606 GN=GM2A PE=1 SV=4	23	4	5	4	193	20.8	5.31	84	112.7	101.2	100.8	94.8	98.4	92	104.9	95.0667	-	1.10344	0.085094
Q9NVX0	HAUS2	HAUS augmin-like complex subunit 2 OS=Homo sapiens OX=9606 GN=HAUS2 PE=1 SV=1	12	2	2	2	235	26.9	7.88	48	91.4	98.8	124.6	92.6	93.3	99.4	104.933	95.1	-	1.1034	0.393454
Q8WU79	SMAP2	Stromal membrane-associated protein 2 OS=Homo sapiens OX=9606 GN=SMAP2 PE=1 SV=1	10	4	6	4	429	46.8	8.87	55	108.6	97.7	108.5	98.6	90.2	96.5	104.933	95.1	-	1.1034	0.0896499
P98194	ATP2C1	Calcium-transporting ATPase type 2C member 1 OS=Homo sapiens OX=9606 GN=ATP2C1 PE=1 SV=3	7	5	7	5	919	100.5	6.74	237	105.2	103.3	106.2	97.2	94	94.1	104.9	95.1	-	1.10305	0.00192048
P19012	KRT15	Keratin, type I cytoskeletal 15 OS=Homo sapiens OX=9606 GN=KRT15 PE=1 SV=3	14	8	14	1	456	49.2	4.77	195	104.9	107.2	102.6	91.9	96.9	96.5	104.9	95.1	-	1.10305	0.00926739
P29597	TYK2	Non-receptor tyrosine-protein kinase TYK2 OS=Homo sapiens OX=9606 GN=TYK2 PE=1 SV=3	2	1	1	1	1187	133.6	7.15	24	103.5	103.6	107.6	94.3	92.2	98.8	104.9	95.1	-	1.10305	0.0144194
Q9P015	MRPL15	39S ribosomal protein L15, mitochondrial OS=Homo sapiens OX=9606 GN=MRPL15 PE=1 SV=1	30	7	8	7	296	33.4	10.01	147	101	102.6	111.1	97.6	94.2	93.5	104.9	95.1	-	1.10305	0.0441569
Q8TBP6	SLC25A40	Solute carrier family 25 member 40 OS=Homo sapiens OX=9606 GN=SLC25A40 PE=1 SV=1	5	1	1	1	338	38.1	9.35	0	109.4	102	103.3	102.4	89.7	93.2	104.9	95.1	-	1.10305	0.0909543
Q9H490	PIGU	Phosphatidylinositol glycan anchor biosynthesis class U protein OS=Homo sapiens OX=9606 GN=PIGU PE=1 SV=3	11	4	5	4	435	50	7.72	118	106.5	106.2	102	94.8	96.7	93.8	104.9	95.1	-	1.10305	0.00433424
P46939	UTRN	Utrophin OS=Homo sapiens OX=9606 GN=UTRN PE=1 SV=2	23	64	77	64	3433	394.2	5.33	1925	103.4	106	105.4	94.7	96	94.7	104.933	95.1333	-	1.10301	0.000399517
Q8NBQ5	HSD17B11	Estradiol 17-beta-dehydrogenase 11 OS=Homo sapiens OX=9606 GN=HSD17B11 PE=1 SV=3	23	6	9	6	300	32.9	9.07	226	103.3	105.3	106	94.8	98.4	92.1	104.867	95.1	-	1.1027	0.00808541
Q86SF2	GALNT7	N-acetylgalactosaminyltransferase 7 OS=Homo sapiens OX=9606 GN=GALNT7 PE=1 SV=1	17	8	11	8	657	75.3	7.11	232	108.2	104.8	101.6	95.7	96.5	93.1	104.867	95.1	-	1.1027	0.0107195
Q9UK61	TASOR	Protein TASOR OS=Homo sapiens OX=9606 GN=TASOR PE=1 SV=3	6	10	10	10	1670	188.9	5.8	189	112.9	98.7	103	94.4	92.9	98	104.867	95.1	-	1.1027	0.0941286
O95470	SGPL1	Sphingosine-1-phosphate lyase 1 OS=Homo sapiens OX=9606 GN=SGPL1 PE=1 SV=3	27	13	15	13	568	63.5	9.16	351	104.8	105.5	104.3	95.6	95	94.7	104.867	95.1	-	1.1027	2.37662e-05
O60563	CCNT1	Cyclin-T1 OS=Homo sapiens OX=9606 GN=CCNT1 PE=1 SV=1	8	5	5	3	726	80.6	8.78	33	94.6	98.5	121.5	95.3	98.2	91.8	104.867	95.1	-	1.1027	0.319236
Q9NR12	PDLIM7	PDZ and LIM domain protein 7 OS=Homo sapiens OX=9606 GN=PDLIM7 PE=1 SV=1	38	14	23	14	457	49.8	8.41	226	104.8	106.3	103.5	94	94	97.3	104.867	95.1	-	1.1027	0.00202158
P12694	BCKDHA	2-oxoisovalerate dehydrogenase subunit alpha, mitochondrial OS=Homo sapiens OX=9606 GN=BCKDHA PE=1 SV=2	4	2	2	2	445	50.4	8.27	22	98.1	100.2	116.4	96.4	97.7	91.3	104.9	95.1333	-	1.10266	0.184772
Q9Y4F1	FARP1	FERM, ARHGEF and pleckstrin domain-containing protein 1 OS=Homo sapiens OX=9606 GN=FARP1 PE=1 SV=1	15	11	11	11	1045	118.6	8.15	205	104.8	102.1	107.8	95.8	94.8	94.8	104.9	95.1333	-	1.10266	0.00435397
Q15154	PCM1	Pericentriolar material 1 protein OS=Homo sapiens OX=9606 GN=PCM1 PE=1 SV=5	7	11	13	10	2024	228.4	5.02	196	103.9	102.5	108.3	96.6	91	97.8	104.9	95.1333	-	1.10266	0.0231767
O15066	KIF3B	Kinesin-like protein KIF3B OS=Homo sapiens OX=9606 GN=KIF3B PE=1 SV=1	11	7	8	7	747	85.1	7.69	246	106.4	103.5	104.7	97.4	94	94	104.867	95.1333	-	1.10231	0.00231858
O14936	CASK	Peripheral plasma membrane protein CASK OS=Homo sapiens OX=9606 GN=CASK PE=1 SV=3	17	13	13	13	926	105.1	6.43	219	107.1	104	103.5	93.2	97.1	95.1	104.867	95.1333	-	1.10231	0.00362642
Q9BZF3	OSBPL6	Oxysterol-binding protein-related protein 6 OS=Homo sapiens OX=9606 GN=OSBPL6 PE=1 SV=1	16	13	15	12	934	106.2	6.93	251	109.3	100.7	104.6	95.2	93.6	96.6	104.867	95.1333	-	1.10231	0.020894
Q9H019	MTFR1L	Mitochondrial fission regulator 1-like OS=Homo sapiens OX=9606 GN=MTFR1L PE=1 SV=2	6	1	1	1	292	31.9	6.1	18	110.7	96	107.9	95.5	95.6	94.3	104.867	95.1333	-	1.10231	0.0979084
P13489	RNH1	Ribonuclease inhibitor OS=Homo sapiens OX=9606 GN=RNH1 PE=1 SV=2	77	24	52	24	461	49.9	4.82	1707	103.3	104.4	106.9	95.5	95.7	94.2	104.867	95.1333	-	1.10231	0.00111946
P07919	UQCRH	Cytochrome b-c1 complex subunit 6, mitochondrial OS=Homo sapiens OX=9606 GN=UQCRH PE=1 SV=2	46	5	7	5	91	10.7	4.44	152	105.7	106.5	102.4	98.9	93.8	92.7	104.867	95.1333	-	1.10231	0.0130613
Q9Y478	PRKAB1	5'-AMP-activated protein kinase subunit beta-1 OS=Homo sapiens OX=9606 GN=PRKAB1 PE=1 SV=4	10	2	2	2	270	30.4	6.4	43	107.2	100.3	107.1	92.1	93.4	99.9	104.867	95.1333	-	1.10231	0.0428147
P84085	ARF5	ADP-ribosylation factor 5 OS=Homo sapiens OX=9606 GN=ARF5 PE=1 SV=2	72	11	39	6	180	20.5	6.79	1084	105.4	104	105.2	94.7	94.3	96.4	104.867	95.1333	-	1.10231	0.000235033
Q9NUY8	TBC1D23	TBC1 domain family member 23 OS=Homo sapiens OX=9606 GN=TBC1D23 PE=1 SV=3	19	10	13	10	699	78.3	5.41	358	105.8	105.6	103.2	94.9	93.4	97.1	104.867	95.1333	-	1.10231	0.00202257
Q8IX04	UEVLD	Ubiquitin-conjugating enzyme E2 variant 3 OS=Homo sapiens OX=9606 GN=UEVLD PE=1 SV=2	10	5	6	5	471	52.2	7.09	127	110.8	102.3	101.4	97.4	93	95	104.833	95.1333	-	1.10196	0.040684
O00471	EXOC5	Exocyst complex component 5 OS=Homo sapiens OX=9606 GN=EXOC5 PE=1 SV=1	21	13	17	13	708	81.8	6.71	258	105.5	102.7	106.4	92.7	97.2	95.6	104.867	95.1667	-	1.10193	0.00491777
P22307	SCP2	Non-specific lipid-transfer protein OS=Homo sapiens OX=9606 GN=SCP2 PE=1 SV=2	22	12	25	12	547	59	6.89	606	107.1	103.6	103.9	93.1	98.4	94	104.867	95.1667	-	1.10193	0.00810468
Q15363	TMED2	Transmembrane emp24 domain-containing protein 2 OS=Homo sapiens OX=9606 GN=TMED2 PE=1 SV=1	35	7	22	7	201	22.7	5.17	441	104.8	106.1	103.7	93	97.9	94.6	104.867	95.1667	-	1.10193	0.00374368
Q8N490	PNKD	Probable hydrolase PNKD OS=Homo sapiens OX=9606 GN=PNKD PE=1 SV=2	2	1	1	1	385	42.8	9.09	33	103.9	104.8	105.8	92.8	98.4	94.3	104.833	95.1667	-	1.10158	0.00536911
Q9Y4I1	MYO5A	Unconventional myosin-Va OS=Homo sapiens OX=9606 GN=MYO5A PE=1 SV=2	3	5	5	5	1855	215.3	8.48	64	100.2	103.1	111.2	83.6	94	107.9	104.833	95.1667	-	1.10158	0.281418
P49189	ALDH9A1	4-trimethylaminobutyraldehyde dehydrogenase OS=Homo sapiens OX=9606 GN=ALDH9A1 PE=1 SV=3	52	22	44	22	494	53.8	5.87	1054	104.4	106.3	103.8	96.9	96	92.6	104.833	95.1667	-	1.10158	0.00306309
Q16540	MRPL23	39S ribosomal protein L23, mitochondrial OS=Homo sapiens OX=9606 GN=MRPL23 PE=1 SV=1	25	4	5	4	153	17.8	9.69	41	104.8	103.5	106.2	96.3	92.7	96.5	104.833	95.1667	-	1.10158	0.00270005
Q6FI81	CIAPIN1	Anamorsin OS=Homo sapiens OX=9606 GN=CIAPIN1 PE=1 SV=2	50	13	19	13	312	33.6	5.62	218	109.5	104.2	100.8	94.3	94.2	97	104.833	95.1667	-	1.10158	0.0229539
Q5W0V3	FAM160B1	Protein FAM160B1 OS=Homo sapiens OX=9606 GN=FAM160B1 PE=1 SV=1	22	13	14	13	765	86.5	5.29	343	105.4	104.6	104.5	95.4	96.1	94	104.833	95.1667	-	1.10158	0.000142088
P39656	DDOST	Dolichyl-diphosphooligosaccharide--protein glycosyltransferase 48 kDa subunit OS=Homo sapiens OX=9606 GN=DDOST PE=1 SV=4	39	13	25	13	456	50.8	6.55	565	106.6	106.5	101.3	95.7	96.1	93.7	104.8	95.1667	-	1.10123	0.00714512
P82914	MRPS15	28S ribosomal protein S15, mitochondrial OS=Homo sapiens OX=9606 GN=MRPS15 PE=1 SV=1	25	7	8	7	257	29.8	10.48	83	107.4	101.9	105.2	98.3	93.2	94.1	104.833	95.2	-	1.10119	0.012669
P51808	DYNLT3	Dynein light chain Tctex-type 3 OS=Homo sapiens OX=9606 GN=DYNLT3 PE=1 SV=1	15	1	1	1	116	13.1	5.66	40	106.2	109.1	99.2	95.4	92	98.2	104.833	95.2	-	1.10119	0.0488757
Q13641	TPBG	Trophoblast glycoprotein OS=Homo sapiens OX=9606 GN=TPBG PE=1 SV=1	12	5	6	5	420	46	6.83	152	102.5	101.2	110.8	96.8	92.9	95.9	104.833	95.2	-	1.10119	0.0406297
O14879	IFIT3	Interferon-induced protein with tetratricopeptide repeats 3 OS=Homo sapiens OX=9606 GN=IFIT3 PE=1 SV=1	10	4	6	4	490	56	5.2	174	105.5	105.4	103.5	94.8	96.4	94.4	104.8	95.2	-	1.10084	0.00042364
Q99426	TBCB	Tubulin-folding cofactor B OS=Homo sapiens OX=9606 GN=TBCB PE=1 SV=2	30	7	11	7	244	27.3	5.15	227	104	105.2	105.2	93.8	96.7	95.1	104.8	95.2	-	1.10084	0.000495195
Q96QR8	PURB	Transcriptional activator protein Pur-beta OS=Homo sapiens OX=9606 GN=PURB PE=1 SV=3	50	8	9	8	312	33.2	5.43	231	104	105.8	104.7	93.6	97.4	94.7	104.833	95.2333	-	1.10081	0.00152037
Q9BSJ8	ESYT1	Extended synaptotagmin-1 OS=Homo sapiens OX=9606 GN=ESYT1 PE=1 SV=1	43	34	53	34	1104	122.8	5.83	1446	103.9	102.8	107.6	91.1	96.9	97.6	104.767	95.2	-	1.10049	0.0191682
P51956	NEK3	Serine/threonine-protein kinase Nek3 OS=Homo sapiens OX=9606 GN=NEK3 PE=1 SV=2	5	1	1	1	506	57.7	7.17	116	102.3	108.5	103.5	94.3	99.3	92	104.767	95.2	-	1.10049	0.0290749
Q96A65	EXOC4	Exocyst complex component 4 OS=Homo sapiens OX=9606 GN=EXOC4 PE=1 SV=1	20	16	18	16	974	110.4	6.49	430	105.7	103.1	105.5	98.7	93.4	93.5	104.767	95.2	-	1.10049	0.00785652
Q9UBI1	COMMD3	COMM domain-containing protein 3 OS=Homo sapiens OX=9606 GN=COMMD3 PE=1 SV=1	42	6	10	6	195	22.1	5.99	247	105.4	103.8	105.1	95.3	92.9	97.4	104.767	95.2	-	1.10049	0.00233332
Q16831	UPP1	Uridine phosphorylase 1 OS=Homo sapiens OX=9606 GN=UPP1 PE=1 SV=1	51	14	19	14	310	33.9	7.88	324	105.5	104.9	104	96.3	93.3	96.1	104.8	95.2333	-	1.10046	0.000840804
Q9NXW2	DNAJB12	DnaJ homolog subfamily B member 12 OS=Homo sapiens OX=9606 GN=DNAJB12 PE=1 SV=5	12	4	4	3	375	41.8	8.69	94	106.2	105.9	102.2	93.2	91.5	101	104.767	95.2333	-	1.10011	0.0405899
O75874	IDH1	Isocitrate dehydrogenase [NADP] cytoplasmic OS=Homo sapiens OX=9606 GN=IDH1 PE=1 SV=2	46	17	31	17	414	46.6	7.01	793	106.5	105	102.8	94.8	97.8	93.1	104.767	95.2333	-	1.10011	0.00544955
O00425	IGF2BP3	Insulin-like growth factor 2 mRNA-binding protein 3 OS=Homo sapiens OX=9606 GN=IGF2BP3 PE=1 SV=2	40	20	28	17	579	63.7	8.87	547	105.4	105.9	103	99.2	95.5	91	104.767	95.2333	-	1.10011	0.0197431
Q14689	DIP2A	Disco-interacting protein 2 homolog A OS=Homo sapiens OX=9606 GN=DIP2A PE=1 SV=2	2	3	3	1	1571	170.3	8.03	42	95.8	89.2	129.3	90	98.1	97.6	104.767	95.2333	-	1.10011	0.494202
Q9H330	TMEM245	Transmembrane protein 245 OS=Homo sapiens OX=9606 GN=TMEM245 PE=1 SV=3	3	2	2	2	879	97.3	8.91	36	108.3	99.9	106.1	94.1	99.8	91.8	104.767	95.2333	-	1.10011	0.0511396
A0JNW5	UHRF1BP1L	UHRF1-binding protein 1-like OS=Homo sapiens OX=9606 GN=UHRF1BP1L PE=1 SV=2	1	2	2	1	1464	164.1	6.32	20	105.3	102.6	106.4	94.3	95.5	95.9	104.767	95.2333	-	1.10011	0.00147932
P78356	PIP4K2B	Phosphatidylinositol 5-phosphate 4-kinase type-2 beta OS=Homo sapiens OX=9606 GN=PIP4K2B PE=1 SV=1	24	8	8	3	416	47.3	7.33	126	103.7	103.2	107.3	93.7	94.7	97.3	104.733	95.2333	-	1.09975	0.00480827
Q9NX74	DUS2	tRNA-dihydrouridine(20) synthase [NAD(P)+]-like OS=Homo sapiens OX=9606 GN=DUS2 PE=1 SV=1	6	2	3	2	493	55	7.11	120	112.9	97	104.3	101.5	87.6	96.6	104.733	95.2333	-	1.09975	0.196633
P04062	GBA	Lysosomal acid glucosylceramidase OS=Homo sapiens OX=9606 GN=GBA PE=1 SV=3	20	9	10	9	536	59.7	7.61	202	110.7	99.2	104.3	96.2	95.1	94.4	104.733	95.2333	-	1.09975	0.0477886
Q13451	FKBP5	Peptidyl-prolyl cis-trans isomerase FKBP5 OS=Homo sapiens OX=9606 GN=FKBP5 PE=1 SV=2	42	18	22	18	457	51.2	5.9	489	103.4	106.3	104.6	95.2	96	94.6	104.767	95.2667	-	1.09972	0.00052606
P06280	GLA	Alpha-galactosidase A OS=Homo sapiens OX=9606 GN=GLA PE=1 SV=1	3	1	1	1	429	48.7	5.6	0	113	97.3	103.9	96.5	91.2	98.1	104.733	95.2667	-	1.09937	0.131601
Q9P219	CCDC88C	Protein Daple OS=Homo sapiens OX=9606 GN=CCDC88C PE=1 SV=3	0	1	1	1	2028	228.1	6.23	21	112.6	100.7	100.9	95.5	94.4	95.9	104.733	95.2667	-	1.09937	0.0750835
Q99614	TTC1	Tetratricopeptide repeat protein 1 OS=Homo sapiens OX=9606 GN=TTC1 PE=1 SV=1	45	12	18	12	292	33.5	4.84	351	103.5	107.4	103.3	93.4	92.6	99.8	104.733	95.2667	-	1.09937	0.0230607
Q9H4E7	DEF6	Differentially expressed in FDCP 6 homolog OS=Homo sapiens OX=9606 GN=DEF6 PE=1 SV=1	9	4	4	4	631	73.9	6.05	110	107.2	101.8	105.1	95.8	93.5	96.5	104.7	95.2667	-	1.09902	0.00651665
Q8WVT3	TRAPPC12	Trafficking protein particle complex subunit 12 OS=Homo sapiens OX=9606 GN=TRAPPC12 PE=1 SV=3	8	4	5	4	735	79.3	4.91	167	106.6	105.9	101.6	92.2	96.7	96.9	104.7	95.2667	-	1.09902	0.0125787
P62834	RAP1A	Ras-related protein Rap-1A OS=Homo sapiens OX=9606 GN=RAP1A PE=1 SV=1	73	11	25	4	184	21	6.67	662	105.5	105.1	103.5	96.5	94.9	94.4	104.7	95.2667	-	1.09902	0.000429225
O15228	GNPAT	Dihydroxyacetone phosphate acyltransferase OS=Homo sapiens OX=9606 GN=GNPAT PE=1 SV=1	11	5	7	5	680	77.1	6.57	154	104.2	104	105.9	94.3	96.8	94.7	104.7	95.2667	-	1.09902	0.000656598
Q96KA5	CLPTM1L	Cleft lip and palate transmembrane protein 1-like protein OS=Homo sapiens OX=9606 GN=CLPTM1L PE=1 SV=1	20	9	10	9	538	62.2	8.56	210	108	102.1	104.1	97.6	90.6	97.7	104.733	95.3	-	1.09899	0.0319463
P84157	MXRA7	Matrix-remodeling-associated protein 7 OS=Homo sapiens OX=9606 GN=MXRA7 PE=1 SV=1	9	3	3	3	204	21.5	4.26	48	108.6	100.5	105.1	89.6	92.1	104.2	104.733	95.3	-	1.09899	0.136985
Q9NV92	NDFIP2	NEDD4 family-interacting protein 2 OS=Homo sapiens OX=9606 GN=NDFIP2 PE=1 SV=2	10	2	2	2	336	36.4	5.08	63	109.1	98.9	106.2	94.1	92.6	99.2	104.733	95.3	-	1.09899	0.0602598
P28799	GRN	Progranulin OS=Homo sapiens OX=9606 GN=GRN PE=1 SV=2	10	5	7	5	593	63.5	6.83	48	112	100.1	102.1	92.2	96.4	97.3	104.733	95.3	-	1.09899	0.0778321
O00116	AGPS	Alkyldihydroxyacetonephosphate synthase, peroxisomal OS=Homo sapiens OX=9606 GN=AGPS PE=1 SV=1	43	19	28	19	658	72.9	7.34	755	106.3	104.5	103.3	92.7	95.4	97.8	104.7	95.3	-	1.09864	0.00535781
Q15843	NEDD8	NEDD8 OS=Homo sapiens OX=9606 GN=NEDD8 PE=1 SV=1	28	3	11	3	81	9.1	8.43	127	108	103.9	102.2	95.7	97	93.2	104.7	95.3	-	1.09864	0.0101597
P63027	VAMP2	Vesicle-associated membrane protein 2 OS=Homo sapiens OX=9606 GN=VAMP2 PE=1 SV=3	59	5	10	2	116	12.7	8.13	432	113.4	98.4	102.3	96.6	94.7	94.6	104.7	95.3	-	1.09864	0.107182
O15143	ARPC1B	Actin-related protein 2/3 complex subunit 1B OS=Homo sapiens OX=9606 GN=ARPC1B PE=1 SV=3	61	17	29	16	372	40.9	8.35	644	102.8	106	105.3	93.9	98.7	93.3	104.7	95.3	-	1.09864	0.00876007
Q9NRW7	VPS45	Vacuolar protein sorting-associated protein 45 OS=Homo sapiens OX=9606 GN=VPS45 PE=1 SV=1	21	11	16	11	570	65	8.24	263	106.9	105.4	101.8	94.5	96.1	95.3	104.7	95.3	-	1.09864	0.00402531
Q9UJY4	GGA2	ADP-ribosylation factor-binding protein GGA2 OS=Homo sapiens OX=9606 GN=GGA2 PE=1 SV=3	12	4	5	3	613	67.1	6.55	104	103.1	100.9	110.1	101.8	89.1	95	104.7	95.3	-	1.09864	0.110486
Q93063	EXT2	Exostosin-2 OS=Homo sapiens OX=9606 GN=EXT2 PE=1 SV=1	7	5	6	5	718	82.2	6.55	98	100.2	99.2	114.6	94.6	93.2	98.1	104.667	95.3	-	1.09829	0.145083
Q96IJ6	GMPPA	Mannose-1-phosphate guanyltransferase alpha OS=Homo sapiens OX=9606 GN=GMPPA PE=1 SV=1	16	5	6	5	420	46.3	7.21	151	103.7	104.6	105.7	93.1	96.1	96.7	104.667	95.3	-	1.09829	0.00172114
Q9BW60	ELOVL1	Elongation of very long chain fatty acids protein 1 OS=Homo sapiens OX=9606 GN=ELOVL1 PE=1 SV=1	10	2	5	2	279	32.6	9.6	140	101	107.7	105.3	95.9	91	99.1	104.667	95.3333	-	1.0979	0.0381774
Q04206	RELA	Transcription factor p65 OS=Homo sapiens OX=9606 GN=RELA PE=1 SV=2	20	8	9	8	551	60.2	5.68	251	105.9	102.6	105.5	93.9	95.8	96.3	104.667	95.3333	-	1.0979	0.00183136
Q9H6W3	RIOX1	Ribosomal oxygenase 1 OS=Homo sapiens OX=9606 GN=RIOX1 PE=1 SV=2	13	5	5	5	641	71	6.46	111	101.4	96.7	115.9	97.5	91.6	96.9	104.667	95.3333	-	1.0979	0.199242
O43681	ASNA1	ATPase ASNA1 OS=Homo sapiens OX=9606 GN=ASNA1 PE=1 SV=2	53	12	21	12	348	38.8	4.91	401	103.1	105	105.9	97.4	93.7	94.9	104.667	95.3333	-	1.0979	0.00240699
Q12888	TP53BP1	TP53-binding protein 1 OS=Homo sapiens OX=9606 GN=TP53BP1 PE=1 SV=2	11	16	18	16	1972	213.4	4.7	308	107.5	101.7	104.7	96.7	94.3	95	104.633	95.3333	-	1.09755	0.00693403
Q14674	ESPL1	Separin OS=Homo sapiens OX=9606 GN=ESPL1 PE=1 SV=3	2	3	3	3	2120	233	7.55	25	109.2	102.1	102.6	94.4	98	93.6	104.633	95.3333	-	1.09755	0.0249249
Q03405	PLAUR	Urokinase plasminogen activator surface receptor OS=Homo sapiens OX=9606 GN=PLAUR PE=1 SV=1	34	7	9	7	335	37	6.65	265	105.9	105	103	98	91.1	96.9	104.633	95.3333	-	1.09755	0.0156849
P14209	CD99	CD99 antigen OS=Homo sapiens OX=9606 GN=CD99 PE=1 SV=1	11	2	2	2	185	18.8	4.75	73	105.1	106.2	102.7	95.3	91.7	99.1	104.667	95.3667	-	1.09752	0.0172665
Q9UBW8	COPS7A	COP9 signalosome complex subunit 7a OS=Homo sapiens OX=9606 GN=COPS7A PE=1 SV=1	45	9	11	9	275	30.3	8.22	415	101.8	103.2	108.9	90.3	96.5	99.3	104.633	95.3667	-	1.09717	0.0541345
O95782	AP2A1	AP-2 complex subunit alpha-1 OS=Homo sapiens OX=9606 GN=AP2A1 PE=1 SV=3	51	40	60	26	977	107.5	7.03	1182	106.5	104.7	102.7	95.9	96.2	94	104.633	95.3667	-	1.09717	0.00202261
Q96H20	SNF8	Vacuolar-sorting protein SNF8 OS=Homo sapiens OX=9606 GN=SNF8 PE=1 SV=1	21	4	4	4	258	28.8	6.65	105	105.7	105.2	103	101.6	96	88.5	104.633	95.3667	-	1.09717	0.0755292
Q9Y5P6	GMPPB	Mannose-1-phosphate guanyltransferase beta OS=Homo sapiens OX=9606 GN=GMPPB PE=1 SV=2	14	4	6	4	360	39.8	6.61	164	99.3	106.3	108.2	93.4	99	93.7	104.6	95.3667	-	1.09682	0.0472566
Q6NZ67	MZT2B	Mitotic-spindle organizing protein 2B OS=Homo sapiens OX=9606 GN=MZT2B PE=1 SV=1	41	4	5	4	158	16.2	10.15	153	103.4	99.5	110.9	94.6	93.7	97.8	104.6	95.3667	-	1.09682	0.0608703
O95219	SNX4	Sorting nexin-4 OS=Homo sapiens OX=9606 GN=SNX4 PE=1 SV=1	22	9	12	9	450	51.9	5.99	201	106.7	103.1	104	96.2	95.8	94.1	104.6	95.3667	-	1.09682	0.00183862
P61163	ACTR1A	Alpha-centractin OS=Homo sapiens OX=9606 GN=ACTR1A PE=1 SV=1	49	15	35	8	376	42.6	6.64	900	107.7	105.1	101.1	93.1	98.4	94.7	104.633	95.4	-	1.09679	0.0204048
Q13042	CDC16	Cell division cycle protein 16 homolog OS=Homo sapiens OX=9606 GN=CDC16 PE=1 SV=2	27	12	13	12	620	71.6	5.85	198	108.5	101.9	103.4	95.4	92	98.8	104.6	95.4	-	1.09644	0.0303573
Q8NDI1	EHBP1	EH domain-binding protein 1 OS=Homo sapiens OX=9606 GN=EHBP1 PE=1 SV=3	9	10	11	9	1231	139.9	5.35	293	101	102.4	110.4	93.8	94.2	98.2	104.6	95.4	-	1.09644	0.0472063
P82675	MRPS5	28S ribosomal protein S5, mitochondrial OS=Homo sapiens OX=9606 GN=MRPS5 PE=1 SV=2	14	6	7	6	430	48	9.92	119	104.3	103.1	106.4	96.8	92.9	96.5	104.6	95.4	-	1.09644	0.00434369
P28290	ITPRID2	Protein ITPRID2 OS=Homo sapiens OX=9606 GN=ITPRID2 PE=1 SV=3	10	11	11	11	1259	138.3	5.19	248	105.1	101.6	107.1	97.1	95.5	93.6	104.6	95.4	-	1.09644	0.00837368
Q99747	NAPG	Gamma-soluble NSF attachment protein OS=Homo sapiens OX=9606 GN=NAPG PE=1 SV=1	35	11	14	11	312	34.7	5.41	283	106.9	104.3	102.6	95.1	93.7	97.4	104.6	95.4	-	1.09644	0.0050852
Q07617	SPAG1	Sperm-associated antigen 1 OS=Homo sapiens OX=9606 GN=SPAG1 PE=1 SV=3	9	7	10	7	926	103.6	6.86	136	100.7	103.5	109.6	94.8	96	95.4	104.6	95.4	-	1.09644	0.0255489
P46977	STT3A	Dolichyl-diphosphooligosaccharide--protein glycosyltransferase subunit STT3A OS=Homo sapiens OX=9606 GN=STT3A PE=1 SV=2	28	20	25	18	705	80.5	8.07	355	106.3	105.5	101.9	94.8	94.8	96.6	104.567	95.4	-	1.09609	0.00345677
Q8IWZ8	SUGP1	SURP and G-patch domain-containing protein 1 OS=Homo sapiens OX=9606 GN=SUGP1 PE=1 SV=2	4	2	3	2	645	72.4	7.61	60	101.1	98	114.6	93.3	93.4	99.5	104.567	95.4	-	1.09609	0.170472
Q14517	FAT1	Protocadherin Fat 1 OS=Homo sapiens OX=9606 GN=FAT1 PE=1 SV=2	1	2	2	2	4588	506	5	40	105.2	96.7	111.9	85.9	98.9	101.5	104.6	95.4333	-	1.09605	0.232998
Q2M389	WASHC4	WASH complex subunit 4 OS=Homo sapiens OX=9606 GN=WASHC4 PE=1 SV=2	10	11	14	11	1173	136.3	7.44	278	100.1	103.9	109.7	93.3	94.1	98.9	104.567	95.4333	-	1.0957	0.050181
Q96HC4	PDLIM5	PDZ and LIM domain protein 5 OS=Homo sapiens OX=9606 GN=PDLIM5 PE=1 SV=5	47	20	27	20	596	63.9	8.21	646	103.6	105.2	104.9	94.3	93	99	104.567	95.4333	-	1.0957	0.00840528
Q96EA4	SPDL1	Protein Spindly OS=Homo sapiens OX=9606 GN=SPDL1 PE=1 SV=2	2	1	1	1	605	70.1	5.47	18	106	92.8	114.9	96	93.4	96.9	104.567	95.4333	-	1.0957	0.232985
Q9HAN9	NMNAT1	Nicotinamide/nicotinic acid mononucleotide adenylyltransferase 1 OS=Homo sapiens OX=9606 GN=NMNAT1 PE=1 SV=1	19	4	6	4	279	31.9	8.87	170	106.1	104.5	103.1	93	99.3	94	104.567	95.4333	-	1.0957	0.0129362
O60232	ZNRD2	Protein ZNRD2 OS=Homo sapiens OX=9606 GN=ZNRD2 PE=1 SV=1	55	6	8	6	199	21.5	5.24	239	105.7	102.8	105.2	96.7	92.1	97.5	104.567	95.4333	-	1.0957	0.00869699
O95865	DDAH2	N(G),N(G)-dimethylarginine dimethylaminohydrolase 2 OS=Homo sapiens OX=9606 GN=DDAH2 PE=1 SV=1	42	9	16	8	285	29.6	6.01	431	102.9	102.9	107.9	94.5	99.1	92.8	104.567	95.4667	-	1.09532	0.0223551
Q99836	MYD88	Myeloid differentiation primary response protein MyD88 OS=Homo sapiens OX=9606 GN=MYD88 PE=1 SV=1	26	6	7	6	296	33.2	6.15	181	105.2	105.1	103.4	95.4	95.2	95.8	104.567	95.4667	-	1.09532	0.000117676
O95985	TOP3B	DNA topoisomerase 3-beta-1 OS=Homo sapiens OX=9606 GN=TOP3B PE=1 SV=1	3	2	2	2	862	96.6	8.12	53	103.3	102.9	107.3	90.1	97.3	98.9	104.5	95.4333	-	1.09501	0.0410046
P23381	WARS	Tryptophan--tRNA ligase, cytoplasmic OS=Homo sapiens OX=9606 GN=WARS PE=1 SV=2	52	23	37	23	471	53.1	6.23	824	106.8	105.9	100.9	98.3	90.1	98	104.533	95.4667	-	1.09497	0.0494118
Q9BQC6	MRPL57	Ribosomal protein 63, mitochondrial OS=Homo sapiens OX=9606 GN=MRPL57 PE=1 SV=1	20	2	2	2	102	12.3	11.44	31	107	107.2	99.4	96.7	91.7	98	104.533	95.4667	-	1.09497	0.0474427
Q9BZL4	PPP1R12C	Protein phosphatase 1 regulatory subunit 12C OS=Homo sapiens OX=9606 GN=PPP1R12C PE=1 SV=1	7	5	5	5	782	84.8	5.57	67	107.9	102.8	102.9	96	94.6	95.8	104.533	95.4667	-	1.09497	0.0064606
P16520	GNB3	Guanine nucleotide-binding protein G(I)/G(S)/G(T) subunit beta-3 OS=Homo sapiens OX=9606 GN=GNB3 PE=1 SV=1	9	4	9	1	340	37.2	5.67	197	100	112.7	100.9	90.5	100.5	95.4	104.533	95.4667	-	1.09497	0.144447
Q9BZF9	UACA	Uveal autoantigen with coiled-coil domains and ankyrin repeats OS=Homo sapiens OX=9606 GN=UACA PE=1 SV=2	22	32	32	32	1416	162.4	7.03	492	107.8	102.8	103	95.2	97.9	93.3	104.533	95.4667	-	1.09497	0.0126763
Q7Z392	TRAPPC11	Trafficking protein particle complex subunit 11 OS=Homo sapiens OX=9606 GN=TRAPPC11 PE=1 SV=2	10	8	9	8	1133	128.8	7.14	209	104.3	103.4	105.8	97.3	95.6	93.5	104.5	95.4667	-	1.09462	0.0022728
O95070	YIF1A	Protein YIF1A OS=Homo sapiens OX=9606 GN=YIF1A PE=1 SV=2	9	2	3	2	293	32	8.95	111	102.5	106.2	104.9	93.5	94.5	98.5	104.533	95.5	-	1.09459	0.00850343
P13498	CYBA	Cytochrome b-245 light chain OS=Homo sapiens OX=9606 GN=CYBA PE=1 SV=3	16	3	3	3	195	21	9.54	0	102	100.2	111.4	94.2	93.2	99.1	104.533	95.5	-	1.09459	0.0826368
Q92963	RIT1	GTP-binding protein Rit1 OS=Homo sapiens OX=9606 GN=RIT1 PE=1 SV=1	32	5	5	5	219	25.1	9.1	124	91.8	99.1	122.6	93.4	90.8	102.3	104.5	95.5	-	1.09424	0.415715
Q9Y608	LRRFIP2	Leucine-rich repeat flightless-interacting protein 2 OS=Homo sapiens OX=9606 GN=LRRFIP2 PE=1 SV=1	14	8	11	7	721	82.1	6.95	273	101.2	104.7	107.6	93.9	94.7	97.9	104.5	95.5	-	1.09424	0.0153628
Q14789	GOLGB1	Golgin subfamily B member 1 OS=Homo sapiens OX=9606 GN=GOLGB1 PE=1 SV=2	14	33	36	32	3259	375.8	5	670	105.8	102.4	105.3	95.2	96.1	95.2	104.5	95.5	-	1.09424	0.00122171
P40855	PEX19	Peroxisomal biogenesis factor 19 OS=Homo sapiens OX=9606 GN=PEX19 PE=1 SV=1	27	5	7	5	299	32.8	4.34	203	109.1	102.7	101.6	93.5	94.4	98.6	104.467	95.5	-	1.09389	0.033452
P68371	TUBB4B	Tubulin beta-4B chain OS=Homo sapiens OX=9606 GN=TUBB4B PE=1 SV=1	82	26	243	3	445	49.8	4.89	5387	104.3	108.3	100.8	94.8	99.8	91.9	104.467	95.5	-	1.09389	0.0472016
Q7LG56	RRM2B	Ribonucleoside-diphosphate reductase subunit M2 B OS=Homo sapiens OX=9606 GN=RRM2B PE=1 SV=1	19	6	6	5	351	40.7	4.97	96	108	103.5	102	95.8	95.3	95.5	104.5	95.5333	-	1.09386	0.00771854
Q9BRJ2	MRPL45	39S ribosomal protein L45, mitochondrial OS=Homo sapiens OX=9606 GN=MRPL45 PE=1 SV=2	21	5	6	5	306	35.3	9.03	24	103.8	104	105.7	95.6	92.1	98.9	104.5	95.5333	-	1.09386	0.0120051
Q96IX5	ATP5MD	ATP synthase membrane subunit DAPIT, mitochondrial OS=Homo sapiens OX=9606 GN=ATP5MD PE=1 SV=1	26	1	1	1	58	6.5	9.76	75	106.5	107.9	99.1	94.6	94.7	97.3	104.5	95.5333	-	1.09386	0.0353643
Q9BRQ6	CHCHD6	MICOS complex subunit MIC25 OS=Homo sapiens OX=9606 GN=CHCHD6 PE=1 SV=1	4	1	1	1	235	26.4	8.85	26	108.8	103.7	100.9	98.6	96.3	91.7	104.467	95.5333	-	1.09351	0.0439354
Q5W111	SPRYD7	SPRY domain-containing protein 7 OS=Homo sapiens OX=9606 GN=SPRYD7 PE=1 SV=2	31	5	5	5	196	21.7	6.7	109	105.2	99	109.2	93.4	93	100.2	104.467	95.5333	-	1.09351	0.0771999
O95394	PGM3	Phosphoacetylglucosamine mutase OS=Homo sapiens OX=9606 GN=PGM3 PE=1 SV=1	34	18	27	18	542	59.8	6.25	669	104.1	104.7	104.6	95.4	96.1	95.1	104.467	95.5333	-	1.09351	1.39308e-05
Q5VST9	OBSCN	Obscurin OS=Homo sapiens OX=9606 GN=OBSCN PE=1 SV=3	0	1	1	1	7968	867.9	5.99	22	119.9	99.6	93.9	99.3	91.8	95.5	104.467	95.5333	-	1.09351	0.336254
Q6ICB0	DESI1	Desumoylating isopeptidase 1 OS=Homo sapiens OX=9606 GN=DESI1 PE=1 SV=1	5	1	1	1	168	18.3	4.94	39	111	103.2	99.2	103	85.2	98.4	104.467	95.5333	-	1.09351	0.232888
Q8NBJ5	COLGALT1	Procollagen galactosyltransferase 1 OS=Homo sapiens OX=9606 GN=COLGALT1 PE=1 SV=1	32	22	34	22	622	71.6	7.31	467	105.5	106.4	101.5	98.8	96.3	91.5	104.467	95.5333	-	1.09351	0.026981
Q9BZK7	TBL1XR1	F-box-like/WD repeat-containing protein TBL1XR1 OS=Homo sapiens OX=9606 GN=TBL1XR1 PE=1 SV=1	30	12	18	12	514	55.6	5.55	472	102.4	99.4	111.6	91	95.1	100.5	104.467	95.5333	-	1.09351	0.123295
Q9BX68	HINT2	Histidine triad nucleotide-binding protein 2, mitochondrial OS=Homo sapiens OX=9606 GN=HINT2 PE=1 SV=1	46	5	9	5	163	17.2	9.16	362	104.3	106.2	102.9	94.3	97.3	95	104.467	95.5333	-	1.09351	0.00246884
P55795	HNRNPH2	Heterogeneous nuclear ribonucleoprotein H2 OS=Homo sapiens OX=9606 GN=HNRNPH2 PE=1 SV=1	39	14	28	6	449	49.2	6.3	537	106.6	103.9	102.9	95.7	94.5	96.4	104.467	95.5333	-	1.09351	0.0019468
Q9UEY8	ADD3	Gamma-adducin OS=Homo sapiens OX=9606 GN=ADD3 PE=1 SV=1	6	4	4	4	706	79.1	6.32	35	108	101.9	103.5	94.1	95.4	97.1	104.467	95.5333	-	1.09351	0.0115301
Q8WUK0	PTPMT1	Phosphatidylglycerophosphatase and protein-tyrosine phosphatase 1 OS=Homo sapiens OX=9606 GN=PTPMT1 PE=1 SV=1	28	5	6	5	201	22.8	9.77	115	104.2	102.2	107	95.7	93.4	97.6	104.467	95.5667	-	1.09313	0.00853512
Q8IVH8	MAP4K3	Mitogen-activated protein kinase kinase kinase kinase 3 OS=Homo sapiens OX=9606 GN=MAP4K3 PE=1 SV=1	4	3	3	2	894	101.3	7.56	17	103.1	106.7	103.6	102.5	86.6	97.6	104.467	95.5667	-	1.09313	0.139425
Q9H0F7	ARL6	ADP-ribosylation factor-like protein 6 OS=Homo sapiens OX=9606 GN=ARL6 PE=1 SV=1	6	1	1	1	186	21.1	8.54	40	109	100	104.3	96.6	94.9	95.2	104.433	95.5667	-	1.09278	0.0287182
Q5VW38	GPR107	Protein GPR107 OS=Homo sapiens OX=9606 GN=GPR107 PE=1 SV=1	7	3	4	3	600	66.9	7.24	76	102.5	99	111.8	93.9	98	94.8	104.433	95.5667	-	1.09278	0.0918984
Q9Y239	NOD1	Nucleotide-binding oligomerization domain-containing protein 1 OS=Homo sapiens OX=9606 GN=NOD1 PE=1 SV=1	1	1	1	1	953	107.6	7.11	0	114.3	95.8	103.2	96.4	91.3	99	104.433	95.5667	-	1.09278	0.203078
P30084	ECHS1	Enoyl-CoA hydratase, mitochondrial OS=Homo sapiens OX=9606 GN=ECHS1 PE=1 SV=4	54	14	37	14	290	31.4	8.07	1053	104.5	106	102.8	95.4	97.3	94	104.433	95.5667	-	1.09278	0.0026304
P23284	PPIB	Peptidyl-prolyl cis-trans isomerase B OS=Homo sapiens OX=9606 GN=PPIB PE=1 SV=2	58	15	47	15	216	23.7	9.41	692	106.7	104.9	101.7	95.6	97.2	93.9	104.433	95.5667	-	1.09278	0.00707706
Q13444	ADAM15	Disintegrin and metalloproteinase domain-containing protein 15 OS=Homo sapiens OX=9606 GN=ADAM15 PE=1 SV=4	4	3	4	3	863	92.9	6.73	51	106.5	100.4	106.5	101.3	88.1	97.4	104.467	95.6	-	1.09275	0.114833
P48637	GSS	Glutathione synthetase OS=Homo sapiens OX=9606 GN=GSS PE=1 SV=1	62	24	39	24	474	52.4	5.92	1246	103.5	104.8	104.9	95.7	95.9	95.1	104.4	95.5667	-	1.09243	6.57168e-05
P40763	STAT3	Signal transducer and activator of transcription 3 OS=Homo sapiens OX=9606 GN=STAT3 PE=1 SV=2	32	20	36	20	770	88	6.3	849	107.9	102.6	102.7	90.5	92.8	103.4	104.4	95.5667	-	1.09243	0.111595
Q9P000	COMMD9	COMM domain-containing protein 9 OS=Homo sapiens OX=9606 GN=COMMD9 PE=1 SV=2	42	5	5	5	198	21.8	5.88	169	109.3	99.9	104	93.9	96.4	96.4	104.4	95.5667	-	1.09243	0.036076
Q8NBX0	SCCPDH	Saccharopine dehydrogenase-like oxidoreductase OS=Homo sapiens OX=9606 GN=SCCPDH PE=1 SV=1	31	9	12	9	429	47.1	9.14	230	105.2	106.9	101.2	94.3	98.5	94	104.433	95.6	-	1.0924	0.0166148
O95336	PGLS	6-phosphogluconolactonase OS=Homo sapiens OX=9606 GN=PGLS PE=1 SV=2	64	11	24	11	258	27.5	6.05	723	104.6	106.3	102.4	97.1	95.9	93.8	104.433	95.6	-	1.0924	0.00400479
Q9H4A3	WNK1	Serine/threonine-protein kinase WNK1 OS=Homo sapiens OX=9606 GN=WNK1 PE=1 SV=2	9	17	19	17	2382	250.6	6.34	451	103.3	101	108.9	96.1	95.1	95.6	104.4	95.6	-	1.09205	0.020419
Q9UK76	JPT1	Jupiter microtubule associated homolog 1 OS=Homo sapiens OX=9606 GN=JPT1 PE=1 SV=3	51	7	13	7	154	16	5.6	239	105.8	104.1	103.3	93.8	96.2	96.8	104.4	95.6	-	1.09205	0.00170627
Q969X5	ERGIC1	Endoplasmic reticulum-Golgi intermediate compartment protein 1 OS=Homo sapiens OX=9606 GN=ERGIC1 PE=1 SV=1	29	7	11	7	290	32.6	7.06	238	105.6	105.5	102.1	97.6	95.7	93.5	104.4	95.6	-	1.09205	0.00596824
P68032	ACTC1	Actin, alpha cardiac muscle 1 OS=Homo sapiens OX=9606 GN=ACTC1 PE=1 SV=1	33	14	189	1	377	42	5.39	3227	104.3	104.4	104.5	94.5	97.3	95	104.4	95.6	-	1.09205	0.000523674
O94973	AP2A2	AP-2 complex subunit alpha-2 OS=Homo sapiens OX=9606 GN=AP2A2 PE=1 SV=2	43	31	42	17	939	103.9	6.96	1051	103.2	105.9	104	95.3	97.6	93.9	104.367	95.6	-	1.0917	0.00284712
Q6ZMI0	PPP1R21	Protein phosphatase 1 regulatory subunit 21 OS=Homo sapiens OX=9606 GN=PPP1R21 PE=1 SV=1	14	8	9	8	780	88.3	6.84	210	105.3	101.9	105.9	91.8	98.2	96.8	104.367	95.6	-	1.0917	0.0191161
Q99442	SEC62	Translocation protein SEC62 OS=Homo sapiens OX=9606 GN=SEC62 PE=1 SV=1	18	8	9	8	399	45.8	7.12	97	102.1	103.3	107.7	94.2	98	94.6	104.367	95.6	-	1.0917	0.0136655
Q9NUP9	LIN7C	Protein lin-7 homolog C OS=Homo sapiens OX=9606 GN=LIN7C PE=1 SV=1	19	4	5	4	197	21.8	8.43	97	104.7	99.9	108.5	99	91.5	96.3	104.367	95.6	-	1.0917	0.0573931
Q9HCN8	SDF2L1	Stromal cell-derived factor 2-like protein 1 OS=Homo sapiens OX=9606 GN=SDF2L1 PE=1 SV=2	22	4	5	4	221	23.6	7.03	99	103.8	106.2	103.1	97.2	93.2	96.5	104.367	95.6333	-	1.09132	0.00488155
Q5GLZ8	HERC4	Probable E3 ubiquitin-protein ligase HERC4 OS=Homo sapiens OX=9606 GN=HERC4 PE=1 SV=1	21	16	18	16	1057	118.5	6.19	357	108.9	103.4	100.8	99.3	93.8	93.8	104.367	95.6333	-	1.09132	0.0440693
P40939	HADHA	Trifunctional enzyme subunit alpha, mitochondrial OS=Homo sapiens OX=9606 GN=HADHA PE=1 SV=2	57	34	83	34	763	82.9	9.04	1858	108.7	103.1	101.3	95.6	96.7	94.6	104.367	95.6333	-	1.09132	0.0194016
Q9BR61	ACBD6	Acyl-CoA-binding domain-containing protein 6 OS=Homo sapiens OX=9606 GN=ACBD6 PE=1 SV=1	24	6	6	6	282	31.1	5.11	118	107.1	101.1	104.8	96.1	94.4	96.4	104.333	95.6333	-	1.09097	0.00938324
Q9H7F0	ATP13A3	Probable cation-transporting ATPase 13A3 OS=Homo sapiens OX=9606 GN=ATP13A3 PE=1 SV=4	6	6	9	6	1226	138	6.64	157	104.6	105.5	103	94.8	94.3	97.9	104.367	95.6667	-	1.09094	0.00292224
Q8WXW3	PIBF1	Progesterone-induced-blocking factor 1 OS=Homo sapiens OX=9606 GN=PIBF1 PE=1 SV=2	4	3	3	3	757	89.8	6.02	33	110.3	98.4	104.4	93.2	92.2	101.6	104.367	95.6667	-	1.09094	0.128321
Q14126	DSG2	Desmoglein-2 OS=Homo sapiens OX=9606 GN=DSG2 PE=1 SV=2	28	21	28	21	1118	122.2	5.24	720	108.1	102	103	96.1	93.9	97	104.367	95.6667	-	1.09094	0.0143736
O75695	RP2	Protein XRP2 OS=Homo sapiens OX=9606 GN=RP2 PE=1 SV=4	34	12	16	12	350	39.6	5.12	250	104.1	103.6	105.3	92.9	98	96.1	104.333	95.6667	-	1.09059	0.00527356
Q10713	PMPCA	Mitochondrial-processing peptidase subunit alpha OS=Homo sapiens OX=9606 GN=PMPCA PE=1 SV=2	36	16	20	16	525	58.2	6.92	370	103.7	106.4	102.9	95.1	94.1	97.8	104.333	95.6667	-	1.09059	0.0047941
Q9UHQ9	CYB5R1	NADH-cytochrome b5 reductase 1 OS=Homo sapiens OX=9606 GN=CYB5R1 PE=1 SV=1	21	6	7	6	305	34.1	9.38	49	103.6	102.5	106.9	94.9	97	95.1	104.333	95.6667	-	1.09059	0.00426194
Q7Z3D4	LYSMD3	LysM and putative peptidoglycan-binding domain-containing protein 3 OS=Homo sapiens OX=9606 GN=LYSMD3 PE=1 SV=2	11	2	2	2	306	34.5	5.97	67	106.8	101.2	105	93.4	96.6	97	104.333	95.6667	-	1.09059	0.0124342
P05161	ISG15	Ubiquitin-like protein ISG15 OS=Homo sapiens OX=9606 GN=ISG15 PE=1 SV=5	41	6	9	6	165	17.9	7.44	255	104	106.5	102.5	92	93.9	101.1	104.333	95.6667	-	1.09059	0.0449165
Q8IYB5	SMAP1	Stromal membrane-associated protein 1 OS=Homo sapiens OX=9606 GN=SMAP1 PE=1 SV=2	16	6	8	6	467	50.4	8.75	202	105.5	104.5	103	95.7	95.8	95.5	104.333	95.6667	-	1.09059	0.000291062
O15144	ARPC2	Actin-related protein 2/3 complex subunit 2 OS=Homo sapiens OX=9606 GN=ARPC2 PE=1 SV=1	74	21	42	21	300	34.3	7.36	607	104.2	105.4	103.3	94.6	97.2	95.2	104.3	95.6667	-	1.09024	0.00096678
P30043	BLVRB	Flavin reductase (NADPH) OS=Homo sapiens OX=9606 GN=BLVRB PE=1 SV=3	58	8	14	8	206	22.1	7.65	331	108.5	100.8	103.6	97.5	93.4	96.1	104.3	95.6667	-	1.09024	0.0276988
Q8TCE6	DENND10	DENN domain-containing protein 10 OS=Homo sapiens OX=9606 GN=DENND10 PE=1 SV=1	18	5	5	5	357	40.5	6.61	109	107.6	102.6	102.7	95.8	95.2	96	104.3	95.6667	-	1.09024	0.00662046
Q0VDG4	SCRN3	Secernin-3 OS=Homo sapiens OX=9606 GN=SCRN3 PE=1 SV=1	18	6	7	6	424	48.5	5.55	137	106.9	98.1	107.9	94.1	95.5	97.4	104.3	95.6667	-	1.09024	0.0569381
P09960	LTA4H	Leukotriene A-4 hydrolase OS=Homo sapiens OX=9606 GN=LTA4H PE=1 SV=2	49	25	49	25	611	69.2	6.18	1245	106.3	105.1	101.5	95.7	98	93.3	104.3	95.6667	-	1.09024	0.0120633
Q9UHN1	POLG2	DNA polymerase subunit gamma-2, mitochondrial OS=Homo sapiens OX=9606 GN=POLG2 PE=1 SV=1	2	1	1	1	485	54.9	8.35	27	105.7	101.7	105.6	97.2	92.4	97.5	104.333	95.7	-	1.09021	0.0150247
Q06210	GFPT1	Glutamine--fructose-6-phosphate aminotransferase [isomerizing] 1 OS=Homo sapiens OX=9606 GN=GFPT1 PE=1 SV=3	62	35	75	27	699	78.8	7.11	2000	104.7	105.9	102.4	95.6	94.6	96.9	104.333	95.7	-	1.09021	0.00212951
Q9Y3B3	TMED7	Transmembrane emp24 domain-containing protein 7 OS=Homo sapiens OX=9606 GN=TMED7 PE=1 SV=2	49	10	16	10	224	25.2	6.89	397	104.2	106.7	102.1	93.9	97.3	95.9	104.333	95.7	-	1.09021	0.00645157
Q9H4B6	SAV1	Protein salvador homolog 1 OS=Homo sapiens OX=9606 GN=SAV1 PE=1 SV=2	10	2	2	2	383	44.6	9.09	60	111.2	101.9	99.8	99.9	90.4	96.8	104.3	95.7	-	1.08986	0.127485
Q9BRT3	MIEN1	Migration and invasion enhancer 1 OS=Homo sapiens OX=9606 GN=MIEN1 PE=1 SV=1	23	3	3	3	115	12.4	4.37	68	102	99.8	111.1	92.2	96.5	98.4	104.3	95.7	-	1.08986	0.0929922
Q96BW5	PTER	Phosphotriesterase-related protein OS=Homo sapiens OX=9606 GN=PTER PE=1 SV=1	21	6	9	6	349	39	6.52	236	106.1	104.4	102.4	97.3	96.2	93.6	104.3	95.7	-	1.08986	0.00494719
Q9UMX5	NENF	Neudesin OS=Homo sapiens OX=9606 GN=NENF PE=1 SV=1	47	6	8	6	172	18.8	5.69	196	110.7	103.1	99.1	94.9	96.5	95.7	104.3	95.7	-	1.08986	0.0664128
Q8TCF1	ZFAND1	AN1-type zinc finger protein 1 OS=Homo sapiens OX=9606 GN=ZFAND1 PE=1 SV=1	32	7	8	7	268	30.8	7.39	157	107.5	102.3	103.1	96.6	95.1	95.4	104.3	95.7	-	1.08986	0.00689474
Q9UBP9	GULP1	PTB domain-containing engulfment adapter protein 1 OS=Homo sapiens OX=9606 GN=GULP1 PE=1 SV=1	3	1	1	1	304	34.5	7.9	17	104.4	106.3	102.1	92.5	99.6	95	104.267	95.7	-	1.08952	0.0236327
Q08AE8	SPIRE1	Protein spire homolog 1 OS=Homo sapiens OX=9606 GN=SPIRE1 PE=1 SV=3	1	1	1	1	756	85.5	8.62	28	105.1	101.7	106	96.9	91.2	99	104.267	95.7	-	1.08952	0.0327445
Q8IYI6	EXOC8	Exocyst complex component 8 OS=Homo sapiens OX=9606 GN=EXOC8 PE=1 SV=2	25	13	16	13	725	81.7	5.49	429	105.9	103.7	103.3	95.6	96.3	95.3	104.3	95.7333	-	1.08948	0.000572774
Q9H9B4	SFXN1	Sideroflexin-1 OS=Homo sapiens OX=9606 GN=SFXN1 PE=1 SV=4	55	13	30	11	322	35.6	9.07	627	105.1	104.2	103.6	96.2	96.3	94.7	104.3	95.7333	-	1.08948	0.000224061
A6NKF1	SAC3D1	SAC3 domain-containing protein 1 OS=Homo sapiens OX=9606 GN=SAC3D1 PE=1 SV=2	5	1	1	1	404	43.5	8.69	37	114.8	93.2	104.9	96.8	97.2	93.2	104.3	95.7333	-	1.08948	0.249921
Q8IUR0	TRAPPC5	Trafficking protein particle complex subunit 5 OS=Homo sapiens OX=9606 GN=TRAPPC5 PE=1 SV=1	25	3	5	3	188	20.8	9.66	95	107.7	101.4	103.7	93	95.1	99.1	104.267	95.7333	-	1.08914	0.0292582
P14317	HCLS1	Hematopoietic lineage cell-specific protein OS=Homo sapiens OX=9606 GN=HCLS1 PE=1 SV=3	2	1	1	1	486	54	4.81	34	114	100.1	98.7	96.3	100.6	90.3	104.267	95.7333	-	1.08914	0.2103
O43314	PPIP5K2	Inositol hexakisphosphate and diphosphoinositol-pentakisphosphate kinase 2 OS=Homo sapiens OX=9606 GN=PPIP5K2 PE=1 SV=3	11	11	12	9	1243	140.3	8.22	272	101.4	105.3	106.1	93	97	97.2	104.267	95.7333	-	1.08914	0.0128684
P35609	ACTN2	Alpha-actinin-2 OS=Homo sapiens OX=9606 GN=ACTN2 PE=1 SV=1	24	19	63	2	894	103.8	5.45	1517	102.7	106	104.1	101.8	91.8	93.6	104.267	95.7333	-	1.08914	0.0571061
Q9Y5K8	ATP6V1D	V-type proton ATPase subunit D OS=Homo sapiens OX=9606 GN=ATP6V1D PE=1 SV=1	25	5	7	5	247	28.2	9.36	154	107.7	102.7	102.4	92.6	97.7	96.9	104.267	95.7333	-	1.08914	0.0217487
P30085	CMPK1	UMP-CMP kinase OS=Homo sapiens OX=9606 GN=CMPK1 PE=1 SV=3	62	11	19	11	196	22.2	5.57	604	105.6	106.2	100.9	92.9	100.5	93.8	104.233	95.7333	-	1.08879	0.0438537
Q9P2B2	PTGFRN	Prostaglandin F2 receptor negative regulator OS=Homo sapiens OX=9606 GN=PTGFRN PE=1 SV=2	9	7	8	7	879	98.5	6.61	116	104.5	99.3	109	100.2	93.1	94	104.267	95.7667	-	1.08876	0.0766096
P08574	CYC1	Cytochrome c1, heme protein, mitochondrial OS=Homo sapiens OX=9606 GN=CYC1 PE=1 SV=3	24	4	7	4	325	35.4	9	98	105.4	103.6	103.8	96	95.5	95.8	104.267	95.7667	-	1.08876	0.000132981
O95167	NDUFA3	NADH dehydrogenase [ubiquinone] 1 alpha subcomplex subunit 3 OS=Homo sapiens OX=9606 GN=NDUFA3 PE=1 SV=1	8	1	1	1	84	9.3	8.46	33	107.3	106.2	99.3	95.4	96	95.9	104.267	95.7667	-	1.08876	0.0276348
Q14197	MRPL58	Peptidyl-tRNA hydrolase ICT1, mitochondrial OS=Homo sapiens OX=9606 GN=MRPL58 PE=1 SV=1	29	6	7	6	206	23.6	10.07	161	106.9	103.8	102.1	98.6	93	95.7	104.267	95.7667	-	1.08876	0.0165672
O75592	MYCBP2	E3 ubiquitin-protein ligase MYCBP2 OS=Homo sapiens OX=9606 GN=MYCBP2 PE=1 SV=4	5	22	24	22	4678	513.3	7.02	316	106.8	101.4	104.5	97.8	93.9	95.6	104.233	95.7667	-	1.08841	0.0117968
P16070	CD44	CD44 antigen OS=Homo sapiens OX=9606 GN=CD44 PE=1 SV=3	16	11	24	11	742	81.5	5.33	446	105.1	104.1	103.5	98.8	93.2	95.3	104.233	95.7667	-	1.08841	0.00757459
Q96QG7	MTMR9	Myotubularin-related protein 9 OS=Homo sapiens OX=9606 GN=MTMR9 PE=1 SV=1	9	4	5	4	549	63.4	6.39	64	105.7	102.3	104.6	97.6	96.1	93.6	104.2	95.7667	-	1.08806	0.00538276
Q15555	MAPRE2	Microtubule-associated protein RP/EB family member 2 OS=Homo sapiens OX=9606 GN=MAPRE2 PE=1 SV=1	18	4	5	4	327	37	5.57	125	108.5	103.6	100.5	94.6	95.5	97.2	104.2	95.7667	-	1.08806	0.0262548
P49591	SARS	Serine--tRNA ligase, cytoplasmic OS=Homo sapiens OX=9606 GN=SARS PE=1 SV=3	60	31	51	31	514	58.7	6.43	1045	105	105.2	102.5	101.1	92.6	93.7	104.233	95.8	-	1.08803	0.0397584
O96007	MOCS2	Molybdopterin synthase catalytic subunit OS=Homo sapiens OX=9606 GN=MOCS2 PE=1 SV=1	37	6	8	6	188	20.9	5.44	230	106	102.2	104.4	95.8	95.5	96.1	104.2	95.8	-	1.08768	0.0016628
Q13217	DNAJC3	DnaJ homolog subfamily C member 3 OS=Homo sapiens OX=9606 GN=DNAJC3 PE=1 SV=1	47	21	26	21	504	57.5	6.15	550	103.3	105.7	103.6	95.4	96.3	95.7	104.2	95.8	-	1.08768	0.000465135
O95361	TRIM16	Tripartite motif-containing protein 16 OS=Homo sapiens OX=9606 GN=TRIM16 PE=1 SV=3	29	12	15	12	564	63.9	5.49	346	102.1	103.6	106.9	92.2	100.1	95.1	104.2	95.8	-	1.08768	0.0361543
Q9BVM2	DPCD	Protein DPCD OS=Homo sapiens OX=9606 GN=DPCD PE=1 SV=2	10	2	2	2	203	23.2	9.03	30	99.6	99.2	113.8	94.5	93.7	99.2	104.2	95.8	-	1.08768	0.174805
P07738	BPGM	Bisphosphoglycerate mutase OS=Homo sapiens OX=9606 GN=BPGM PE=1 SV=2	6	2	2	2	259	30	6.54	14	103.6	104.6	104.4	95.1	95.5	96.8	104.2	95.8	-	1.08768	0.000148274
Q12882	DPYD	Dihydropyrimidine dehydrogenase [NADP(+)] OS=Homo sapiens OX=9606 GN=DPYD PE=1 SV=2	25	20	24	20	1025	111.3	7.05	458	110.1	98	104.4	93.2	101	93.2	104.167	95.8	-	1.08733	0.127164
P47897	QARS	Glutamine--tRNA ligase OS=Homo sapiens OX=9606 GN=QARS PE=1 SV=1	53	37	56	36	775	87.7	7.15	1215	104.2	105.6	102.7	95.6	96.8	95	104.167	95.8	-	1.08733	0.00107609
Q8NBN3	TMEM87A	Transmembrane protein 87A OS=Homo sapiens OX=9606 GN=TMEM87A PE=1 SV=3	4	3	3	3	555	63.4	6.74	23	98	99.8	114.7	96.9	92.5	98	104.167	95.8	-	1.08733	0.206334
O95208	EPN2	Epsin-2 OS=Homo sapiens OX=9606 GN=EPN2 PE=1 SV=3	9	5	6	5	641	68.4	7.52	104	104.7	103.9	104	94.9	95.5	97.1	104.2	95.8333	-	1.0873	0.000285757
P04843	RPN1	Dolichyl-diphosphooligosaccharide--protein glycosyltransferase subunit 1 OS=Homo sapiens OX=9606 GN=RPN1 PE=1 SV=1	58	32	70	32	607	68.5	6.38	1256	104.3	101.9	106.4	95.2	97.3	95	104.2	95.8333	-	1.0873	0.00498782
Q7Z6J0	SH3RF1	E3 ubiquitin-protein ligase SH3RF1 OS=Homo sapiens OX=9606 GN=SH3RF1 PE=1 SV=2	1	1	1	1	888	93.1	8.54	17	102.5	106.3	103.8	96	96.2	95.3	104.2	95.8333	-	1.0873	0.00188363
Q15653	NFKBIB	NF-kappa-B inhibitor beta OS=Homo sapiens OX=9606 GN=NFKBIB PE=1 SV=2	4	1	1	1	356	37.7	4.84	0	105	104.8	102.8	96.1	96.5	94.9	104.2	95.8333	-	1.0873	0.000600574
Q96I76	GPATCH3	G patch domain-containing protein 3 OS=Homo sapiens OX=9606 GN=GPATCH3 PE=1 SV=1	2	1	1	1	525	59.3	5.01	0	115.5	102.5	94.6	97	86.2	104.3	104.2	95.8333	-	1.0873	0.357217
O14647	CHD2	Chromodomain-helicase-DNA-binding protein 2 OS=Homo sapiens OX=9606 GN=CHD2 PE=1 SV=2	8	13	14	8	1828	211.2	8.1	155	104.6	102.3	105.7	94.9	94.8	97.8	104.2	95.8333	-	1.0873	0.0039805
Q14289	PTK2B	Protein-tyrosine kinase 2-beta OS=Homo sapiens OX=9606 GN=PTK2B PE=1 SV=2	2	2	2	1	1009	115.8	6.25	67	108.8	97.6	106.2	94.5	93.9	99.1	104.2	95.8333	-	1.0873	0.0901987
Q9NR45	NANS	Sialic acid synthase OS=Homo sapiens OX=9606 GN=NANS PE=1 SV=2	43	13	27	13	359	40.3	6.74	577	103.4	106.2	102.9	92.2	97.1	98.2	104.167	95.8333	-	1.08696	0.0168474
Q9UI12	ATP6V1H	V-type proton ATPase subunit H OS=Homo sapiens OX=9606 GN=ATP6V1H PE=1 SV=1	35	11	13	11	483	55.8	6.48	413	103.3	103.7	105.5	95.3	96.4	95.8	104.167	95.8333	-	1.08696	0.000368619
Q4LDG9	DNAL1	Dynein light chain 1, axonemal OS=Homo sapiens OX=9606 GN=DNAL1 PE=1 SV=1	9	2	2	2	190	21.5	6.1	18	100.9	105	106.6	93.8	94.7	99	104.167	95.8333	-	1.08696	0.023422
Q6DKK2	TTC19	Tetratricopeptide repeat protein 19, mitochondrial OS=Homo sapiens OX=9606 GN=TTC19 PE=1 SV=4	11	5	5	5	380	42.4	5.77	48	109.3	103.2	100	101.1	91.2	95.2	104.167	95.8333	-	1.08696	0.103356
Q8N5D0	WDTC1	WD and tetratricopeptide repeats protein 1 OS=Homo sapiens OX=9606 GN=WDTC1 PE=1 SV=2	2	1	1	1	677	75.9	7.27	43	95.3	109.4	107.8	95.1	98.1	94.3	104.167	95.8333	-	1.08696	0.144607
Q9ULE0	WWC3	Protein WWC3 OS=Homo sapiens OX=9606 GN=WWC3 PE=1 SV=3	2	3	3	2	1092	122.6	6.37	17	104.7	101.2	106.6	95	95.4	97.1	104.167	95.8333	-	1.08696	0.00815808
P13861	PRKAR2A	cAMP-dependent protein kinase type II-alpha regulatory subunit OS=Homo sapiens OX=9606 GN=PRKAR2A PE=1 SV=2	57	18	31	18	404	45.5	5.07	835	103.2	105.1	104.2	93.6	97.5	96.4	104.167	95.8333	-	1.08696	0.0029071
Q9BYC8	MRPL32	39S ribosomal protein L32, mitochondrial OS=Homo sapiens OX=9606 GN=MRPL32 PE=1 SV=1	19	2	3	2	188	21.4	9.73	55	103.4	102.2	106.8	97.3	97.5	92.7	104.133	95.8333	-	1.08661	0.0164422
Q16762	TST	Thiosulfate sulfurtransferase OS=Homo sapiens OX=9606 GN=TST PE=1 SV=4	20	5	6	5	297	33.4	7.25	87	111	100.2	101.2	96.1	97.3	94.1	104.133	95.8333	-	1.08661	0.0806776
Q05209	PTPN12	Tyrosine-protein phosphatase non-receptor type 12 OS=Homo sapiens OX=9606 GN=PTPN12 PE=1 SV=3	30	21	26	21	780	88.1	5.62	609	104.9	103.8	103.7	95.6	95	96.9	104.133	95.8333	-	1.08661	0.00025844
Q13951	CBFB	Core-binding factor subunit beta OS=Homo sapiens OX=9606 GN=CBFB PE=1 SV=2	31	5	7	5	182	21.5	6.6	151	102.2	105.5	104.8	93.7	95.6	98.3	104.167	95.8667	-	1.08658	0.00765111
Q9NYP9	MIS18A	Protein Mis18-alpha OS=Homo sapiens OX=9606 GN=MIS18A PE=1 SV=1	4	1	1	1	233	25.8	5.2	60	112.9	96.9	102.7	96.3	85	106.3	104.167	95.8667	-	1.08658	0.3433
P51398	DAP3	28S ribosomal protein S29, mitochondrial OS=Homo sapiens OX=9606 GN=DAP3 PE=1 SV=1	48	17	21	17	398	45.5	8.88	406	107.7	103.9	100.9	97.6	92.1	97.9	104.167	95.8667	-	1.08658	0.0381816
Q9Y6M5	SLC30A1	Zinc transporter 1 OS=Homo sapiens OX=9606 GN=SLC30A1 PE=1 SV=3	15	6	8	6	507	55.3	6.48	97	120.5	93.6	98.4	90.8	88	108.8	104.167	95.8667	-	1.08658	0.475032
Q9UNN8	PROCR	Endothelial protein C receptor OS=Homo sapiens OX=9606 GN=PROCR PE=1 SV=1	16	3	4	3	238	26.7	7.18	107	115.1	97.6	99.7	99.1	91.1	97.4	104.133	95.8667	-	1.08623	0.242258
Q8IYJ2	C10orf67	Uncharacterized protein C10orf67, mitochondrial OS=Homo sapiens OX=9606 GN=C10orf67 PE=1 SV=3	2	1	1	1	551	63.6	8.84	0	116	98.4	98	103.3	86.8	97.5	104.133	95.8667	-	1.08623	0.340853
Q8N3C7	CLIP4	CAP-Gly domain-containing linker protein 4 OS=Homo sapiens OX=9606 GN=CLIP4 PE=1 SV=1	1	1	2	1	705	76.3	8.7	0	97.8	102.2	112.4	96.6	98.7	92.3	104.133	95.8667	-	1.08623	0.154527
Q5T653	MRPL2	39S ribosomal protein L2, mitochondrial OS=Homo sapiens OX=9606 GN=MRPL2 PE=1 SV=2	18	4	5	4	305	33.3	11.3	83	105.7	101.9	104.8	97	94.8	95.8	104.133	95.8667	-	1.08623	0.00323442
Q8TD19	NEK9	Serine/threonine-protein kinase Nek9 OS=Homo sapiens OX=9606 GN=NEK9 PE=1 SV=2	10	9	10	9	979	107.1	5.74	138	103.3	102.9	106.2	96.6	96.5	94.5	104.133	95.8667	-	1.08623	0.00266649
Q6ZNJ1	NBEAL2	Neurobeachin-like protein 2 OS=Homo sapiens OX=9606 GN=NBEAL2 PE=1 SV=2	1	1	1	1	2754	302.3	6.38	38	108.8	99.1	104.5	96	98.7	92.9	104.133	95.8667	-	1.08623	0.0647131
Q9Y2I7	PIKFYVE	1-phosphatidylinositol 3-phosphate 5-kinase OS=Homo sapiens OX=9606 GN=PIKFYVE PE=1 SV=3	1	2	2	2	2098	237	6.7	50	109.4	102.9	100.1	97.1	93.7	96.8	104.133	95.8667	-	1.08623	0.04923
P51636	CAV2	Caveolin-2 OS=Homo sapiens OX=9606 GN=CAV2 PE=1 SV=2	33	4	5	4	162	18.3	5.27	153	107	98.7	106.7	94.4	98.1	95.1	104.133	95.8667	-	1.08623	0.0484841
Q86SQ0	PHLDB2	Pleckstrin homology-like domain family B member 2 OS=Homo sapiens OX=9606 GN=PHLDB2 PE=1 SV=2	12	15	18	15	1253	142.1	7.43	270	106	101.1	105.2	93.2	93.7	100.7	104.1	95.8667	-	1.08588	0.0449471
Q8WV99	ZFAND2B	AN1-type zinc finger protein 2B OS=Homo sapiens OX=9606 GN=ZFAND2B PE=1 SV=1	6	2	3	2	257	28	6.92	27	110.5	101	100.8	99.1	92.7	95.8	104.1	95.8667	-	1.08588	0.0898253
Q96A73	KIAA1191	Putative monooxygenase p33MONOX OS=Homo sapiens OX=9606 GN=KIAA1191 PE=1 SV=1	7	2	2	2	305	33.2	9.39	21	103.8	93.6	114.9	89.5	97	101.1	104.1	95.8667	-	1.08588	0.306296
Q13153	PAK1	Serine/threonine-protein kinase PAK 1 OS=Homo sapiens OX=9606 GN=PAK1 PE=1 SV=2	24	11	18	5	545	60.6	5.76	355	107.6	101.2	103.5	95.3	95.6	96.8	104.1	95.9	-	1.08551	0.0131024
P38936	CDKN1A	Cyclin-dependent kinase inhibitor 1 OS=Homo sapiens OX=9606 GN=CDKN1A PE=1 SV=3	7	1	1	1	164	18.1	8.37	26	107.8	99.5	105	96.2	94	97.5	104.1	95.9	-	1.08551	0.0361417
Q9Y6A4	CFAP20	Cilia- and flagella-associated protein 20 OS=Homo sapiens OX=9606 GN=CFAP20 PE=1 SV=1	43	6	8	6	193	22.8	9.76	157	103.4	104.6	104.3	93.9	95.6	98.2	104.1	95.9	-	1.08551	0.00324168
Q9NYY8	FASTKD2	FAST kinase domain-containing protein 2, mitochondrial OS=Homo sapiens OX=9606 GN=FASTKD2 PE=1 SV=1	1	1	1	1	710	81.4	8.05	26	112.5	100.5	99.3	98.5	85.8	103.4	104.1	95.9	-	1.08551	0.289874
Q7Z434	MAVS	Mitochondrial antiviral-signaling protein OS=Homo sapiens OX=9606 GN=MAVS PE=1 SV=2	27	9	13	9	540	56.5	5.52	375	106.7	102.3	103.3	95.2	99.1	93.4	104.1	95.9	-	1.08551	0.018748
O75608	LYPLA1	Acyl-protein thioesterase 1 OS=Homo sapiens OX=9606 GN=LYPLA1 PE=1 SV=1	28	5	7	5	230	24.7	6.77	99	106.5	106.3	99.5	99.4	95.9	92.4	104.1	95.9	-	1.08551	0.055351
Q13409	DYNC1I2	Cytoplasmic dynein 1 intermediate chain 2 OS=Homo sapiens OX=9606 GN=DYNC1I2 PE=1 SV=3	41	18	29	18	638	71.4	5.2	1200	103.6	104.6	104.1	98.5	97.6	91.6	104.1	95.9	-	1.08551	0.0198916
Q96S52	PIGS	GPI transamidase component PIG-S OS=Homo sapiens OX=9606 GN=PIGS PE=1 SV=3	22	9	10	9	555	61.6	6.49	261	107.7	103.1	101.5	97.3	97.5	92.9	104.1	95.9	-	1.08551	0.0264726
Q96IU4	ABHD14B	Protein ABHD14B OS=Homo sapiens OX=9606 GN=ABHD14B PE=1 SV=1	33	5	7	5	210	22.3	6.4	168	104.8	103.9	103.6	96.8	95.9	95	104.1	95.9	-	1.08551	0.000204167
Q9NUE0	ZDHHC18	Palmitoyltransferase ZDHHC18 OS=Homo sapiens OX=9606 GN=ZDHHC18 PE=1 SV=2	3	1	1	1	388	42	9.04	29	104.7	103.5	104.1	97	92.8	97.9	104.1	95.9	-	1.08551	0.00700584
Q9UJY5	GGA1	ADP-ribosylation factor-binding protein GGA1 OS=Homo sapiens OX=9606 GN=GGA1 PE=1 SV=1	21	11	15	10	639	70.3	5.29	369	105.5	103.6	103.1	95.4	96.6	95.7	104.067	95.9	-	1.08516	0.000557932
P43897	TSFM	Elongation factor Ts, mitochondrial OS=Homo sapiens OX=9606 GN=TSFM PE=1 SV=2	31	8	10	8	325	35.4	8.38	198	103.2	99.2	109.8	97.9	91.8	98	104.067	95.9	-	1.08516	0.0924432
P49419	ALDH7A1	Alpha-aminoadipic semialdehyde dehydrogenase OS=Homo sapiens OX=9606 GN=ALDH7A1 PE=1 SV=5	50	23	43	23	539	58.5	7.99	1126	104	104.8	103.4	94.5	99.8	93.4	104.067	95.9	-	1.08516	0.0154863
P16989	YBX3	Y-box-binding protein 3 OS=Homo sapiens OX=9606 GN=YBX3 PE=1 SV=4	40	9	23	6	372	40.1	9.77	728	108.7	99.1	104.5	98.3	89.6	99.9	104.1	95.9333	-	1.08513	0.126253
P21912	SDHB	Succinate dehydrogenase [ubiquinone] iron-sulfur subunit, mitochondrial OS=Homo sapiens OX=9606 GN=SDHB PE=1 SV=3	44	11	16	11	280	31.6	8.76	137	108.7	102.8	100.8	94.3	99.2	94.3	104.1	95.9333	-	1.08513	0.0470479
Q9H977	WDR54	WD repeat-containing protein 54 OS=Homo sapiens OX=9606 GN=WDR54 PE=1 SV=1	17	4	5	4	334	35.9	6.2	121	108.2	102.4	101.7	98.2	92.2	97.4	104.1	95.9333	-	1.08513	0.0429129
Q4U2R6	MRPL51	39S ribosomal protein L51, mitochondrial OS=Homo sapiens OX=9606 GN=MRPL51 PE=1 SV=1	13	1	1	1	128	15.1	11.27	63	104.6	101	106.7	96.5	89	102.3	104.1	95.9333	-	1.08513	0.123361
Q96CD2	PPCDC	Phosphopantothenoylcysteine decarboxylase OS=Homo sapiens OX=9606 GN=PPCDC PE=1 SV=2	33	4	7	4	204	22.4	6.1	139	108.9	99.6	103.8	98.4	93.5	95.9	104.1	95.9333	-	1.08513	0.0547756
O00754	MAN2B1	Lysosomal alpha-mannosidase OS=Homo sapiens OX=9606 GN=MAN2B1 PE=1 SV=3	4	3	4	3	1011	113.7	7.28	89	111.9	99.1	101.3	96.2	93.7	97.9	104.1	95.9333	-	1.08513	0.119505
Q16773	KYAT1	Kynurenine--oxoglutarate transaminase 1 OS=Homo sapiens OX=9606 GN=KYAT1 PE=1 SV=1	7	3	3	2	422	47.8	6.47	71	102.9	106.7	102.6	93.9	98.9	95	104.067	95.9333	-	1.08478	0.0155349
Q9BXV9	GON7	EKC/KEOPS complex subunit GON7 OS=Homo sapiens OX=9606 GN=GON7 PE=1 SV=2	57	3	3	3	100	10.9	4.27	95	103.1	98.9	110.2	103.3	92.9	91.6	104.067	95.9333	-	1.08478	0.176259
Q9Y5L4	TIMM13	Mitochondrial import inner membrane translocase subunit Tim13 OS=Homo sapiens OX=9606 GN=TIMM13 PE=1 SV=1	51	4	6	4	95	10.5	8.18	115	109	99.8	103.4	97.4	92.7	97.7	104.067	95.9333	-	1.08478	0.0600472
P55084	HADHB	Trifunctional enzyme subunit beta, mitochondrial OS=Homo sapiens OX=9606 GN=HADHB PE=1 SV=3	44	21	34	21	474	51.3	9.41	783	104	103.7	104.5	96.8	97	94	104.067	95.9333	-	1.08478	0.00122481
O95084	PRSS23	Serine protease 23 OS=Homo sapiens OX=9606 GN=PRSS23 PE=1 SV=1	20	5	5	5	383	43	9.42	74	106.7	101.7	103.7	98.3	93.9	95.6	104.033	95.9333	-	1.08443	0.0139005
Q9BZQ6	EDEM3	ER degradation-enhancing alpha-mannosidase-like protein 3 OS=Homo sapiens OX=9606 GN=EDEM3 PE=1 SV=2	8	5	5	5	932	104.6	4.93	113	100.3	99.2	112.6	95.2	94.6	98	104.033	95.9333	-	1.08443	0.140876
P14625	HSP90B1	Endoplasmin OS=Homo sapiens OX=9606 GN=HSP90B1 PE=1 SV=1	60	49	191	47	803	92.4	4.84	4569	105.7	104.8	101.7	96.6	97.6	93.7	104.067	95.9667	-	1.0844	0.00858387
P05120	SERPINB2	Plasminogen activator inhibitor 2 OS=Homo sapiens OX=9606 GN=SERPINB2 PE=1 SV=2	63	23	76	23	415	46.6	5.63	2477	108.9	102.8	100.5	103.5	90.1	94.3	104.067	95.9667	-	1.0844	0.158807
Q15599	SLC9A3R2	Na(+)/H(+) exchange regulatory cofactor NHE-RF2 OS=Homo sapiens OX=9606 GN=SLC9A3R2 PE=1 SV=2	40	12	13	12	337	37.4	7.93	158	104.9	102.5	104.8	96	94.4	97.5	104.067	95.9667	-	1.0844	0.00243245
Q9UK99	FBXO3	F-box only protein 3 OS=Homo sapiens OX=9606 GN=FBXO3 PE=1 SV=3	6	2	2	2	471	54.5	5	34	112.6	98.1	101.5	97.6	92.3	98	104.067	95.9667	-	1.0844	0.163198
Q9Y5Z4	HEBP2	Heme-binding protein 2 OS=Homo sapiens OX=9606 GN=HEBP2 PE=1 SV=1	28	5	5	5	205	22.9	4.63	30	106.1	104.8	101.3	97.3	96.2	94.4	104.067	95.9667	-	1.0844	0.00823279
Q13287	NMI	N-myc-interactor OS=Homo sapiens OX=9606 GN=NMI PE=1 SV=2	39	8	8	8	307	35	5.34	196	106.5	103.2	102.5	98.8	96.1	93	104.067	95.9667	-	1.0844	0.0176441
Q9NWV8	BABAM1	BRISC and BRCA1-A complex member 1 OS=Homo sapiens OX=9606 GN=BABAM1 PE=1 SV=1	25	6	9	6	329	36.5	4.64	241	105.8	103.3	103.1	96.7	95	96.2	104.067	95.9667	-	1.0844	0.00128422
Q15057	ACAP2	Arf-GAP with coiled-coil, ANK repeat and PH domain-containing protein 2 OS=Homo sapiens OX=9606 GN=ACAP2 PE=1 SV=3	12	8	9	8	778	88	6.8	233	106.4	103.3	102.3	97.1	94.3	96.4	104	95.9333	-	1.08409	0.00569033
Q12955	ANK3	Ankyrin-3 OS=Homo sapiens OX=9606 GN=ANK3 PE=1 SV=3	0	1	1	1	4377	480.1	6.49	0	101.2	96.4	114.5	100.6	93.5	93.8	104.033	95.9667	-	1.08406	0.242623
Q8WVK7	SKA2	Spindle and kinetochore-associated protein 2 OS=Homo sapiens OX=9606 GN=SKA2 PE=1 SV=1	9	1	1	1	121	14.2	7.33	33	104.9	99.2	108	95.8	91.7	100.4	104.033	95.9667	-	1.08406	0.0885114
P22352	GPX3	Glutathione peroxidase 3 OS=Homo sapiens OX=9606 GN=GPX3 PE=1 SV=2	5	1	1	1	226	25.5	8.13	25	103.4	103.8	104.9	93.8	98.3	95.8	104.033	95.9667	-	1.08406	0.00423531
P62256	UBE2H	Ubiquitin-conjugating enzyme E2 H OS=Homo sapiens OX=9606 GN=UBE2H PE=1 SV=1	35	6	9	6	183	20.6	4.67	136	111.5	98.4	102.2	98.6	89.7	99.6	104.033	95.9667	-	1.08406	0.182261
Q8IVP5	FUNDC1	FUN14 domain-containing protein 1 OS=Homo sapiens OX=9606 GN=FUNDC1 PE=1 SV=1	11	1	1	1	155	17.2	8.62	52	102.2	104.6	105.3	99.5	92.4	96	104.033	95.9667	-	1.08406	0.0232045
Q9UPZ3	HPS5	Hermansky-Pudlak syndrome 5 protein OS=Homo sapiens OX=9606 GN=HPS5 PE=1 SV=2	2	2	2	2	1129	127.4	5.54	31	108.9	96.8	106.4	97.8	90.8	99.3	104.033	95.9667	-	1.08406	0.149115
Q6P1M3	LLGL2	LLGL scribble cell polarity complex component 2 OS=Homo sapiens OX=9606 GN=LLGL2 PE=1 SV=2	6	5	5	5	1020	113.4	7.52	63	103.6	104.2	104.3	94.1	96.7	97.1	104.033	95.9667	-	1.08406	0.0011221
Q9Y625	GPC6	Glypican-6 OS=Homo sapiens OX=9606 GN=GPC6 PE=1 SV=1	6	2	2	2	555	62.7	5.41	24	95.7	100.5	115.9	99.4	95.7	92.8	104.033	95.9667	-	1.08406	0.275093
P61923	COPZ1	Coatomer subunit zeta-1 OS=Homo sapiens OX=9606 GN=COPZ1 PE=1 SV=1	33	4	15	4	177	20.2	4.81	508	106.6	105.5	99.9	93.5	96.9	97.5	104	95.9667	-	1.08371	0.0293754
P35080	PFN2	Profilin-2 OS=Homo sapiens OX=9606 GN=PFN2 PE=1 SV=3	58	5	6	5	140	15	6.99	156	106.4	101.5	104.1	98	95.2	94.7	104	95.9667	-	1.08371	0.0100762
O75368	SH3BGRL	SH3 domain-binding glutamic acid-rich-like protein OS=Homo sapiens OX=9606 GN=SH3BGRL PE=1 SV=1	67	5	7	5	114	12.8	5.25	210	107.5	103.4	101.1	93.3	101.5	93.1	104	95.9667	-	1.08371	0.0739867
Q9UMR5	PPT2	Lysosomal thioesterase PPT2 OS=Homo sapiens OX=9606 GN=PPT2 PE=1 SV=4	4	1	1	1	302	34.2	6.33	28	107	98.7	106.4	96.5	100.5	91	104.033	96	-	1.08368	0.104415
Q96JH7	VCPIP1	Deubiquitinating protein VCIP135 OS=Homo sapiens OX=9606 GN=VCPIP1 PE=1 SV=2	7	6	7	6	1222	134.2	7.2	159	108.9	99.2	104	96.5	94.5	97	104.033	96	-	1.08368	0.0504477
Q8WUA7	TBC1D22A	TBC1 domain family member 22A OS=Homo sapiens OX=9606 GN=TBC1D22A PE=1 SV=2	6	3	4	2	517	59.1	5.97	68	98.8	96.8	116.5	99.6	83.5	104.9	104.033	96	-	1.08368	0.421445
P35222	CTNNB1	Catenin beta-1 OS=Homo sapiens OX=9606 GN=CTNNB1 PE=1 SV=1	25	17	22	13	781	85.4	5.86	485	102.8	102.9	106.4	96.9	96.3	94.8	104.033	96	-	1.08368	0.00387654
Q96DZ1	ERLEC1	Endoplasmic reticulum lectin 1 OS=Homo sapiens OX=9606 GN=ERLEC1 PE=1 SV=1	22	8	9	7	483	54.8	6.28	153	103.7	101.7	106.6	96.7	93.4	97.9	104	96	-	1.08333	0.0150239
O14734	ACOT8	Acyl-coenzyme A thioesterase 8 OS=Homo sapiens OX=9606 GN=ACOT8 PE=1 SV=1	31	7	8	7	319	35.9	7.56	126	105.8	102	104.2	95.9	98.3	93.8	104	96	-	1.08333	0.00934255
P52756	RBM5	RNA-binding protein 5 OS=Homo sapiens OX=9606 GN=RBM5 PE=1 SV=2	6	5	6	3	815	92.1	6.28	134	108.5	98	105.5	94.7	88	105.3	104	96	-	1.08333	0.248333
Q6IAN0	DHRS7B	Dehydrogenase/reductase SDR family member 7B OS=Homo sapiens OX=9606 GN=DHRS7B PE=1 SV=2	20	6	7	6	325	35.1	9.55	190	106.5	105.4	100.1	96.5	94.8	96.7	104	96	-	1.08333	0.0179479
Q8N3R9	MPP5	MAGUK p55 subfamily member 5 OS=Homo sapiens OX=9606 GN=MPP5 PE=1 SV=3	23	13	14	13	675	77.2	6.14	224	108	100.8	103.2	96.7	95.2	96.1	104	96	-	1.08333	0.0207997
Q6PML9	SLC30A9	Zinc transporter 9 OS=Homo sapiens OX=9606 GN=SLC30A9 PE=1 SV=1	2	1	1	1	568	63.5	8.32	30	103.4	97.9	110.7	97.2	99.2	91.6	104	96	-	1.08333	0.139701
Q9P2T1	GMPR2	GMP reductase 2 OS=Homo sapiens OX=9606 GN=GMPR2 PE=1 SV=1	28	9	11	7	348	37.9	7.23	199	102.3	102.6	107.1	96.9	94.9	96.2	104	96	-	1.08333	0.00851521
Q7Z4H7	HAUS6	HAUS augmin-like complex subunit 6 OS=Homo sapiens OX=9606 GN=HAUS6 PE=1 SV=2	5	4	4	4	955	108.6	6.47	53	104.4	101.5	106.2	94.2	93.2	100.7	104.033	96.0333	-	1.0833	0.0423715
P49755	TMED10	Transmembrane emp24 domain-containing protein 10 OS=Homo sapiens OX=9606 GN=TMED10 PE=1 SV=2	45	10	24	10	219	25	7.44	577	104.9	104.7	102.3	95.7	98.2	94.1	103.967	96	-	1.08299	0.00543394
Q8NB15	ZNF511	Zinc finger protein 511 OS=Homo sapiens OX=9606 GN=ZNF511 PE=1 SV=2	11	2	2	2	252	28.2	7.66	30	102.3	100.3	109.3	97.4	93.6	97	103.967	96	-	1.08299	0.0557615
Q9UBS4	DNAJB11	DnaJ homolog subfamily B member 11 OS=Homo sapiens OX=9606 GN=DNAJB11 PE=1 SV=1	38	14	19	14	358	40.5	6.18	451	106	105.3	100.7	96.8	94.8	96.5	104	96.0333	-	1.08296	0.0109233
P62070	RRAS2	Ras-related protein R-Ras2 OS=Homo sapiens OX=9606 GN=RRAS2 PE=1 SV=1	51	10	15	8	204	23.4	6.01	319	102.2	106.5	103.3	94.3	96.2	97.6	104	96.0333	-	1.08296	0.00769533
P07686	HEXB	Beta-hexosaminidase subunit beta OS=Homo sapiens OX=9606 GN=HEXB PE=1 SV=3	23	11	16	10	556	63.1	6.76	281	112.7	100.4	98.8	99.3	97.6	91.2	103.967	96.0333	-	1.08261	0.19031
Q14596	NBR1	Next to BRCA1 gene 1 protein OS=Homo sapiens OX=9606 GN=NBR1 PE=1 SV=3	3	2	2	2	966	107.3	5.12	78	98.2	96.4	117.3	96.7	90.5	100.9	103.967	96.0333	-	1.08261	0.340437
Q9UP38	FZD1	Frizzled-1 OS=Homo sapiens OX=9606 GN=FZD1 PE=1 SV=2	1	1	1	1	647	71.1	7.99	28	112	95.6	104.2	100.3	95.3	92.5	103.933	96.0333	-	1.08226	0.20732
Q5JTJ3	COA6	Cytochrome c oxidase assembly factor 6 homolog OS=Homo sapiens OX=9606 GN=COA6 PE=1 SV=1	34	4	5	4	125	14.1	8.25	140	109.8	99.6	102.4	98.7	93	96.4	103.933	96.0333	-	1.08226	0.0847268
Q16774	GUK1	Guanylate kinase OS=Homo sapiens OX=9606 GN=GUK1 PE=1 SV=2	38	5	6	5	197	21.7	6.55	193	102.8	105.9	103.2	93	99.4	95.8	103.967	96.0667	-	1.08223	0.0195158
Q9H3K2	GHITM	Growth hormone-inducible transmembrane protein OS=Homo sapiens OX=9606 GN=GHITM PE=1 SV=2	19	5	6	5	345	37.2	9.94	103	105.4	105.6	100.9	99.4	91.1	97.7	103.967	96.0667	-	1.08223	0.0558743
Q15084	PDIA6	Protein disulfide-isomerase A6 OS=Homo sapiens OX=9606 GN=PDIA6 PE=1 SV=1	43	17	45	17	440	48.1	5.08	1248	103.8	105.3	102.8	96	97.5	94.7	103.967	96.0667	-	1.08223	0.00190587
Q9NZV5	SELENON	Selenoprotein N OS=Homo sapiens OX=9606 GN=SELENON PE=1 SV=5	3	2	2	2	590	65.8	5.48	0	106.7	104.2	100.9	91.3	101.4	95.5	103.933	96.0667	-	1.08189	0.0802804
P08133	ANXA6	Annexin A6 OS=Homo sapiens OX=9606 GN=ANXA6 PE=1 SV=3	72	48	125	48	673	75.8	5.6	2867	104.6	105.9	101.3	94.3	100.4	93.5	103.933	96.0667	-	1.08189	0.0377707
Q15436	SEC23A	Protein transport protein Sec23A OS=Homo sapiens OX=9606 GN=SEC23A PE=1 SV=2	35	19	41	18	765	86.1	7.08	1348	103.2	102.9	105.7	96.6	95.7	95.9	103.933	96.0667	-	1.08189	0.00106396
Q9BWS9	CHID1	Chitinase domain-containing protein 1 OS=Homo sapiens OX=9606 GN=CHID1 PE=1 SV=1	14	5	6	5	393	44.9	8.63	170	110	104	97.8	98.7	100.7	88.8	103.933	96.0667	-	1.08189	0.197329
Q8N3P4	VPS8	Vacuolar protein sorting-associated protein 8 homolog OS=Homo sapiens OX=9606 GN=VPS8 PE=1 SV=3	6	9	9	9	1428	161.7	5.64	88	100.4	107.1	104.3	96	91.1	101.1	103.933	96.0667	-	1.08189	0.0866155
Q6Y288	B3GLCT	Beta-1,3-glucosyltransferase OS=Homo sapiens OX=9606 GN=B3GLCT PE=1 SV=2	4	1	1	1	498	56.5	7.5	53	98.1	109.7	104	94.7	94.6	98.9	103.933	96.0667	-	1.08189	0.0965198
Q8N5L8	RPP25L	Ribonuclease P protein subunit p25-like protein OS=Homo sapiens OX=9606 GN=RPP25L PE=1 SV=1	20	2	3	2	163	17.6	10.3	55	98	102.9	110.9	102.4	88.3	97.5	103.933	96.0667	-	1.08189	0.231895
Q86X76	NIT1	Deaminated glutathione amidase OS=Homo sapiens OX=9606 GN=NIT1 PE=1 SV=2	16	5	5	5	327	35.9	7.74	54	107.2	102.1	102.5	93.9	99.2	95.1	103.933	96.0667	-	1.08189	0.0264997
Q9UNE7	STUB1	E3 ubiquitin-protein ligase CHIP OS=Homo sapiens OX=9606 GN=STUB1 PE=1 SV=2	43	11	16	11	303	34.8	5.87	271	103.5	103.8	104.5	96.7	96	95.5	103.933	96.0667	-	1.08189	6.68511e-05
Q86V21	AACS	Acetoacetyl-CoA synthetase OS=Homo sapiens OX=9606 GN=AACS PE=1 SV=1	13	9	10	9	672	75.1	6.24	186	106.4	102.2	103.1	95.3	96.8	96.1	103.9	96.0667	-	1.08154	0.00436715
P11169	SLC2A3	Solute carrier family 2, facilitated glucose transporter member 3 OS=Homo sapiens OX=9606 GN=SLC2A3 PE=1 SV=1	14	7	9	7	496	53.9	7.2	158	106.7	101.5	103.5	98.4	97.6	92.2	103.9	96.0667	-	1.08154	0.0336743
P00167	CYB5A	Cytochrome b5 OS=Homo sapiens OX=9606 GN=CYB5A PE=1 SV=2	43	4	6	4	134	15.3	4.96	149	106.5	101.9	103.3	93.3	95	99.9	103.9	96.0667	-	1.08154	0.0310314
Q9BTX7	TTPAL	Alpha-tocopherol transfer protein-like OS=Homo sapiens OX=9606 GN=TTPAL PE=1 SV=2	13	2	2	2	342	38.5	6.44	82	100.7	102.2	108.9	93.5	97.6	97.2	103.933	96.1	-	1.08151	0.0508729
O15031	PLXNB2	Plexin-B2 OS=Homo sapiens OX=9606 GN=PLXNB2 PE=1 SV=3	17	23	27	23	1838	205	6.24	605	111	101.2	99.5	96.9	96.3	95.1	103.9	96.1	-	1.08117	0.097637
Q8IUR7	ARMC8	Armadillo repeat-containing protein 8 OS=Homo sapiens OX=9606 GN=ARMC8 PE=1 SV=2	13	6	7	6	673	75.5	6.73	249	105.5	104	102.2	97.2	94.2	96.9	103.9	96.1	-	1.08117	0.00444542
Q96DT5	DNAH11	Dynein heavy chain 11, axonemal OS=Homo sapiens OX=9606 GN=DNAH11 PE=1 SV=4	0	1	1	1	4516	520	6.44	0	112.1	101.8	97.8	102.4	85.6	100.3	103.9	96.1	-	1.08117	0.314541
Q96SZ6	CDK5RAP1	CDK5 regulatory subunit-associated protein 1 OS=Homo sapiens OX=9606 GN=CDK5RAP1 PE=1 SV=2	2	1	1	1	601	67.6	8.21	38	110.4	91	110.3	89.9	96.5	101.9	103.9	96.1	-	1.08117	0.346906
O00170	AIP	AH receptor-interacting protein OS=Homo sapiens OX=9606 GN=AIP PE=1 SV=2	50	14	17	14	330	37.6	6.29	412	103.3	104.4	104	96.5	96.1	95.7	103.9	96.1	-	1.08117	3.91117e-05
O15382	BCAT2	Branched-chain-amino-acid aminotransferase, mitochondrial OS=Homo sapiens OX=9606 GN=BCAT2 PE=1 SV=2	21	7	11	7	392	44.3	8.65	219	106.5	105.2	100.1	97.9	98.7	91.8	103.933	96.1333	-	1.08114	0.05606
Q14790	CASP8	Caspase-8 OS=Homo sapiens OX=9606 GN=CASP8 PE=1 SV=1	43	14	20	14	479	55.4	5.1	668	112.8	101.1	97.7	102.4	91	94.9	103.867	96.1	-	1.08082	0.242342
O94886	TMEM63A	CSC1-like protein 1 OS=Homo sapiens OX=9606 GN=TMEM63A PE=1 SV=3	1	1	1	1	807	92.1	7.27	36	112.3	97.5	101.9	103.8	90.9	93.7	103.9	96.1333	-	1.08079	0.2572
Q9H0U3	MAGT1	Magnesium transporter protein 1 OS=Homo sapiens OX=9606 GN=MAGT1 PE=1 SV=1	17	6	8	5	335	38	9.63	158	108.3	101.2	102.1	97.7	94.7	96	103.867	96.1333	-	1.08044	0.0320034
P19367	HK1	Hexokinase-1 OS=Homo sapiens OX=9606 GN=HK1 PE=1 SV=3	51	44	78	38	917	102.4	6.8	2161	103.9	105.2	102.5	97.5	97.3	93.6	103.867	96.1333	-	1.08044	0.00653641
Q96MW1	CCDC43	Coiled-coil domain-containing protein 43 OS=Homo sapiens OX=9606 GN=CCDC43 PE=1 SV=2	28	4	5	4	224	25.2	4.92	180	97.6	107.2	106.8	89.3	96	103.1	103.867	96.1333	-	1.08044	0.201878
Q9NY33	DPP3	Dipeptidyl peptidase 3 OS=Homo sapiens OX=9606 GN=DPP3 PE=1 SV=2	63	32	55	32	737	82.5	5.1	1752	105.4	104.4	101.8	95.2	99.7	93.5	103.867	96.1333	-	1.08044	0.0224243
Q9Y490	TLN1	Talin-1 OS=Homo sapiens OX=9606 GN=TLN1 PE=1 SV=3	75	146	335	130	2541	269.6	6.07	9795	103.4	104.5	103.7	96.2	97.8	94.4	103.867	96.1333	-	1.08044	0.0017181
Q8IW50	FAM219A	Protein FAM219A OS=Homo sapiens OX=9606 GN=FAM219A PE=1 SV=3	9	1	1	1	185	20.4	4.73	31	108.2	96.3	107.1	94	102.7	91.7	103.867	96.1333	-	1.08044	0.201382
Q13586	STIM1	Stromal interaction molecule 1 OS=Homo sapiens OX=9606 GN=STIM1 PE=1 SV=3	17	10	13	9	685	77.4	6.67	210	105.6	101.5	104.5	96	96.3	96.1	103.867	96.1333	-	1.08044	0.00325286
Q96BJ3	AIDA	Axin interactor, dorsalization-associated protein OS=Homo sapiens OX=9606 GN=AIDA PE=1 SV=1	29	8	8	8	306	35	6.55	69	107.5	100.4	103.6	98.5	93.8	96.1	103.833	96.1333	-	1.0801	0.0352172
Q8N766	EMC1	ER membrane protein complex subunit 1 OS=Homo sapiens OX=9606 GN=EMC1 PE=1 SV=1	28	23	29	23	993	111.7	7.66	502	103.3	102.4	105.8	95.7	96.8	95.9	103.833	96.1333	-	1.0801	0.00198895
Q9UH92	MLX	Max-like protein X OS=Homo sapiens OX=9606 GN=MLX PE=1 SV=2	3	1	1	1	298	33.3	8.06	23	116.2	94.5	100.9	93.9	92.5	102.1	103.867	96.1667	-	1.08007	0.339115
P55211	CASP9	Caspase-9 OS=Homo sapiens OX=9606 GN=CASP9 PE=1 SV=3	3	1	1	1	416	46.3	6.05	13	110.1	94.6	106.8	93.2	96.7	98.6	103.833	96.1667	-	1.07972	0.197952
Q96HR9	REEP6	Receptor expression-enhancing protein 6 OS=Homo sapiens OX=9606 GN=REEP6 PE=1 SV=2	10	2	3	2	211	23.4	8.56	109	89.3	107.9	114.3	105.5	99.8	83.2	103.833	96.1667	-	1.07972	0.487971
Q9UHV7	MED13	Mediator of RNA polymerase II transcription subunit 13 OS=Homo sapiens OX=9606 GN=MED13 PE=1 SV=3	0	1	1	1	2174	239.1	5.64	0	103.5	100.2	107.8	95	96	97.5	103.833	96.1667	-	1.07972	0.0296891
P20618	PSMB1	Proteasome subunit beta type-1 OS=Homo sapiens OX=9606 GN=PSMB1 PE=1 SV=2	43	9	19	9	241	26.5	8.13	452	103.8	104.8	102.9	96	96	96.5	103.833	96.1667	-	1.07972	0.000181048
Q9UNS2	COPS3	COP9 signalosome complex subunit 3 OS=Homo sapiens OX=9606 GN=COPS3 PE=1 SV=3	30	10	13	10	423	47.8	6.65	398	104	103.1	104.4	93	95.5	100	103.833	96.1667	-	1.07972	0.0212193
O00203	AP3B1	AP-3 complex subunit beta-1 OS=Homo sapiens OX=9606 GN=AP3B1 PE=1 SV=3	40	38	49	38	1094	121.2	6.04	953	104	105	102.5	93.1	97.7	97.7	103.833	96.1667	-	1.07972	0.0106706
Q86YR5	GPSM1	G-protein-signaling modulator 1 OS=Homo sapiens OX=9606 GN=GPSM1 PE=1 SV=2	5	3	3	2	675	74.5	6.54	30	107	99.7	104.7	98.8	91.7	98	103.8	96.1667	-	1.07938	0.070227
Q13561	DCTN2	Dynactin subunit 2 OS=Homo sapiens OX=9606 GN=DCTN2 PE=1 SV=4	69	20	33	20	401	44.2	5.21	913	107.3	103	101.2	96.2	97.6	94.8	103.833	96.2	-	1.07935	0.0182777
P49720	PSMB3	Proteasome subunit beta type-3 OS=Homo sapiens OX=9606 GN=PSMB3 PE=1 SV=2	50	10	21	10	205	22.9	6.55	448	105.2	103.4	102.9	95.2	96.1	97.3	103.833	96.2	-	1.07935	0.0011819
Q9NWM8	FKBP14	Peptidyl-prolyl cis-trans isomerase FKBP14 OS=Homo sapiens OX=9606 GN=FKBP14 PE=1 SV=1	9	2	2	2	211	24.2	6.07	29	100.9	103.8	106.8	93.7	96.3	98.6	103.833	96.2	-	1.07935	0.0261301
Q16134	ETFDH	Electron transfer flavoprotein-ubiquinone oxidoreductase, mitochondrial OS=Homo sapiens OX=9606 GN=ETFDH PE=1 SV=2	17	9	10	9	617	68.5	7.55	175	107.4	102.3	101.8	97.5	98.2	92.9	103.833	96.2	-	1.07935	0.035336
P48454	PPP3CC	Serine/threonine-protein phosphatase 2B catalytic subunit gamma isoform OS=Homo sapiens OX=9606 GN=PPP3CC PE=1 SV=3	10	5	6	2	512	58.1	6.98	76	99.8	103.5	108.2	93.9	96.9	97.8	103.833	96.2	-	1.07935	0.0475543
O15118	NPC1	NPC intracellular cholesterol transporter 1 OS=Homo sapiens OX=9606 GN=NPC1 PE=1 SV=2	10	11	14	11	1278	142.1	5.36	239	107	102.4	102	96.1	94.1	98.4	103.8	96.2	-	1.079	0.0200205
P0C221	CCDC175	Coiled-coil domain-containing protein 175 OS=Homo sapiens OX=9606 GN=CCDC175 PE=4 SV=2	1	1	2	1	793	93.6	6.71	31	113.5	98.5	99.4	96.8	93.2	98.6	103.8	96.2	-	1.079	0.211135
Q16877	PFKFB4	6-phosphofructo-2-kinase/fructose-2,6-bisphosphatase 4 OS=Homo sapiens OX=9606 GN=PFKFB4 PE=2 SV=6	11	5	5	3	469	54	6.62	65	112.3	98.7	100.4	89.1	99.4	100.1	103.8	96.2	-	1.079	0.243649
Q3ZCW2	LGALSL	Galectin-related protein OS=Homo sapiens OX=9606 GN=LGALSL PE=1 SV=2	17	2	3	2	172	19	5.35	110	108.8	104.3	98.3	102.7	97.4	88.5	103.8	96.2	-	1.079	0.213283
Q5TAQ9	DCAF8	DDB1- and CUL4-associated factor 8 OS=Homo sapiens OX=9606 GN=DCAF8 PE=1 SV=1	12	6	6	6	597	66.8	5.39	174	106.5	103.2	101.7	95.2	96.9	96.5	103.8	96.2	-	1.079	0.00727901
Q15172	PPP2R5A	Serine/threonine-protein phosphatase 2A 56 kDa regulatory subunit alpha isoform OS=Homo sapiens OX=9606 GN=PPP2R5A PE=1 SV=1	7	3	4	3	486	56.2	6.71	80	98	100.2	113.2	104.3	91.8	92.5	103.8	96.2	-	1.079	0.290167
Q6ZRP7	QSOX2	Sulfhydryl oxidase 2 OS=Homo sapiens OX=9606 GN=QSOX2 PE=1 SV=3	20	11	13	11	698	77.5	7.72	218	108.4	100.3	102.7	94.7	96.1	97.8	103.8	96.2	-	1.079	0.0413779
P52630	STAT2	Signal transducer and activator of transcription 2 OS=Homo sapiens OX=9606 GN=STAT2 PE=1 SV=1	3	2	2	2	851	97.9	5.49	30	116.9	91.9	102.6	99.4	92.6	96.6	103.8	96.2	-	1.079	0.368545
P41227	NAA10	N-alpha-acetyltransferase 10 OS=Homo sapiens OX=9606 GN=NAA10 PE=1 SV=1	43	9	10	9	235	26.4	5.64	247	102.1	104.4	104.8	95	97.1	96.5	103.767	96.2	-	1.07866	0.00194981
O60921	HUS1	Checkpoint protein HUS1 OS=Homo sapiens OX=9606 GN=HUS1 PE=1 SV=1	14	3	3	3	280	31.7	6.84	43	95.5	96.8	119	94.9	95.5	98.2	103.767	96.2	-	1.07866	0.381017
Q9BST9	RTKN	Rhotekin OS=Homo sapiens OX=9606 GN=RTKN PE=1 SV=2	14	8	9	8	563	62.6	7.44	83	101.8	108.2	101.3	97	95.3	96.3	103.767	96.2	-	1.07866	0.0292331
Q9NYV4	CDK12	Cyclin-dependent kinase 12 OS=Homo sapiens OX=9606 GN=CDK12 PE=1 SV=2	2	2	2	2	1490	164.1	9.44	76	106	103.6	101.8	95.7	96.5	96.5	103.8	96.2333	-	1.07863	0.0037084
Q5SW96	LDLRAP1	Low density lipoprotein receptor adapter protein 1 OS=Homo sapiens OX=9606 GN=LDLRAP1 PE=1 SV=3	22	6	9	6	308	33.9	6.7	260	109.8	101.1	100.4	97.1	94.8	96.8	103.767	96.2333	-	1.07828	0.0724858
Q3ZAQ7	VMA21	Vacuolar ATPase assembly integral membrane protein VMA21 OS=Homo sapiens OX=9606 GN=VMA21 PE=1 SV=1	22	2	2	2	101	11.3	7.24	50	102.1	101.4	107.8	97.9	94	96.8	103.767	96.2333	-	1.07828	0.032119
Q96BM9	ARL8A	ADP-ribosylation factor-like protein 8A OS=Homo sapiens OX=9606 GN=ARL8A PE=1 SV=1	40	6	9	1	186	21.4	7.77	171	100.3	100.3	110.7	96.1	95.3	97.3	103.767	96.2333	-	1.07828	0.098736
Q9BSH5	HDHD3	Haloacid dehalogenase-like hydrolase domain-containing protein 3 OS=Homo sapiens OX=9606 GN=HDHD3 PE=1 SV=1	9	2	2	2	251	28	6.71	27	102.7	100.9	107.7	96.2	96	96.5	103.767	96.2333	-	1.07828	0.0209449
Q7L523	RRAGA	Ras-related GTP-binding protein A OS=Homo sapiens OX=9606 GN=RRAGA PE=1 SV=1	18	4	5	4	313	36.5	7.72	193	102.6	101.5	107.2	93.9	99.8	95	103.767	96.2333	-	1.07828	0.0401595
Q92734	TFG	Protein TFG OS=Homo sapiens OX=9606 GN=TFG PE=1 SV=2	43	14	28	14	400	43.4	5.1	619	107	100.5	103.8	94.5	94.8	99.4	103.767	96.2333	-	1.07828	0.0374241
Q5T0Z8	C6orf132	Uncharacterized protein C6orf132 OS=Homo sapiens OX=9606 GN=C6orf132 PE=1 SV=4	1	1	1	1	1188	124	9.45	38	103.9	99.8	107.6	95.6	97.7	95.4	103.767	96.2333	-	1.07828	0.0335672
P68402	PAFAH1B2	Platelet-activating factor acetylhydrolase IB subunit beta OS=Homo sapiens OX=9606 GN=PAFAH1B2 PE=1 SV=1	39	6	8	6	229	25.6	5.92	52	104.4	105.5	101.4	93.1	100.7	94.9	103.767	96.2333	-	1.07828	0.044221
Q9BUB5	MKNK1	MAP kinase-interacting serine/threonine-protein kinase 1 OS=Homo sapiens OX=9606 GN=MKNK1 PE=1 SV=1	3	1	1	1	465	51.3	6.68	43	101	104.6	105.7	94.6	94.2	99.9	103.767	96.2333	-	1.07828	0.0315193
Q6RW13	AGTRAP	Type-1 angiotensin II receptor-associated protein OS=Homo sapiens OX=9606 GN=AGTRAP PE=1 SV=1	19	2	2	2	159	17.4	6.14	73	102.9	103.5	104.8	98	92.1	98.6	103.733	96.2333	-	1.07794	0.0251002
O60234	GMFG	Glia maturation factor gamma OS=Homo sapiens OX=9606 GN=GMFG PE=1 SV=1	51	6	14	5	142	16.8	5.26	359	107.1	102.4	101.8	94.7	101.2	92.9	103.767	96.2667	-	1.07791	0.0683745
Q9H0A8	COMMD4	COMM domain-containing protein 4 OS=Homo sapiens OX=9606 GN=COMMD4 PE=1 SV=1	29	5	8	5	199	21.8	7.31	160	105.8	103	102.5	95.6	95.2	98	103.767	96.2667	-	1.07791	0.00511978
O60664	PLIN3	Perilipin-3 OS=Homo sapiens OX=9606 GN=PLIN3 PE=1 SV=3	71	22	51	22	434	47	5.44	1547	105.3	103.4	102.6	96.6	98.1	94.1	103.767	96.2667	-	1.07791	0.00608571
Q5T5C0	STXBP5	Syntaxin-binding protein 5 OS=Homo sapiens OX=9606 GN=STXBP5 PE=1 SV=1	6	5	5	5	1151	127.5	7.28	99	110.4	98.7	102.1	97.6	98.8	92.4	103.733	96.2667	-	1.07756	0.134732
Q05682	CALD1	Caldesmon OS=Homo sapiens OX=9606 GN=CALD1 PE=1 SV=3	23	19	27	19	793	93.2	5.66	527	103.2	104.8	103.2	97.8	96.4	94.6	103.733	96.2667	-	1.07756	0.0022082
O75319	DUSP11	RNA/RNP complex-1-interacting phosphatase OS=Homo sapiens OX=9606 GN=DUSP11 PE=1 SV=2	4	1	1	1	377	43.7	9.29	35	110.6	96.7	103.9	99.4	96.7	92.7	103.733	96.2667	-	1.07756	0.169449
P42574	CASP3	Caspase-3 OS=Homo sapiens OX=9606 GN=CASP3 PE=1 SV=2	22	4	4	4	277	31.6	6.54	137	101.2	100.8	109.2	97.3	94.6	96.9	103.733	96.2667	-	1.07756	0.0595005
Q5MNZ6	WDR45B	WD repeat domain phosphoinositide-interacting protein 3 OS=Homo sapiens OX=9606 GN=WDR45B PE=1 SV=2	21	6	8	5	344	38.1	7.59	162	104.9	103.8	102.5	94.4	95.5	98.9	103.733	96.2667	-	1.07756	0.00800475
P53992	SEC24C	Protein transport protein Sec24C OS=Homo sapiens OX=9606 GN=SEC24C PE=1 SV=3	34	29	54	28	1094	118.2	7.06	1220	105	103	103.2	94.9	95.7	98.2	103.733	96.2667	-	1.07756	0.00319161
Q99627	COPS8	COP9 signalosome complex subunit 8 OS=Homo sapiens OX=9606 GN=COPS8 PE=1 SV=1	30	4	6	4	209	23.2	5.38	124	101.4	104.8	105	94.5	97.8	96.5	103.733	96.2667	-	1.07756	0.00782288
Q99643	SDHC	Succinate dehydrogenase cytochrome b560 subunit, mitochondrial OS=Homo sapiens OX=9606 GN=SDHC PE=1 SV=1	5	1	1	1	169	18.6	9.69	22	111.3	101.8	98.1	97.4	98.2	93.2	103.733	96.2667	-	1.07756	0.151997
Q9HB19	PLEKHA2	Pleckstrin homology domain-containing family A member 2 OS=Homo sapiens OX=9606 GN=PLEKHA2 PE=1 SV=2	8	3	3	3	425	47.2	8.66	46	106.7	101.3	103.1	93.1	99.6	96.1	103.7	96.2667	-	1.07722	0.039062
Q6NYC8	PPP1R18	Phostensin OS=Homo sapiens OX=9606 GN=PPP1R18 PE=1 SV=1	31	14	17	14	613	67.9	5.4	242	103.8	102.9	104.4	97.9	95.8	95.1	103.7	96.2667	-	1.07722	0.00142599
P13671	C6	Complement component C6 OS=Homo sapiens OX=9606 GN=C6 PE=1 SV=3	2	1	1	1	934	104.7	6.76	0	112.6	101.7	96.8	102.2	90.6	96	103.7	96.2667	-	1.07722	0.265541
Q14204	DYNC1H1	Cytoplasmic dynein 1 heavy chain 1 OS=Homo sapiens OX=9606 GN=DYNC1H1 PE=1 SV=5	57	239	463	239	4646	532.1	6.4	10749	103.6	104.7	102.8	97.3	97.8	93.7	103.7	96.2667	-	1.07722	0.0061097
Q9NVE5	USP40	Ubiquitin carboxyl-terminal hydrolase 40 OS=Homo sapiens OX=9606 GN=USP40 PE=1 SV=3	3	2	2	2	1235	140	5.67	30	106.1	100.1	104.9	94.2	101.8	92.8	103.7	96.2667	-	1.07722	0.0902764
Q9BZQ8	NIBAN1	Protein Niban 1 OS=Homo sapiens OX=9606 GN=NIBAN1 PE=1 SV=1	30	22	30	22	928	103.1	4.78	604	103.2	104.1	103.8	99.6	93.5	95.7	103.7	96.2667	-	1.07722	0.0145819
Q6P587	FAHD1	Acylpyruvase FAHD1, mitochondrial OS=Homo sapiens OX=9606 GN=FAHD1 PE=1 SV=2	17	3	3	3	224	24.8	7.39	83	102	107.5	101.6	87.9	99	101.9	103.7	96.2667	-	1.07722	0.186786
Q96HE9	PRR11	Proline-rich protein 11 OS=Homo sapiens OX=9606 GN=PRR11 PE=1 SV=1	8	3	3	3	360	40.1	10.11	31	104.7	101.6	104.8	96.7	94.3	97.8	103.7	96.2667	-	1.07722	0.00725762
O43815	STRN	Striatin OS=Homo sapiens OX=9606 GN=STRN PE=1 SV=4	23	14	18	13	780	86.1	5.27	361	102.2	102.6	106.4	95.1	98.9	94.9	103.733	96.3	-	1.07719	0.0163718
Q13884	SNTB1	Beta-1-syntrophin OS=Homo sapiens OX=9606 GN=SNTB1 PE=1 SV=3	12	5	7	4	538	58	8.63	146	102.6	105.5	103.1	98	94.6	96.3	103.733	96.3	-	1.07719	0.005005
P49789	FHIT	Bis(5'-adenosyl)-triphosphatase OS=Homo sapiens OX=9606 GN=FHIT PE=1 SV=3	12	2	2	2	147	16.8	7.08	23	104.9	100.6	105.7	99.3	91.3	98.3	103.733	96.3	-	1.07719	0.0667706
Q96QD8	SLC38A2	Sodium-coupled neutral amino acid transporter 2 OS=Homo sapiens OX=9606 GN=SLC38A2 PE=1 SV=2	12	3	3	3	506	56	8	150	111	96.7	103.4	100.8	87.6	100.5	103.7	96.3	-	1.07684	0.284934
Q5JPE7	NOMO2	Nodal modulator 2 OS=Homo sapiens OX=9606 GN=NOMO2 PE=1 SV=1	33	27	35	1	1267	139.4	5.76	885	103.4	106.1	101.6	97.7	99.1	92.1	103.7	96.3	-	1.07684	0.0418802
P51159	RAB27A	Ras-related protein Rab-27A OS=Homo sapiens OX=9606 GN=RAB27A PE=1 SV=3	24	5	5	5	221	24.9	5.22	111	102.9	103.3	104.9	93.3	100.6	95	103.7	96.3	-	1.07684	0.0318626
Q96A57	TMEM230	Transmembrane protein 230 OS=Homo sapiens OX=9606 GN=TMEM230 PE=1 SV=1	27	3	4	3	120	13.2	9.31	114	95.4	100.4	115.3	99.1	93.9	95.9	103.7	96.3	-	1.07684	0.29629
O00399	DCTN6	Dynactin subunit 6 OS=Homo sapiens OX=9606 GN=DCTN6 PE=1 SV=1	24	4	4	4	190	20.7	6.32	19	105.9	102.3	102.9	98.5	96.2	94.2	103.7	96.3	-	1.07684	0.0113729
P22681	CBL	E3 ubiquitin-protein ligase CBL OS=Homo sapiens OX=9606 GN=CBL PE=1 SV=2	17	11	12	11	906	99.6	6.54	395	104.2	104.8	102.1	95.8	95.1	98	103.7	96.3	-	1.07684	0.00348093
Q6R327	RICTOR	Rapamycin-insensitive companion of mTOR OS=Homo sapiens OX=9606 GN=RICTOR PE=1 SV=1	6	10	11	10	1708	192.1	7.47	272	106.5	100.3	104.3	99.9	91.8	97.2	103.7	96.3	-	1.07684	0.0688206
Q9H1C7	CYSTM1	Cysteine-rich and transmembrane domain-containing protein 1 OS=Homo sapiens OX=9606 GN=CYSTM1 PE=1 SV=1	10	1	1	1	97	10.6	4.32	50	109.9	99.4	101.8	98.8	90.1	100	103.7	96.3	-	1.07684	0.17181
P56589	PEX3	Peroxisomal biogenesis factor 3 OS=Homo sapiens OX=9606 GN=PEX3 PE=1 SV=1	14	4	5	4	373	42.1	8.15	108	106.2	103.7	101.1	95.5	95.1	98.3	103.667	96.3	-	1.0765	0.0144904
O75113	N4BP1	NEDD4-binding protein 1 OS=Homo sapiens OX=9606 GN=N4BP1 PE=1 SV=4	11	8	8	8	896	100.3	5.36	101	107.2	102.1	101.7	97.6	95.3	96	103.667	96.3	-	1.0765	0.0177843
P68366	TUBA4A	Tubulin alpha-4A chain OS=Homo sapiens OX=9606 GN=TUBA4A PE=1 SV=1	58	22	261	5	448	49.9	5.06	7737	104.4	104.7	101.9	96.7	98.2	94	103.667	96.3	-	1.0765	0.00828058
Q9NRX2	MRPL17	39S ribosomal protein L17, mitochondrial OS=Homo sapiens OX=9606 GN=MRPL17 PE=1 SV=1	29	6	6	6	175	20	10.11	54	105.8	103.3	102	100.9	93.5	94.6	103.7	96.3333	-	1.07647	0.0451634
P07384	CAPN1	Calpain-1 catalytic subunit OS=Homo sapiens OX=9606 GN=CAPN1 PE=1 SV=1	59	34	59	34	714	81.8	5.67	1321	104.7	106.3	99.9	94	101.9	93	103.633	96.3	-	1.07615	0.0978515
Q8IYW5	RNF168	E3 ubiquitin-protein ligase RNF168 OS=Homo sapiens OX=9606 GN=RNF168 PE=1 SV=1	2	1	1	1	571	65	7.96	0	103.8	87.6	119.6	105.5	81.6	101.9	103.667	96.3333	-	1.07612	0.569865
Q12765	SCRN1	Secernin-1 OS=Homo sapiens OX=9606 GN=SCRN1 PE=1 SV=2	41	16	23	16	414	46.4	4.75	658	108.4	102.4	100.2	96.6	97.7	94.7	103.667	96.3333	-	1.07612	0.0479271
O15511	ARPC5	Actin-related protein 2/3 complex subunit 5 OS=Homo sapiens OX=9606 GN=ARPC5 PE=1 SV=3	39	5	13	4	151	16.3	5.67	355	102.4	104.6	104	93.8	99.5	95.7	103.667	96.3333	-	1.07612	0.0151634
P24386	CHM	Rab proteins geranylgeranyltransferase component A 1 OS=Homo sapiens OX=9606 GN=CHM PE=1 SV=3	5	4	4	3	653	73.4	4.75	37	100.7	103.3	107	96.1	95.3	97.6	103.667	96.3333	-	1.07612	0.0197044
Q7Z3K3	POGZ	Pogo transposable element with ZNF domain OS=Homo sapiens OX=9606 GN=POGZ PE=1 SV=2	11	10	11	10	1410	155.2	7.4	290	105.7	101.7	103.6	95.6	94.4	99	103.667	96.3333	-	1.07612	0.0151112
Q96II8	LRCH3	DISP complex protein LRCH3 OS=Homo sapiens OX=9606 GN=LRCH3 PE=1 SV=2	11	6	6	5	777	86	6.71	109	106.4	99.9	104.6	96.8	98.3	93.9	103.633	96.3333	-	1.07578	0.0350168
Q8WXB1	METTL21A	Protein N-lysine methyltransferase METTL21A OS=Homo sapiens OX=9606 GN=METTL21A PE=1 SV=2	7	1	1	1	218	24.6	6.27	53	94.9	106.1	109.9	99.2	93.2	96.6	103.633	96.3333	-	1.07578	0.204906
O75439	PMPCB	Mitochondrial-processing peptidase subunit beta OS=Homo sapiens OX=9606 GN=PMPCB PE=1 SV=2	32	14	19	13	489	54.3	6.83	620	104.5	103.1	103.3	97.8	94.4	96.8	103.633	96.3333	-	1.07578	0.00267085
O75935	DCTN3	Dynactin subunit 3 OS=Homo sapiens OX=9606 GN=DCTN3 PE=1 SV=1	55	9	11	9	186	21.1	5.47	225	105.7	104.8	100.4	95.1	99.9	94	103.633	96.3333	-	1.07578	0.0403525
Q96JI7	SPG11	Spatacsin OS=Homo sapiens OX=9606 GN=SPG11 PE=1 SV=3	0	1	1	1	2443	278.7	5.97	63	106.7	102.3	102	96.1	93.6	99.4	103.667	96.3667	-	1.07575	0.0321771
Q9H1H9	KIF13A	Kinesin-like protein KIF13A OS=Homo sapiens OX=9606 GN=KIF13A PE=1 SV=2	3	5	5	3	1805	202.2	5.6	47	102.8	103.7	104.5	95.8	97.8	95.5	103.667	96.3667	-	1.07575	0.00111868
Q99714	HSD17B10	3-hydroxyacyl-CoA dehydrogenase type-2 OS=Homo sapiens OX=9606 GN=HSD17B10 PE=1 SV=3	73	12	24	12	261	26.9	7.78	900	103.6	103	104.4	97.2	97.6	94.3	103.667	96.3667	-	1.07575	0.0028234
O95248	SBF1	Myotubularin-related protein 5 OS=Homo sapiens OX=9606 GN=SBF1 PE=1 SV=4	8	11	13	10	1868	208.3	6.9	229	107.7	101.3	102	95.3	98.7	95.1	103.667	96.3667	-	1.07575	0.0355053
O00186	STXBP3	Syntaxin-binding protein 3 OS=Homo sapiens OX=9606 GN=STXBP3 PE=1 SV=2	23	14	20	14	592	67.7	7.8	312	105	103.1	102.9	96.4	96.5	96.2	103.667	96.3667	-	1.07575	0.000414561
P52565	ARHGDIA	Rho GDP-dissociation inhibitor 1 OS=Homo sapiens OX=9606 GN=ARHGDIA PE=1 SV=3	81	12	36	12	204	23.2	5.11	573	103.4	103.3	104.2	96.4	98	94.7	103.633	96.3667	-	1.07541	0.00186526
P62491	RAB11A	Ras-related protein Rab-11A OS=Homo sapiens OX=9606 GN=RAB11A PE=1 SV=3	52	10	20	1	216	24.4	6.57	373	102.1	101.9	106.9	96	95	98.1	103.633	96.3667	-	1.07541	0.0178244
Q5D862	FLG2	Filaggrin-2 OS=Homo sapiens OX=9606 GN=FLG2 PE=1 SV=1	1	1	1	1	2391	247.9	8.31	0	103.6	109.9	97.4	99.2	97.9	92	103.633	96.3667	-	1.07541	0.161273
Q9H2M9	RAB3GAP2	Rab3 GTPase-activating protein non-catalytic subunit OS=Homo sapiens OX=9606 GN=RAB3GAP2 PE=1 SV=1	26	32	41	31	1393	155.9	5.62	792	105.7	101.6	103.6	98.2	94.5	96.4	103.633	96.3667	-	1.07541	0.0103583
Q2PZI1	DPY19L1	Probable C-mannosyltransferase DPY19L1 OS=Homo sapiens OX=9606 GN=DPY19L1 PE=2 SV=1	5	3	3	3	675	77.3	8.95	33	103.8	105.4	101.7	92	99.4	97.7	103.633	96.3667	-	1.07541	0.0428617
Q8N6S5	ARL6IP6	ADP-ribosylation factor-like protein 6-interacting protein 6 OS=Homo sapiens OX=9606 GN=ARL6IP6 PE=1 SV=1	5	1	1	1	226	24.7	6.33	40	105.3	101.3	104.3	95.3	98.8	95	103.633	96.3667	-	1.07541	0.0132252
Q9NP97	DYNLRB1	Dynein light chain roadblock-type 1 OS=Homo sapiens OX=9606 GN=DYNLRB1 PE=1 SV=3	51	3	10	3	96	10.9	7.25	329	95.5	94.4	121	95.9	101.4	91.8	103.633	96.3667	-	1.07541	0.470346
Q9H173	SIL1	Nucleotide exchange factor SIL1 OS=Homo sapiens OX=9606 GN=SIL1 PE=1 SV=1	11	5	6	5	461	52.1	5.36	200	97.5	106.1	107.2	100.9	93.2	95	103.6	96.3667	-	1.07506	0.133357
O95340	PAPSS2	Bifunctional 3'-phosphoadenosine 5'-phosphosulfate synthase 2 OS=Homo sapiens OX=9606 GN=PAPSS2 PE=1 SV=2	43	21	37	20	614	69.5	8.03	792	102.4	105.1	103.3	96.7	96.2	96.2	103.6	96.3667	-	1.07506	0.000873787
Q92643	PIGK	GPI-anchor transamidase OS=Homo sapiens OX=9606 GN=PIGK PE=1 SV=2	23	6	7	6	395	45.2	6.16	204	105	102.7	103.1	98.2	94.5	96.4	103.6	96.3667	-	1.07506	0.00486302
Q96C01	FAM136A	Protein FAM136A OS=Homo sapiens OX=9606 GN=FAM136A PE=1 SV=1	40	6	11	6	138	15.6	7.61	189	103.9	103.1	103.9	98	95.9	95.3	103.633	96.4	-	1.07503	0.00109806
Q01518	CAP1	Adenylyl cyclase-associated protein 1 OS=Homo sapiens OX=9606 GN=CAP1 PE=1 SV=5	60	31	87	30	475	51.9	8.06	1583	102	105.4	103.5	96	97.6	95.6	103.633	96.4	-	1.07503	0.00334913
Q8N1Q1	CA13	Carbonic anhydrase 13 OS=Homo sapiens OX=9606 GN=CA13 PE=1 SV=1	18	4	6	4	262	29.4	6.96	126	104.2	104.3	102.4	92.9	90.1	106.2	103.633	96.4	-	1.07503	0.221871
P57737	CORO7	Coronin-7 OS=Homo sapiens OX=9606 GN=CORO7 PE=1 SV=2	20	14	16	14	925	100.5	5.8	313	104.8	103	103	95.9	98	95.3	103.6	96.4	-	1.07469	0.00208474
Q08431	MFGE8	Lactadherin OS=Homo sapiens OX=9606 GN=MFGE8 PE=1 SV=3	18	6	6	6	387	43.1	8.15	98	106.4	105.1	99.3	97.7	98.3	93.2	103.6	96.4	-	1.07469	0.0566758
Q15283	RASA2	Ras GTPase-activating protein 2 OS=Homo sapiens OX=9606 GN=RASA2 PE=1 SV=3	9	7	7	7	850	96.6	7.2	93	96.8	106.8	107.2	91.8	96.6	100.8	103.6	96.4	-	1.07469	0.167948
Q14667	KIAA0100	Protein KIAA0100 OS=Homo sapiens OX=9606 GN=KIAA0100 PE=1 SV=3	2	3	3	3	2235	253.5	7.14	46	118	95.8	97	104.2	87.8	97.2	103.6	96.4	-	1.07469	0.451198
Q9C0H2	TTYH3	Protein tweety homolog 3 OS=Homo sapiens OX=9606 GN=TTYH3 PE=1 SV=3	6	3	4	3	523	57.5	5.39	80	105.4	98.8	106.5	95.2	91.7	102.3	103.567	96.4	-	1.07434	0.142865
Q9BRG1	VPS25	Vacuolar protein-sorting-associated protein 25 OS=Homo sapiens OX=9606 GN=VPS25 PE=1 SV=1	69	9	11	9	176	20.7	6.34	269	105.5	102.7	102.5	96	98.6	94.6	103.567	96.4	-	1.07434	0.0092111
Q9Y6N1	COX11	Cytochrome c oxidase assembly protein COX11, mitochondrial OS=Homo sapiens OX=9606 GN=COX11 PE=1 SV=3	14	2	2	2	276	31.4	9.06	57	107.1	98	105.7	94.5	96.8	98	103.6	96.4333	-	1.07432	0.0758854
O15037	KHNYN	Protein KHNYN OS=Homo sapiens OX=9606 GN=KHNYN PE=1 SV=3	2	1	1	1	678	74.5	7.02	51	108.4	78.1	124.3	107.4	81.1	100.8	103.6	96.4333	-	1.07432	0.671458
Q9Y3X0	CCDC9	Coiled-coil domain-containing protein 9 OS=Homo sapiens OX=9606 GN=CCDC9 PE=1 SV=1	16	9	9	9	531	59.7	5.4	145	104.4	101.9	104.5	94.1	95.5	99.7	103.6	96.4333	-	1.07432	0.0190824
Q8IUC6	TICAM1	TIR domain-containing adapter molecule 1 OS=Homo sapiens OX=9606 GN=TICAM1 PE=1 SV=1	1	1	1	1	712	76.4	5.41	0	107.7	99.4	103.6	97.7	94.7	96.9	103.567	96.4333	-	1.07397	0.0494043
P24941	CDK2	Cyclin-dependent kinase 2 OS=Homo sapiens OX=9606 GN=CDK2 PE=1 SV=2	41	12	16	11	298	33.9	8.68	251	102	101.8	106.9	92.8	93.7	102.8	103.567	96.4333	-	1.07397	0.118831
O75323	NIPSNAP2	Protein NipSnap homolog 2 OS=Homo sapiens OX=9606 GN=NIPSNAP2 PE=1 SV=1	24	6	7	4	286	33.7	9.36	73	102.3	103.9	104.5	98.5	94.7	96.1	103.567	96.4333	-	1.07397	0.00521483
Q9Y639	NPTN	Neuroplastin OS=Homo sapiens OX=9606 GN=NPTN PE=1 SV=2	18	7	8	7	398	44.4	7.99	97	104.2	105.6	100.9	96.4	99.1	93.8	103.567	96.4333	-	1.07397	0.0261228
Q9P0M9	MRPL27	39S ribosomal protein L27, mitochondrial OS=Homo sapiens OX=9606 GN=MRPL27 PE=1 SV=1	30	4	4	4	148	16.1	10.42	74	106.3	102	102.4	96.9	95.5	96.9	103.567	96.4333	-	1.07397	0.00790802
Q96MX6	WDR92	WD repeat-containing protein 92 OS=Homo sapiens OX=9606 GN=WDR92 PE=1 SV=1	28	8	8	8	357	39.7	8.09	123	109.1	102.4	99.2	95.2	94.5	99.6	103.567	96.4333	-	1.07397	0.098492
P60983	GMFB	Glia maturation factor beta OS=Homo sapiens OX=9606 GN=GMFB PE=1 SV=2	54	6	10	5	142	16.7	5.29	305	105	104.3	101.4	97.2	99.8	92.3	103.567	96.4333	-	1.07397	0.0441012
Q9P0T7	TMEM9	Transmembrane protein 9 OS=Homo sapiens OX=9606 GN=TMEM9 PE=1 SV=1	10	1	1	1	183	20.6	6.65	24	102.6	101.8	106.3	97	93.5	98.8	103.567	96.4333	-	1.07397	0.0267008
Q86TP1	PRUNE1	Exopolyphosphatase PRUNE1 OS=Homo sapiens OX=9606 GN=PRUNE1 PE=1 SV=2	7	2	3	2	453	50.2	5.5	37	104.4	108.8	97.5	93.2	101.6	94.5	103.567	96.4333	-	1.07397	0.164558
P00491	PNP	Purine nucleoside phosphorylase OS=Homo sapiens OX=9606 GN=PNP PE=1 SV=2	72	15	31	15	289	32.1	6.95	710	103.3	105.9	101.5	96.7	96.1	96.5	103.567	96.4333	-	1.07397	0.00521483
O00635	TRIM38	E3 ubiquitin-protein ligase TRIM38 OS=Homo sapiens OX=9606 GN=TRIM38 PE=1 SV=1	5	2	2	2	465	53.4	7.02	28	105.7	100	105	98.6	93.5	97.2	103.567	96.4333	-	1.07397	0.0387091
Q7Z2W9	MRPL21	39S ribosomal protein L21, mitochondrial OS=Homo sapiens OX=9606 GN=MRPL21 PE=1 SV=2	15	2	3	2	205	22.8	9.89	114	103.1	99.9	107.6	96.6	93.9	98.8	103.533	96.4333	-	1.07363	0.0549767
Q9NVA1	UQCC1	Ubiquinol-cytochrome-c reductase complex assembly factor 1 OS=Homo sapiens OX=9606 GN=UQCC1 PE=1 SV=3	16	5	6	5	299	34.6	8.91	156	107.4	103.5	99.7	94.1	101.7	93.5	103.533	96.4333	-	1.07363	0.108735
Q9H814	PHAX	Phosphorylated adapter RNA export protein OS=Homo sapiens OX=9606 GN=PHAX PE=1 SV=1	20	5	5	5	394	44.4	5.4	108	107.2	100.8	102.6	94	95.5	99.8	103.533	96.4333	-	1.07363	0.0512268
Q14520	HABP2	Hyaluronan-binding protein 2 OS=Homo sapiens OX=9606 GN=HABP2 PE=1 SV=1	3	2	2	2	560	62.6	6.54	22	104.2	102.6	103.8	97.1	95.4	96.8	103.533	96.4333	-	1.07363	0.000565149
Q7Z6I8	C5orf24	UPF0461 protein C5orf24 OS=Homo sapiens OX=9606 GN=C5orf24 PE=1 SV=1	7	1	1	1	188	20.1	9.85	78	104.7	109.4	96.5	102.9	94.4	92	103.533	96.4333	-	1.07363	0.22972
P10606	COX5B	Cytochrome c oxidase subunit 5B, mitochondrial OS=Homo sapiens OX=9606 GN=COX5B PE=1 SV=2	46	6	12	6	129	13.7	8.81	192	107.4	102.2	101.1	95.2	96.7	97.5	103.567	96.4667	-	1.0736	0.0259929
Q7Z4V5	HDGFL2	Hepatoma-derived growth factor-related protein 2 OS=Homo sapiens OX=9606 GN=HDGFL2 PE=1 SV=1	20	12	17	11	671	74.3	7.49	225	103.7	102.9	104.1	94.1	98.9	96.4	103.567	96.4667	-	1.0736	0.0076829
Q9H269	VPS16	Vacuolar protein sorting-associated protein 16 homolog OS=Homo sapiens OX=9606 GN=VPS16 PE=1 SV=2	11	6	9	6	839	94.6	6.77	302	106.1	100.3	104.3	98.6	92.2	98.6	103.567	96.4667	-	1.0736	0.0603984
Q9UJX3	ANAPC7	Anaphase-promoting complex subunit 7 OS=Homo sapiens OX=9606 GN=ANAPC7 PE=1 SV=4	17	8	9	8	599	66.8	5.64	256	107.1	99	104.6	94.6	96.7	98.1	103.567	96.4667	-	1.0736	0.0524984
Q96D96	HVCN1	Voltage-gated hydrogen channel 1 OS=Homo sapiens OX=9606 GN=HVCN1 PE=1 SV=1	5	1	1	1	273	31.7	6.8	36	102.3	100.6	107.8	97	97.7	94.7	103.567	96.4667	-	1.0736	0.0393216
P43490	NAMPT	Nicotinamide phosphoribosyltransferase OS=Homo sapiens OX=9606 GN=NAMPT PE=1 SV=1	78	35	90	35	491	55.5	7.15	2378	105.9	104.5	100.3	95	99.8	94.6	103.567	96.4667	-	1.0736	0.0401647
Q99712	KCNJ15	ATP-sensitive inward rectifier potassium channel 15 OS=Homo sapiens OX=9606 GN=KCNJ15 PE=1 SV=2	4	1	2	1	375	42.6	7.69	0	107.6	100.4	102.7	104.5	97.5	87.4	103.567	96.4667	-	1.0736	0.258764
Q96HU1	SGSM3	Small G protein signaling modulator 3 OS=Homo sapiens OX=9606 GN=SGSM3 PE=1 SV=1	1	1	1	1	749	85.3	6	22	108.3	98.9	103.4	102.5	94.8	92.1	103.533	96.4667	-	1.07326	0.162417
Q9UGU0	TCF20	Transcription factor 20 OS=Homo sapiens OX=9606 GN=TCF20 PE=1 SV=3	3	4	4	4	1960	211.6	9.04	20	106	101.6	103	91.6	96.4	101.4	103.533	96.4667	-	1.07326	0.085702
P49023	PXN	Paxillin OS=Homo sapiens OX=9606 GN=PXN PE=1 SV=3	40	17	24	17	591	64.5	6.19	503	104.2	104.7	101.7	95.4	97.3	96.7	103.533	96.4667	-	1.07326	0.00286102
P10746	UROS	Uroporphyrinogen-III synthase OS=Homo sapiens OX=9606 GN=UROS PE=1 SV=1	15	2	2	2	265	28.6	5.48	100	104	99.6	107	99.5	97.6	92.3	103.533	96.4667	-	1.07326	0.0809243
Q9BT09	CNPY3	Protein canopy homolog 3 OS=Homo sapiens OX=9606 GN=CNPY3 PE=1 SV=1	17	5	6	5	278	30.7	5.49	186	105.7	101.6	103.3	95.9	100.5	93	103.533	96.4667	-	1.07326	0.0467672
O43303	CCP110	Centriolar coiled-coil protein of 110 kDa OS=Homo sapiens OX=9606 GN=CCP110 PE=1 SV=3	2	1	1	1	1012	113.4	8.65	43	104	102.2	104.4	93.3	106.2	89.9	103.533	96.4667	-	1.07326	0.231251
Q8N128	FAM177A1	Protein FAM177A1 OS=Homo sapiens OX=9606 GN=FAM177A1 PE=1 SV=1	6	1	1	1	213	23.7	4.45	56	103.4	108.1	99.1	94.9	98.7	95.8	103.533	96.4667	-	1.07326	0.0676467
Q86W92	PPFIBP1	Liprin-beta-1 OS=Homo sapiens OX=9606 GN=PPFIBP1 PE=1 SV=2	11	8	9	8	1011	114	5.55	205	105.5	101.6	103.4	98.7	93	97.7	103.5	96.4667	-	1.07291	0.0280641
O43677	NDUFC1	NADH dehydrogenase [ubiquinone] 1 subunit C1, mitochondrial OS=Homo sapiens OX=9606 GN=NDUFC1 PE=1 SV=1	14	1	1	1	76	8.7	10.2	0	117.6	98.6	94.3	102.4	88.9	98.1	103.5	96.4667	-	1.07291	0.438951
Q9H1B5	XYLT2	Xylosyltransferase 2 OS=Homo sapiens OX=9606 GN=XYLT2 PE=1 SV=2	1	1	1	1	865	96.7	8.22	0	105.7	86.9	117.9	91.5	97.4	100.5	103.5	96.4667	-	1.07291	0.495691
Q96RQ3	MCCC1	Methylcrotonoyl-CoA carboxylase subunit alpha, mitochondrial OS=Homo sapiens OX=9606 GN=MCCC1 PE=1 SV=3	21	11	12	11	725	80.4	7.78	314	102.8	104.3	103.4	98.9	97.8	92.7	103.5	96.4667	-	1.07291	0.0229573
Q14320	FAM50A	Protein FAM50A OS=Homo sapiens OX=9606 GN=FAM50A PE=1 SV=2	31	9	12	9	339	40.2	6.83	187	104.2	104	102.3	95.7	95.1	98.6	103.5	96.4667	-	1.07291	0.00472963
Q9Y3M8	STARD13	StAR-related lipid transfer protein 13 OS=Homo sapiens OX=9606 GN=STARD13 PE=1 SV=2	4	4	4	4	1113	124.9	7.02	47	99.9	104.8	105.9	95.8	94.4	99.3	103.533	96.5	-	1.07288	0.0402434
P11216	PYGB	Glycogen phosphorylase, brain form OS=Homo sapiens OX=9606 GN=PYGB PE=1 SV=5	56	43	75	36	843	96.6	6.86	1561	103.8	105.6	101.1	96.1	99.1	94.3	103.5	96.5	-	1.07254	0.0216953
Q9H9S4	CAB39L	Calcium-binding protein 39-like OS=Homo sapiens OX=9606 GN=CAB39L PE=1 SV=3	14	4	6	3	337	39.1	8.4	136	100.4	106.1	104	93.1	95.1	101.3	103.5	96.5	-	1.07254	0.0784079
O43715	TRIAP1	TP53-regulated inhibitor of apoptosis 1 OS=Homo sapiens OX=9606 GN=TRIAP1 PE=1 SV=1	45	3	3	3	76	8.8	5.48	75	115.7	95.1	99.7	101.2	87.3	101	103.5	96.5	-	1.07254	0.417745
Q8NCG7	DAGLB	Sn1-specific diacylglycerol lipase beta OS=Homo sapiens OX=9606 GN=DAGLB PE=1 SV=2	15	7	8	7	672	73.7	6.55	238	106.6	99.4	104.5	98.1	94.5	96.9	103.5	96.5	-	1.07254	0.0426199
Q9NWT6	HIF1AN	Hypoxia-inducible factor 1-alpha inhibitor OS=Homo sapiens OX=9606 GN=HIF1AN PE=1 SV=2	21	5	5	5	349	40.3	5.57	130	109.9	101.1	99.5	98.7	95	95.8	103.5	96.5	-	1.07254	0.110313
Q676U5	ATG16L1	Autophagy-related protein 16-1 OS=Homo sapiens OX=9606 GN=ATG16L1 PE=1 SV=2	6	4	5	4	607	68.2	6.64	96	104.7	106	99.8	92.5	98.1	98.9	103.5	96.5	-	1.07254	0.064227
Q9UDT6	CLIP2	CAP-Gly domain-containing linker protein 2 OS=Homo sapiens OX=9606 GN=CLIP2 PE=1 SV=1	8	10	10	7	1046	115.8	6.73	185	104.1	103	103.4	96.1	98.8	94.6	103.5	96.5	-	1.07254	0.0052896
Q8NB37	GATD1	Glutamine amidotransferase-like class 1 domain-containing protein 1 OS=Homo sapiens OX=9606 GN=GATD1 PE=1 SV=1	30	4	5	4	220	23.3	6.61	140	100.5	101.4	108.6	94.7	97	97.8	103.5	96.5	-	1.07254	0.0621445
Q15738	NSDHL	Sterol-4-alpha-carboxylate 3-dehydrogenase, decarboxylating OS=Homo sapiens OX=9606 GN=NSDHL PE=1 SV=2	36	10	12	10	373	41.9	8.06	278	104	105.7	100.8	94.6	98.4	96.5	103.5	96.5	-	1.07254	0.0179479
Q13423	NNT	NAD(P) transhydrogenase, mitochondrial OS=Homo sapiens OX=9606 GN=NNT PE=1 SV=3	38	36	57	36	1086	113.8	8.09	1215	102.3	104.4	103.7	94.1	100.5	94.9	103.467	96.5	-	1.07219	0.0297015
Q96ME7	ZNF512	Zinc finger protein 512 OS=Homo sapiens OX=9606 GN=ZNF512 PE=1 SV=2	12	5	5	5	567	64.6	9.76	117	106.1	100.1	104.2	94.2	97.7	97.6	103.467	96.5	-	1.07219	0.0299437
Q5VT97	SYDE2	Rho GTPase-activating protein SYDE2 OS=Homo sapiens OX=9606 GN=SYDE2 PE=1 SV=2	1	1	1	1	1194	133.1	8.57	0	100	99.9	110.5	96.3	88.3	104.9	103.467	96.5	-	1.07219	0.30628
O95471	CLDN7	Claudin-7 OS=Homo sapiens OX=9606 GN=CLDN7 PE=1 SV=4	16	2	3	2	211	22.4	8.6	142	103.7	98.7	108	96.6	88.5	104.4	103.467	96.5	-	1.07219	0.260428
Q96QE5	TEFM	Transcription elongation factor, mitochondrial OS=Homo sapiens OX=9606 GN=TEFM PE=1 SV=1	15	5	5	5	360	41.7	9.32	90	102.8	102.2	105.4	97.7	93.1	98.7	103.467	96.5	-	1.07219	0.0246553
O75348	ATP6V1G1	V-type proton ATPase subunit G 1 OS=Homo sapiens OX=9606 GN=ATP6V1G1 PE=1 SV=3	73	7	11	7	118	13.7	8.79	186	101.9	104.2	104.4	94.7	98.5	96.4	103.5	96.5333	-	1.07217	0.00688394
Q10472	GALNT1	Polypeptide N-acetylgalactosaminyltransferase 1 OS=Homo sapiens OX=9606 GN=GALNT1 PE=1 SV=1	3	2	2	2	559	64.2	7.72	38	105.4	103	102.1	97.5	96.9	95.2	103.5	96.5333	-	1.07217	0.00440401
Q13155	AIMP2	Aminoacyl tRNA synthase complex-interacting multifunctional protein 2 OS=Homo sapiens OX=9606 GN=AIMP2 PE=1 SV=2	26	7	11	7	320	35.3	8.22	203	103.6	104.7	102.2	93.7	97.1	98.8	103.5	96.5333	-	1.07217	0.013862
Q5SNT2	TMEM201	Transmembrane protein 201 OS=Homo sapiens OX=9606 GN=TMEM201 PE=1 SV=1	5	3	3	3	666	72.2	9.22	82	103.1	107.7	99.7	88.3	102.5	98.8	103.5	96.5333	-	1.07217	0.223735
Q9UNF1	MAGED2	Melanoma-associated antigen D2 OS=Homo sapiens OX=9606 GN=MAGED2 PE=1 SV=2	33	19	25	19	606	64.9	9.32	541	105.2	102.4	102.8	96.1	96.6	96.9	103.467	96.5333	-	1.07182	0.00155974
P42684	ABL2	Tyrosine-protein kinase ABL2 OS=Homo sapiens OX=9606 GN=ABL2 PE=1 SV=1	3	3	3	3	1182	128.3	8.07	28	101.2	104.9	104.3	95	93.6	101	103.467	96.5333	-	1.07182	0.0526211
O00330	PDHX	Pyruvate dehydrogenase protein X component, mitochondrial OS=Homo sapiens OX=9606 GN=PDHX PE=1 SV=3	32	13	17	13	501	54.1	8.66	365	102.7	104.2	103.5	96.9	98	94.7	103.467	96.5333	-	1.07182	0.00284825
Q9Y6D5	ARFGEF2	Brefeldin A-inhibited guanine nucleotide-exchange protein 2 OS=Homo sapiens OX=9606 GN=ARFGEF2 PE=1 SV=3	17	27	33	18	1785	201.9	6.33	700	104.9	103.1	102.4	97.2	95.6	96.8	103.467	96.5333	-	1.07182	0.0014416
Q6UW68	TMEM205	Transmembrane protein 205 OS=Homo sapiens OX=9606 GN=TMEM205 PE=1 SV=1	21	3	5	3	189	21.2	8.62	123	98.3	101.4	110.7	96	101.7	91.9	103.467	96.5333	-	1.07182	0.213053
Q9Y4G2	PLEKHM1	Pleckstrin homology domain-containing family M member 1 OS=Homo sapiens OX=9606 GN=PLEKHM1 PE=1 SV=3	1	1	1	1	1056	117.4	6.52	21	107.8	92	110.6	100.5	88.8	100.3	103.467	96.5333	-	1.07182	0.375714
Q9H2H8	PPIL3	Peptidyl-prolyl cis-trans isomerase-like 3 OS=Homo sapiens OX=9606 GN=PPIL3 PE=1 SV=1	58	9	12	9	161	18.1	6.79	197	106.4	101.6	102.4	97.6	99.4	92.6	103.467	96.5333	-	1.07182	0.0512113
Q9HB90	RRAGC	Ras-related GTP-binding protein C OS=Homo sapiens OX=9606 GN=RRAGC PE=1 SV=1	19	7	8	7	399	44.2	5.1	177	104.6	102.2	103.6	95.2	99.3	95.1	103.467	96.5333	-	1.07182	0.0110196
Q13136	PPFIA1	Liprin-alpha-1 OS=Homo sapiens OX=9606 GN=PPFIA1 PE=1 SV=1	19	20	22	14	1202	135.7	6.29	402	107.2	101.7	101.5	96.4	91.8	101.4	103.467	96.5333	-	1.07182	0.106709
P45984	MAPK9	Mitogen-activated protein kinase 9 OS=Homo sapiens OX=9606 GN=MAPK9 PE=1 SV=2	11	5	7	3	424	48.1	5.63	99	103.9	104.5	102	98.8	94.9	95.9	103.467	96.5333	-	1.07182	0.0075782
Q8IY17	PNPLA6	Neuropathy target esterase OS=Homo sapiens OX=9606 GN=PNPLA6 PE=1 SV=3	16	17	20	17	1375	150.9	7.74	568	103.4	101.8	105.2	98.4	95.4	95.8	103.467	96.5333	-	1.07182	0.00698737
Q15006	EMC2	ER membrane protein complex subunit 2 OS=Homo sapiens OX=9606 GN=EMC2 PE=1 SV=1	24	6	9	6	297	34.8	6.57	165	107.9	94.4	108.1	93.6	94.7	101.3	103.467	96.5333	-	1.07182	0.248044
P05165	PCCA	Propionyl-CoA carboxylase alpha chain, mitochondrial OS=Homo sapiens OX=9606 GN=PCCA PE=1 SV=4	3	1	1	1	728	80	7.52	45	85.9	110.3	114.2	99.5	96	94.1	103.467	96.5333	-	1.07182	0.483843
P69849	NOMO3	Nodal modulator 3 OS=Homo sapiens OX=9606 GN=NOMO3 PE=3 SV=2	34	27	35	1	1222	134	5.67	864	102.8	107.4	100.2	96.2	97	96.4	103.467	96.5333	-	1.07182	0.0307183
Q9Y4Z0	LSM4	U6 snRNA-associated Sm-like protein LSm4 OS=Homo sapiens OX=9606 GN=LSM4 PE=1 SV=1	27	5	10	5	139	15.3	9.99	172	97.7	103.9	108.7	93.4	98.5	97.7	103.433	96.5333	-	1.07148	0.124327
P51531	SMARCA2	Probable global transcription activator SNF2L2 OS=Homo sapiens OX=9606 GN=SMARCA2 PE=1 SV=2	11	13	19	5	1590	181.2	7.2	377	95.1	98	117.2	94	93.8	101.8	103.433	96.5333	-	1.07148	0.404906
Q14254	FLOT2	Flotillin-2 OS=Homo sapiens OX=9606 GN=FLOT2 PE=1 SV=2	50	21	32	21	428	47	5.25	627	107	100.2	103.1	96.3	94.8	98.5	103.433	96.5333	-	1.07148	0.0371168
O15235	MRPS12	28S ribosomal protein S12, mitochondrial OS=Homo sapiens OX=9606 GN=MRPS12 PE=1 SV=1	24	2	2	2	138	15.2	10.29	54	102.3	97.1	111	99.2	93.5	97	103.467	96.5667	-	1.07145	0.190402
Q9Y5Q9	GTF3C3	General transcription factor 3C polypeptide 3 OS=Homo sapiens OX=9606 GN=GTF3C3 PE=1 SV=1	2	1	1	1	886	101.2	5.07	57	105.6	84.9	119.9	91.8	77.7	120.2	103.467	96.5667	-	1.07145	0.690423
Q4V328	GRIPAP1	GRIP1-associated protein 1 OS=Homo sapiens OX=9606 GN=GRIPAP1 PE=1 SV=2	17	10	12	10	841	95.9	5.11	232	101.7	101.8	106.8	98.8	95.6	95.3	103.433	96.5667	-	1.07111	0.0273829
Q9UI09	NDUFA12	NADH dehydrogenase [ubiquinone] 1 alpha subcomplex subunit 12 OS=Homo sapiens OX=9606 GN=NDUFA12 PE=1 SV=1	17	2	2	2	145	17.1	9.63	64	113.2	100.7	96.4	101.1	95.9	92.7	103.433	96.5667	-	1.07111	0.2875
O14578	CIT	Citron Rho-interacting kinase OS=Homo sapiens OX=9606 GN=CIT PE=1 SV=2	5	9	11	9	2027	231.3	6.57	171	102.1	96.8	111.4	94	95.3	100.4	103.433	96.5667	-	1.07111	0.217236
Q8TBF4	ZCRB1	Zinc finger CCHC-type and RNA-binding motif-containing protein 1 OS=Homo sapiens OX=9606 GN=ZCRB1 PE=1 SV=2	11	2	2	2	217	24.6	8.53	17	101.5	95.9	112.9	96.4	96.4	96.9	103.433	96.5667	-	1.07111	0.241954
Q9NSC5	HOMER3	Homer protein homolog 3 OS=Homo sapiens OX=9606 GN=HOMER3 PE=1 SV=2	5	1	1	1	361	39.8	5.45	45	95.8	98.2	116.3	111.5	86.3	91.9	103.433	96.5667	-	1.07111	0.530482
Q15650	TRIP4	Activating signal cointegrator 1 OS=Homo sapiens OX=9606 GN=TRIP4 PE=1 SV=4	11	5	5	5	581	66.1	7.85	93	100.9	103.1	106.3	93.3	98	98.4	103.433	96.5667	-	1.07111	0.0388154
P34896	SHMT1	Serine hydroxymethyltransferase, cytosolic OS=Homo sapiens OX=9606 GN=SHMT1 PE=1 SV=1	29	10	16	9	483	53	7.71	374	103.1	104.6	102.6	95.1	99.2	95.4	103.433	96.5667	-	1.07111	0.00906425
Q2NKX8	ERCC6L	DNA excision repair protein ERCC-6-like OS=Homo sapiens OX=9606 GN=ERCC6L PE=1 SV=1	7	6	6	6	1250	141	5.31	81	101.5	95.9	112.9	94.9	96.2	98.6	103.433	96.5667	-	1.07111	0.250794
Q9Y2S2	CRYL1	Lambda-crystallin homolog OS=Homo sapiens OX=9606 GN=CRYL1 PE=1 SV=3	27	6	7	6	319	35.4	6.18	141	104.7	99.4	106.1	100.8	97.8	91.1	103.4	96.5667	-	1.07076	0.124127
Q8TCA0	LRRC20	Leucine-rich repeat-containing protein 20 OS=Homo sapiens OX=9606 GN=LRRC20 PE=1 SV=1	30	5	6	5	184	20.5	6.55	100	103.4	103.3	103.5	99.3	93.1	97.3	103.4	96.5667	-	1.07076	0.0201489
Q13426	XRCC4	DNA repair protein XRCC4 OS=Homo sapiens OX=9606 GN=XRCC4 PE=1 SV=2	34	10	11	10	336	38.3	4.98	231	102	102.6	105.6	94.6	97.2	97.9	103.4	96.5667	-	1.07076	0.0103561
P05556	ITGB1	Integrin beta-1 OS=Homo sapiens OX=9606 GN=ITGB1 PE=1 SV=2	38	28	58	28	798	88.4	5.39	974	106	103.5	100.7	98.2	98.6	92.9	103.4	96.5667	-	1.07076	0.0460355
P60002	ELOF1	Transcription elongation factor 1 homolog OS=Homo sapiens OX=9606 GN=ELOF1 PE=1 SV=1	22	1	1	1	83	9.5	8	61	109.1	102.6	98.6	94.1	97.1	98.6	103.433	96.6	-	1.07074	0.10969
Q8WUP2	FBLIM1	Filamin-binding LIM protein 1 OS=Homo sapiens OX=9606 GN=FBLIM1 PE=1 SV=2	7	2	3	2	373	40.6	6.02	103	111.5	98	100.8	99.3	88.8	101.7	103.433	96.6	-	1.07074	0.297535
Q8TAF5	FLVCR1-DT	Putative uncharacterized protein LQK1 OS=Homo sapiens OX=9606 GN=FLVCR1-DT PE=5 SV=1	13	1	1	1	88	10	11.37	0	100.1	101.3	108.9	98.9	90.1	100.8	103.433	96.6	-	1.07074	0.186891
Q15102	PAFAH1B3	Platelet-activating factor acetylhydrolase IB subunit gamma OS=Homo sapiens OX=9606 GN=PAFAH1B3 PE=1 SV=1	39	8	11	8	231	25.7	6.84	227	102.3	105.1	102.9	92.7	101.1	96	103.433	96.6	-	1.07074	0.0575177
Q71UM5	RPS27L	40S ribosomal protein S27-like OS=Homo sapiens OX=9606 GN=RPS27L PE=1 SV=3	29	2	7	1	84	9.5	9.45	225	100.7	106.1	103.4	102.1	92.1	95.6	103.4	96.6	-	1.07039	0.109811
Q15654	TRIP6	Thyroid receptor-interacting protein 6 OS=Homo sapiens OX=9606 GN=TRIP6 PE=1 SV=3	26	9	10	9	476	50.3	7.37	217	103.9	102.7	103.6	94.8	94.1	100.9	103.4	96.6	-	1.07039	0.0360139
P49257	LMAN1	Protein ERGIC-53 OS=Homo sapiens OX=9606 GN=LMAN1 PE=1 SV=2	40	20	29	20	510	57.5	6.77	428	107.7	99.6	102.9	95.3	98	96.5	103.4	96.6	-	1.07039	0.0516787
Q5HYI7	MTX3	Metaxin-3 OS=Homo sapiens OX=9606 GN=MTX3 PE=1 SV=2	16	5	6	5	312	35.1	7.8	111	104.9	102.2	103.1	98.6	94	97.2	103.4	96.6	-	1.07039	0.0124956
Q96CW1	AP2M1	AP-2 complex subunit mu OS=Homo sapiens OX=9606 GN=AP2M1 PE=1 SV=2	49	19	35	19	435	49.6	9.54	718	104	104.7	101.5	95.1	99.1	95.6	103.4	96.6	-	1.07039	0.0128687
P49006	MARCKSL1	MARCKS-related protein OS=Homo sapiens OX=9606 GN=MARCKSL1 PE=1 SV=2	18	3	5	3	195	19.5	4.67	163	101.3	106.8	102.1	98.5	95.2	96.1	103.4	96.6	-	1.07039	0.0263553
P00747	PLG	Plasminogen OS=Homo sapiens OX=9606 GN=PLG PE=1 SV=2	1	1	1	1	810	90.5	7.24	22	99.6	116.7	93.9	92.7	108.7	88.4	103.4	96.6	-	1.07039	0.50188
Q9NQE9	HINT3	Histidine triad nucleotide-binding protein 3 OS=Homo sapiens OX=9606 GN=HINT3 PE=1 SV=1	16	2	2	2	182	20.3	6.6	99	108.3	103.2	98.7	101.7	95.9	92.2	103.4	96.6	-	1.07039	0.157469
O43615	TIMM44	Mitochondrial import inner membrane translocase subunit TIM44 OS=Homo sapiens OX=9606 GN=TIMM44 PE=1 SV=2	50	22	35	22	452	51.3	8.32	849	102.6	104.3	103.3	96.4	94.6	98.8	103.4	96.6	-	1.07039	0.00660662
O95834	EML2	Echinoderm microtubule-associated protein-like 2 OS=Homo sapiens OX=9606 GN=EML2 PE=1 SV=1	25	13	17	13	649	70.6	6.32	320	105.4	102.8	102	97.6	97	95.2	103.4	96.6	-	1.07039	0.0056124
Q0VAA2	LRRC74A	Leucine-rich repeat-containing protein 74A OS=Homo sapiens OX=9606 GN=LRRC74A PE=2 SV=2	2	1	1	1	488	54.5	5.34	0	104.6	99.1	106.5	102	93.3	94.5	103.4	96.6	-	1.07039	0.12491
Q96ER9	CCDC51	Mitochondrial potassium channel OS=Homo sapiens OX=9606 GN=CCDC51 PE=1 SV=2	6	3	5	3	411	45.8	8.19	58	104.6	103.6	102	97.8	94.5	97.5	103.4	96.6	-	1.07039	0.00633544
Q6P1N0	CC2D1A	Coiled-coil and C2 domain-containing protein 1A OS=Homo sapiens OX=9606 GN=CC2D1A PE=1 SV=1	17	14	15	13	951	104	8.09	243	103.7	102.7	103.8	97.4	95.7	96.7	103.4	96.6	-	1.07039	0.000358131
P20645	M6PR	Cation-dependent mannose-6-phosphate receptor OS=Homo sapiens OX=9606 GN=M6PR PE=1 SV=1	26	5	7	5	277	31	5.83	230	106	105.1	99.1	97.9	98	93.9	103.4	96.6	-	1.07039	0.0561296
P30260	CDC27	Cell division cycle protein 27 homolog OS=Homo sapiens OX=9606 GN=CDC27 PE=1 SV=2	16	13	15	13	824	91.8	7.02	237	103.9	100.5	105.7	94.6	94.8	100.4	103.367	96.6	-	1.07005	0.0499759
Q7Z6J9	TSEN54	tRNA-splicing endonuclease subunit Sen54 OS=Homo sapiens OX=9606 GN=TSEN54 PE=1 SV=3	2	1	1	1	526	58.8	7.91	0	97.1	95.5	117.5	97.6	90.6	101.6	103.367	96.6	-	1.07005	0.433362
P22392	NME2	Nucleoside diphosphate kinase B OS=Homo sapiens OX=9606 GN=NME2 PE=1 SV=1	82	12	43	2	152	17.3	8.41	634	102.5	107.3	100.3	92.6	99.1	98.1	103.367	96.6	-	1.07005	0.0792848
Q16270	IGFBP7	Insulin-like growth factor-binding protein 7 OS=Homo sapiens OX=9606 GN=IGFBP7 PE=1 SV=1	7	2	2	2	282	29.1	7.9	46	108.9	102.2	99	92	106	91.8	103.367	96.6	-	1.07005	0.288379
Q96SZ5	ADO	2-aminoethanethiol dioxygenase OS=Homo sapiens OX=9606 GN=ADO PE=1 SV=2	28	4	5	4	270	29.7	6.04	71	104.3	99.9	105.9	97.1	95.4	97.3	103.367	96.6	-	1.07005	0.0232561
P54619	PRKAG1	5'-AMP-activated protein kinase subunit gamma-1 OS=Homo sapiens OX=9606 GN=PRKAG1 PE=1 SV=1	32	11	17	10	331	37.6	6.92	375	103.5	103.4	103.2	95.9	95	98.9	103.367	96.6	-	1.07005	0.00461249
Q12774	ARHGEF5	Rho guanine nucleotide exchange factor 5 OS=Homo sapiens OX=9606 GN=ARHGEF5 PE=1 SV=3	2	2	2	2	1597	176.7	5.53	0	111.3	103.6	95.2	94.6	100.4	94.8	103.367	96.6	-	1.07005	0.249171
Q8IUC4	RHPN2	Rhophilin-2 OS=Homo sapiens OX=9606 GN=RHPN2 PE=1 SV=1	10	7	7	7	686	76.9	6.8	79	102.6	104	103.6	96.3	95.3	98.3	103.4	96.6333	-	1.07002	0.00226592
Q8N5N7	MRPL50	39S ribosomal protein L50, mitochondrial OS=Homo sapiens OX=9606 GN=MRPL50 PE=1 SV=2	59	7	9	7	158	18.3	7.88	229	106.1	101.3	102.8	97.7	96.1	96.1	103.4	96.6333	-	1.07002	0.0110985
Q8TAF3	WDR48	WD repeat-containing protein 48 OS=Homo sapiens OX=9606 GN=WDR48 PE=1 SV=1	9	5	5	5	677	76.2	7.03	146	107.9	101.9	100.3	98.4	94.6	96.9	103.367	96.6333	-	1.06968	0.0584012
O14880	MGST3	Microsomal glutathione S-transferase 3 OS=Homo sapiens OX=9606 GN=MGST3 PE=1 SV=1	9	1	1	1	152	16.5	9.38	66	120	111.4	78.7	100	102.3	87.6	103.367	96.6333	-	1.06968	0.641327
Q9NQ34	TMEM9B	Transmembrane protein 9B OS=Homo sapiens OX=9606 GN=TMEM9B PE=1 SV=1	9	2	2	2	198	22.5	8.06	23	102.1	100.8	107.2	98.3	93.4	98.2	103.367	96.6333	-	1.06968	0.0566499
P49815	TSC2	Tuberin OS=Homo sapiens OX=9606 GN=TSC2 PE=1 SV=2	2	3	3	3	1807	200.5	7.31	26	105.6	102.3	102.2	95.6	94.3	100	103.367	96.6333	-	1.06968	0.0305906
Q96ET8	TVP23C	Golgi apparatus membrane protein TVP23 homolog C OS=Homo sapiens OX=9606 GN=TVP23C PE=1 SV=3	7	2	2	2	276	31.1	9.29	33	103.3	100.6	106.2	97.4	94.3	98.2	103.367	96.6333	-	1.06968	0.0284477
Q9Y3Q3	TMED3	Transmembrane emp24 domain-containing protein 3 OS=Homo sapiens OX=9606 GN=TMED3 PE=1 SV=1	6	1	1	1	217	24.8	5.6	0	106.8	103	100.2	92.4	103.9	93.6	103.333	96.6333	-	1.06933	0.179277
Q5SRE7	PHYHD1	Phytanoyl-CoA dioxygenase domain-containing protein 1 OS=Homo sapiens OX=9606 GN=PHYHD1 PE=1 SV=2	19	4	4	4	291	32.4	6.32	132	104.8	102.3	103	96.9	98.7	94.4	103.367	96.6667	-	1.06931	0.0099281
Q96KR6	FAM210B	Protein FAM210B, mitochondrial OS=Homo sapiens OX=9606 GN=FAM210B PE=1 SV=2	4	1	1	1	192	20.4	10.43	0	104	99.1	107	100	91.9	98.1	103.367	96.6667	-	1.06931	0.116822
P52907	CAPZA1	F-actin-capping protein subunit alpha-1 OS=Homo sapiens OX=9606 GN=CAPZA1 PE=1 SV=3	67	13	31	10	286	32.9	5.69	1164	104	104.2	101.9	97.4	98.1	94.5	103.367	96.6667	-	1.06931	0.00719715
O75832	PSMD10	26S proteasome non-ATPase regulatory subunit 10 OS=Homo sapiens OX=9606 GN=PSMD10 PE=1 SV=1	32	7	8	7	226	24.4	6.1	153	101.6	105.4	103.1	96.2	96.5	97.3	103.367	96.6667	-	1.06931	0.0043615
Q6P4E1	CASC4	Protein CASC4 OS=Homo sapiens OX=9606 GN=CASC4 PE=1 SV=2	6	3	3	3	436	49.5	5.29	52	107.3	101.1	101.7	98.2	95.2	96.6	103.367	96.6667	-	1.06931	0.0359616
Q5T0F9	CC2D1B	Coiled-coil and C2 domain-containing protein 1B OS=Homo sapiens OX=9606 GN=CC2D1B PE=1 SV=1	23	18	22	17	858	94.2	5.26	313	100.5	102.6	106.9	95.9	95.9	98.2	103.333	96.6667	-	1.06897	0.030551
Q13232	NME3	Nucleoside diphosphate kinase 3 OS=Homo sapiens OX=9606 GN=NME3 PE=1 SV=2	22	3	3	3	169	19	7.84	63	107.2	102.2	100.6	97.6	95.2	97.2	103.333	96.6667	-	1.06897	0.0347833
Q14974	KPNB1	Importin subunit beta-1 OS=Homo sapiens OX=9606 GN=KPNB1 PE=1 SV=2	46	32	89	32	876	97.1	4.78	2202	101.4	105.1	103.5	94.8	96.9	98.3	103.333	96.6667	-	1.06897	0.010716
P16278	GLB1	Beta-galactosidase OS=Homo sapiens OX=9606 GN=GLB1 PE=1 SV=2	12	6	10	6	677	76	6.57	171	106.3	102.7	101	96.9	96.6	96.5	103.333	96.6667	-	1.06897	0.0131124
Q5ZPR3	CD276	CD276 antigen OS=Homo sapiens OX=9606 GN=CD276 PE=1 SV=1	19	6	8	6	534	57.2	4.91	157	101.1	104.8	104.1	98.7	95.4	95.9	103.333	96.6667	-	1.06897	0.0120994
Q15019	SEPTIN2	Septin-2 OS=Homo sapiens OX=9606 GN=SEPTIN2 PE=1 SV=1	63	16	37	16	361	41.5	6.6	1055	102.6	104.3	103.1	95.3	97.4	97.3	103.333	96.6667	-	1.06897	0.00142632
Q8N4L2	PIP4P2	Type 2 phosphatidylinositol 4,5-bisphosphate 4-phosphatase OS=Homo sapiens OX=9606 GN=PIP4P2 PE=1 SV=1	18	3	3	3	257	28.1	8.68	37	99	96.5	114.5	96.2	97.7	96.1	103.333	96.6667	-	1.06897	0.303664
P18074	ERCC2	General transcription and DNA repair factor IIH helicase subunit XPD OS=Homo sapiens OX=9606 GN=ERCC2 PE=1 SV=1	8	4	5	4	760	86.9	7.15	88	105.3	103	101.7	98.2	94.3	97.5	103.333	96.6667	-	1.06897	0.0139663
P21953	BCKDHB	2-oxoisovalerate dehydrogenase subunit beta, mitochondrial OS=Homo sapiens OX=9606 GN=BCKDHB PE=1 SV=2	3	1	1	1	392	43.1	6.29	66	105.5	110.4	94.1	93.1	100.9	96	103.333	96.6667	-	1.06897	0.279809
Q9C0E8	LNPK	Endoplasmic reticulum junction formation protein lunapark OS=Homo sapiens OX=9606 GN=LNPK PE=1 SV=2	25	11	14	11	428	47.7	5.11	127	101.6	103.2	105.2	95	99	96	103.333	96.6667	-	1.06897	0.0137819
Q96JT2	SLC45A3	Solute carrier family 45 member 3 OS=Homo sapiens OX=9606 GN=SLC45A3 PE=2 SV=1	2	1	1	1	553	59.3	7.46	0	104.2	98.4	107.3	101.1	91.2	97.7	103.3	96.6667	-	1.06862	0.164489
Q8WVC6	DCAKD	Dephospho-CoA kinase domain-containing protein OS=Homo sapiens OX=9606 GN=DCAKD PE=1 SV=1	10	2	2	2	231	26.5	9.58	29	104.3	101.6	104	95.6	95.3	99.1	103.3	96.6667	-	1.06862	0.01121
Q13356	PPIL2	RING-type E3 ubiquitin-protein ligase PPIL2 OS=Homo sapiens OX=9606 GN=PPIL2 PE=1 SV=1	7	3	3	3	520	58.8	8.78	77	102.8	95.5	111.7	96.2	94.5	99.4	103.333	96.7	-	1.0686	0.24721
A6NFI3	ZNF316	Zinc finger protein 316 OS=Homo sapiens OX=9606 GN=ZNF316 PE=1 SV=1	1	1	1	1	1004	108.4	5.31	0	104.7	96.7	108.6	97.1	94.5	98.5	103.333	96.7	-	1.0686	0.14692
Q99594	TEAD3	Transcriptional enhancer factor TEF-5 OS=Homo sapiens OX=9606 GN=TEAD3 PE=1 SV=2	16	7	7	4	435	48.6	8.4	88	101.9	104.7	103.4	96.4	96.4	97.3	103.333	96.7	-	1.0686	0.00153966
Q86UE8	TLK2	Serine/threonine-protein kinase tousled-like 2 OS=Homo sapiens OX=9606 GN=TLK2 PE=1 SV=2	7	5	6	4	772	87.6	8.41	117	108.9	97.6	103.3	95.9	94.9	99.2	103.267	96.6667	-	1.06828	0.133332
Q14012	CAMK1	Calcium/calmodulin-dependent protein kinase type 1 OS=Homo sapiens OX=9606 GN=CAMK1 PE=1 SV=1	24	6	9	3	370	41.3	5.29	224	100.8	103.5	105.6	96.3	100.1	93.7	103.3	96.7	-	1.06825	0.0466508
Q9HD23	MRS2	Magnesium transporter MRS2 homolog, mitochondrial OS=Homo sapiens OX=9606 GN=MRS2 PE=1 SV=1	17	5	6	5	443	50.3	6.87	187	107.7	102	100.2	104.6	90.8	94.7	103.3	96.7	-	1.06825	0.231961
Q9NNW7	TXNRD2	Thioredoxin reductase 2, mitochondrial OS=Homo sapiens OX=9606 GN=TXNRD2 PE=1 SV=3	16	6	8	5	524	56.5	7.5	241	101.3	104.4	104.2	95.2	98.6	96.3	103.3	96.7	-	1.06825	0.00959568
P54646	PRKAA2	5'-AMP-activated protein kinase catalytic subunit alpha-2 OS=Homo sapiens OX=9606 GN=PRKAA2 PE=1 SV=2	12	5	7	2	552	62.3	7.75	166	101.4	101.5	107	89	93.9	107.2	103.3	96.7	-	1.06825	0.314536
Q9ULA0	DNPEP	Aspartyl aminopeptidase OS=Homo sapiens OX=9606 GN=DNPEP PE=1 SV=1	15	6	7	6	475	52.4	7.42	119	104.4	105.6	99.9	98.8	97.5	93.8	103.3	96.7	-	1.06825	0.0450329
P02748	C9	Complement component C9 OS=Homo sapiens OX=9606 GN=C9 PE=1 SV=2	4	2	4	2	559	63.1	5.59	97	99.1	97.5	113.3	94.2	108.2	87.7	103.3	96.7	-	1.06825	0.448394
Q02818	NUCB1	Nucleobindin-1 OS=Homo sapiens OX=9606 GN=NUCB1 PE=1 SV=4	53	19	25	19	461	53.8	5.25	626	103.9	102.3	103.7	97.7	97.8	94.6	103.3	96.7	-	1.06825	0.00478332
Q6ULP2	AFTPH	Aftiphilin OS=Homo sapiens OX=9606 GN=AFTPH PE=1 SV=3	13	7	7	7	936	102.1	4.54	237	101.2	100.7	107.9	97.8	93.1	99.2	103.267	96.7	-	1.06791	0.0911438
Q8TB61	SLC35B2	Adenosine 3'-phospho 5'-phosphosulfate transporter 1 OS=Homo sapiens OX=9606 GN=SLC35B2 PE=1 SV=1	10	4	5	4	432	47.5	9.16	125	103.1	103.2	103.5	95.7	98.6	95.8	103.267	96.7	-	1.06791	0.00237141
Q68CP9	ARID2	AT-rich interactive domain-containing protein 2 OS=Homo sapiens OX=9606 GN=ARID2 PE=1 SV=2	1	1	2	1	1835	197.3	7.42	32	96.9	101.4	111.5	103.9	97.4	88.8	103.267	96.7	-	1.06791	0.345423
Q99447	PCYT2	Ethanolamine-phosphate cytidylyltransferase OS=Homo sapiens OX=9606 GN=PCYT2 PE=1 SV=1	32	12	14	12	389	43.8	6.92	248	102	105.7	102.1	93.1	100.3	96.7	103.267	96.7	-	1.06791	0.0526381
Q3SXM5	HSDL1	Inactive hydroxysteroid dehydrogenase-like protein 1 OS=Homo sapiens OX=9606 GN=HSDL1 PE=1 SV=3	12	4	7	4	330	37	8.72	130	103.2	99.2	107.4	98.6	95.6	95.9	103.267	96.7	-	1.06791	0.0617955
Q5VZ89	DENND4C	DENN domain-containing protein 4C OS=Homo sapiens OX=9606 GN=DENND4C PE=1 SV=3	4	7	8	7	1909	212.6	6.83	136	102.3	98.5	109	94.7	96.6	98.8	103.267	96.7	-	1.06791	0.116659
P50895	BCAM	Basal cell adhesion molecule OS=Homo sapiens OX=9606 GN=BCAM PE=1 SV=2	7	4	4	4	628	67.4	5.81	50	105.4	98.8	105.6	99.7	95.3	95.1	103.267	96.7	-	1.06791	0.0712289
P46199	MTIF2	Translation initiation factor IF-2, mitochondrial OS=Homo sapiens OX=9606 GN=MTIF2 PE=1 SV=2	10	6	8	6	727	81.3	7.15	124	102.5	102.4	105	97.6	97.6	95	103.3	96.7333	-	1.06788	0.00566226
Q9NYU1	UGGT2	UDP-glucose:glycoprotein glucosyltransferase 2 OS=Homo sapiens OX=9606 GN=UGGT2 PE=1 SV=4	6	9	10	8	1516	174.6	6.89	81	102.5	97.4	110	96.5	96.9	96.8	103.3	96.7333	-	1.06788	0.147335
Q6XZF7	DNMBP	Dynamin-binding protein OS=Homo sapiens OX=9606 GN=DNMBP PE=1 SV=1	24	28	36	28	1577	177.2	5.39	825	105.2	100.8	103.8	97.1	95	98.1	103.267	96.7333	-	1.06754	0.014654
P01111	NRAS	GTPase NRas OS=Homo sapiens OX=9606 GN=NRAS PE=1 SV=1	66	9	16	2	189	21.2	5.17	468	101.9	104.4	103.5	97.2	97.8	95.2	103.267	96.7333	-	1.06754	0.0036839
P53004	BLVRA	Biliverdin reductase A OS=Homo sapiens OX=9606 GN=BLVRA PE=1 SV=2	35	9	10	9	296	33.4	6.44	229	104.9	103.3	101.6	94	99.1	97.1	103.267	96.7333	-	1.06754	0.0207377
P01009	SERPINA1	Alpha-1-antitrypsin OS=Homo sapiens OX=9606 GN=SERPINA1 PE=1 SV=3	2	1	1	1	418	46.7	5.59	24	100.9	101.3	107.6	95.7	106.6	87.9	103.267	96.7333	-	1.06754	0.325965
Q9H299	SH3BGRL3	SH3 domain-binding glutamic acid-rich-like protein 3 OS=Homo sapiens OX=9606 GN=SH3BGRL3 PE=1 SV=1	84	8	28	8	93	10.4	4.93	522	101.7	102.4	105.8	95.1	97.6	97.6	103.3	96.7667	-	1.06752	0.0125457
O95400	CD2BP2	CD2 antigen cytoplasmic tail-binding protein 2 OS=Homo sapiens OX=9606 GN=CD2BP2 PE=1 SV=1	25	5	5	5	341	37.6	4.61	102	99.5	105.5	104.7	92.4	96.5	101.3	103.233	96.7333	-	1.0672	0.110942
Q9NQW7	XPNPEP1	Xaa-Pro aminopeptidase 1 OS=Homo sapiens OX=9606 GN=XPNPEP1 PE=1 SV=3	32	16	22	16	623	69.9	5.67	600	106.5	101.5	101.7	94.8	99.8	95.6	103.233	96.7333	-	1.0672	0.0447796
Q92604	LPGAT1	Acyl-CoA:lysophosphatidylglycerol acyltransferase 1 OS=Homo sapiens OX=9606 GN=LPGAT1 PE=1 SV=1	13	4	6	4	370	43.1	8.92	96	99.4	100	110.4	96	98.5	95.8	103.267	96.7667	-	1.06717	0.151667
Q9BZE1	MRPL37	39S ribosomal protein L37, mitochondrial OS=Homo sapiens OX=9606 GN=MRPL37 PE=1 SV=2	30	10	11	10	423	48.1	8.59	228	105.2	103.9	100.7	100.7	93.5	96.1	103.267	96.7667	-	1.06717	0.0596393
Q93015	NAA80	N-alpha-acetyltransferase 80 OS=Homo sapiens OX=9606 GN=NAA80 PE=1 SV=2	10	2	2	2	286	31.4	7.85	26	105.8	100.9	103	94.6	98.6	97.1	103.233	96.7667	-	1.06683	0.0244563
Q658Y4	FAM91A1	Protein FAM91A1 OS=Homo sapiens OX=9606 GN=FAM91A1 PE=1 SV=3	20	15	17	15	838	93.9	6.39	185	102.4	103.2	104.1	99.2	94.4	96.7	103.233	96.7667	-	1.06683	0.0117117
Q9UGJ0	PRKAG2	5'-AMP-activated protein kinase subunit gamma-2 OS=Homo sapiens OX=9606 GN=PRKAG2 PE=1 SV=1	11	4	6	3	569	63	9.35	171	110.6	100.6	98.5	97.3	94.9	98.1	103.233	96.7667	-	1.06683	0.16873
P07093	SERPINE2	Glia-derived nexin OS=Homo sapiens OX=9606 GN=SERPINE2 PE=1 SV=1	2	1	1	1	398	44	9.29	30	99.2	100.1	110.4	99.4	91	99.9	103.233	96.7667	-	1.06683	0.233252
O43768	ENSA	Alpha-endosulfine OS=Homo sapiens OX=9606 GN=ENSA PE=1 SV=1	59	6	9	5	121	13.4	7.24	151	101.3	104.7	103.7	95.5	98.2	96.6	103.233	96.7667	-	1.06683	0.00717231
Q86UU1	PHLDB1	Pleckstrin homology-like domain family B member 1 OS=Homo sapiens OX=9606 GN=PHLDB1 PE=1 SV=1	8	9	11	9	1377	151.1	8.63	200	103.1	101.4	105.2	98.9	97.6	93.8	103.233	96.7667	-	1.06683	0.0264704
Q9BPZ3	PAIP2	Polyadenylate-binding protein-interacting protein 2 OS=Homo sapiens OX=9606 GN=PAIP2 PE=1 SV=1	17	2	2	2	127	15	4.12	34	101.5	103.5	104.7	91.1	99.7	99.5	103.233	96.7667	-	1.06683	0.0960936
P04114	APOB	Apolipoprotein B-100 OS=Homo sapiens OX=9606 GN=APOB PE=1 SV=2	2	10	13	9	4563	515.3	7.05	197	107.5	103.7	98.5	96.3	91.8	102.2	103.233	96.7667	-	1.06683	0.179876
O94830	DDHD2	Phospholipase DDHD2 OS=Homo sapiens OX=9606 GN=DDHD2 PE=1 SV=2	7	3	3	3	711	81	5.39	34	103.3	99.8	106.5	91.2	98.5	100.6	103.2	96.7667	-	1.06648	0.135105
Q9UNH7	SNX6	Sorting nexin-6 OS=Homo sapiens OX=9606 GN=SNX6 PE=1 SV=1	50	23	29	22	406	46.6	6.16	520	106.1	103.5	100	96.3	97.2	96.8	103.2	96.7667	-	1.06648	0.0227309
P10114	RAP2A	Ras-related protein Rap-2a OS=Homo sapiens OX=9606 GN=RAP2A PE=1 SV=1	45	6	7	2	183	20.6	4.82	244	107	97.7	104.9	96.9	97.5	95.9	103.2	96.7667	-	1.06648	0.0872766
P16885	PLCG2	1-phosphatidylinositol 4,5-bisphosphate phosphodiesterase gamma-2 OS=Homo sapiens OX=9606 GN=PLCG2 PE=1 SV=4	5	5	5	5	1265	147.8	6.64	54	102.6	103.7	103.4	96.6	96.3	97.5	103.233	96.8	-	1.06646	0.000190676
Q9Y6M1	IGF2BP2	Insulin-like growth factor 2 mRNA-binding protein 2 OS=Homo sapiens OX=9606 GN=IGF2BP2 PE=1 SV=2	37	19	27	16	599	66.1	8.46	494	104.6	103.1	102	98.1	95.9	96.4	103.233	96.8	-	1.06646	0.00306469
O95747	OXSR1	Serine/threonine-protein kinase OSR1 OS=Homo sapiens OX=9606 GN=OXSR1 PE=1 SV=1	52	21	38	18	527	58	6.43	1253	103.9	103.1	102.7	96.4	98.5	95.5	103.233	96.8	-	1.06646	0.00254281
O60518	RANBP6	Ran-binding protein 6 OS=Homo sapiens OX=9606 GN=RANBP6 PE=1 SV=2	6	5	14	2	1105	124.6	5.01	314	108.9	99.1	101.7	100.8	94	95.6	103.233	96.8	-	1.06646	0.146603
Q96FW1	OTUB1	Ubiquitin thioesterase OTUB1 OS=Homo sapiens OX=9606 GN=OTUB1 PE=1 SV=2	48	10	22	10	271	31.3	4.94	486	103.5	102.8	103.3	96.9	98.3	95.2	103.2	96.8	-	1.06612	0.00224522
Q9BQ13	KCTD14	BTB/POZ domain-containing protein KCTD14 OS=Homo sapiens OX=9606 GN=KCTD14 PE=1 SV=2	15	3	5	3	255	29.6	8.59	142	108.6	100.6	100.4	98.3	97.5	94.6	103.2	96.8	-	1.06612	0.0939119
P49406	MRPL19	39S ribosomal protein L19, mitochondrial OS=Homo sapiens OX=9606 GN=MRPL19 PE=1 SV=2	14	4	4	4	292	33.5	9.5	146	105.9	99.9	103.8	101.5	91.6	97.3	103.2	96.8	-	1.06612	0.129908
Q13418	ILK	Integrin-linked protein kinase OS=Homo sapiens OX=9606 GN=ILK PE=1 SV=2	42	17	25	17	452	51.4	8.07	453	104.1	102.2	103.3	95.7	96.1	98.6	103.2	96.8	-	1.06612	0.00381331
Q9HCM4	EPB41L5	Band 4.1-like protein 5 OS=Homo sapiens OX=9606 GN=EPB41L5 PE=1 SV=3	5	2	3	2	733	81.8	6.58	103	108.5	97.2	103.9	90.1	94.3	106	103.2	96.8	-	1.06612	0.330184
Q9HD33	MRPL47	39S ribosomal protein L47, mitochondrial OS=Homo sapiens OX=9606 GN=MRPL47 PE=1 SV=2	18	4	7	4	250	29.4	10.37	134	100.3	97.8	111.5	97.5	96.4	96.5	103.2	96.8	-	1.06612	0.204561
Q5TAT6	COL13A1	Collagen alpha-1(XIII) chain OS=Homo sapiens OX=9606 GN=COL13A1 PE=1 SV=1	3	2	3	2	717	69.9	9.17	57	114.9	96.7	97.9	101.2	93.8	95.4	103.167	96.8	-	1.06577	0.368846
P49757	NUMB	Protein numb homolog OS=Homo sapiens OX=9606 GN=NUMB PE=1 SV=2	20	11	14	7	651	70.8	8.51	222	102.2	103.9	103.4	96	96.8	97.6	103.167	96.8	-	1.06577	0.000741117
Q92685	ALG3	Dol-P-Man:Man(5)GlcNAc(2)-PP-Dol alpha-1,3-mannosyltransferase OS=Homo sapiens OX=9606 GN=ALG3 PE=1 SV=1	2	1	1	1	438	50.1	9.44	30	123.2	99.9	86.4	96.9	98.5	95	103.167	96.8	-	1.06577	0.587062
Q8WUD4	CCDC12	Coiled-coil domain-containing protein 12 OS=Homo sapiens OX=9606 GN=CCDC12 PE=1 SV=1	41	5	6	5	166	19.2	7.34	102	78.1	78.4	153.1	96	93.3	101.2	103.2	96.8333	-	1.06575	0.811959
Q02809	PLOD1	Procollagen-lysine,2-oxoglutarate 5-dioxygenase 1 OS=Homo sapiens OX=9606 GN=PLOD1 PE=1 SV=2	30	19	37	18	727	83.5	6.95	1052	105.9	101.7	102	97.6	99.1	93.8	103.2	96.8333	-	1.06575	0.0375135
P60660	MYL6	Myosin light polypeptide 6 OS=Homo sapiens OX=9606 GN=MYL6 PE=1 SV=2	71	10	36	8	151	16.9	4.65	700	102.3	103.4	103.9	94.9	97.8	97.8	103.2	96.8333	-	1.06575	0.00408574
Q6NUQ4	TMEM214	Transmembrane protein 214 OS=Homo sapiens OX=9606 GN=TMEM214 PE=1 SV=2	22	15	18	15	689	77.1	9.14	287	102	104.1	103.5	95.4	99.3	95.8	103.2	96.8333	-	1.06575	0.0101111
Q14203	DCTN1	Dynactin subunit 1 OS=Homo sapiens OX=9606 GN=DCTN1 PE=1 SV=3	49	50	76	50	1278	141.6	5.81	1526	103.7	103.3	102.4	97.1	98.3	95	103.133	96.8	-	1.06543	0.00365283
Q96HY7	DHTKD1	Probable 2-oxoglutarate dehydrogenase E1 component DHKTD1, mitochondrial OS=Homo sapiens OX=9606 GN=DHTKD1 PE=1 SV=2	8	4	4	4	919	103	6.93	93	100.4	102.2	106.9	97.5	99.6	93.4	103.167	96.8333	-	1.0654	0.0758174
O60313	OPA1	Dynamin-like 120 kDa protein, mitochondrial OS=Homo sapiens OX=9606 GN=OPA1 PE=1 SV=3	41	33	48	33	960	111.6	7.87	1087	103.8	102.2	103.5	97.5	94.8	98.2	103.167	96.8333	-	1.0654	0.00525271
Q9NX76	CMTM6	CKLF-like MARVEL transmembrane domain-containing protein 6 OS=Homo sapiens OX=9606 GN=CMTM6 PE=1 SV=1	9	2	2	2	183	20.4	5.29	61	94.3	102.9	112.3	93.1	99.6	97.8	103.167	96.8333	-	1.0654	0.317282
P60520	GABARAPL2	Gamma-aminobutyric acid receptor-associated protein-like 2 OS=Homo sapiens OX=9606 GN=GABARAPL2 PE=1 SV=1	29	4	6	3	117	13.7	8.1	79	103.3	102.1	104.1	93.3	97.4	99.8	103.167	96.8333	-	1.0654	0.0331802
Q8N1G0	ZNF687	Zinc finger protein 687 OS=Homo sapiens OX=9606 GN=ZNF687 PE=1 SV=1	7	6	7	6	1237	129.4	8.19	79	114.1	96.7	98.7	93.8	96.3	100.4	103.167	96.8333	-	1.0654	0.337975
Q04656	ATP7A	Copper-transporting ATPase 1 OS=Homo sapiens OX=9606 GN=ATP7A PE=1 SV=4	1	1	1	1	1500	163.3	6.33	0	106.9	106.2	96.4	92.7	100.1	97.7	103.167	96.8333	-	1.0654	0.191131
Q99959	PKP2	Plakophilin-2 OS=Homo sapiens OX=9606 GN=PKP2 PE=1 SV=2	12	8	9	8	881	97.4	9.33	138	101.3	104.3	103.9	97.2	94.6	98.7	103.167	96.8333	-	1.0654	0.0141563
P59998	ARPC4	Actin-related protein 2/3 complex subunit 4 OS=Homo sapiens OX=9606 GN=ARPC4 PE=1 SV=3	64	10	21	10	168	19.7	8.43	313	103.6	103.9	101.9	96.1	98.2	96.2	103.133	96.8333	-	1.06506	0.00242838
P12814	ACTN1	Alpha-actinin-1 OS=Homo sapiens OX=9606 GN=ACTN1 PE=1 SV=2	77	60	206	36	892	103	5.41	5537	102.8	104.5	102.1	96.6	97	96.9	103.133	96.8333	-	1.06506	0.000953528
Q8TCG2	PI4K2B	Phosphatidylinositol 4-kinase type 2-beta OS=Homo sapiens OX=9606 GN=PI4K2B PE=1 SV=1	2	1	1	1	481	54.7	5.97	28	108.9	101.7	98.8	99.2	97.5	93.8	103.133	96.8333	-	1.06506	0.137463
Q16181	SEPTIN7	Septin-7 OS=Homo sapiens OX=9606 GN=SEPTIN7 PE=1 SV=2	45	19	37	18	437	50.6	8.63	784	103.1	104.1	102.3	96	97.9	96.7	103.167	96.8667	-	1.06504	0.00116115
Q92665	MRPS31	28S ribosomal protein S31, mitochondrial OS=Homo sapiens OX=9606 GN=MRPS31 PE=1 SV=3	35	11	12	11	395	45.3	9.29	250	106.3	102.4	100.8	97.5	97.4	95.7	103.167	96.8667	-	1.06504	0.0221221
Q8N129	CNPY4	Protein canopy homolog 4 OS=Homo sapiens OX=9606 GN=CNPY4 PE=2 SV=1	5	1	1	1	248	28.3	4.64	24	107.7	100.3	101.4	95.1	99.3	96.2	103.133	96.8667	-	1.06469	0.0754584
Q8N543	OGFOD1	Prolyl 3-hydroxylase OGFOD1 OS=Homo sapiens OX=9606 GN=OGFOD1 PE=1 SV=1	19	7	7	7	542	63.2	5.11	112	106.5	100	102.9	93.3	89.1	108.2	103.133	96.8667	-	1.06469	0.361785
Q86V48	LUZP1	Leucine zipper protein 1 OS=Homo sapiens OX=9606 GN=LUZP1 PE=1 SV=2	16	15	17	15	1076	120.2	8.5	170	104.4	102	103	95.4	95.9	99.3	103.133	96.8667	-	1.06469	0.0112703
Q5T3J3	LRIF1	Ligand-dependent nuclear receptor-interacting factor 1 OS=Homo sapiens OX=9606 GN=LRIF1 PE=1 SV=1	3	1	1	1	769	84.5	9.72	21	103.9	95.4	110.1	100.1	91	99.5	103.133	96.8667	-	1.06469	0.292631
O00400	SLC33A1	Acetyl-coenzyme A transporter 1 OS=Homo sapiens OX=9606 GN=SLC33A1 PE=1 SV=1	7	3	3	3	549	60.9	7.33	84	97.3	103.4	108.7	96.2	97.3	97.1	103.133	96.8667	-	1.06469	0.131337
Q9NYI0	PSD3	PH and SEC7 domain-containing protein 3 OS=Homo sapiens OX=9606 GN=PSD3 PE=1 SV=2	4	3	3	3	1048	116	5.99	71	106.4	97.5	105.5	92.7	101.1	96.8	103.133	96.8667	-	1.06469	0.167875
Q7Z3K6	MIER3	Mesoderm induction early response protein 3 OS=Homo sapiens OX=9606 GN=MIER3 PE=1 SV=2	3	1	1	1	550	61.4	4.51	31	111.8	98.1	99.5	105.5	89.2	95.9	103.133	96.8667	-	1.06469	0.384793
P29590	PML	Protein PML OS=Homo sapiens OX=9606 GN=PML PE=1 SV=3	32	24	36	24	882	97.5	6.21	655	103.4	103.5	102.5	99.6	96.6	94.4	103.133	96.8667	-	1.06469	0.0152388
O75381	PEX14	Peroxisomal membrane protein PEX14 OS=Homo sapiens OX=9606 GN=PEX14 PE=1 SV=1	15	5	9	5	377	41.2	4.94	270	104.1	103.4	101.8	95.6	99.1	95.9	103.1	96.8667	-	1.06435	0.00893177
Q15582	TGFBI	Transforming growth factor-beta-induced protein ig-h3 OS=Homo sapiens OX=9606 GN=TGFBI PE=1 SV=1	5	3	3	3	683	74.6	7.71	70	112.7	99.4	97.2	96.7	102.7	91.2	103.1	96.8667	-	1.06435	0.348231
Q68DQ2	CRYBG3	Very large A-kinase anchor protein OS=Homo sapiens OX=9606 GN=CRYBG3 PE=1 SV=3	2	3	3	3	2970	330.4	5.2	90	102.5	99.4	107.4	94.5	90.5	105.6	103.1	96.8667	-	1.06435	0.287235
O60271	SPAG9	C-Jun-amino-terminal kinase-interacting protein 4 OS=Homo sapiens OX=9606 GN=SPAG9 PE=1 SV=4	37	37	43	37	1321	146.1	5.15	739	103.7	102.4	103.2	96.5	96.2	97.9	103.1	96.8667	-	1.06435	0.000646626
P30101	PDIA3	Protein disulfide-isomerase A3 OS=Homo sapiens OX=9606 GN=PDIA3 PE=1 SV=4	69	34	94	34	505	56.7	6.35	2027	104.8	105.2	99.3	97	100.4	93.2	103.1	96.8667	-	1.06435	0.0915196
Q8NEZ5	FBXO22	F-box only protein 22 OS=Homo sapiens OX=9606 GN=FBXO22 PE=1 SV=1	17	6	6	6	403	44.5	7.03	91	107.9	101.1	100.3	95	95.2	100.4	103.1	96.8667	-	1.06435	0.105425
Q15642	TRIP10	Cdc42-interacting protein 4 OS=Homo sapiens OX=9606 GN=TRIP10 PE=1 SV=3	50	25	37	25	601	68.3	5.73	726	103.1	104.8	101.4	98.1	97.3	95.2	103.1	96.8667	-	1.06435	0.00887125
Q9NQ11	ATP13A2	Cation-transporting ATPase 13A2 OS=Homo sapiens OX=9606 GN=ATP13A2 PE=1 SV=2	1	1	1	1	1180	128.7	8.12	44	97	98.9	113.5	101.2	92.7	96.8	103.133	96.9	-	1.06433	0.34014
Q9NW81	DMAC2	Distal membrane-arm assembly complex protein 2 OS=Homo sapiens OX=9606 GN=DMAC2 PE=1 SV=3	11	2	3	2	257	29.2	6.43	102	107.2	100	102.2	98.7	96.3	95.7	103.133	96.9	-	1.06433	0.0547753
Q92934	BAD	Bcl2-associated agonist of cell death OS=Homo sapiens OX=9606 GN=BAD PE=1 SV=3	21	3	3	3	168	18.4	7.15	94	102.2	104.3	102.8	94.3	100.2	96.2	103.1	96.9	-	1.06398	0.0284141
Q9UM00	TMCO1	Calcium load-activated calcium channel OS=Homo sapiens OX=9606 GN=TMCO1 PE=1 SV=2	22	5	8	5	239	27.1	10.26	209	102.2	103.1	104	97.1	96.1	97.5	103.1	96.9	-	1.06398	0.000740236
Q9BRP1	PDCD2L	Programmed cell death protein 2-like OS=Homo sapiens OX=9606 GN=PDCD2L PE=1 SV=1	9	2	2	2	358	39.4	4.86	36	107	96.9	105.4	99.4	90.5	100.8	103.1	96.9	-	1.06398	0.240106
Q9BW91	NUDT9	ADP-ribose pyrophosphatase, mitochondrial OS=Homo sapiens OX=9606 GN=NUDT9 PE=1 SV=1	13	5	6	5	350	39.1	8.22	79	100.9	101.4	107	98.5	94.4	97.8	103.1	96.9	-	1.06398	0.0563027
P60953	CDC42	Cell division control protein 42 homolog OS=Homo sapiens OX=9606 GN=CDC42 PE=1 SV=2	48	8	21	7	191	21.2	6.55	526	104.9	105	99.4	96.3	98.2	96.2	103.1	96.9	-	1.06398	0.0341453
Q16891	IMMT	MICOS complex subunit MIC60 OS=Homo sapiens OX=9606 GN=IMMT PE=1 SV=1	60	42	71	42	758	83.6	6.48	1525	103.4	103.9	102	97.8	97.1	95.8	103.1	96.9	-	1.06398	0.00161356
O15530	PDPK1	3-phosphoinositide-dependent protein kinase 1 OS=Homo sapiens OX=9606 GN=PDPK1 PE=1 SV=1	10	4	4	4	556	63.1	7.36	72	98.6	105.1	105.6	88.8	98.6	103.3	103.1	96.9	-	1.06398	0.268563
P31946	YWHAB	14-3-3 protein beta/alpha OS=Homo sapiens OX=9606 GN=YWHAB PE=1 SV=3	69	14	72	7	246	28.1	4.83	1683	103.6	104.6	101.1	93.4	97	100.3	103.1	96.9	-	1.06398	0.0509513
Q9Y6I3	EPN1	Epsin-1 OS=Homo sapiens OX=9606 GN=EPN1 PE=1 SV=2	24	8	9	8	576	60.3	4.83	321	102.2	99	108.1	96.4	97.8	96.5	103.1	96.9	-	1.06398	0.0835183
Q9NZJ7	MTCH1	Mitochondrial carrier homolog 1 OS=Homo sapiens OX=9606 GN=MTCH1 PE=1 SV=1	14	5	7	5	389	41.5	9.32	93	105.6	102.8	100.9	96.3	97.8	96.6	103.1	96.9	-	1.06398	0.0125874
Q8WV92	MITD1	MIT domain-containing protein 1 OS=Homo sapiens OX=9606 GN=MITD1 PE=1 SV=1	14	2	2	2	249	29.3	8	95	108.4	100.9	99.9	99.1	87.5	104.1	103.067	96.9	-	1.06364	0.332676
P42224	STAT1	Signal transducer and activator of transcription 1-alpha/beta OS=Homo sapiens OX=9606 GN=STAT1 PE=1 SV=2	42	29	41	29	750	87.3	6.05	624	105.2	101.2	102.8	97.5	96	97.2	103.067	96.9	-	1.06364	0.0078418
O14657	TOR1B	Torsin-1B OS=Homo sapiens OX=9606 GN=TOR1B PE=1 SV=2	6	2	3	2	336	38	8.54	81	107	99	103.2	97.8	91.3	101.6	103.067	96.9	-	1.06364	0.17925
Q96IY1	NSL1	Kinetochore-associated protein NSL1 homolog OS=Homo sapiens OX=9606 GN=NSL1 PE=1 SV=3	15	3	3	3	281	32.1	6.79	56	106.3	102.4	100.5	95.3	107.7	87.7	103.067	96.9	-	1.06364	0.367368
P19440	GGT1	Glutathione hydrolase 1 proenzyme OS=Homo sapiens OX=9606 GN=GGT1 PE=1 SV=2	3	1	1	1	569	61.4	7.12	52	107.4	96.5	105.3	95.5	102.2	93	103.067	96.9	-	1.06364	0.226914
Q9BUF5	TUBB6	Tubulin beta-6 chain OS=Homo sapiens OX=9606 GN=TUBB6 PE=1 SV=1	73	22	87	10	446	49.8	4.88	1973	102.8	104.8	101.6	96.7	96.1	97.9	103.067	96.9	-	1.06364	0.00454211
Q7Z3C6	ATG9A	Autophagy-related protein 9A OS=Homo sapiens OX=9606 GN=ATG9A PE=1 SV=3	9	6	9	6	839	94.4	6.67	239	104.5	103.6	101.1	95.7	99.6	95.4	103.067	96.9	-	1.06364	0.0218949
Q15628	TRADD	Tumor necrosis factor receptor type 1-associated DEATH domain protein OS=Homo sapiens OX=9606 GN=TRADD PE=1 SV=2	29	6	9	6	312	34.2	6.27	199	103	100.8	105.5	94.8	98.6	97.4	103.1	96.9333	-	1.06362	0.0248555
O95861	BPNT1	3'(2'),5'-bisphosphate nucleotidase 1 OS=Homo sapiens OX=9606 GN=BPNT1 PE=1 SV=1	51	15	19	15	308	33.4	5.69	413	102.3	104.1	102.9	95.5	99.5	95.8	103.1	96.9333	-	1.06362	0.0113888
Q9UMZ2	SYNRG	Synergin gamma OS=Homo sapiens OX=9606 GN=SYNRG PE=1 SV=2	9	10	10	10	1314	140.6	5.03	121	104.1	98.8	106.3	95.5	96	99.3	103.067	96.9333	-	1.06327	0.0720544
Q15369	ELOC	Elongin-C OS=Homo sapiens OX=9606 GN=ELOC PE=1 SV=1	47	4	13	4	112	12.5	4.78	344	101	106.6	101.6	93.3	96.2	101.3	103.067	96.9333	-	1.06327	0.104931
Q9HD20	ATP13A1	Manganese-transporting ATPase 13A1 OS=Homo sapiens OX=9606 GN=ATP13A1 PE=1 SV=2	10	11	12	11	1204	132.9	8.13	78	103.1	101.9	104.2	99.9	97.5	93.4	103.067	96.9333	-	1.06327	0.0380056
Q5SRD1	TIMM23B	Putative mitochondrial import inner membrane translocase subunit Tim23B OS=Homo sapiens OX=9606 GN=TIMM23B PE=5 SV=2	4	1	1	1	257	28	9.39	24	108.4	102.6	98.2	97.9	89.9	103	103.067	96.9333	-	1.06327	0.272373
P39210	MPV17	Protein Mpv17 OS=Homo sapiens OX=9606 GN=MPV17 PE=1 SV=1	13	1	1	1	176	19.7	9.47	104	92.5	99.6	117.1	88.7	105.3	96.8	103.067	96.9333	-	1.06327	0.521553
P0DP23	CALM1	Calmodulin-1 OS=Homo sapiens OX=9606 GN=CALM1 PE=1 SV=1	93	13	78	11	149	16.8	4.22	2012	108.8	102	98.3	96.2	98.3	96.3	103.033	96.9333	-	1.06293	0.124874
A0FGR8	ESYT2	Extended synaptotagmin-2 OS=Homo sapiens OX=9606 GN=ESYT2 PE=1 SV=1	28	18	30	18	921	102.3	9.26	797	100.2	100.6	108.3	94.3	98.8	97.7	103.033	96.9333	-	1.06293	0.108651
O43572	AKAP10	A-kinase anchor protein 10, mitochondrial OS=Homo sapiens OX=9606 GN=AKAP10 PE=1 SV=2	12	6	7	6	662	73.8	6.39	160	105.1	100.8	103.2	95.3	98.2	97.3	103.033	96.9333	-	1.06293	0.0156317
P55265	ADAR	Double-stranded RNA-specific adenosine deaminase OS=Homo sapiens OX=9606 GN=ADAR PE=1 SV=4	24	24	31	24	1226	136	8.65	651	116	89.6	103.6	99	96.2	95.7	103.067	96.9667	-	1.06291	0.472279
P04075	ALDOA	Fructose-bisphosphate aldolase A OS=Homo sapiens OX=9606 GN=ALDOA PE=1 SV=2	79	29	163	23	364	39.4	8.09	5688	101.5	105	102.6	94.4	101.9	94.6	103.033	96.9667	-	1.06256	0.0859245
P62328	TMSB4X	Thymosin beta-4 OS=Homo sapiens OX=9606 GN=TMSB4X PE=1 SV=2	77	6	18	4	44	5.1	5.06	103	105.2	105.8	98.1	74	117.1	99.8	103.033	96.9667	-	1.06256	0.65937
Q9Y2Z2	MTO1	Protein MTO1 homolog, mitochondrial OS=Homo sapiens OX=9606 GN=MTO1 PE=1 SV=2	2	1	1	1	717	79.9	8.31	43	110.8	96.4	101.9	100.5	93	97.4	103.033	96.9667	-	1.06256	0.268576
Q969H8	MYDGF	Myeloid-derived growth factor OS=Homo sapiens OX=9606 GN=MYDGF PE=1 SV=1	27	5	8	5	173	18.8	6.68	115	106.9	105.9	96.3	95.1	100.4	95.4	103.033	96.9667	-	1.06256	0.184794
Q8WV93	AFG1L	AFG1-like ATPase OS=Homo sapiens OX=9606 GN=AFG1L PE=1 SV=2	6	3	4	3	481	54.8	7.27	48	93.9	99.9	115.3	96.5	95.8	98.6	103.033	96.9667	-	1.06256	0.39875
Q9NRW3	APOBEC3C	DNA dC->dU-editing enzyme APOBEC-3C OS=Homo sapiens OX=9606 GN=APOBEC3C PE=1 SV=2	27	3	5	3	190	22.8	7.59	152	110	97.6	101.5	96	93.7	101.2	103.033	96.9667	-	1.06256	0.229362
Q9BSD7	NTPCR	Cancer-related nucleoside-triphosphatase OS=Homo sapiens OX=9606 GN=NTPCR PE=1 SV=1	39	6	6	6	190	20.7	9.54	114	107	104.7	97.4	98.3	96.4	96.2	103.033	96.9667	-	1.06256	0.110629
P34949	MPI	Mannose-6-phosphate isomerase OS=Homo sapiens OX=9606 GN=MPI PE=1 SV=2	31	10	12	10	423	46.6	5.95	343	107.6	99.7	101.8	95.2	100.9	94.8	103.033	96.9667	-	1.06256	0.119865
Q9H6H4	REEP4	Receptor expression-enhancing protein 4 OS=Homo sapiens OX=9606 GN=REEP4 PE=1 SV=1	8	2	4	2	257	29.4	9.73	79	97	106	106.1	94.4	100.2	96.3	103.033	96.9667	-	1.06256	0.154987
Q9P2K8	EIF2AK4	eIF-2-alpha kinase GCN2 OS=Homo sapiens OX=9606 GN=EIF2AK4 PE=1 SV=3	12	17	18	17	1649	186.8	6.28	274	103.9	103.3	101.9	99.9	94.7	96.3	103.033	96.9667	-	1.06256	0.0211767
Q7L5Y9	MAEA	E3 ubiquitin-protein transferase MAEA OS=Homo sapiens OX=9606 GN=MAEA PE=1 SV=1	7	2	2	2	396	45.3	8.69	63	104.9	99.4	104.7	96.1	91.4	103.4	103	96.9667	-	1.06222	0.199369
Q7L5N1	COPS6	COP9 signalosome complex subunit 6 OS=Homo sapiens OX=9606 GN=COPS6 PE=1 SV=1	40	10	12	10	327	36.1	5.73	298	102.9	102.9	103.2	89.8	100.3	100.8	103	96.9667	-	1.06222	0.167919
P54098	POLG	DNA polymerase subunit gamma-1 OS=Homo sapiens OX=9606 GN=POLG PE=1 SV=1	5	4	5	4	1239	139.5	6.9	147	104.5	100.6	103.9	96.5	92.7	101.7	103	96.9667	-	1.06222	0.103954
Q9GZT6	CCDC90B	Coiled-coil domain-containing protein 90B, mitochondrial OS=Homo sapiens OX=9606 GN=CCDC90B PE=1 SV=2	11	3	3	3	254	29.5	7.55	84	107.4	102.3	99.3	97.1	97.2	96.6	103	96.9667	-	1.06222	0.0637096
O75521	ECI2	Enoyl-CoA delta isomerase 2, mitochondrial OS=Homo sapiens OX=9606 GN=ECI2 PE=1 SV=4	45	15	23	15	394	43.6	9	678	103.6	103.1	102.4	97.1	98.1	95.8	103.033	97	-	1.0622	0.00130482
Q9UL45	BLOC1S6	Biogenesis of lysosome-related organelles complex 1 subunit 6 OS=Homo sapiens OX=9606 GN=BLOC1S6 PE=1 SV=1	11	1	1	1	172	19.7	6.4	56	115.6	90	103.5	93.5	93	104.5	103.033	97	-	1.0622	0.507139
O15164	TRIM24	Transcription intermediary factor 1-alpha OS=Homo sapiens OX=9606 GN=TRIM24 PE=1 SV=3	6	6	7	5	1050	116.8	7.11	105	104.6	99.8	104.7	93	96.5	101.5	103.033	97	-	1.0622	0.110221
O15264	MAPK13	Mitogen-activated protein kinase 13 OS=Homo sapiens OX=9606 GN=MAPK13 PE=1 SV=1	17	6	8	5	365	42.1	8.38	103	96.4	99.7	112.9	99.8	95.6	95.6	103	97	-	1.06186	0.315373
Q9H9G7	AGO3	Protein argonaute-3 OS=Homo sapiens OX=9606 GN=AGO3 PE=1 SV=2	10	7	8	2	860	97.3	9.11	98	98.3	105.4	105.3	93.2	96.4	101.4	103	97	-	1.06186	0.147691
Q92692	NECTIN2	Nectin-2 OS=Homo sapiens OX=9606 GN=NECTIN2 PE=1 SV=1	10	5	6	5	538	57.7	4.82	110	101.1	103.9	104	98	97.9	95.1	103	97	-	1.06186	0.011127
P51148	RAB5C	Ras-related protein Rab-5C OS=Homo sapiens OX=9606 GN=RAB5C PE=1 SV=2	72	11	37	8	216	23.5	8.41	1281	103.8	105.3	99.9	93	100.5	97.5	103	97	-	1.06186	0.0911541
P61160	ACTR2	Actin-related protein 2 OS=Homo sapiens OX=9606 GN=ACTR2 PE=1 SV=1	31	11	28	11	394	44.7	6.74	750	104.4	104.8	99.8	96.4	99.4	95.2	103	97	-	1.06186	0.0419186
Q9BVT8	TMUB1	Transmembrane and ubiquitin-like domain-containing protein 1 OS=Homo sapiens OX=9606 GN=TMUB1 PE=1 SV=1	21	3	3	3	246	26.2	5.72	59	102.2	102.8	104	97	96.2	97.8	103	97	-	1.06186	0.00103076
Q9NRM1	ENAM	Enamelin OS=Homo sapiens OX=9606 GN=ENAM PE=1 SV=3	1	1	2	1	1142	128.7	6.83	18	104.3	104.2	100.5	94.2	97.6	99.2	103	97	-	1.06186	0.0360841
O75828	CBR3	Carbonyl reductase [NADPH] 3 OS=Homo sapiens OX=9606 GN=CBR3 PE=1 SV=3	47	9	12	6	277	30.8	6.18	360	100.1	104.5	104.4	94.3	102.8	93.9	103	97	-	1.06186	0.138102
Q5J8M3	EMC4	ER membrane protein complex subunit 4 OS=Homo sapiens OX=9606 GN=EMC4 PE=1 SV=2	26	4	6	4	183	20.1	8.62	184	100.6	102.4	106	94.6	97	99.4	103	97	-	1.06186	0.0465145
Q6PIU2	NCEH1	Neutral cholesterol ester hydrolase 1 OS=Homo sapiens OX=9606 GN=NCEH1 PE=1 SV=3	29	9	20	9	408	45.8	7.23	562	102.8	103.9	102.3	100.3	95.4	95.3	103	97	-	1.06186	0.0250022
Q9P2W9	STX18	Syntaxin-18 OS=Homo sapiens OX=9606 GN=STX18 PE=1 SV=1	19	6	6	6	335	38.7	5.49	37	106.1	96.6	106.2	100.1	91.8	99.1	102.967	97	-	1.06151	0.221165
Q8IY31	IFT20	Intraflagellar transport protein 20 homolog OS=Homo sapiens OX=9606 GN=IFT20 PE=1 SV=1	12	1	1	1	132	15.3	5.12	58	97.3	103.2	108.4	105.4	91.5	94.1	102.967	97	-	1.06151	0.326191
O75947	ATP5PD	ATP synthase subunit d, mitochondrial OS=Homo sapiens OX=9606 GN=ATP5PD PE=1 SV=3	73	11	19	11	161	18.5	5.3	344	105.2	103.6	100.1	99.3	97.2	94.5	102.967	97	-	1.06151	0.0435818
O15270	SPTLC2	Serine palmitoyltransferase 2 OS=Homo sapiens OX=9606 GN=SPTLC2 PE=1 SV=1	21	9	12	9	562	62.9	7.78	279	104.9	101.5	102.5	98	95.5	97.5	102.967	97	-	1.06151	0.00920265
O43402	EMC8	ER membrane protein complex subunit 8 OS=Homo sapiens OX=9606 GN=EMC8 PE=1 SV=1	33	6	9	6	210	23.8	6.4	205	104.8	103	101.2	96.1	95.6	99.4	103	97.0333	-	1.06149	0.0195569
Q7Z2Z2	EFL1	Elongation factor-like GTPase 1 OS=Homo sapiens OX=9606 GN=EFL1 PE=1 SV=2	22	17	19	17	1120	125.4	5.91	517	103.7	101.9	103.3	99.3	96.6	95.2	102.967	97.0333	-	1.06115	0.0108984
Q14554	PDIA5	Protein disulfide-isomerase A5 OS=Homo sapiens OX=9606 GN=PDIA5 PE=1 SV=1	26	13	17	13	519	59.6	7.91	296	101.7	104.7	102.5	97.5	98.6	95	102.967	97.0333	-	1.06115	0.0130421
Q9BY43	CHMP4A	Charged multivesicular body protein 4a OS=Homo sapiens OX=9606 GN=CHMP4A PE=1 SV=3	22	5	6	4	222	25.1	4.7	173	105.3	102	101.6	97.6	95.7	97.8	102.967	97.0333	-	1.06115	0.0117332
Q9BV81	EMC6	ER membrane protein complex subunit 6 OS=Homo sapiens OX=9606 GN=EMC6 PE=1 SV=1	20	2	3	2	110	12	10.07	86	100	102	106.9	94.7	98.9	97.5	102.967	97.0333	-	1.06115	0.0682369
Q70J99	UNC13D	Protein unc-13 homolog D OS=Homo sapiens OX=9606 GN=UNC13D PE=1 SV=1	30	24	36	24	1090	123.2	6.65	709	103.6	100.8	104.5	96.7	96	98.4	102.967	97.0333	-	1.06115	0.0109343
P51157	RAB28	Ras-related protein Rab-28 OS=Homo sapiens OX=9606 GN=RAB28 PE=1 SV=2	5	1	1	1	221	24.8	5.97	24	109.3	95.8	103.8	104.2	91.8	95.1	102.967	97.0333	-	1.06115	0.333188
Q9H553	ALG2	Alpha-1,3/1,6-mannosyltransferase ALG2 OS=Homo sapiens OX=9606 GN=ALG2 PE=1 SV=1	18	5	7	5	416	47.1	7.05	123	103.6	99.9	105.4	97.5	98.9	94.7	102.967	97.0333	-	1.06115	0.0434985
Q8N6R0	EEF1AKNMT	eEF1A lysine and N-terminal methyltransferase OS=Homo sapiens OX=9606 GN=EEF1AKNMT PE=1 SV=1	21	10	12	10	699	78.7	6.73	377	106.6	97.7	104.5	100.7	92.4	98	102.933	97.0333	-	1.0608	0.179571
Q16644	MAPKAPK3	MAP kinase-activated protein kinase 3 OS=Homo sapiens OX=9606 GN=MAPKAPK3 PE=1 SV=1	21	8	10	6	382	43	7.28	206	105.9	103.6	99.3	98.3	95.2	97.6	102.933	97.0333	-	1.0608	0.0516781
Q15751	HERC1	Probable E3 ubiquitin-protein ligase HERC1 OS=Homo sapiens OX=9606 GN=HERC1 PE=1 SV=2	0	1	1	1	4861	531.9	6.04	0	101.8	103.5	103.6	97.7	95.8	97.7	102.967	97.0667	-	1.06078	0.0023794
P14649	MYL6B	Myosin light chain 6B OS=Homo sapiens OX=9606 GN=MYL6B PE=1 SV=1	27	5	10	3	208	22.8	5.73	182	102.2	105.6	101.1	97.9	98.5	94.8	102.967	97.0667	-	1.06078	0.0292455
Q9Y676	MRPS18B	28S ribosomal protein S18b, mitochondrial OS=Homo sapiens OX=9606 GN=MRPS18B PE=1 SV=1	24	5	6	5	258	29.4	9.38	63	105	102.3	101.6	98.9	94.4	97.9	102.967	97.0667	-	1.06078	0.0262084
Q9NPH0	ACP6	Lysophosphatidic acid phosphatase type 6 OS=Homo sapiens OX=9606 GN=ACP6 PE=1 SV=3	10	3	4	3	428	48.9	6.47	64	100.8	100.2	107.7	97.7	99	94.4	102.9	97.0333	-	1.06046	0.101445
O76071	CIAO1	Probable cytosolic iron-sulfur protein assembly protein CIAO1 OS=Homo sapiens OX=9606 GN=CIAO1 PE=1 SV=1	35	8	12	8	339	37.8	4.97	379	104.9	101.9	102	97.7	95	98.5	102.933	97.0667	-	1.06044	0.0153596
Q8N3D4	EHBP1L1	EH domain-binding protein 1-like protein 1 OS=Homo sapiens OX=9606 GN=EHBP1L1 PE=1 SV=2	27	30	34	29	1523	161.8	4.83	694	104.7	100.4	103.7	97.2	97.6	96.4	102.933	97.0667	-	1.06044	0.0120812
Q8NCN5	PDPR	Pyruvate dehydrogenase phosphatase regulatory subunit, mitochondrial OS=Homo sapiens OX=9606 GN=PDPR PE=1 SV=2	19	13	15	13	879	99.3	6.35	348	102.9	101.4	104.5	97.5	99.1	94.6	102.933	97.0667	-	1.06044	0.0211241
Q96DA6	DNAJC19	Mitochondrial import inner membrane translocase subunit TIM14 OS=Homo sapiens OX=9606 GN=DNAJC19 PE=1 SV=3	20	2	3	2	116	12.5	10.1	91	99.3	106.8	102.7	96	95.6	99.6	102.933	97.0667	-	1.06044	0.0799153
Q9NPA0	EMC7	ER membrane protein complex subunit 7 OS=Homo sapiens OX=9606 GN=EMC7 PE=1 SV=1	24	5	5	5	242	26.5	9.25	42	103.4	102.1	103.3	92.9	101.1	97.2	102.933	97.0667	-	1.06044	0.0712282
Q15771	RAB30	Ras-related protein Rab-30 OS=Homo sapiens OX=9606 GN=RAB30 PE=1 SV=2	14	3	6	2	203	23	4.97	145	103.4	101.7	103.7	98.5	96.5	96.2	102.933	97.0667	-	1.06044	0.00353811
P22413	ENPP1	Ectonucleotide pyrophosphatase/phosphodiesterase family member 1 OS=Homo sapiens OX=9606 GN=ENPP1 PE=1 SV=2	9	6	6	6	925	104.9	7.14	66	106.7	98.5	103.5	94.8	98.3	98.1	102.9	97.0667	-	1.0601	0.0918536
O14579	COPE	Coatomer subunit epsilon OS=Homo sapiens OX=9606 GN=COPE PE=1 SV=3	59	11	20	11	308	34.5	5.12	738	104.1	105.1	99.5	94.4	99.8	97	102.9	97.0667	-	1.0601	0.0661113
O96005	CLPTM1	Cleft lip and palate transmembrane protein 1 OS=Homo sapiens OX=9606 GN=CLPTM1 PE=1 SV=1	15	8	10	8	669	76	6.3	219	103.7	100.7	104.3	95.9	95.4	99.9	102.9	97.0667	-	1.0601	0.0320686
P49116	NR2C2	Nuclear receptor subfamily 2 group C member 2 OS=Homo sapiens OX=9606 GN=NR2C2 PE=1 SV=1	4	2	2	2	596	65.4	6.28	93	105.8	101	102	97.1	93.3	100.9	102.933	97.1	-	1.06008	0.0913681
Q53S33	BOLA3	BolA-like protein 3 OS=Homo sapiens OX=9606 GN=BOLA3 PE=1 SV=1	21	2	2	2	107	12.1	9.64	97	102.4	103.8	102.5	99.3	94.4	97.6	102.9	97.1	-	1.05973	0.0182648
Q9UQC2	GAB2	GRB2-associated-binding protein 2 OS=Homo sapiens OX=9606 GN=GAB2 PE=1 SV=1	2	1	1	1	676	74.4	8.31	19	100	103.3	105.4	97.9	91.5	101.9	102.9	97.1	-	1.05973	0.1644
P40337	VHL	von Hippel-Lindau disease tumor suppressor OS=Homo sapiens OX=9606 GN=VHL PE=1 SV=2	11	2	2	2	213	24.1	4.73	36	110.6	92.4	105.7	98.1	88.8	104.4	102.9	97.1	-	1.05973	0.458531
Q8TAE8	GADD45GIP1	Growth arrest and DNA damage-inducible proteins-interacting protein 1 OS=Homo sapiens OX=9606 GN=GADD45GIP1 PE=1 SV=1	27	4	8	4	222	25.4	10.02	194	106.8	100.5	101.4	100.1	95.9	95.3	102.9	97.1	-	1.05973	0.0794839
Q14011	CIRBP	Cold-inducible RNA-binding protein OS=Homo sapiens OX=9606 GN=CIRBP PE=1 SV=1	33	4	9	4	172	18.6	9.51	391	109.3	100.3	99.1	99.3	93	99	102.9	97.1	-	1.05973	0.203265
Q9NX70	MED29	Mediator of RNA polymerase II transcription subunit 29 OS=Homo sapiens OX=9606 GN=MED29 PE=1 SV=1	6	1	1	1	200	21.1	6.29	33	99.3	108.6	100.8	96	107.5	87.8	102.9	97.1	-	1.05973	0.416023
Q9Y243	AKT3	RAC-gamma serine/threonine-protein kinase OS=Homo sapiens OX=9606 GN=AKT3 PE=1 SV=1	15	6	7	2	479	55.7	6.02	147	95.9	106.9	105.8	83.9	97.8	109.6	102.867	97.1	-	1.05939	0.521137
Q8TBM7	TMEM254	Transmembrane protein 254 OS=Homo sapiens OX=9606 GN=TMEM254 PE=1 SV=1	9	1	1	1	123	14.2	9.67	23	101.8	101.2	105.6	101.3	94.5	95.5	102.867	97.1	-	1.05939	0.0846875
Q96GS4	BORCS6	BLOC-1-related complex subunit 6 OS=Homo sapiens OX=9606 GN=BORCS6 PE=1 SV=2	7	2	3	2	357	37.2	5.76	93	100.4	100.9	107.3	97.8	97	96.5	102.867	97.1	-	1.05939	0.0626975
P61960	UFM1	Ubiquitin-fold modifier 1 OS=Homo sapiens OX=9606 GN=UFM1 PE=1 SV=1	68	5	9	5	85	9.1	9.31	235	105.7	102.3	100.6	92.7	94.1	104.5	102.867	97.1	-	1.05939	0.224045
[truncated: 4,310 more rows]
